# Supplementary material for: CgGCS, Encoding a Glucosylceramide Synthase, Is Required for Growth, Conidiation and Pathogenicity in Colletotrichum gloeosporioides
Source: Front Microbiol. 2019 May 21;10:1016. doi: 10.3389/fmicb.2019.01016 (PMC6536669; doi:10.3389/fmicb.2019.01016)
Supplement: FILE S2 — The most enriched pathways that was identified for differential expressed genes. [file Table_3.xls]

## Sheet: M-VS-W
Supplementar File S2 The most enriched pathways that was identified for differential expressed genes
Pathway	DEGs annotation in term	DEGs with KEGG annotation	Genes annotation in term	All genes with KEGG annotation	Pvalue	FDR	Enrichment factor	Pathway ID	Level 1	Level 2	Genes	KOs
Metabolic pathways	151	353	3166	8798	0.00581	0.14525	1.18871	ko01100	Metabolism	Global and overview maps	CGLO_05295;CGLO_05580;CGLO_08949;CGLO_04688;CGLO_13438;CGLO_02035;CGLO_12599;CGLO_13772;CGLO_04439;CGLO_09792;CGLO_09297;CGLO_01573;CGLO_09723;CGLO_07905;CGLO_11350;CGLO_15347;CGLO_13988;CGLO_14862;CGLO_01048;CGLO_04319;CGLO_17253;CGLO_15228;CGLO_03511;CGLO_08186;CGLO_05805;CGLO_17897;CGLO_06231;CGLO_07623;CGLO_01639;CGLO_16818;CGLO_07445;CGLO_08851;CGLO_15153;CGLO_17847;CGLO_02542;CGLO_00134;CGL…	K01904+K15634+K04487+K10437+K01930+K01598+K01613+K01051+K01939+K00451+K01487+K00020+K01809+K01895+K01897+K12743+K03635+K00831+K00108+K02320+K01230+K01908+K00616+K00688+K01183+K06123+K00276+K01626+K01568+K01784+K07748+K01951+K20457+K00489+K01176+K01046+K00010+K00767+K01198+K16066+K01952+K00480+K00737+K11153+K00218+K06001+K00129+K00274+K07750+K01772+K00306+K00838+K02433+K00505+K00275+K00720+K00450+…
Biosynthesis of secondary metabolites	59	353	1247	8798	0.1054	0.4216	1.17922	ko01110	Metabolism	Global and overview maps	CGLO_05295;CGLO_05580;CGLO_02035;CGLO_09297;CGLO_01573;CGLO_09326;CGLO_15347;CGLO_01048;CGLO_04319;CGLO_15228;CGLO_08186;CGLO_05805;CGLO_06231;CGLO_08851;CGLO_12116;CGLO_08441;CGLO_12800;CGLO_17265;CGLO_06778;CGLO_01133;CGLO_04933;CGLO_16777;CGLO_04556;CGLO_09939;CGLO_04207;CGLO_11166;CGLO_07308;CGLO_06735;CGLO_12568;CGLO_06155;CGLO_07751;CGLO_16889;CGLO_03252;CGLO_16568;CGLO_09559;CGLO_17679;CGL…	K01904+K15634+K01613+K01809+K01895+K18693+K00616+K00688+K00276+K01626+K01568+K01952+K00218+K06001+K00129+K00274+K01772+K00838+K00505+K01824+K00549+K00022+K00815+K00559+K00382+K00002+K01649+K03786+K13513+K13523+K05349+K10703+K00128+K01738+K00077+K13953+K00143+K01785
Biosynthesis of antibiotics	35	353	830	8798	0.4082	0.868511	1.05099	ko01130	Metabolism	Global and overview maps	CGLO_05580;CGLO_02864;CGLO_09297;CGLO_01573;CGLO_11350;CGLO_01048;CGLO_08186;CGLO_05805;CGLO_17897;CGLO_02542;CGLO_12116;CGLO_12800;CGLO_17711;CGLO_04556;CGLO_01887;CGLO_03252;CGLO_13091;CGLO_00757;CGLO_09559;CGLO_17679;CGLO_14386;CGLO_08008;CGLO_05482;CGLO_07765;CGLO_14796;CGLO_11290;CGLO_16097;CGLO_17470;CGLO_04557;CGLO_16502;CGLO_04263;CGLO_02509;CGLO_15583;CGLO_14735;CGLO_12351	K15634+K08658+K01809+K01895+K12743+K00831+K00616+K01626+K01568+K07748+K00010+K01952+K06001+K07750+K00838+K18280+K00022+K17475+K00815+K00559+K18281+K00382+K00002+K03786+K00128+K01738+K13953+K00143+K01785
Glycine, serine and threonine metabolism	21	353	430	8798	0.2141	0.621143	1.21719	ko00260	Metabolism	Amino acid metabolism	CGLO_05580;CGLO_11350;CGLO_15347;CGLO_15228;CGLO_06231;CGLO_15153;CGLO_12116;CGLO_12800;CGLO_06778;CGLO_00677;CGLO_06199;CGLO_02924;CGLO_11166;CGLO_08008;CGLO_08735;CGLO_08582;CGLO_05086;CGLO_16097;CGLO_17434;CGLO_17701;CGLO_16530	K15634+K00831+K00108+K00276+K16066+K06001+K00274+K00306+K00382
Tryptophan metabolism	20	353	235	8798	0.002015	0.0821333	2.12115	ko00380	Metabolism	Amino acid metabolism	CGLO_08949;CGLO_00460;CGLO_00617;CGLO_12673;CGLO_06778;CGLO_04556;CGLO_07139;CGLO_11166;CGLO_07948;CGLO_13427;CGLO_03252;CGLO_04455;CGLO_09559;CGLO_04848;CGLO_10962;CGLO_17470;CGLO_04263;CGLO_13172;CGLO_05927;CGLO_17861	K01501+K14338+K01426+K00274+K00838+K00022+K14264+K00128
Purine metabolism	20	353	376	8798	0.1313	0.48963	1.32572	ko00230	Metabolism	Nucleotide metabolism	CGLO_12599;CGLO_04439;CGLO_09723;CGLO_13988;CGLO_03511;CGLO_01639;CGLO_12116;CGLO_05106;CGLO_16316;CGLO_08518;CGLO_03770;CGLO_05654;CGLO_03022;CGLO_05183;CGLO_01692;CGLO_17576;CGLO_00393;CGLO_04015;CGLO_16669;CGLO_13035	K01939+K01487+K02320+K01951+K01952+K07127+K01488
Phenylalanine metabolism	19	353	185	8798	0.0003293	0.03293	2.55971	ko00360	Metabolism	Amino acid metabolism	CGLO_05295;CGLO_04688;CGLO_15228;CGLO_06231;CGLO_00617;CGLO_12673;CGLO_17265;CGLO_06778;CGLO_04556;CGLO_09939;CGLO_07139;CGLO_11166;CGLO_17960;CGLO_06155;CGLO_09559;CGLO_04848;CGLO_10962;CGLO_08735;CGLO_17434	K01904+K10437+K00276+K01426+K00129+K00274+K00838+K00815
Glycerophospholipid metabolism	16	353	214	8798	0.0163	0.225167	1.86344	ko00564	Metabolism	Lipid metabolism	CGLO_02035;CGLO_09326;CGLO_15347;CGLO_17253;CGLO_01133;CGLO_02924;CGLO_06735;CGLO_00905;CGLO_04016;CGLO_05056;CGLO_14291;CGLO_05005;CGLO_17701;CGLO_07476;CGLO_08714;CGLO_16084	K01613+K18693+K06123+K06130+K18696+K13513+K13523+K00866+K13535
Tyrosine metabolism	16	353	241	8798	0.04023	0.2682	1.65467	ko00350	Metabolism	Amino acid metabolism	CGLO_13772;CGLO_07909;CGLO_15228;CGLO_06231;CGLO_17265;CGLO_06778;CGLO_04556;CGLO_04207;CGLO_11166;CGLO_07308;CGLO_06155;CGLO_09559;CGLO_08735;CGLO_02309;CGLO_17434;CGLO_02509	K00451+K02510+K00276+K00129+K00274+K00838+K00505+K00450+K00815+K00135+K13953
Starch and sucrose metabolism	15	353	213	8798	0.03052	0.234769	1.75518	ko00500	Metabolism	Carbohydrate metabolism	CGLO_04319;CGLO_07445;CGLO_08851;CGLO_16777;CGLO_04951;CGLO_03982;CGLO_03546;CGLO_03156;CGLO_08852;CGLO_12490;CGLO_09724;CGLO_13382;CGLO_03274;CGLO_15407;CGLO_01393	K00706+K00688+K01176+K01210+K01199+K00750+K01194+K01179+K05349
Glycerolipid metabolism	14	353	140	8798	0.002464	0.0821333	2.49235	ko00561	Metabolism	Lipid metabolism	CGLO_09326;CGLO_09146;CGLO_17847;CGLO_14429;CGLO_06735;CGLO_12112;CGLO_14713;CGLO_05482;CGLO_14107;CGLO_00802;CGLO_14291;CGLO_07709;CGLO_17470;CGLO_04263	K18693+K14458+K01046+K17900+K18097+K00002+K13513+K13523+K07407+K00128
Peroxisome	14	353	226	8798	0.0807	0.390773	1.54393	ko04146	Cellular Processes	Transport and catabolism	CGLO_12599;CGLO_01573;CGLO_03511;CGLO_07623;CGLO_05106;CGLO_16316;CGLO_06199;CGLO_09939;CGLO_16501;CGLO_04828;CGLO_01678;CGLO_16530;CGLO_02304;CGLO_13035	K13336+K01897+K00306+K08726+K00624
Biosynthesis of amino acids	14	353	332	8798	0.4664	0.899815	1.05099	ko01230	Metabolism	Global and overview maps	CGLO_05580;CGLO_11350;CGLO_01048;CGLO_08186;CGLO_12800;CGLO_04556;CGLO_16889;CGLO_09559;CGLO_15553;CGLO_07765;CGLO_16097;CGLO_16502;CGLO_15583;CGLO_14735	K15634+K00831+K00616+K01626+K06001+K00838+K00549+K00815+K01649+K03786+K01738+K00143
Glycolysis / Gluconeogenesis	12	353	152	8798	0.02472	0.225167	1.96765	ko00010	Metabolism	Carbohydrate metabolism	CGLO_05580;CGLO_01573;CGLO_05805;CGLO_17265;CGLO_06155;CGLO_08008;CGLO_05482;CGLO_17470;CGLO_04557;CGLO_04263;CGLO_02509;CGLO_12351	K15634+K01895+K01568+K00129+K00382+K00002+K00128+K13953+K01785
Amino sugar and nucleotide sugar metabolism	12	353	188	8798	0.08597	0.390773	1.59086	ko00520	Metabolism	Carbohydrate metabolism	CGLO_09297;CGLO_04319;CGLO_17897;CGLO_08851;CGLO_16401;CGLO_16777;CGLO_07384;CGLO_04455;CGLO_13789;CGLO_01393;CGLO_13172;CGLO_06679	K01809+K01183+K01784+K01198+K15920
beta-Alanine metabolism	11	353	132	8798	0.02227	0.225167	2.07696	ko00410	Metabolism	Metabolism of other amino acids	CGLO_15228;CGLO_06231;CGLO_17265;CGLO_06155;CGLO_08735;CGLO_02180;CGLO_17434;CGLO_17470;CGLO_04263;CGLO_00126;CGLO_05119	K00276+K00129+K00823+K00128+K00140
Fatty acid degradation	11	353	153	8798	0.05233	0.307824	1.79189	ko00071	Metabolism	Lipid metabolism	CGLO_00460;CGLO_01573;CGLO_07623;CGLO_09939;CGLO_03252;CGLO_04455;CGLO_17470;CGLO_04263;CGLO_02509;CGLO_13172;CGLO_05927	K14338+K01897+K00022+K00128+K13953
Arginine and proline metabolism	11	353	158	8798	0.06228	0.338421	1.73518	ko00330	Metabolism	Amino acid metabolism	CGLO_17877;CGLO_00617;CGLO_12673;CGLO_06778;CGLO_07139;CGLO_11166;CGLO_04848;CGLO_10962;CGLO_17470;CGLO_04263;CGLO_08714	K01259+K01426+K00274+K00128
Meiosis - yeast	11	353	246	8798	0.4057	0.868511	1.11447	ko04113	Cellular Processes	Cell growth and death	CGLO_04439;CGLO_09723;CGLO_09326;CGLO_09041;CGLO_08518;CGLO_15233;CGLO_17576;CGLO_00393;CGLO_07081;CGLO_05511;CGLO_17470	K08139+K02541+K09243+K03114+K02365
Propanoate metabolism	10	353	134	8798	0.05163	0.307824	1.85996	ko00640	Metabolism	Carbohydrate metabolism	CGLO_01573;CGLO_14862;CGLO_15153;CGLO_00436;CGLO_08008;CGLO_13931;CGLO_08582;CGLO_02180;CGLO_00126;CGLO_05119	K01895+K01908+K17741+K00382+K00823+K00140
MAPK signaling pathway - yeast	10	353	228	8798	0.4371	0.8742	1.09314	ko04011	Environmental Information Processing	Signal transduction	CGLO_04319;CGLO_15228;CGLO_08851;CGLO_00436;CGLO_15233;CGLO_13983;CGLO_13931;CGLO_17607;CGLO_17434;CGLO_01393	K00706+K11231+K17741+K03114+K09051+K11230
Autophagy - yeast	10	353	242	8798	0.5098	0.917193	1.0299	ko04138	Cellular Processes	Transport and catabolism	CGLO_16852;CGLO_01316;CGLO_00570;CGLO_05211;CGLO_09041;CGLO_12112;CGLO_01744;CGLO_14107;CGLO_16616;CGLO_00676	K17906+K08329+K01336+K09243+K17900
Aflatoxin biosynthesis	9	353	110	8798	0.04023	0.2682	2.0392	ko00254	Metabolism	Biosynthesis of other secondary metabolites	CGLO_02237;CGLO_14429;CGLO_01887;CGLO_05452;CGLO_03039;CGLO_02036;CGLO_00757;CGLO_17896;CGLO_18117	K17648+K17649+K17645+K17647+K17644
Alanine, aspartate and glutamate metabolism	9	353	171	8798	0.2594	0.682632	1.31176	ko00250	Metabolism	Amino acid metabolism	CGLO_12599;CGLO_03511;CGLO_05106;CGLO_16316;CGLO_01692;CGLO_02309;CGLO_02180;CGLO_04572;CGLO_13035	K01939+K11541+K00135+K00823
Pyruvate metabolism	9	353	187	8798	0.3444	0.80093	1.19953	ko00620	Metabolism	Carbohydrate metabolism	CGLO_01573;CGLO_17495;CGLO_00436;CGLO_08008;CGLO_15553;CGLO_13931;CGLO_04122;CGLO_17470;CGLO_04263	K01895+K01759+K17741+K00382+K01649+K00102+K00128
Thiamine metabolism	8	353	85	8798	0.0268	0.225167	2.34574	ko00730	Metabolism	Metabolism of cofactors and vitamins	CGLO_08949;CGLO_03775;CGLO_13427;CGLO_04455;CGLO_04122;CGLO_06150;CGLO_13172;CGLO_05927	K04487+K01078
Inositol phosphate metabolism	8	353	112	8798	0.09208	0.400348	1.78025	ko00562	Metabolism	Carbohydrate metabolism	CGLO_02542;CGLO_07843;CGLO_06348;CGLO_09515;CGLO_11851;CGLO_00126;CGLO_05119;CGLO_07764	K00010+K00469+K00140+K01092
Lysine degradation	8	353	128	8798	0.1548	0.533793	1.55772	ko00310	Metabolism	Amino acid metabolism	CGLO_03992;CGLO_06199;CGLO_03252;CGLO_02309;CGLO_17470;CGLO_04263;CGLO_16530;CGLO_14735	K01843+K00306+K00022+K00135+K00128+K00143
Fatty acid metabolism	8	353	138	8798	0.2021	0.612424	1.44484	ko01212	Metabolism	Global and overview maps	CGLO_01573;CGLO_07623;CGLO_09939;CGLO_03252;CGLO_05824;CGLO_06625;CGLO_15632;CGLO_05027	K01897+K00022+K00059+K10256+K10703
Aminoacyl-tRNA biosynthesis	8	353	141	8798	0.2174	0.621143	1.4141	ko00970	Genetic Information Processing	Translation	CGLO_06312;CGLO_02864;CGLO_13988;CGLO_04319;CGLO_15335;CGLO_07139;CGLO_09514;CGLO_16669	K01873+K01869+K01881+K01874+K02433
Valine, leucine and isoleucine degradation	8	353	145	8798	0.2384	0.644324	1.37509	ko00280	Metabolism	Amino acid metabolism	CGLO_09792;CGLO_09939;CGLO_03252;CGLO_08008;CGLO_17470;CGLO_04263;CGLO_00126;CGLO_05119	K00020+K18660+K00022+K00382+K00128+K00140
Carbon metabolism	8	353	318	8798	0.9398	0.9958	0.627007	ko01200	Metabolism	Global and overview maps	CGLO_05580;CGLO_01573;CGLO_11350;CGLO_01048;CGLO_08008;CGLO_16502;CGLO_00126;CGLO_05119	K15634+K01895+K00831+K00616+K00382+K01738+K00140
Histidine metabolism	7	353	63	8798	0.01786	0.225167	2.76928	ko00340	Metabolism	Amino acid metabolism	CGLO_08595;CGLO_17265;CGLO_06778;CGLO_11166;CGLO_06155;CGLO_17470;CGLO_04263	K19787+K00129+K00274+K00128
Phenylalanine, tyrosine and tryptophan biosynthesis	7	353	85	8798	0.0643	0.338421	2.05252	ko00400	Metabolism	Amino acid metabolism	CGLO_08186;CGLO_12800;CGLO_04556;CGLO_09559;CGLO_07765;CGLO_16097;CGLO_15583	K01626+K06001+K00838+K00815+K03786
Folate biosynthesis	7	353	103	8798	0.1322	0.48963	1.69383	ko00790	Metabolism	Metabolism of cofactors and vitamins	CGLO_04688;CGLO_07905;CGLO_04319;CGLO_01639;CGLO_08851;CGLO_16777;CGLO_01393	K01930+K03635+K20457
Cyanoamino acid metabolism	7	353	131	8798	0.2835	0.72275	1.33179	ko00460	Metabolism	Metabolism of other amino acids	CGLO_08949;CGLO_02751;CGLO_07948;CGLO_13427;CGLO_02965;CGLO_03274;CGLO_17861	K01501+K10675+K05349
Ascorbate and aldarate metabolism	6	353	52	8798	0.02365	0.225167	2.87579	ko00053	Metabolism	Carbohydrate metabolism	CGLO_07843;CGLO_06348;CGLO_09515;CGLO_11851;CGLO_17470;CGLO_04263	K00469+K00128
Sulfur relay system	6	353	53	8798	0.0255	0.225167	2.82153	ko04122	Genetic Information Processing	Folding, sorting and degradation	CGLO_08949;CGLO_07905;CGLO_03775;CGLO_13427;CGLO_04122;CGLO_06150	K04487+K03635
Steroid biosynthesis	6	353	73	8798	0.08388	0.390773	2.04851	ko00100	Metabolism	Lipid metabolism	CGLO_17897;CGLO_17711;CGLO_12568;CGLO_17679;CGLO_11290;CGLO_11364	K07748+K07750+K01824+K00559
Cell cycle - yeast	6	353	180	8798	0.729	0.9958	0.830784	ko04111	Cellular Processes	Cell growth and death	CGLO_09326;CGLO_00677;CGLO_01133;CGLO_15233;CGLO_04016;CGLO_17470	K02541+K06674+K03114+K02365
Protein processing in endoplasmic reticulum	6	353	185	8798	0.7519	0.9958	0.80833	ko04141	Genetic Information Processing	Folding, sorting and degradation	CGLO_11527;CGLO_13988;CGLO_02333;CGLO_17607;CGLO_13852;CGLO_16669	K09580+K01230+K10839+K13993
Pentose and glucuronate interconversions	6	353	188	8798	0.765	0.9958	0.795431	ko00040	Metabolism	Carbohydrate metabolism	CGLO_02035;CGLO_01133;CGLO_04690;CGLO_14713;CGLO_05482;CGLO_17701	K01051+K18107+K00002
Pyrimidine metabolism	6	353	215	8798	0.8606	0.9958	0.69554	ko00240	Metabolism	Nucleotide metabolism	CGLO_13988;CGLO_12116;CGLO_01692;CGLO_05086;CGLO_04572;CGLO_16669	K02320+K16066+K11541
ABC transporters	5	353	74	8798	0.1888	0.604062	1.68402	ko02010	Environmental Information Processing	Membrane transport	CGLO_02230;CGLO_01284;CGLO_08065;CGLO_09445;CGLO_10683	K05665+K05658+K08711+K05661
Nitrogen metabolism	5	353	80	8798	0.2303	0.639722	1.55772	ko00910	Metabolism	Energy metabolism	CGLO_08949;CGLO_17959;CGLO_07948;CGLO_13427;CGLO_17861	K01501+K17877
Staurosporine biosynthesis	5	353	88	8798	0.2891	0.72275	1.41611	ko00404	Metabolism	Biosynthesis of other secondary metabolites	CGLO_01887;CGLO_13091;CGLO_00757;CGLO_14386;CGLO_14796	K18280+K17475+K18281
Porphyrin and chlorophyll metabolism	5	353	90	8798	0.3043	0.735	1.38464	ko00860	Metabolism	Metabolism of cofactors and vitamins	CGLO_08441;CGLO_04933;CGLO_07751;CGLO_16568;CGLO_06736	K00218+K01772
Fructose and mannose metabolism	5	353	134	8798	0.6266	0.988437	0.929982	ko00051	Metabolism	Carbohydrate metabolism	CGLO_00166;CGLO_08564;CGLO_09297;CGLO_06735;CGLO_08202	K19355+K17742+K01809
Vitamin B6 metabolism	4	353	26	8798	0.02702	0.225167	3.83439	ko00750	Metabolism	Metabolism of cofactors and vitamins	CGLO_11350;CGLO_08999;CGLO_03597;CGLO_05856	K00831+K00275+K05275
Ubiquinone and other terpenoid-quinone biosynthesis	4	353	42	8798	0.1003	0.417917	2.37367	ko00130	Metabolism	Metabolism of cofactors and vitamins	CGLO_05295;CGLO_04556;CGLO_09939;CGLO_09559	K01904+K00838+K00815
Biosynthesis of unsaturated fatty acids	4	353	83	8798	0.4339	0.8742	1.20113	ko01040	Metabolism	Lipid metabolism	CGLO_05824;CGLO_06625;CGLO_15632;CGLO_05027	K00059+K10256+K10703
Fatty acid biosynthesis	4	353	88	8798	0.4768	0.899815	1.13289	ko00061	Metabolism	Lipid metabolism	CGLO_01573;CGLO_07623;CGLO_09939;CGLO_05824	K01897+K00059
Ether lipid metabolism	4	353	89	8798	0.4852	0.899815	1.12016	ko00565	Metabolism	Lipid metabolism	CGLO_17253;CGLO_02924;CGLO_04016;CGLO_07476	K06123
Cysteine and methionine metabolism	4	353	105	8798	0.6112	0.988437	0.949467	ko00270	Metabolism	Amino acid metabolism	CGLO_04556;CGLO_16889;CGLO_09559;CGLO_16502	K00838+K00549+K00815+K01738
Various types of N-glycan biosynthesis	4	353	106	8798	0.6184	0.988437	0.94051	ko00513	Metabolism	Glycan biosynthesis and metabolism	CGLO_13988;CGLO_17607;CGLO_06220;CGLO_16669	K01230+K05528
N-Glycan biosynthesis	4	353	108	8798	0.6326	0.988437	0.923093	ko00510	Metabolism	Glycan biosynthesis and metabolism	CGLO_13988;CGLO_04723;CGLO_17607;CGLO_16669	K01230+K00737
Mitophagy - yeast	4	353	114	8798	0.6731	0.9958	0.874509	ko04139	Cellular Processes	Transport and catabolism	CGLO_15228;CGLO_09041;CGLO_17434;CGLO_00461	K11231+K09243+K08955
Ribosome	4	353	156	8798	0.8708	0.9958	0.639064	ko03010	Genetic Information Processing	Translation	CGLO_15347;CGLO_17253;CGLO_02924;CGLO_04016	K02920
Riboflavin metabolism	3	353	31	8798	0.142	0.507143	2.41195	ko00740	Metabolism	Metabolism of cofactors and vitamins	CGLO_04455;CGLO_13172;CGLO_05927	K01078
Other glycan degradation	3	353	33	8798	0.1605	0.535	2.26577	ko00511	Metabolism	Glycan biosynthesis and metabolism	CGLO_16446;CGLO_02019;CGLO_16573	K01192+K15923
Nicotinate and nicotinamide metabolism	3	353	53	8798	0.3675	0.835227	1.41076	ko00760	Metabolism	Metabolism of cofactors and vitamins	CGLO_00134;CGLO_02309;CGLO_12376	K00767+K00135+K01440
Glutathione metabolism	3	353	68	8798	0.52	0.917193	1.09957	ko00480	Metabolism	Metabolism of other amino acids	CGLO_14348;CGLO_13661;CGLO_04549	K01469+K00799
Galactose metabolism	3	353	75	8798	0.5842	0.988437	0.996941	ko00052	Metabolism	Carbohydrate metabolism	CGLO_17897;CGLO_07709;CGLO_12351	K01784+K07407+K01785
Butanoate metabolism	3	353	79	8798	0.6183	0.988437	0.946463	ko00650	Metabolism	Carbohydrate metabolism	CGLO_03252;CGLO_02309;CGLO_02180	K00022+K00135+K00823
Non-homologous end-joining	3	353	98	8798	0.7536	0.9958	0.762965	ko03450	Genetic Information Processing	Replication and repair	CGLO_04302;CGLO_12116;CGLO_00919	K10981+K10866
Methane metabolism	3	353	101	8798	0.771	0.9958	0.740302	ko00680	Metabolism	Energy metabolism	CGLO_05580;CGLO_01573;CGLO_11350	K15634+K01895+K00831
DNA replication	3	353	108	8798	0.8078	0.9958	0.69232	ko03030	Genetic Information Processing	Replication and repair	CGLO_09326;CGLO_13988;CGLO_16669	K02541+K02320
Spliceosome	3	353	135	8798	0.9062	0.9958	0.553856	ko03040	Genetic Information Processing	Transcription	CGLO_09326;CGLO_06735;CGLO_08597	K12880+K11095
RNA transport	3	353	145	8798	0.9292	0.9958	0.515659	ko03013	Genetic Information Processing	Translation	CGLO_09326;CGLO_15347;CGLO_06735	K12880+K14326
RNA degradation	3	353	204	8798	0.988	0.9958	0.366522	ko03018	Genetic Information Processing	Folding, sorting and degradation	CGLO_06348;CGLO_06625;CGLO_05027	K12586+K12604
Selenocompound metabolism	2	353	19	8798	0.1933	0.604062	2.62353	ko00450	Metabolism	Metabolism of other amino acids	CGLO_15335;CGLO_16889	K01874+K00549
Fatty acid elongation	2	353	27	8798	0.3087	0.735	1.84619	ko00062	Metabolism	Lipid metabolism	CGLO_03252;CGLO_15632	K00022+K10703
Glycosylphosphatidylinositol (GPI)-anchor biosynthesis	2	353	34	8798	0.4071	0.868511	1.46609	ko00563	Metabolism	Glycan biosynthesis and metabolism	CGLO_14291;CGLO_06679	K03857+K03859
Lysine biosynthesis	2	353	40	8798	0.4859	0.899815	1.24618	ko00300	Metabolism	Amino acid metabolism	CGLO_04556;CGLO_14735	K00838+K00143
Sulfur metabolism	2	353	43	8798	0.5228	0.917193	1.15923	ko00920	Metabolism	Energy metabolism	CGLO_00329;CGLO_16502	K00381+K01738
Pantothenate and CoA biosynthesis	2	353	56	8798	0.6612	0.9958	0.890125	ko00770	Metabolism	Metabolism of cofactors and vitamins	CGLO_13438;CGLO_00461	K01598+K00077
Sphingolipid metabolism	2	353	62	8798	0.7133	0.9958	0.803984	ko00600	Metabolism	Lipid metabolism	CGLO_07573;CGLO_07709	K00720+K07407
Nucleotide excision repair	2	353	79	8798	0.8257	0.9958	0.630975	ko03420	Genetic Information Processing	Replication and repair	CGLO_02333;CGLO_15618	K10839+K10610
Ubiquitin mediated proteolysis	2	353	80	8798	0.8309	0.9958	0.623088	ko04120	Genetic Information Processing	Folding, sorting and degradation	CGLO_02180;CGLO_15618	K10590+K10610
2-Oxocarboxylic acid metabolism	2	353	98	8798	0.9032	0.9958	0.508643	ko01210	Metabolism	Global and overview maps	CGLO_04556;CGLO_15553	K00838+K01649
Endocytosis	2	353	123	8798	0.957	0.9958	0.40526	ko04144	Cellular Processes	Transport and catabolism	CGLO_05480;CGLO_17203	K11826+K05747
Oxidative phosphorylation	2	353	124	8798	0.9584	0.9958	0.401992	ko00190	Metabolism	Energy metabolism	CGLO_17959;CGLO_04687	K03885+K02155
Glycosphingolipid biosynthesis - globo and isoglobo series	1	353	13	8798	0.4237	0.8742	1.91719	ko00603	Metabolism	Glycan biosynthesis and metabolism	CGLO_07709	K07407
Penicillin and cephalosporin biosynthesis	1	353	21	8798	0.5796	0.988437	1.18683	ko00311	Metabolism	Biosynthesis of other secondary metabolites	CGLO_01573	K12743
Arachidonic acid metabolism	1	353	28	8798	0.681	0.9958	0.890125	ko00590	Metabolism	Lipid metabolism	CGLO_04828	K08726
Terpenoid backbone biosynthesis	1	353	33	8798	0.7381	0.9958	0.755258	ko00900	Metabolism	Metabolism of terpenoids and polyketides	CGLO_02864	K08658
Valine, leucine and isoleucine biosynthesis	1	353	37	8798	0.7764	0.9958	0.673608	ko00290	Metabolism	Amino acid metabolism	CGLO_15553	K01649
Base excision repair	1	353	45	8798	0.837	0.9958	0.553856	ko03410	Genetic Information Processing	Replication and repair	CGLO_04975	K10773
Proteasome	1	353	50	8798	0.8663	0.9958	0.49847	ko03050	Genetic Information Processing	Folding, sorting and degradation	CGLO_09515	K03062+K03064
Longevity regulating pathway - multiple species	1	353	51	8798	0.8715	0.9958	0.488696	ko04213	Organismal Systems	Aging	CGLO_12376	K01440
Basal transcription factors	1	353	52	8798	0.8764	0.9958	0.479298	ko03022	Genetic Information Processing	Transcription	CGLO_04828	K03124
Phosphatidylinositol signaling system	1	353	55	8798	0.8903	0.9958	0.453155	ko04070	Environmental Information Processing	Signal transduction	CGLO_07764	K01092
Pentose phosphate pathway	1	353	62	8798	0.9168	0.9958	0.401992	ko00030	Metabolism	Carbohydrate metabolism	CGLO_01048	K00616
Biotin metabolism	1	353	65	8798	0.9262	0.9958	0.383439	ko00780	Metabolism	Metabolism of cofactors and vitamins	CGLO_05824	K00059
Citrate cycle (TCA cycle)	1	353	73	8798	0.9462	0.9958	0.341418	ko00020	Metabolism	Carbohydrate metabolism	CGLO_08008	K00382
Phagosome	1	353	76	8798	0.9523	0.9958	0.327941	ko04145	Cellular Processes	Transport and catabolism	CGLO_04687	K02155
Homologous recombination	1	353	92	8798	0.9747	0.9958	0.270908	ko03440	Genetic Information Processing	Replication and repair	CGLO_12116	K10866
mRNA surveillance pathway	1	353	107	8798	0.9861	0.9958	0.23293	ko03015	Genetic Information Processing	Translation	CGLO_15347	K14326
Glyoxylate and dicarboxylate metabolism	1	353	108	8798	0.9866	0.9958	0.230773	ko00630	Metabolism	Carbohydrate metabolism	CGLO_08008	K00382
Ribosome biogenesis in eukaryotes	1	353	137	8798	0.9958	0.9958	0.181923	ko03008	Genetic Information Processing	Translation	CGLO_06370	K14556
