# Supplementary material for: CgGCS, Encoding a Glucosylceramide Synthase, Is Required for Growth, Conidiation and Pathogenicity in Colletotrichum gloeosporioides
Source: Front Microbiol. 2019 May 21;10:1016. doi: 10.3389/fmicb.2019.01016 (PMC6536669; doi:10.3389/fmicb.2019.01016)
Supplement: FILE S3 — Detailed information of gene expression between WT and mutant strain. [file Table_4.xlsx]

## Sheet: File S3 M-VS-W.GeneDiffExp
Supplementar File S3 Detailed information of gene expression between WT and mutant strain
GeneID	Means-M	Means-W	log2FC(W/M)	Up-Down-Regulation(W/M)	FDR	length	transcript_id(s)	NR-ID	NR-Annot	KEGG-ID	KEGG-Annot	GO-BP	GO-CC	GO-MF
CGLO_06345	6.433	5.5613	-0.210072	Down	0.94343	903	EQB53900	gi|530473470|gb|EQB53900.1|	PhlG protein [Colletotrichum gloeosporioides Cg-14]	--	--	GO:0008152 metabolic process	GO:0016787 hydrolase activity	--
CGLO_04984	48.7653	33.6012	-0.537341	Down	0.710966	939	EQB55115	gi|530474967|gb|EQB55115.1|	hypothetical protein CGLO_04984 [Colletotrichum gloeosporioides Cg-14]	cot:CORT_0E01030	Ymr226c protein; K16066 3-hydroxy acid dehydrogenase / malonic semialdehyde reductase [EC:1.1.1.381 1.1.1.-]	GO:0055114 oxidation-reduction process	GO:0016491 oxidoreductase activity	--
CGLO_02996	475.143	405.975	-0.226973	Down	0.838162	1041	EQB56945	gi|530477374|gb|EQB56945.1|	hypothetical protein CGLO_02996 [Colletotrichum gloeosporioides Cg-14]	maj:MAA_05655	Cys-Gly metallodipeptidase dug1; K15428 Cys-Gly metallodipeptidase DUG1 [EC:3.4.13.-]	--	--	--
CGLO_09560	696.961	852.302	0.290287	Up	0.857668	1692	EQB50957	gi|530469885|gb|EQB50957.1|	MOSC domain-containing protein [Colletotrichum gloeosporioides Cg-14]	cmt:CCM_08124	Amphiphysin-like protein; K12562 amphiphysin	GO:0032259 methylation | GO:0055114 oxidation-reduction process	GO:0030170 pyridoxal phosphate binding | GO:0016491 oxidoreductase activity | GO:0030151 molybdenum ion binding | GO:0009055 electron carrier activity | GO:0051537 2 iron, 2 sulfur cluster binding | GO:0008168 methyltransferase activity	--
CGLO_17787	0.182066	0.169018	-0.107279	Down	0.94343	1242	EQB43543	gi|530460151|gb|EQB43543.1|	hypothetical protein CGLO_17787 [Colletotrichum gloeosporioides Cg-14]	nhe:NECHADRAFT_78539	hypothetical protein; K07407 alpha-galactosidase [EC:3.2.1.22]	GO:0005975 carbohydrate metabolic process	GO:0052692 raffinose alpha-galactosidase activity	GO:0016021 integral component of membrane
CGLO_13113	0.595487	0.648958	0.124055	Up	0.94343	1566	EQB47726	gi|530465730|gb|EQB47726.1|	hypothetical protein CGLO_13113 [Colletotrichum gloeosporioides Cg-14]	ela:UCREL1_8805	putative general substrate transporter protein; K01487 guanine deaminase [EC:3.5.4.3]	GO:0055085 transmembrane transport | GO:0008643 carbohydrate transport	GO:0022857 transmembrane transporter activity	GO:0016021 integral component of membrane
CGLO_07379	1.14622	2.09901	0.872827	Up	0.474331	849	EQB52961	gi|530472330|gb|EQB52961.1|	hypothetical protein CGLO_07379 [Colletotrichum gloeosporioides Cg-14]	--	--	--	--	--
CGLO_01273	123.737	91.4219	-0.436662	Down	0.556273	1017	EQB58481	gi|530479248|gb|EQB58481.1|	FolB domain-containing protein [Colletotrichum gloeosporioides Cg-14]	--	--	GO:0006760 folic acid-containing compound metabolic process	GO:0004150 dihydroneopterin aldolase activity	--
CGLO_17059	137.641	122.092	-0.172944	Down	0.892475	705	EQB44213	gi|530461006|gb|EQB44213.1|	orotate phosphoribosyltransferase [Colletotrichum gloeosporioides Cg-14]	smp:SMAC_01699	hypothetical protein; K00762 orotate phosphoribosyltransferase [EC:2.4.2.10]	GO:0006207 'de novo' pyrimidine nucleobase biosynthetic process | GO:0009116 nucleoside metabolic process | GO:0006221 pyrimidine nucleotide biosynthetic process	GO:0004588 orotate phosphoribosyltransferase activity	GO:0005829 cytosol
CGLO_15739	0.795885	0.813692	0.0319221	Up	0.979526	1485	EQB45394	gi|530462511|gb|EQB45394.1|	major facilitator superfamily transporter [Colletotrichum gloeosporioides Cg-14]	ssl:SS1G_02048	hypothetical protein; K08157 MFS transporter, DHA1 family, multidrug resistance protein	GO:0055085 transmembrane transport	--	GO:0016021 integral component of membrane
CGLO_08711	0.45798	0.474198	0.0502046	Up	0.968093	1035	EQB51727	gi|530470823|gb|EQB51727.1|	NAD dependent epimerase/dehydratase [Colletotrichum gloeosporioides Cg-14]	ctp:CTRG_01886	similar to potential oxidoreductase; K17741 NADPH-dependent methylglyoxal reductase [EC:1.1.1.283]	GO:0006694 steroid biosynthetic process | GO:0055114 oxidation-reduction process	GO:0050662 coenzyme binding | GO:0003854 3-beta-hydroxy-delta5-steroid dehydrogenase activity	--
CGLO_12714	4.31713	7.76826	0.84752	Up	0.597603	1428	EQB48089	gi|530466214|gb|EQB48089.1|	hypothetical protein CGLO_12714 [Colletotrichum gloeosporioides Cg-14]	maw:MAC_01085	transthyretin domain protein; K07127 5-hydroxyisourate hydrolase [EC:3.5.2.17]	GO:0008152 metabolic process	GO:0016758 transferase activity, transferring hexosyl groups	--
CGLO_12017	9.0968	4.96939	-0.872289	Down	0.578686	1662	EQB48717	gi|530467019|gb|EQB48717.1|	carboxylesterase [Colletotrichum gloeosporioides Cg-14]	afm:AFUA_8G04210	triacylglycerol lipase; K01050 cholinesterase [EC:3.1.1.8]	--	--	--
CGLO_13251	30.9414	85.5483	1.4672	Up	0.140921	1185	EQB47581	gi|530465544|gb|EQB47581.1|	O-methyltransferase [Colletotrichum gloeosporioides Cg-14]	afv:AFLA_139220	aflO/ omtB/ dmtA/ O-methyltransferase B; K17649 demethylsterigmatocystin 6-O-methyltransferase [EC:2.1.1.109]	GO:0032259 methylation	GO:0008171 O-methyltransferase activity	--
CGLO_14940	5.30921	10.832	1.02873	Up	0.41279	1011	EQB46070	gi|530463377|gb|EQB46070.1|	hypothetical protein CGLO_14940 [Colletotrichum gloeosporioides Cg-14]	--	--	GO:0006357 regulation of transcription from RNA polymerase II promoter	GO:0000981 RNA polymerase II transcription factor activity, sequence-specific DNA binding | GO:0008270 zinc ion binding	GO:0005634 nucleus
CGLO_10605	201.539	161.018	-0.323837	Down	0.65599	720	EQB50012	gi|530468695|gb|EQB50012.1|	hypothetical protein CGLO_10605 [Colletotrichum gloeosporioides Cg-14]	--	--	--	--	GO:0016021 integral component of membrane
CGLO_18375	22.2063	29.4187	0.405759	Up	0.81036	1767	EQB43057	gi|530459392|gb|EQB43057.1|	hypothetical protein CGLO_18375 [Colletotrichum gloeosporioides Cg-14]	pte:PTT_17808	hypothetical protein; K19564 choline transport protein	GO:0003333 amino acid transmembrane transport	GO:0015171 amino acid transmembrane transporter activity	GO:0016021 integral component of membrane
CGLO_04782	4.77533	8.57561	0.844639	Up	0.591049	1074	EQB55306	gi|530475196|gb|EQB55306.1|	hypothetical protein CGLO_04782 [Colletotrichum gloeosporioides Cg-14]	--	--	--	--	--
CGLO_12883	1.8295	1.50687	-0.279897	Down	0.92419	3354	EQB47944	gi|530466011|gb|EQB47944.1|	hypothetical protein CGLO_12883 [Colletotrichum gloeosporioides Cg-14]	--	--	--	--	--
CGLO_15488	278.674	165.207	-0.754307	Down	0.465948	1353	EQB45615	gi|530462787|gb|EQB45615.1|	mandelate racemase/muconate lactonizing enzyme domain-containing protein [Colletotrichum gloeosporioides Cg-14]	tmn:UCRPA7_4700	putative l-galactonate dehydratase protein; K18102 L-galactonate dehydratase [EC:4.2.1.146]	GO:0009063 cellular amino acid catabolic process	GO:0003824 catalytic activity	--
CGLO_16809	0.338184	0.331873	-0.0271774	Down	0.979526	438	EQB44442	gi|530461298|gb|EQB44442.1|	LysM domain-containing protein [Colletotrichum gloeosporioides Cg-14]	--	--	--	--	--
CGLO_13982	52.7283	17.0731	-1.62686	Down	0.0916159	1083	EQB46923	gi|530464581|gb|EQB46923.1|	hypothetical protein CGLO_13982 [Colletotrichum gloeosporioides Cg-14]	--	--	--	--	GO:0016021 integral component of membrane
CGLO_04059	0.833663	1.04171	0.321418	Up	0.882334	1404	EQB55955	gi|530475982|gb|EQB55955.1|	hypothetical protein CGLO_04059 [Colletotrichum gloeosporioides Cg-14]	--	--	GO:0055114 oxidation-reduction process	GO:0050660 flavin adenine dinucleotide binding | GO:0016614 oxidoreductase activity, acting on CH-OH group of donors	--
CGLO_08292	0.2796	0.306607	0.133025	Up	0.938616	300	EQB52104	gi|530471293|gb|EQB52104.1|	hypothetical protein CGLO_08292 [Colletotrichum gloeosporioides Cg-14]	--	--	--	--	--
CGLO_06172	19.4579	13.9739	-0.477622	Down	0.800019	432	EQB54039	gi|530473651|gb|EQB54039.1|	integral membrane protein [Colletotrichum gloeosporioides Cg-14]	cthr:CTHT_0069440	hypothetical protein; K00587 protein-S-isoprenylcysteine O-methyltransferase [EC:2.1.1.100]	--	--	GO:0016021 integral component of membrane
CGLO_06401	391.153	361.685	-0.113001	Down	0.938616	3069	EQB53841	gi|530473396|gb|EQB53841.1|	hypothetical protein CGLO_06401 [Colletotrichum gloeosporioides Cg-14]	vda:VDAG_03775	F-box/WD repeat-containing protein 1A; K03362 F-box and WD-40 domain protein 1/11	--	--	--
CGLO_11497	3282.78	3750.65	0.192221	Up	0.764821	2211	EQB49204	gi|530467665|gb|EQB49204.1|	hypothetical protein CGLO_11497 [Colletotrichum gloeosporioides Cg-14]	tmn:UCRPA7_183	putative heat shock protein 60 protein; K04077 chaperonin GroEL	GO:0042026 protein refolding | GO:0045041 protein import into mitochondrial intermembrane space | GO:0050821 protein stabilization | GO:0051604 protein maturation | GO:0006458 'de novo' protein folding | GO:0051131 chaperone-mediated protein complex assembly	GO:0051087 chaperone binding | GO:0005524 ATP binding | GO:0003688 DNA replication origin binding | GO:0016887 ATPase activity | GO:0003779 actin binding | GO:0003697 single-stranded DNA binding | GO:0051082 unfolded protein binding	GO:0042645 mitochondrial nucleoid
CGLO_05295	11.5581	36.9341	1.67605	Up	0.0333802	1731	EQB54835	gi|530474641|gb|EQB54835.1|	AMP-binding enzyme [Colletotrichum gloeosporioides Cg-14]	afm:AFUA_1G13110	4-coumarate-CoA ligase; K01904 4-coumarate--CoA ligase [EC:6.2.1.12]	GO:0008152 metabolic process	GO:0016874 ligase activity	GO:0016020 membrane
CGLO_11844	0.277161	0.303932	0.133025	Up	0.938616	831	EQB48877	gi|530467235|gb|EQB48877.1|	hypothetical protein CGLO_11844 [Colletotrichum gloeosporioides Cg-14]	--	--	--	--	--
CGLO_15509	93.4605	86.8419	-0.105966	Down	0.939537	1131	EQB45589	gi|530462753|gb|EQB45589.1|	hypothetical protein CGLO_15509 [Colletotrichum gloeosporioides Cg-14]	vda:VDAG_04071	conidiophore development protein hymA; K08272 calcium binding protein 39	GO:0008360 regulation of cell shape | GO:0006355 regulation of transcription, DNA-templated | GO:0007118 budding cell apical bud growth	--	GO:0043332 mating projection tip | GO:0005933 cellular bud | GO:0000131 incipient cellular bud site
CGLO_09870	405.465	387.146	-0.0666999	Down	0.966181	3153	EQB50669	gi|530469536|gb|EQB50669.1|	peptidase M16 inactive domain-containing protein [Colletotrichum gloeosporioides Cg-14]	mpr:MPER_01349	hypothetical protein ; K06972 presequence protease [EC:3.4.24.-]	GO:0006508 proteolysis	GO:0046872 metal ion binding | GO:0008237 metallopeptidase activity	GO:0005737 cytoplasm
CGLO_00690	2723.96	1727.61	-0.656932	Down	0.0310588	6387	EQB58984	gi|530479876|gb|EQB58984.1|	hypothetical protein CGLO_00690 [Colletotrichum gloeosporioides Cg-14]	--	--	--	GO:0003677 DNA binding	GO:0005634 nucleus
CGLO_13008	47.2984	55.2691	0.224682	Up	0.894026	744	EQB47823	gi|530465863|gb|EQB47823.1|	hypothetical protein CGLO_13008 [Colletotrichum gloeosporioides Cg-14]	vda:VDAG_02472	hypothetical protein; K14784 protein CMS1	--	--	--
CGLO_05018	1109.37	3880.37	1.80646	Up	1.07e-06	537	EQB55078	gi|530474924|gb|EQB55078.1|	hypothetical protein CGLO_05018 [Colletotrichum gloeosporioides Cg-14]	--	--	--	--	--
CGLO_17608	0.149666	0.155258	0.0529239	Up	0.966181	1515	EQB43718	gi|530460382|gb|EQB43718.1|	isotrichodermin C-15 hydroxylase [Colletotrichum gloeosporioides Cg-14]	pan:PODANSg8563	hypothetical protein; K17645 averantin hydroxylase [EC:1.14.13.174]	GO:0055114 oxidation-reduction process	GO:0020037 heme binding | GO:0016705 oxidoreductase activity, acting on paired donors, with incorporation or reduction of molecular oxygen | GO:0004497 monooxygenase activity | GO:0005506 iron ion binding	GO:0016021 integral component of membrane
CGLO_15433	68.5673	49.5184	-0.469557	Down	0.723857	1164	EQB45659	gi|530462839|gb|EQB45659.1|	homogentisate 1,2-dioxygenase [Colletotrichum gloeosporioides Cg-14]	pfj:MYCFIDRAFT_37377	hypothetical protein; K00451 homogentisate 1,2-dioxygenase [EC:1.13.11.5]	GO:0006559 L-phenylalanine catabolic process | GO:0055114 oxidation-reduction process | GO:0006570 tyrosine metabolic process	GO:0004411 homogentisate 1,2-dioxygenase activity	--
CGLO_15717	696.836	357.065	-0.964633	Down	0.145347	645	EQB45412	gi|530462533|gb|EQB45412.1|	hypothetical protein CGLO_15717 [Colletotrichum gloeosporioides Cg-14]	--	--	--	--	--
CGLO_12194	1.61257	1.70777	0.0827538	Up	0.968673	1674	EQB48566	gi|530466834|gb|EQB48566.1|	hypothetical protein CGLO_12194 [Colletotrichum gloeosporioides Cg-14]	--	--	--	--	--
CGLO_07766	9.37331	9.53972	0.0253872	Up	0.98633	1056	EQB52598	gi|596707654|ref|XP_007283793.1|	3-dehydroshikimate dehydratase [Colletotrichum gloeosporioides Nara gc5] >gi|429851998|gb|ELA27154.1| 3-dehydroshikimate dehydratase [Colletotrichum gloeosporioides Nara gc5]	vda:VDAG_08174	3-dehydroshikimate dehydratase; K00457 4-hydroxyphenylpyruvate dioxygenase [EC:1.13.11.27]	--	--	--
CGLO_10323	171.456	185.56	0.114052	Up	0.923356	1848	EQB50250	gi|530469006|gb|EQB50250.1|	hypothetical protein CGLO_10323 [Colletotrichum gloeosporioides Cg-14]	--	--	GO:0006468 protein phosphorylation	GO:0004672 protein kinase activity | GO:0005524 ATP binding	--
CGLO_02525	3.55749	5.26372	0.565224	Up	0.811469	1143	EQB57363	gi|530477905|gb|EQB57363.1|	TfdA family Taurine catabolism dioxygenase TauD [Colletotrichum gloeosporioides Cg-14]	tmn:UCRPA7_7101	putative alpha-ketoglutarate-dependent taurine dioxygenase protein; K19245 sulfonate dioxygenase [EC:1.14.11.-]	GO:0055114 oxidation-reduction process	GO:0051213 dioxygenase activity	--
CGLO_07897	2.38003	2.23401	-0.0913399	Down	0.966181	1257	EQB52470	gi|530471732|gb|EQB52470.1|	hypothetical protein CGLO_07897 [Colletotrichum gloeosporioides Cg-14]	--	--	--	--	--
CGLO_12742	40.1473	22.8406	-0.813704	Down	0.235542	1431	EQB48046	gi|530466160|gb|EQB48046.1|	glycosyl hydrolase family 71 [Colletotrichum gloeosporioides Cg-14]	ani:AN8252.2	hypothetical protein; K01268 aminopeptidase I [EC:3.4.11.22]	GO:0008152 metabolic process	GO:0016787 hydrolase activity	--
CGLO_09553	0.149666	0.155258	0.0529239	Up	0.966181	1458	EQB50950	gi|530469878|gb|EQB50950.1|	hypothetical protein CGLO_09553 [Colletotrichum gloeosporioides Cg-14]	pte:PTT_15510	hypothetical protein; K00485 dimethylaniline monooxygenase (N-oxide forming) [EC:1.14.13.8]	GO:0055114 oxidation-reduction process	GO:0050660 flavin adenine dinucleotide binding | GO:0004499 N,N-dimethylaniline monooxygenase activity | GO:0050661 NADP binding	--
CGLO_07321	2.67841	2.70409	0.013765	Up	0.992587	1434	EQB53002	gi|530472379|gb|EQB53002.1|	hypothetical protein CGLO_07321 [Colletotrichum gloeosporioides Cg-14]	--	--	--	--	GO:0016021 integral component of membrane
CGLO_10595	37.598	39.882	0.0850822	Up	0.966181	1746	EQB50002	gi|530468685|gb|EQB50002.1|	carboxylesterase [Colletotrichum gloeosporioides Cg-14]	afm:AFUA_7G01180	extracellular lipase; K01046 triacylglycerol lipase [EC:3.1.1.3]	GO:0008152 metabolic process	GO:0016787 hydrolase activity	--
CGLO_03319	2.46568	1.94258	-0.344013	Down	0.902858	3288	EQB56655	gi|530477027|gb|EQB56655.1|	glycosyl hydrolase family 38 domain-containing protein [Colletotrichum gloeosporioides Cg-14]	mgr:MGG_12735	alpha-mannosidase; K01191 alpha-mannosidase [EC:3.2.1.24]	GO:0006013 mannose metabolic process | GO:0055085 transmembrane transport	GO:0004559 alpha-mannosidase activity | GO:0030246 carbohydrate binding | GO:0008270 zinc ion binding	GO:0016021 integral component of membrane
CGLO_09143	1484.36	1268.43	-0.226801	Down	0.670493	1029	EQB51328	gi|530470332|gb|EQB51328.1|	hypothetical protein CGLO_09143 [Colletotrichum gloeosporioides Cg-14]	--	--	--	--	--
CGLO_03740	258.46	250.791	-0.0434523	Down	0.966181	1497	EQB56269	gi|530476358|gb|EQB56269.1|	hypothetical protein CGLO_03740 [Colletotrichum gloeosporioides Cg-14]	nhe:NECHADRAFT_51976	hypothetical protein; K03448 MFS transporter, ACS family, pantothenate transporter	GO:0055085 transmembrane transport	--	GO:0016021 integral component of membrane
CGLO_10436	0.990672	0.95594	-0.0514868	Down	0.975796	1053	EQB50145	gi|530468876|gb|EQB50145.1|	integral membrane protein [Colletotrichum gloeosporioides Cg-14]	--	--	--	--	GO:0016021 integral component of membrane
CGLO_01828	9.7825	6.25196	-0.645895	Down	0.705372	2649	EQB57986	gi|530478657|gb|EQB57986.1|	hypothetical protein CGLO_01828 [Colletotrichum gloeosporioides Cg-14]	aor:AOR_1_564094	AO090120000322; hypothetical protein; K10777 DNA ligase 4 [EC:6.5.1.1]	GO:0006355 regulation of transcription, DNA-templated	GO:0008270 zinc ion binding | GO:0003677 DNA binding | GO:0003824 catalytic activity	GO:0005634 nucleus
CGLO_11800	4.37891	5.89551	0.429044	Up	0.875234	519	EQB48924	gi|530467302|gb|EQB48924.1|	NUDIX domain-containing protein [Colletotrichum gloeosporioides Cg-14]	cmt:CCM_06786	AvaB protein; K20183 Vam6/Vps39-like protein vacuolar protein sorting-associated protein 39	GO:0008152 metabolic process	GO:0016787 hydrolase activity	--
CGLO_14697	349.953	373.186	0.0927343	Up	0.938616	891	EQB46266	gi|530463642|gb|EQB46266.1|	hypothetical protein CGLO_14697 [Colletotrichum gloeosporioides Cg-14]	fpu:FPSE_02859	hypothetical protein; K01426 amidase [EC:3.5.1.4]	--	--	--
CGLO_15365	171.467	123.522	-0.473165	Down	0.45949	1050	EQB45725	gi|530462917|gb|EQB45725.1|	hypothetical protein CGLO_15365 [Colletotrichum gloeosporioides Cg-14]	--	--	--	--	--
CGLO_06358	37.2103	42.7388	0.199843	Up	0.912617	2427	EQB53880	gi|530473446|gb|EQB53880.1|	hypothetical protein CGLO_06358 [Colletotrichum gloeosporioides Cg-14]	--	--	GO:0006351 transcription, DNA-templated	GO:0003677 DNA binding | GO:0008270 zinc ion binding	GO:0005634 nucleus
CGLO_08772	48.3672	39.437	-0.294478	Down	0.835814	1137	EQB51667	gi|530470754|gb|EQB51667.1|	hypothetical protein CGLO_08772 [Colletotrichum gloeosporioides Cg-14]	uma:UMAG_03035	hypothetical protein; K17878 nicotinamide N-methyltransferase [EC:2.1.1.1]	GO:0018023 peptidyl-lysine trimethylation	GO:0016279 protein-lysine N-methyltransferase activity	--
CGLO_15444	37.2585	80.2787	1.10745	Up	0.213312	3978	EQB45642	gi|530462821|gb|EQB45642.1|	hypothetical protein CGLO_15444 [Colletotrichum gloeosporioides Cg-14]	cim:CIMG_00780	multidrug resistance protein; K05658 ATP-binding cassette, subfamily B (MDR/TAP), member 1 [EC:3.6.3.44]	GO:0055085 transmembrane transport | GO:0008152 metabolic process	GO:0042626 ATPase activity, coupled to transmembrane movement of substances | GO:0005524 ATP binding	GO:0016021 integral component of membrane
CGLO_09686	14.4211	92.3168	2.67842	Up	3.56e-06	843	EQB50835	gi|530469737|gb|EQB50835.1|	hypothetical protein CGLO_09686 [Colletotrichum gloeosporioides Cg-14]	ztr:MYCGRDRAFT_109073	hypothetical protein; K15165 mediator of RNA polymerase II transcription subunit 13, fungi type	--	--	GO:0016021 integral component of membrane
CGLO_00615	11.1432	13.5943	0.286839	Up	0.911115	2214	EQB59055	gi|530479962|gb|EQB59055.1|	hypothetical protein CGLO_00615 [Colletotrichum gloeosporioides Cg-14]	mbe:MBM_04883	phospho-2-dehydro-3-deoxyheptonate aldolase; K01626 3-deoxy-7-phosphoheptulonate synthase [EC:2.5.1.54]	--	--	GO:0016021 integral component of membrane
CGLO_06132	209.078	195.517	-0.0967477	Down	0.966181	1482	EQB54081	gi|530473703|gb|EQB54081.1|	hypothetical protein CGLO_06132 [Colletotrichum gloeosporioides Cg-14]	--	--	--	--	--
CGLO_13684	0.2796	0.306607	0.133025	Up	0.938616	3069	EQB47197	gi|530464992|gb|EQB47197.1|	hypothetical protein CGLO_13684 [Colletotrichum gloeosporioides Cg-14]	mrr:Moror_12793	hypothetical protein; K11870 ubiquitin carboxyl-terminal hydrolase 1 [EC:3.4.19.12]	--	--	--
CGLO_02530	33.2795	32.1332	-0.0505685	Down	0.97519	705	EQB57368	gi|530477910|gb|EQB57368.1|	hypothetical protein CGLO_02530 [Colletotrichum gloeosporioides Cg-14]	--	--	GO:0006351 transcription, DNA-templated	GO:0003677 DNA binding | GO:0008270 zinc ion binding	GO:0005634 nucleus
CGLO_01804	46.3428	62.4295	0.429882	Up	0.713302	1101	EQB58000	gi|530478677|gb|EQB58000.1|	hypothetical protein CGLO_01804 [Colletotrichum gloeosporioides Cg-14]	vda:VDAG_04214	MNN9 protein; K05529 mannan polymerase complexes MNN9 subunit [EC:2.4.1.-]	GO:0070317 negative regulation of G0 to G1 transition | GO:0097502 mannosylation | GO:0006487 protein N-linked glycosylation	GO:0000009 alpha-1,6-mannosyltransferase activity	GO:0000136 alpha-1,6-mannosyltransferase complex | GO:0005801 cis-Golgi network | GO:0005783 endoplasmic reticulum
CGLO_06271	95.6305	128.468	0.425872	Up	0.677911	663	EQB53950	gi|530473537|gb|EQB53950.1|	hypothetical protein CGLO_06271 [Colletotrichum gloeosporioides Cg-14]	tmn:UCRPA7_4568	putative endoplasmic reticulum vesicle protein 25 protein; K20352 p24 family protein delta-1	GO:0006888 ER to Golgi vesicle-mediated transport	--	GO:0030134 ER to Golgi transport vesicle | GO:0016021 integral component of membrane | GO:0005783 endoplasmic reticulum
CGLO_07354	1.3403	1.96769	0.553947	Up	0.745437	1755	EQB52985	gi|530472358|gb|EQB52985.1|	hypothetical protein CGLO_07354 [Colletotrichum gloeosporioides Cg-14]	afm:AFUA_1G17190	long-chain-fatty-acid-CoA ligase; K01897 long-chain acyl-CoA synthetase [EC:6.2.1.3]	GO:0008152 metabolic process	GO:0016874 ligase activity	--
CGLO_17058	428.337	475.063	0.149371	Up	0.902858	1977	EQB44212	gi|530461005|gb|EQB44212.1|	nucleolar GTP-binding protein 1 [Colletotrichum gloeosporioides Cg-14]	tre:TRIREDRAFT_55766	hypothetical protein; K06943 nucleolar GTP-binding protein	GO:0000054 ribosomal subunit export from nucleus | GO:1902626 assembly of large subunit precursor of preribosome | GO:0006364 rRNA processing | GO:0042273 ribosomal large subunit biogenesis	GO:0005525 GTP binding	GO:0072686 mitotic spindle | GO:0005730 nucleolus | GO:0030687 preribosome, large subunit precursor
CGLO_16755	442.685	723.685	0.709082	Up	0.398158	1221	EQB44496	gi|530461366|gb|EQB44496.1|	glycosyl hydrolase family 18 [Colletotrichum gloeosporioides Cg-14]	tre:TRIREDRAFT_59082	chi18-2; glycoside hydrolase family 18, chitinase; K01183 chitinase [EC:3.2.1.14]	GO:0005975 carbohydrate metabolic process | GO:0006032 chitin catabolic process	GO:0004568 chitinase activity	GO:0016021 integral component of membrane
CGLO_08771	1273.95	1274.46	0.00058255	Up	0.999363	408	EQB51666	gi|596720555|ref|XP_007286144.1|	40s ribosomal protein s24 [Colletotrichum gloeosporioides Nara gc5] >gi|429849408|gb|ELA24801.1| 40s ribosomal protein s24 [Colletotrichum gloeosporioides Nara gc5] >gi|530470753|gb|EQB51666.1| ribosomal protein S24e [Colletotrichum gloeosporioides Cg-14]	tmn:UCRPA7_266	putative 40s ribosomal protein s24 protein; K02974 small subunit ribosomal protein S24e	GO:0006412 translation	GO:0003735 structural constituent of ribosome | GO:0000166 nucleotide binding	GO:0005840 ribosome
CGLO_04526	433.005	330.927	-0.387871	Down	0.564658	1065	EQB55544	gi|530475484|gb|EQB55544.1|	hypothetical protein CGLO_04526 [Colletotrichum gloeosporioides Cg-14]	nfi:NFIA_001560	hypothetical protein; K15385 aspyridone synthetase trans-acting enoyl reductase	GO:0055114 oxidation-reduction process	GO:0008270 zinc ion binding | GO:0016491 oxidoreductase activity	--
CGLO_06705	698.884	566.103	-0.30399	Down	0.564821	3378	EQB53559	gi|530473067|gb|EQB53559.1|	hypothetical protein CGLO_06705 [Colletotrichum gloeosporioides Cg-14]	fpu:FPSE_04767	hypothetical protein; K17974 protein JSN1	--	GO:0000166 nucleotide binding | GO:0003723 RNA binding	--
CGLO_00948	17.8098	13.6108	-0.387912	Down	0.861425	1041	EQB58756	gi|530479597|gb|EQB58756.1|	hypothetical protein CGLO_00948 [Colletotrichum gloeosporioides Cg-14]	--	--	GO:0006413 translational initiation	GO:0003743 translation initiation factor activity	--
CGLO_15055	61.76	48.5285	-0.347841	Down	0.752365	1374	EQB45983	gi|530463262|gb|EQB45983.1|	nucleotide sugar dehydrogenase [Colletotrichum gloeosporioides Cg-14]	--	--	GO:0000271 polysaccharide biosynthetic process | GO:0055114 oxidation-reduction process	GO:0016628 oxidoreductase activity, acting on the CH-CH group of donors, NAD or NADP as acceptor | GO:0051287 NAD binding | GO:0003979 UDP-glucose 6-dehydrogenase activity	--
CGLO_13217	4.37929	3.1994	-0.452896	Down	0.86169	3885	EQB47621	gi|530465593|gb|EQB47621.1|	hypothetical protein CGLO_13217 [Colletotrichum gloeosporioides Cg-14]	npa:UCRNP2_3877	putative serine protease protein; K01336 cerevisin [EC:3.4.21.48]	GO:0006508 proteolysis	GO:0004252 serine-type endopeptidase activity	--
CGLO_01455	9.30425	9.67453	0.0563006	Up	0.976736	1650	EQB58306	gi|530479046|gb|EQB58306.1|	transketolase [Colletotrichum gloeosporioides Cg-14]	val:VDBG_01162	dihydroxyacetone synthase; K17100 dihydroxyacetone synthase [EC:2.2.1.3]	GO:0008152 metabolic process	GO:0004802 transketolase activity	--
CGLO_04052	5308.03	5447.2	0.0373378	Up	0.966181	960	EQB55961	gi|530475989|gb|EQB55961.1|	hypothetical protein CGLO_04052 [Colletotrichum gloeosporioides Cg-14]	tmn:UCRPA7_8192	putative mitochondrial phosphate carrier protein; K15102 solute carrier family 25 (mitochondrial phosphate transporter), member 3	GO:0035435 phosphate ion transmembrane transport	GO:0005315 inorganic phosphate transmembrane transporter activity	GO:0031305 integral component of mitochondrial inner membrane
CGLO_13649	25.1201	37.8171	0.590195	Up	0.602341	1455	EQB47226	gi|530465032|gb|EQB47226.1|	major facilitator superfamily transporter [Colletotrichum gloeosporioides Cg-14]	bor:COCMIDRAFT_105365	hypothetical protein; K01939 adenylosuccinate synthase [EC:6.3.4.4]	GO:0055085 transmembrane transport	--	GO:0016021 integral component of membrane
CGLO_00521	46.2372	89.5042	0.952903	Up	0.455307	2061	EQB59129	gi|530480053|gb|EQB59129.1|	hypothetical protein CGLO_00521 [Colletotrichum gloeosporioides Cg-14]	--	--	--	--	GO:0016021 integral component of membrane
CGLO_02487	18.0648	16.4117	-0.138453	Down	0.952517	945	EQB57391	gi|530477941|gb|EQB57391.1|	hypothetical protein CGLO_02487 [Colletotrichum gloeosporioides Cg-14]	--	--	--	--	GO:0016021 integral component of membrane
CGLO_01364	230.264	120.477	-0.934525	Down	0.524012	1266	EQB58389	gi|530479140|gb|EQB58389.1|	hypothetical protein CGLO_01364 [Colletotrichum gloeosporioides Cg-14]	nhe:NECHADRAFT_65446	hypothetical protein; K09580 protein disulfide-isomerase A1 [EC:5.3.4.1]	GO:0055114 oxidation-reduction process	GO:0016491 oxidoreductase activity | GO:0010181 FMN binding	--
CGLO_10702	794.734	813.632	0.0339044	Up	0.968673	387	EQB49914	gi|596716807|ref|XP_007285434.1|	60s ribosomal protein l22 [Colletotrichum gloeosporioides Nara gc5] >gi|429850219|gb|ELA25513.1| 60s ribosomal protein l22 [Colletotrichum gloeosporioides Nara gc5] >gi|530468573|gb|EQB49914.1| ribosomal L22e family protein [Colletotrichum gloeosporioides Cg-14]	tmn:UCRPA7_1586	putative 60s ribosomal protein l22 protein; K02891 large subunit ribosomal protein L22e	GO:0006412 translation	GO:0003735 structural constituent of ribosome	GO:0005840 ribosome
CGLO_08352	1461.45	3834.1	1.39149	Up	2.55e-05	1887	EQB52044	gi|530471216|gb|EQB52044.1|	multicopper oxidase [Colletotrichum gloeosporioides Cg-14]	tre:TRIREDRAFT_102820	ferroxidase-like protein; K19791 iron transport multicopper oxidase	GO:0055114 oxidation-reduction process	GO:0005507 copper ion binding | GO:0016491 oxidoreductase activity	GO:0016021 integral component of membrane
CGLO_12554	0.189351	0.175782	-0.107279	Down	0.94343	345	EQB48233	gi|530466407|gb|EQB48233.1|	hypothetical protein CGLO_12554 [Colletotrichum gloeosporioides Cg-14]	--	--	--	--	--
CGLO_14221	0.388812	0.341454	-0.18738	Down	0.902858	444	EQB46696	gi|530464262|gb|EQB46696.1|	hypothetical protein CGLO_14221 [Colletotrichum gloeosporioides Cg-14]	--	--	GO:0008152 metabolic process	GO:0016740 transferase activity	--
CGLO_09466	48.2836	51.7706	0.100602	Up	0.96078	819	EQB51028	gi|530469975|gb|EQB51028.1|	hypothetical protein CGLO_09466 [Colletotrichum gloeosporioides Cg-14]	kla:KLLA0F18106g	hypothetical protein; K08157 MFS transporter, DHA1 family, multidrug resistance protein	GO:0055085 transmembrane transport	--	GO:0016021 integral component of membrane
CGLO_00850	314.022	292.681	-0.101536	Down	0.94343	1164	EQB58847	gi|530479706|gb|EQB58847.1|	hypothetical protein CGLO_00850 [Colletotrichum gloeosporioides Cg-14]	--	--	--	--	--
CGLO_13349	1970.13	2864.2	0.539838	Up	0.351546	1011	EQB47494	gi|530465413|gb|EQB47494.1|	SUR7 protein [Colletotrichum gloeosporioides Cg-14]	mbe:MBM_09269	calcineurin-like phosphoesterase; K06269 serine/threonine-protein phosphatase PP1 catalytic subunit [EC:3.1.3.16]	--	--	GO:0016021 integral component of membrane | GO:0005886 plasma membrane
CGLO_04185	0.626866	0.502671	-0.318542	Down	0.834738	807	EQB55846	gi|530475846|gb|EQB55846.1|	hypothetical protein CGLO_04185 [Colletotrichum gloeosporioides Cg-14]	ela:UCREL1_1132	putative ribonuclease h protein; K03469 ribonuclease HI [EC:3.1.26.4]	GO:0090502 RNA phosphodiester bond hydrolysis, endonucleolytic	GO:0004523 RNA-DNA hybrid ribonuclease activity | GO:0003676 nucleic acid binding	--
CGLO_00705	0.285238	0.312789	0.133025	Up	0.938616	2019	EQB58975	gi|530479864|gb|EQB58975.1|	hypothetical protein CGLO_00705 [Colletotrichum gloeosporioides Cg-14]	--	--	GO:0006355 regulation of transcription, DNA-templated	GO:0046872 metal ion binding	GO:0016020 membrane
CGLO_00473	182.872	192.32	0.0726755	Up	0.966181	1164	EQB59176	gi|530480111|gb|EQB59176.1|	hypothetical protein CGLO_00473 [Colletotrichum gloeosporioides Cg-14]	vda:VDAG_04443	Mni1p; K18803 protein-histidine N-methyltransferase [EC:2.1.1.85]	GO:0042038 peptidyl-histidine methylation, to form tele-methylhistidine	GO:0018064 protein-histidine N-methyltransferase activity	--
CGLO_07971	83.1262	68.2747	-0.283952	Down	0.902858	555	EQB52406	gi|530471656|gb|EQB52406.1|	hypothetical protein CGLO_07971 [Colletotrichum gloeosporioides Cg-14]	--	--	GO:0055114 oxidation-reduction process	GO:0016491 oxidoreductase activity	--
CGLO_06521	12.0269	12.5158	0.0574774	Up	0.979526	990	EQB53730	gi|530473265|gb|EQB53730.1|	hypothetical protein CGLO_06521 [Colletotrichum gloeosporioides Cg-14]	ure:UREG_00738	hypothetical protein; K12584 m7GpppX diphosphatase [EC:3.6.1.59]	GO:0032259 methylation	GO:0008168 methyltransferase activity	--
CGLO_09585	26.5225	28.885	0.123103	Up	0.954772	1374	EQB50939	gi|530469866|gb|EQB50939.1|	heterokaryon incompatibility protein [Colletotrichum gloeosporioides Cg-14]	npa:UCRNP2_890	putative leucyl-trna synthetase protein; K01869 leucyl-tRNA synthetase [EC:6.1.1.4]	--	--	--
CGLO_17884	11.2089	100.995	3.17156	Up	3.42e-13	1266	EQB43454	gi|530460030|gb|EQB43454.1|	hypothetical protein CGLO_17884 [Colletotrichum gloeosporioides Cg-14]	--	--	--	--	--
CGLO_04991	83.8735	50.1721	-0.741329	Down	0.615069	480	EQB55107	gi|530474958|gb|EQB55107.1|	hypothetical protein CGLO_04991 [Colletotrichum gloeosporioides Cg-14]	--	--	--	--	--
CGLO_01889	2.56051	2.98339	0.22052	Up	0.94343	579	EQB57936	gi|530478600|gb|EQB57936.1|	hypothetical protein CGLO_01889 [Colletotrichum gloeosporioides Cg-14]	--	--	GO:0019441 tryptophan catabolic process to kynurenine	GO:0004061 arylformamidase activity	--
CGLO_09929	1.40665	1.31343	-0.0989289	Down	0.966181	1365	EQB50614	gi|530469466|gb|EQB50614.1|	hypothetical protein CGLO_09929 [Colletotrichum gloeosporioides Cg-14]	--	--	--	--	--
CGLO_08627	17.5472	29.6064	0.754669	Up	0.533879	2235	EQB51789	gi|530470899|gb|EQB51789.1|	hypothetical protein CGLO_08627 [Colletotrichum gloeosporioides Cg-14]	pno:SNOG_13460	hypothetical protein; K00688 glycogen phosphorylase [EC:2.4.1.1]	--	--	--
CGLO_08991	29.7163	35.3197	0.24922	Up	0.902858	1383	EQB51463	gi|530470501|gb|EQB51463.1|	UbiD family decarboxylase [Colletotrichum gloeosporioides Cg-14]	pte:PTT_12604	hypothetical protein; K03854 mannosyltransferase [EC:2.4.1.-]	--	--	--
CGLO_14269	2.44831	1.65366	-0.566123	Down	0.782612	879	EQB46637	gi|530464185|gb|EQB46637.1|	hypothetical protein CGLO_14269 [Colletotrichum gloeosporioides Cg-14]	--	--	--	--	GO:0016021 integral component of membrane
CGLO_08912	180.806	178.604	-0.017679	Down	0.985284	2655	EQB51532	gi|530470584|gb|EQB51532.1|	high-temperature-induced dauer-formation protein [Colletotrichum gloeosporioides Cg-14]	--	--	--	--	--
CGLO_03687	41.2902	33.5049	-0.301428	Down	0.8603	1032	EQB56309	gi|530476406|gb|EQB56309.1|	hypothetical protein CGLO_03687 [Colletotrichum gloeosporioides Cg-14]	--	--	--	--	--
CGLO_06702	1817.44	973.768	-0.900261	Down	0.10227	648	EQB53556	gi|530473064|gb|EQB53556.1|	hypothetical protein CGLO_06702 [Colletotrichum gloeosporioides Cg-14]	pno:SNOG_01979	hypothetical protein; K10877 DNA repair and recombination protein RAD54B [EC:3.6.4.-]	GO:0008152 metabolic process	GO:0003824 catalytic activity	--
CGLO_01793	68.6026	71.7602	0.0649192	Up	0.966181	1905	EQB58012	gi|530478690|gb|EQB58012.1|	nucleoporin protein Ndc1-Nup [Colletotrichum gloeosporioides Cg-14]	vda:VDAG_07497	nuclear envelope protein; K14315 nucleoporin NDC1	GO:0090307 mitotic spindle assembly | GO:0071790 establishment of spindle pole body localization to nuclear envelope	GO:0043495 protein anchor	GO:0016021 integral component of membrane | GO:0031965 nuclear membrane | GO:0005643 nuclear pore | GO:0019031 viral envelope | GO:0044732 mitotic spindle pole body | GO:0005783 endoplasmic reticulum
CGLO_04929	17.0899	16.1558	-0.0810976	Down	0.967698	1314	EQB55170	gi|530475031|gb|EQB55170.1|	hypothetical protein CGLO_04929 [Colletotrichum gloeosporioides Cg-14]	--	--	--	--	--
CGLO_04827	1.5338	4.38896	1.51676	Up	0.127292	1488	EQB55264	gi|530475144|gb|EQB55264.1|	multicopper oxidase [Colletotrichum gloeosporioides Cg-14]	mrr:Moror_5607	laccase; K19791 iron transport multicopper oxidase	GO:0055114 oxidation-reduction process	GO:0016491 oxidoreductase activity | GO:0005507 copper ion binding	--
CGLO_00370	9223.6	4692.57	-0.974952	Down	0.0230879	1587	EQB59273	gi|530480227|gb|EQB59273.1|	pyruvate kinase [Colletotrichum gloeosporioides Cg-14]	vda:VDAG_01206	pyruvate kinase; K00873 pyruvate kinase [EC:2.7.1.40]	GO:0042866 pyruvate biosynthetic process | GO:0061621 canonical glycolysis	GO:0030955 potassium ion binding | GO:0004743 pyruvate kinase activity | GO:0000287 magnesium ion binding | GO:0016301 kinase activity	GO:0005829 cytosol
CGLO_14665	0.528038	0.648525	0.296521	Up	0.853363	798	EQB46297	gi|530463696|gb|EQB46297.1|	hypothetical protein CGLO_14665 [Colletotrichum gloeosporioides Cg-14]	cgi:CGB_E2350C	nuclear mRNA splicing, via spliceosome-related protein; K13115 coiled-coil domain-containing protein 130	--	--	--
CGLO_00842	3.33929	2.13937	-0.642355	Down	0.740843	501	EQB58849	gi|530479710|gb|EQB58849.1|	hypothetical protein CGLO_00842 [Colletotrichum gloeosporioides Cg-14]	--	--	--	--	--
CGLO_17219	8.7985	7.69656	-0.193045	Down	0.94343	636	EQB44067	gi|530460814|gb|EQB44067.1|	hypothetical protein CGLO_17219 [Colletotrichum gloeosporioides Cg-14]	--	--	--	--	--
CGLO_08349	253.046	208.846	-0.276963	Down	0.776698	1620	EQB52041	gi|530471213|gb|EQB52041.1|	hypothetical protein CGLO_08349 [Colletotrichum gloeosporioides Cg-14]	vda:VDAG_07016	protein phosphatase 1K; K19708 protein phosphatase PTC6 [EC:3.1.3.16 3.1.3.43]	GO:0016236 macroautophagy | GO:0006470 protein dephosphorylation | GO:0043085 positive regulation of catalytic activity | GO:0000422 mitophagy	GO:0046872 metal ion binding | GO:0004722 protein serine/threonine phosphatase activity	GO:0005758 mitochondrial intermembrane space | GO:0005759 mitochondrial matrix
CGLO_09132	9.37279	11.6019	0.307806	Up	0.920329	1527	EQB51336	gi|530470342|gb|EQB51336.1|	major facilitator superfamily transporter [Colletotrichum gloeosporioides Cg-14]	afv:AFLA_048740	MFS transporter, putative; K13336 peroxin-3	GO:0055085 transmembrane transport	--	GO:0016021 integral component of membrane | GO:0005783 endoplasmic reticulum
CGLO_12700	25.9919	40.4407	0.637747	Up	0.557601	984	EQB48092	gi|530466220|gb|EQB48092.1|	dioxygenase [Colletotrichum gloeosporioides Cg-14]	cthr:CTHT_0025080	catechol 1,2-dioxygenase-like protein; K03381 catechol 1,2-dioxygenase [EC:1.13.11.1]	GO:0009712 catechol-containing compound metabolic process | GO:0055114 oxidation-reduction process	GO:0018576 catechol 1,2-dioxygenase activity | GO:0008199 ferric iron binding	--
CGLO_01593	473.599	548.456	0.211709	Up	0.772819	2856	EQB58178	gi|530478893|gb|EQB58178.1|	adaptor complexes medium subunit family protein [Colletotrichum gloeosporioides Cg-14]	maw:MAC_03868	malonyl CoA-acyl carrier protein transacylase; K00645 [acyl-carrier-protein] S-malonyltransferase [EC:2.3.1.39]	GO:0016192 vesicle-mediated transport | GO:0006886 intracellular protein transport | GO:0008152 metabolic process	GO:0016740 transferase activity	GO:0030131 clathrin adaptor complex
CGLO_04302	2.04581	10.5918	2.37221	Up	0.00408227	2523	EQB55739	gi|530475716|gb|EQB55739.1|	hypothetical protein CGLO_04302 [Colletotrichum gloeosporioides Cg-14]	aor:AOR_1_1366054	AO090011000816; hypothetical protein; K10981 DNA polymerase IV [EC:2.7.7.7]	--	--	GO:0016021 integral component of membrane
CGLO_01302	6.5905	14.7492	1.16218	Up	0.251082	486	EQB58453	gi|530479215|gb|EQB58453.1|	hypothetical protein CGLO_01302 [Colletotrichum gloeosporioides Cg-14]	--	--	--	--	--
CGLO_16179	2124.7	1786.1	-0.25045	Down	0.719507	2208	EQB45004	gi|530462019|gb|EQB45004.1|	hypothetical protein CGLO_16179 [Colletotrichum gloeosporioides Cg-14]	--	--	--	GO:0008270 zinc ion binding	GO:0016021 integral component of membrane
CGLO_13808	1.13652	1.15493	0.0231751	Up	0.985932	615	EQB47083	gi|530464827|gb|EQB47083.1|	PAP2 superfamily protein [Colletotrichum gloeosporioides Cg-14]	--	--	--	--	--
CGLO_08143	17.7825	9.79133	-0.860883	Down	0.420929	1473	EQB52246	gi|530471466|gb|EQB52246.1|	hypothetical protein CGLO_08143 [Colletotrichum gloeosporioides Cg-14]	fgr:FGSG_00085	hypothetical protein; K03448 MFS transporter, ACS family, pantothenate transporter	GO:0055085 transmembrane transport	--	GO:0016021 integral component of membrane
CGLO_10235	8.77131	5.91144	-0.569282	Down	0.81061	336	EQB50335	gi|530469106|gb|EQB50335.1|	hypothetical protein CGLO_10235 [Colletotrichum gloeosporioides Cg-14]	--	--	--	--	--
CGLO_09288	1.10848	0.887873	-0.32016	Down	0.832158	2052	EQB51192	gi|530470175|gb|EQB51192.1|	cytochrome P450 [Colletotrichum gloeosporioides Cg-14]	npa:UCRNP2_4359	putative cytochrome p450 protein; K21293 cytochrome P450 family 619	GO:0055114 oxidation-reduction process | GO:0006355 regulation of transcription, DNA-templated	GO:0008270 zinc ion binding | GO:0016705 oxidoreductase activity, acting on paired donors, with incorporation or reduction of molecular oxygen | GO:0003677 DNA binding | GO:0004497 monooxygenase activity | GO:0020037 heme binding | GO:0005506 iron ion binding	GO:0016020 membrane | GO:0005634 nucleus
CGLO_01703	48.2061	50.2548	0.0600456	Up	0.966181	801	EQB58091	gi|530478783|gb|EQB58091.1|	WW domain binding protein 11 [Colletotrichum gloeosporioides Cg-14]	val:VDBG_01738	phosphopantothenate-cysteine ligase; K01922 phosphopantothenate-cysteine ligase [EC:6.3.2.5]	GO:0042254 ribosome biogenesis | GO:0001522 pseudouridine synthesis | GO:0006396 RNA processing	--	GO:0031429 box H/ACA snoRNP complex
CGLO_06077	27.0711	50.8224	0.908712	Up	0.267691	1005	EQB54127	gi|530473760|gb|EQB54127.1|	hypothetical protein CGLO_06077 [Colletotrichum gloeosporioides Cg-14]	cmt:CCM_02605	sedoheptulose-1,7-bisphosphatase; K01100 sedoheptulose-bisphosphatase [EC:3.1.3.37]	GO:0016311 dephosphorylation | GO:0005975 carbohydrate metabolic process | GO:0055085 transmembrane transport	GO:0042132 fructose 1,6-bisphosphate 1-phosphatase activity	GO:0016021 integral component of membrane
CGLO_04541	17.8628	13.6555	-0.387475	Down	0.871203	1359	EQB55520	gi|530475456|gb|EQB55520.1|	heterokaryon incompatibility protein [Colletotrichum gloeosporioides Cg-14]	--	--	--	--	--
CGLO_09093	216.005	162.057	-0.414559	Down	0.430338	2400	EQB51374	gi|530470387|gb|EQB51374.1|	elongation factor Tu GTP binding domain-containing protein [Colletotrichum gloeosporioides Cg-14]	vda:VDAG_05517	elongation factor 1-alpha; K14416 elongation factor 1 alpha-like protein	GO:0032790 ribosome disassembly | GO:0070966 nuclear-transcribed mRNA catabolic process, no-go decay | GO:0070651 nonfunctional rRNA decay | GO:0006414 translational elongation | GO:0045727 positive regulation of translation	GO:0003746 translation elongation factor activity | GO:0003924 GTPase activity | GO:0005525 GTP binding	GO:1990533 Dom34-Hbs1 complex
CGLO_11947	182.504	166.486	-0.132528	Down	0.939537	981	EQB48792	gi|530467112|gb|EQB48792.1|	hypothetical protein CGLO_11947 [Colletotrichum gloeosporioides Cg-14]	--	--	--	--	--
CGLO_04644	245.686	291.39	0.246133	Up	0.839454	1353	EQB55434	gi|530475351|gb|EQB55434.1|	CS domain-containing protein [Colletotrichum gloeosporioides Cg-14]	smp:SMAC_03192	hypothetical protein; K12795 suppressor of G2 allele of SKP1	GO:0019933 cAMP-mediated signaling | GO:0019219 regulation of nucleobase-containing compound metabolic process | GO:0034654 nucleobase-containing compound biosynthetic process | GO:0051382 kinetochore assembly | GO:0031326 regulation of cellular biosynthetic process	GO:0051087 chaperone binding | GO:0030674 protein binding, bridging	GO:0000151 ubiquitin ligase complex
CGLO_17901	1.90069	3.37006	0.826248	Up	0.497032	1638	EQB43446	gi|530460018|gb|EQB43446.1|	hypothetical protein CGLO_17901 [Colletotrichum gloeosporioides Cg-14]	bor:COCMIDRAFT_91778	hypothetical protein; K08139 MFS transporter, SP family, sugar:H+ symporter	GO:0055085 transmembrane transport	GO:0022891 substrate-specific transmembrane transporter activity	GO:0016021 integral component of membrane
CGLO_01371	104.551	115.421	0.1427	Up	0.920714	1725	EQB58396	gi|530479147|gb|EQB58396.1|	transmembrane amino acid transporter [Colletotrichum gloeosporioides Cg-14]	tmn:UCRPA7_4484	putative vacuolar amino acid transporter 2 protein; K14997 solute carrier family 38 (sodium-coupled neutral amino acid transporter), member 11	--	--	GO:0016021 integral component of membrane | GO:0005783 endoplasmic reticulum
CGLO_11012	2.24024	1.71402	-0.38627	Down	0.888586	1023	EQB49614	gi|530468184|gb|EQB49614.1|	hypothetical protein CGLO_11012 [Colletotrichum gloeosporioides Cg-14]	--	--	GO:0008152 metabolic process	GO:0050662 coenzyme binding | GO:0003824 catalytic activity	--
CGLO_12759	1.0419	0.860111	-0.276617	Down	0.890127	1542	EQB48063	gi|530466177|gb|EQB48063.1|	allantoinase [Colletotrichum gloeosporioides Cg-14]	npa:UCRNP2_3299	putative allantoinase protein; K01466 allantoinase [EC:3.5.2.5]	GO:0006259 DNA metabolic process | GO:0000256 allantoin catabolic process	GO:0004038 allantoinase activity | GO:0050897 cobalt ion binding | GO:0016888 endodeoxyribonuclease activity, producing 5'-phosphomonoesters | GO:0008270 zinc ion binding	--
CGLO_02799	160.041	235.725	0.558663	Up	0.349184	2088	EQB57123	gi|530477607|gb|EQB57123.1|	hypothetical protein CGLO_02799 [Colletotrichum gloeosporioides Cg-14]	--	--	--	--	--
CGLO_02651	2859.94	4404.69	0.623055	Up	0.436495	1287	EQB57233	gi|530477744|gb|EQB57233.1|	NADH:flavin oxidoreductase/NADH oxidase [Colletotrichum gloeosporioides Cg-14]	nhe:NECHADRAFT_65446	hypothetical protein; K09580 protein disulfide-isomerase A1 [EC:5.3.4.1]	GO:0055114 oxidation-reduction process	GO:0016491 oxidoreductase activity | GO:0010181 FMN binding	--
CGLO_02552	171.379	239.729	0.484215	Up	0.549613	1083	EQB57327	gi|530477867|gb|EQB57327.1|	hypothetical protein CGLO_02552 [Colletotrichum gloeosporioides Cg-14]	--	--	GO:0009306 protein secretion | GO:0006888 ER to Golgi vesicle-mediated transport	--	GO:0032153 cell division site | GO:0005829 cytosol | GO:0051286 cell tip | GO:0000139 Golgi membrane | GO:0030127 COPII vesicle coat | GO:0005801 cis-Golgi network | GO:0005634 nucleus
CGLO_07587	569.366	499.261	-0.189562	Down	0.83176	594	EQB52760	gi|530472095|gb|EQB52760.1|	synaptobrevin [Colletotrichum gloeosporioides Cg-14]	fpu:FPSE_05838	hypothetical protein; K08516 synaptobrevin homolog YKT6	GO:0006906 vesicle fusion | GO:0006891 intra-Golgi vesicle-mediated transport | GO:0042144 vacuole fusion, non-autophagic | GO:0006888 ER to Golgi vesicle-mediated transport | GO:0008152 metabolic process	GO:0016409 palmitoyltransferase activity | GO:0005484 SNAP receptor activity	GO:0005829 cytosol | GO:0016021 integral component of membrane | GO:0000324 fungal-type vacuole | GO:0005739 mitochondrion | GO:0005768 endosome | GO:0031201 SNARE complex | GO:0005794 Golgi apparatus | GO:0005634 nucleus
CGLO_04680	0.462813	0.485971	0.0704405	Up	0.966181	1725	EQB55395	gi|530475304|gb|EQB55395.1|	hypothetical protein CGLO_04680 [Colletotrichum gloeosporioides Cg-14]	spaa:SPAPADRAFT_60453	hypothetical protein; K17741 NADPH-dependent methylglyoxal reductase [EC:1.1.1.283]	GO:0016106 sesquiterpenoid biosynthetic process	GO:0045482 trichodiene synthase activity | GO:0050662 coenzyme binding	--
CGLO_17464	75.8901	103.211	0.443613	Up	0.556273	1305	EQB43839	gi|530460534|gb|EQB43839.1|	prolyl-tRNA synthetase [Colletotrichum gloeosporioides Cg-14]	nte:NEUTE1DRAFT91576	NEUTE1DRAFT_91576; hypothetical protein; K01881 prolyl-tRNA synthetase [EC:6.1.1.15]	GO:0006433 prolyl-tRNA aminoacylation	GO:0004827 proline-tRNA ligase activity | GO:0005524 ATP binding	GO:0005737 cytoplasm
CGLO_01149	72.0002	89.998	0.321891	Up	0.82444	1104	EQB58598	gi|530479394|gb|EQB58598.1|	hypothetical protein CGLO_01149 [Colletotrichum gloeosporioides Cg-14]	nhe:NECHADRAFT_56564	hypothetical protein; K20498 D-serine ammonia-lyase [EC:4.3.1.18]	--	--	--
CGLO_02152	19.4834	12.9271	-0.591841	Down	0.753703	2484	EQB57685	gi|530478306|gb|EQB57685.1|	hypothetical protein CGLO_02152 [Colletotrichum gloeosporioides Cg-14]	afv:AFLA_027810	alkaline serine protease Alp1; K18549 oryzin [EC:3.4.21.63]	GO:0006508 proteolysis	GO:0004252 serine-type endopeptidase activity	--
CGLO_01083	258.268	272.442	0.0770782	Up	0.945522	5532	EQB58647	gi|530479462|gb|EQB58647.1|	hypothetical protein CGLO_01083 [Colletotrichum gloeosporioides Cg-14]	afv:AFLA_005130	L-lysine 2,3-aminomutase, putative; K01843 lysine 2,3-aminomutase [EC:5.4.3.2]	GO:0032259 methylation | GO:0032543 mitochondrial translation	GO:0003735 structural constituent of ribosome | GO:0008168 methyltransferase activity	GO:0016021 integral component of membrane | GO:0005763 mitochondrial small ribosomal subunit
CGLO_00768	634.94	535.754	-0.24505	Down	0.817598	612	EQB58924	gi|530479801|gb|EQB58924.1|	hypothetical protein CGLO_00768 [Colletotrichum gloeosporioides Cg-14]	mbe:MBM_03912	peptide methionine sulfoxide; K07304 peptide-methionine (S)-S-oxide reductase [EC:1.8.4.11]	GO:0034599 cellular response to oxidative stress | GO:0030091 protein repair | GO:0055114 oxidation-reduction process	GO:0008113 peptide-methionine (S)-S-oxide reductase activity	GO:0005737 cytoplasm | GO:0005634 nucleus
CGLO_13104	65.0608	76.7293	0.237989	Up	0.853363	1302	EQB47717	gi|530465721|gb|EQB47717.1|	C-x8-C-x5-C-x3-H type zinc finger protein [Colletotrichum gloeosporioides Cg-14]	--	--	--	GO:0046872 metal ion binding	--
CGLO_02308	1.25787	1.07864	-0.221773	Down	0.918297	960	EQB57551	gi|530478134|gb|EQB57551.1|	hypothetical protein CGLO_02308 [Colletotrichum gloeosporioides Cg-14]	--	--	--	--	--
CGLO_08106	15.9841	20.0991	0.330494	Up	0.866434	882	EQB52297	gi|530471524|gb|EQB52297.1|	amidohydrolase [Colletotrichum gloeosporioides Cg-14]	--	--	GO:0008152 metabolic process	GO:0016787 hydrolase activity	--
CGLO_00867	109.929	72.6084	-0.598368	Down	0.388182	1035	EQB58829	gi|530479684|gb|EQB58829.1|	hypothetical protein CGLO_00867 [Colletotrichum gloeosporioides Cg-14]	--	--	GO:0016226 iron-sulfur cluster assembly	GO:0051536 iron-sulfur cluster binding	GO:0016020 membrane | GO:0005829 cytosol
CGLO_02977	63.1978	61.5537	-0.0380294	Down	0.974418	909	EQB56962	gi|530477397|gb|EQB56962.1|	hypothetical protein CGLO_02977 [Colletotrichum gloeosporioides Cg-14]	--	--	--	--	GO:0016021 integral component of membrane
CGLO_12827	0.277161	0.303932	0.133025	Up	0.938616	741	EQB47983	gi|530466067|gb|EQB47983.1|	hypothetical protein CGLO_12827 [Colletotrichum gloeosporioides Cg-14]	--	--	GO:0098869 cellular oxidant detoxification	GO:0004601 peroxidase activity	--
CGLO_08243	1.16977	1.17814	0.0102891	Up	0.993994	1038	EQB52166	gi|530471373|gb|EQB52166.1|	glycosyl hydrolase family 61 [Colletotrichum gloeosporioides Cg-14]	afm:AFUA_3G03870	endo-1,4-beta-glucanase; K01179 endoglucanase [EC:3.2.1.4]	GO:0005975 carbohydrate metabolic process	GO:0004553 hydrolase activity, hydrolyzing O-glycosyl compounds | GO:0030248 cellulose binding	GO:0005576 extracellular region
CGLO_02474	3.0375	2.61712	-0.214903	Down	0.94343	1959	EQB57399	gi|530477952|gb|EQB57399.1|	hypothetical protein CGLO_02474 [Colletotrichum gloeosporioides Cg-14]	cdu:CD36_50470	iron transport multicopper oxidase precursor, putative; K19791 iron transport multicopper oxidase	GO:0055114 oxidation-reduction process	GO:0016491 oxidoreductase activity | GO:0005507 copper ion binding	--
CGLO_03377	168.344	161.669	-0.0583676	Down	0.963338	933	EQB56603	gi|530476757|gb|EQB56603.1|	hypothetical protein CGLO_03377 [Colletotrichum gloeosporioides Cg-14]	kla:KLLA0F04455g	hypothetical protein; K06123 1-acylglycerone phosphate reductase [EC:1.1.1.101]	GO:0055114 oxidation-reduction process	GO:0016491 oxidoreductase activity	--
CGLO_15593	8.49796	13.7292	0.692055	Up	0.630493	345	EQB45524	gi|530462675|gb|EQB45524.1|	hypothetical protein CGLO_15593 [Colletotrichum gloeosporioides Cg-14]	ela:UCREL1_8160	putative ubiquitin related modifier 1 protein; K12161 ubiquitin related modifier 1	GO:0007114 cell budding | GO:0002143 tRNA wobble position uridine thiolation | GO:0034599 cellular response to oxidative stress | GO:0001403 invasive growth in response to glucose limitation | GO:0032447 protein urmylation	GO:0031386 protein tag | GO:0042803 protein homodimerization activity	GO:0005829 cytosol
CGLO_13642	737.048	581.955	-0.340851	Down	0.54032	1848	EQB47244	gi|530465052|gb|EQB47244.1|	hypothetical protein CGLO_13642 [Colletotrichum gloeosporioides Cg-14]	--	--	GO:0006355 regulation of transcription, DNA-templated	GO:0003677 DNA binding	--
CGLO_16177	3157.53	2575.9	-0.293724	Down	0.902858	462	EQB45007	gi|596717311|ref|XP_007285528.1|	bys1 domain-containing protein [Colletotrichum gloeosporioides Nara gc5] >gi|429850115|gb|ELA25416.1| bys1 domain-containing protein [Colletotrichum gloeosporioides Nara gc5]	--	--	--	--	--
CGLO_15345	0.695101	0.664774	-0.064359	Down	0.971132	1434	EQB45741	gi|530462938|gb|EQB45741.1|	histidine acid phosphatase [Colletotrichum gloeosporioides Cg-14]	aor:AOR_1_2352154	AO090003001336; histidine acid phosphatase; K01078 acid phosphatase [EC:3.1.3.2]	GO:0016311 dephosphorylation	GO:0003993 acid phosphatase activity	GO:0016021 integral component of membrane
CGLO_12360	25.5153	26.2878	0.0430333	Up	0.975967	483	EQB48411	gi|596711777|ref|XP_007284554.1|	ABC transporter [Colletotrichum gloeosporioides Nara gc5] >gi|429851184|gb|ELA26396.1| ABC transporter [Colletotrichum gloeosporioides Nara gc5]	mgr:MGG_01563	ABC transporter; K05681 ATP-binding cassette, subfamily G (WHITE), member 2	GO:0008152 metabolic process	GO:0016887 ATPase activity | GO:0005524 ATP binding	GO:0016021 integral component of membrane | GO:0005783 endoplasmic reticulum
CGLO_09564	76.4916	59.2189	-0.369246	Down	0.702421	636	EQB50961	gi|530469889|gb|EQB50961.1|	hypothetical protein CGLO_09564 [Colletotrichum gloeosporioides Cg-14]	--	--	GO:0055114 oxidation-reduction process	GO:0050660 flavin adenine dinucleotide binding | GO:0016614 oxidoreductase activity, acting on CH-OH group of donors	--
CGLO_08533	19.7953	18.4648	-0.100376	Down	0.966181	3006	EQB51893	gi|530471026|gb|EQB51893.1|	hypothetical protein CGLO_08533 [Colletotrichum gloeosporioides Cg-14]	--	--	--	--	--
CGLO_09635	52.5173	75.4884	0.523461	Up	0.547593	291	EQB50878	gi|530469795|gb|EQB50878.1|	hypothetical protein CGLO_09635 [Colletotrichum gloeosporioides Cg-14]	--	--	--	--	GO:0016021 integral component of membrane
CGLO_11597	12.8992	7.89858	-0.707612	Down	0.617076	1365	EQB49097	gi|530467533|gb|EQB49097.1|	WD repeat domain-containing protein [Colletotrichum gloeosporioides Cg-14]	--	--	--	--	--
CGLO_02465	12.0144	6.11272	-0.974883	Down	0.455844	441	EQB57429	gi|530477985|gb|EQB57429.1|	hypothetical protein CGLO_02465 [Colletotrichum gloeosporioides Cg-14]	--	--	--	--	--
CGLO_03589	400.579	272.796	-0.554264	Down	0.362371	816	EQB56402	gi|530476519|gb|EQB56402.1|	hypothetical protein CGLO_03589 [Colletotrichum gloeosporioides Cg-14]	--	--	--	--	GO:0016021 integral component of membrane
CGLO_06117	9.76904	11.1898	0.195892	Up	0.94343	648	EQB54086	gi|530473710|gb|EQB54086.1|	DSBA-like thioredoxin domain-containing protein [Colletotrichum gloeosporioides Cg-14]	--	--	GO:0055114 oxidation-reduction process	GO:0015035 protein disulfide oxidoreductase activity	--
CGLO_15678	156.546	236.938	0.59792	Up	0.151436	1392	EQB45465	gi|530462600|gb|EQB45465.1|	hypothetical protein CGLO_15678 [Colletotrichum gloeosporioides Cg-14]	val:VDBG_00071	serine/threonine-protein phosphatase; K04460 serine/threonine-protein phosphatase 5 [EC:3.1.3.16]	GO:0006470 protein dephosphorylation	GO:0004722 protein serine/threonine phosphatase activity	GO:0005737 cytoplasm | GO:0005634 nucleus
CGLO_00255	503.718	514.31	0.0300225	Up	0.979526	924	EQB59367	gi|530480351|gb|EQB59367.1|	hypothetical protein CGLO_00255 [Colletotrichum gloeosporioides Cg-14]	--	--	--	--	GO:0016021 integral component of membrane
CGLO_00785	34.974	131.425	1.90988	Up	0.000949952	888	EQB58901	gi|530479773|gb|EQB58901.1|	hypothetical protein CGLO_00785 [Colletotrichum gloeosporioides Cg-14]	--	--	GO:0032259 methylation	GO:0008168 methyltransferase activity	GO:0016021 integral component of membrane
CGLO_08127	117.156	25.7785	-2.18418	Down	0.00631334	498	EQB52259	gi|530471482|gb|EQB52259.1|	hypothetical protein CGLO_08127 [Colletotrichum gloeosporioides Cg-14]	tms:TREMEDRAFT_63337	hypothetical protein; K11982 E3 ubiquitin-protein ligase RNF115/126 [EC:2.3.2.27]	--	GO:0008270 zinc ion binding	GO:0016021 integral component of membrane
CGLO_02313	273.408	331.488	0.277903	Up	0.699221	1914	EQB57556	gi|530478139|gb|EQB57556.1|	hypothetical protein CGLO_02313 [Colletotrichum gloeosporioides Cg-14]	vda:VDAG_06015	hypothetical protein; K09248 proline utilization trans-activator	GO:0006351 transcription, DNA-templated	GO:0003677 DNA binding | GO:0008270 zinc ion binding	GO:0005634 nucleus
CGLO_08664	106.191	101.72	-0.0620611	Down	0.966181	270	EQB51761	gi|530470865|gb|EQB51761.1|	hypothetical protein CGLO_08664 [Colletotrichum gloeosporioides Cg-14]	maw:MAC_02462	cytochrome c oxidase assembly protein; K18188 protein PET117	--	--	--
CGLO_16473	542.859	323.969	-0.744723	Down	0.188874	1266	EQB44745	gi|530461690|gb|EQB44745.1|	choline/ethanolamine kinase [Colletotrichum gloeosporioides Cg-14]	tmn:UCRPA7_7633	putative ethanolamine kinase protein; K00894 ethanolamine kinase [EC:2.7.1.82]	GO:0016310 phosphorylation	GO:0016301 kinase activity	--
CGLO_09193	1.97379	2.17532	0.14026	Up	0.966181	2343	EQB51274	gi|530470270|gb|EQB51274.1|	hypothetical protein CGLO_09193 [Colletotrichum gloeosporioides Cg-14]	--	--	--	--	GO:0016021 integral component of membrane
CGLO_04255	15.747	27.7682	0.818357	Up	0.404027	834	EQB55797	gi|530475784|gb|EQB55797.1|	hypothetical protein CGLO_04255 [Colletotrichum gloeosporioides Cg-14]	--	--	--	--	--
CGLO_12518	150.552	136.709	-0.139152	Down	0.938616	1419	EQB48267	gi|530466457|gb|EQB48267.1|	hypothetical protein CGLO_12518 [Colletotrichum gloeosporioides Cg-14]	ztr:MYCGRDRAFT_107996	hypothetical protein; K10599 pre-mRNA-processing factor 19 [EC:2.3.2.27]	--	GO:0008270 zinc ion binding	--
CGLO_06763	0.45798	0.474198	0.0502046	Up	0.968093	1032	EQB53515	gi|530473015|gb|EQB53515.1|	hypothetical protein CGLO_06763 [Colletotrichum gloeosporioides Cg-14]	--	--	GO:0055114 oxidation-reduction process	GO:0051287 NAD binding | GO:0016620 oxidoreductase activity, acting on the aldehyde or oxo group of donors, NAD or NADP as acceptor	--
CGLO_03521	155.814	89.2313	-0.804207	Down	0.172947	3141	EQB56447	gi|530476571|gb|EQB56447.1|	hypothetical protein CGLO_03521 [Colletotrichum gloeosporioides Cg-14]	nhe:NECHADRAFT_53367	hypothetical protein; K06978 uncharacterized protein	GO:0006508 proteolysis	GO:0008239 dipeptidyl-peptidase activity	--
CGLO_16399	120.783	98.6786	-0.29161	Down	0.726726	1083	EQB44800	gi|530461765|gb|EQB44800.1|	hypothetical protein CGLO_16399 [Colletotrichum gloeosporioides Cg-14]	--	--	--	--	GO:0016020 membrane
CGLO_03404	27.2225	29.8031	0.130663	Up	0.955848	2154	EQB56578	gi|530476724|gb|EQB56578.1|	hypothetical protein CGLO_03404 [Colletotrichum gloeosporioides Cg-14]	zro:ZYRO0E00572g	hypothetical protein; K09248 proline utilization trans-activator	GO:0006357 regulation of transcription from RNA polymerase II promoter	GO:0008270 zinc ion binding | GO:0000981 RNA polymerase II transcription factor activity, sequence-specific DNA binding | GO:0003677 DNA binding	GO:0005634 nucleus
CGLO_06974	6.68358	4.3855	-0.607879	Down	0.782612	1377	EQB53309	gi|530472770|gb|EQB53309.1|	hypothetical protein CGLO_06974 [Colletotrichum gloeosporioides Cg-14]	--	--	GO:0000710 meiotic mismatch repair	GO:0030983 mismatched DNA binding | GO:0005524 ATP binding | GO:0016887 ATPase activity	GO:0032389 MutLalpha complex
CGLO_16144	699.241	1853.81	1.40663	Up	0.000377255	738	EQB45035	gi|530462055|gb|EQB45035.1|	haloacid dehalogenase-like hydrolase [Colletotrichum gloeosporioides Cg-14]	pno:SNOG_14964	hypothetical protein; K17623 pseudouridine 5'-phosphatase [EC:3.1.3.96]	GO:0008152 metabolic process	GO:0016787 hydrolase activity	--
CGLO_04339	3.7769	3.11715	-0.276975	Down	0.93607	2883	EQB55724	gi|530475697|gb|EQB55724.1|	hypothetical protein CGLO_04339 [Colletotrichum gloeosporioides Cg-14]	mrr:Moror_12793	hypothetical protein; K11870 ubiquitin carboxyl-terminal hydrolase 1 [EC:3.4.19.12]	--	--	--
CGLO_02837	211.379	229.163	0.116543	Up	0.919074	1878	EQB57071	gi|530477544|gb|EQB57071.1|	ubiquitin carboxyl-terminal hydrolase [Colletotrichum gloeosporioides Cg-14]	vda:VDAG_07857	hypothetical protein; K11874 ubiquitin carboxyl-terminal hydrolase 16 [EC:3.4.19.12]	GO:0016579 protein deubiquitination | GO:0006511 ubiquitin-dependent protein catabolic process	GO:0036459 thiol-dependent ubiquitinyl hydrolase activity	GO:0016021 integral component of membrane | GO:0005741 mitochondrial outer membrane
CGLO_13851	459.95	386.283	-0.251819	Down	0.722117	3630	EQB47057	gi|530464785|gb|EQB47057.1|	hypothetical protein CGLO_13851 [Colletotrichum gloeosporioides Cg-14]	--	--	--	--	--
CGLO_15851	9.58895	13.1798	0.458879	Up	0.842371	756	EQB45301	gi|530462391|gb|EQB45301.1|	hypothetical protein CGLO_15851 [Colletotrichum gloeosporioides Cg-14]	--	--	--	--	--
CGLO_12043	53.3131	93.0617	0.803696	Up	0.142855	1092	EQB48688	gi|530466987|gb|EQB48688.1|	hypothetical protein CGLO_12043 [Colletotrichum gloeosporioides Cg-14]	vda:VDAG_08454	splicing factor 3B subunit 4; K12831 splicing factor 3B subunit 4	GO:0000398 mRNA splicing, via spliceosome	GO:0003723 RNA binding | GO:0000166 nucleotide binding	GO:0005686 U2 snRNP | GO:0071004 U2-type prespliceosome | GO:0005829 cytosol
CGLO_13062	4643.32	3792.14	-0.292145	Down	0.700644	1773	EQB47772	gi|530465795|gb|EQB47772.1|	hypothetical protein CGLO_13062 [Colletotrichum gloeosporioides Cg-14]	--	--	--	--	GO:0016021 integral component of membrane
CGLO_15806	621.086	1008.28	0.699034	Up	0.253209	1623	EQB45338	gi|530462438|gb|EQB45338.1|	methylmalonate-semialdehyde dehydrogenase [Colletotrichum gloeosporioides Cg-14]	vda:VDAG_04128	methylmalonate-semialdehyde dehydrogenase; K00140 malonate-semialdehyde dehydrogenase (acetylating) / methylmalonate-semialdehyde dehydrogenase [EC:1.2.1.18 1.2.1.27]	GO:0055114 oxidation-reduction process	GO:0004491 methylmalonate-semialdehyde dehydrogenase (acylating) activity	--
CGLO_14173	581.082	817.846	0.493087	Up	0.394945	873	EQB46753	gi|530464328|gb|EQB46753.1|	phosducin [Colletotrichum gloeosporioides Cg-14]	--	--	--	--	--
CGLO_07543	129.543	89.5746	-0.532273	Down	0.574179	4725	EQB52797	gi|530472140|gb|EQB52797.1|	glycosyl hydrolase family 18 [Colletotrichum gloeosporioides Cg-14]	cmt:CCM_00318	bacteriodes thetaiotaomicron symbiotic chitinase; K01183 chitinase [EC:3.2.1.14]	GO:0005975 carbohydrate metabolic process | GO:0006032 chitin catabolic process	GO:0004568 chitinase activity	--
CGLO_04847	12.4258	12.3282	-0.0113739	Down	0.993581	1743	EQB55244	gi|530475121|gb|EQB55244.1|	amidase [Colletotrichum gloeosporioides Cg-14]	ang:ANI_1_730034	An03g05880; general amidase-B; K01426 amidase [EC:3.5.1.4]	GO:0008152 metabolic process	GO:0016787 hydrolase activity | GO:0016884 carbon-nitrogen ligase activity, with glutamine as amido-N-donor	--
CGLO_07201	650.506	878.048	0.432738	Up	0.355574	1275	EQB53117	gi|596649881|ref|XP_007273022.1|	eukaryotic translation initiation factor 5 [Colletotrichum gloeosporioides Nara gc5] >gi|429863455|gb|ELA37906.1| eukaryotic translation initiation factor 5 [Colletotrichum gloeosporioides Nara gc5]	tre:TRIREDRAFT_71410	hypothetical protein; K03262 translation initiation factor 5	GO:0001732 formation of cytoplasmic translation initiation complex | GO:0043547 positive regulation of GTPase activity | GO:0045947 negative regulation of translational initiation | GO:0042256 mature ribosome assembly	GO:0003743 translation initiation factor activity | GO:0005092 GDP-dissociation inhibitor activity | GO:0005096 GTPase activator activity | GO:0031369 translation initiation factor binding	GO:0043614 multi-eIF complex | GO:0022627 cytosolic small ribosomal subunit | GO:0033290 eukaryotic 48S preinitiation complex
CGLO_00601	0.477849	0.497131	0.0570724	Up	0.966181	327	EQB59065	gi|530479973|gb|EQB59065.1|	hypothetical protein CGLO_00601 [Colletotrichum gloeosporioides Cg-14]	--	--	--	--	--
CGLO_07460	59.9686	37.562	-0.674934	Down	0.404027	3597	EQB52877	gi|530472232|gb|EQB52877.1|	cytochrome b5-like Heme/Steroid binding domain-containing protein [Colletotrichum gloeosporioides Cg-14]	val:VDBG_08955	hypothetical protein; K13103 tuftelin-interacting protein 11	GO:0055114 oxidation-reduction process | GO:0006355 regulation of transcription, DNA-templated	GO:0003677 DNA binding | GO:0016491 oxidoreductase activity | GO:0020037 heme binding	GO:0005634 nucleus
CGLO_17431	1.05381	0.814061	-0.372405	Down	0.853363	1281	EQB43872	gi|530460574|gb|EQB43872.1|	mannitol 1-phosphate dehydrogenase [Colletotrichum gloeosporioides Cg-14]	npa:UCRNP2_7602	putative mannitol 1-phosphate dehydrogenase protein; K00480 salicylate hydroxylase [EC:1.14.13.1]	GO:0055114 oxidation-reduction process	GO:0071949 FAD binding | GO:0016491 oxidoreductase activity	--
CGLO_07399	3.52579	3.97176	0.171829	Up	0.955896	1452	EQB52929	gi|530472293|gb|EQB52929.1|	hypothetical protein CGLO_07399 [Colletotrichum gloeosporioides Cg-14]	--	--	GO:0055085 transmembrane transport | GO:0006865 amino acid transport	--	GO:0016020 membrane
CGLO_12228	114.42	110.477	-0.0506002	Down	0.966181	1851	EQB48542	gi|530466807|gb|EQB48542.1|	hypothetical protein CGLO_12228 [Colletotrichum gloeosporioides Cg-14]	--	--	--	GO:0003677 DNA binding	--
CGLO_10038	71.4545	77.9808	0.126095	Up	0.942037	1275	EQB50508	gi|530469335|gb|EQB50508.1|	PXA domain-containing protein [Colletotrichum gloeosporioides Cg-14]	nhe:NECHADRAFT_68635	hypothetical protein; K17656 mitochondrial splicing suppressor protein 51	--	--	--
CGLO_12070	856.735	850.301	-0.0108748	Down	0.990666	1779	EQB48682	gi|530466980|gb|EQB48682.1|	hypothetical protein CGLO_12070 [Colletotrichum gloeosporioides Cg-14]	cthr:CTHT_0022590	phosphatidylinositol 4-kinase-like protein; K19801 phosphatidylinositol 4-kinase B [EC:2.7.1.67]	GO:0003333 amino acid transmembrane transport	GO:0015171 amino acid transmembrane transporter activity	GO:0016021 integral component of membrane
CGLO_05845	56.5181	49.5195	-0.190715	Down	0.913063	4311	EQB54339	gi|530474027|gb|EQB54339.1|	hypothetical protein CGLO_05845 [Colletotrichum gloeosporioides Cg-14]	fpu:FPSE_04113	hypothetical protein; K00846 ketohexokinase [EC:2.7.1.3]	GO:0098869 cellular oxidant detoxification | GO:0055114 oxidation-reduction process | GO:0006979 response to oxidative stress	GO:0020037 heme binding | GO:0016773 phosphotransferase activity, alcohol group as acceptor | GO:0004601 peroxidase activity	--
CGLO_04762	0.959852	1.01111	0.0750483	Up	0.966181	360	EQB55319	gi|530475212|gb|EQB55319.1|	hypothetical protein CGLO_04762 [Colletotrichum gloeosporioides Cg-14]	bcom:BAUCODRAFT_145454	hypothetical protein; K16302 metal transporter CNNM	--	--	--
CGLO_15876	53.7211	44.6092	-0.268149	Down	0.853363	876	EQB45270	gi|530462350|gb|EQB45270.1|	hypothetical protein CGLO_15876 [Colletotrichum gloeosporioides Cg-14]	ela:UCREL1_7316	putative serine threonine-protein kinase bud32 protein; K08851 TP53 regulating kinase and related kinases [EC:2.7.11.1]	GO:0006468 protein phosphorylation	GO:0005524 ATP binding | GO:0004674 protein serine/threonine kinase activity	--
CGLO_14988	41.7141	38.5414	-0.114126	Down	0.951716	387	EQB46036	gi|530463332|gb|EQB46036.1|	hypothetical protein CGLO_14988 [Colletotrichum gloeosporioides Cg-14]	--	--	--	--	GO:0016021 integral component of membrane
CGLO_13426	1.42225	3.06422	1.10734	Up	0.373305	1668	EQB47416	gi|530465295|gb|EQB47416.1|	hypothetical protein CGLO_13426 [Colletotrichum gloeosporioides Cg-14]	pbn:PADG_11673	PADG_03889, PADG_03890; hypothetical protein; K15628 ATP-binding cassette, subfamily D (ALD), peroxisomal long-chain fatty acid import protein	GO:0055114 oxidation-reduction process	GO:0020037 heme binding | GO:0016705 oxidoreductase activity, acting on paired donors, with incorporation or reduction of molecular oxygen | GO:0004497 monooxygenase activity | GO:0005506 iron ion binding	GO:0016021 integral component of membrane
CGLO_13127	549.073	672.289	0.292084	Up	0.670245	3060	EQB47705	gi|530465705|gb|EQB47705.1|	hypothetical protein CGLO_13127 [Colletotrichum gloeosporioides Cg-14]	ure:UREG_02651	hypothetical protein; K12190 ESCRT-II complex subunit VPS36	--	--	--
CGLO_14712	44.6897	24.9368	-0.841669	Down	0.505834	651	EQB46249	gi|530463618|gb|EQB46249.1|	hypothetical protein CGLO_14712 [Colletotrichum gloeosporioides Cg-14]	nte:NEUTE1DRAFT149165	NEUTE1DRAFT_149165; hypothetical protein; K05349 beta-glucosidase [EC:3.2.1.21]	GO:0006355 regulation of transcription, DNA-templated	GO:0043565 sequence-specific DNA binding | GO:0003700 transcription factor activity, sequence-specific DNA binding	--
CGLO_08671	11905.2	6513.91	-0.870003	Down	0.000976781	906	EQB51755	gi|530470858|gb|EQB51755.1|	hypothetical protein CGLO_08671 [Colletotrichum gloeosporioides Cg-14]	--	--	--	--	--
CGLO_07634	20.0917	20.4489	0.0254236	Up	0.985284	1167	EQB52716	gi|530472034|gb|EQB52716.1|	hypothetical protein CGLO_07634 [Colletotrichum gloeosporioides Cg-14]	maw:MAC_00160	cell wall glycosyl hydrolase YteR, putative; K15532 unsaturated rhamnogalacturonyl hydrolase [EC:3.2.1.172]	GO:0008152 metabolic process	GO:0016787 hydrolase activity	--
CGLO_15209	301.655	250.494	-0.268121	Down	0.69388	1755	EQB45863	gi|530463092|gb|EQB45863.1|	hypothetical protein CGLO_15209 [Colletotrichum gloeosporioides Cg-14]	--	--	--	--	--
CGLO_05215	0.955403	1.00533	0.0734829	Up	0.966181	789	EQB54902	gi|530474714|gb|EQB54902.1|	hypothetical protein CGLO_05215 [Colletotrichum gloeosporioides Cg-14]	--	--	--	--	--
CGLO_04197	70.4607	38.6363	-0.866862	Down	0.295504	816	EQB55836	gi|530475834|gb|EQB55836.1|	hypothetical protein CGLO_04197 [Colletotrichum gloeosporioides Cg-14]	--	--	GO:0008152 metabolic process	GO:0016740 transferase activity	--
CGLO_16852	189.431	94.4885	-1.00346	Down	0.0206575	870	EQB44408	gi|530461253|gb|EQB44408.1|	hypothetical protein CGLO_16852 [Colletotrichum gloeosporioides Cg-14]	vda:VDAG_00198	Atg2p; K17906 autophagy-related protein 2	GO:0044712 single-organism catabolic process | GO:1902589 single-organism organelle organization | GO:0044804 nucleophagy	--	GO:0019898 extrinsic component of membrane | GO:0000407 pre-autophagosomal structure
CGLO_10572	162.475	100.816	-0.688495	Down	0.170924	252	EQB50026	gi|530468718|gb|EQB50026.1|	hypothetical protein CGLO_10572 [Colletotrichum gloeosporioides Cg-14]	--	--	--	--	--
CGLO_10082	16.5134	23.9873	0.538637	Up	0.71156	1311	EQB50464	gi|530469279|gb|EQB50464.1|	hypothetical protein CGLO_10082 [Colletotrichum gloeosporioides Cg-14]	--	--	GO:0006357 regulation of transcription from RNA polymerase II promoter	GO:0000981 RNA polymerase II transcription factor activity, sequence-specific DNA binding | GO:0008270 zinc ion binding	GO:0005634 nucleus
CGLO_16826	21.3926	27.7662	0.376223	Up	0.841758	738	EQB44436	gi|530461288|gb|EQB44436.1|	hypothetical protein CGLO_16826 [Colletotrichum gloeosporioides Cg-14]	--	--	--	--	GO:0005730 nucleolus | GO:0005829 cytosol
CGLO_07244	0.373852	0.328316	-0.18738	Down	0.902858	1014	EQB53073	gi|530472467|gb|EQB53073.1|	hypothetical protein CGLO_07244 [Colletotrichum gloeosporioides Cg-14]	--	--	--	--	--
CGLO_15461	1652.7	1696.26	0.037531	Up	0.966181	813	EQB45630	gi|596719214|ref|XP_007285892.1|	proteasome subunit beta type 7 precursor [Colletotrichum gloeosporioides Nara gc5] >gi|429849695|gb|ELA25050.1| proteasome subunit beta type 7 precursor [Colletotrichum gloeosporioides Nara gc5]	vda:VDAG_04256	proteasome component PUP1; K02739 20S proteasome subunit beta 2 [EC:3.4.25.1]	GO:0010499 proteasomal ubiquitin-independent protein catabolic process | GO:0045842 positive regulation of mitotic metaphase/anaphase transition	GO:0004298 threonine-type endopeptidase activity	GO:0005789 endoplasmic reticulum membrane | GO:0034515 proteasome storage granule | GO:0005635 nuclear envelope | GO:0019774 proteasome core complex, beta-subunit complex
CGLO_12229	254.01	278.104	0.13074	Up	0.913256	996	EQB48543	gi|596729102|ref|XP_007287785.1|	oligosaccharyl transferase subunit [Colletotrichum gloeosporioides Nara gc5] >gi|429847551|gb|ELA23143.1| oligosaccharyl transferase subunit [Colletotrichum gloeosporioides Nara gc5] >gi|530466808|gb|EQB48543.1| OST3/OST6 family protein [Colletotrichum gloeosporioides Cg-14]	nhe:NECHADRAFT_69186	hypothetical protein; K12669 oligosaccharyltransferase complex subunit gamma	GO:0035269 protein O-linked mannosylation | GO:0006461 protein complex assembly | GO:0006487 protein N-linked glycosylation	GO:0004579 dolichyl-diphosphooligosaccharide-protein glycotransferase activity	GO:0016021 integral component of membrane | GO:0008250 oligosaccharyltransferase complex
CGLO_02228	28.4512	49.76	0.8065	Up	0.293151	522	EQB57617	gi|530478220|gb|EQB57617.1|	CTP synthase [Colletotrichum gloeosporioides Cg-14]	npa:UCRNP2_2769	putative ctp synthase protein; K01937 CTP synthase [EC:6.3.4.2]	GO:0006541 glutamine metabolic process | GO:0044210 'de novo' CTP biosynthetic process	GO:0003883 CTP synthase activity | GO:0005524 ATP binding	--
CGLO_11027	97.9408	104.202	0.0894013	Up	0.946721	939	EQB49629	gi|530468199|gb|EQB49629.1|	hypothetical protein CGLO_11027 [Colletotrichum gloeosporioides Cg-14]	nhe:NECHADRAFT_104662	hypothetical protein; K04718 sphingosine kinase [EC:2.7.1.91]	--	--	--
CGLO_17364	0.143864	0.14924	0.0529239	Up	0.966181	867	EQB43929	gi|530460638|gb|EQB43929.1|	hypothetical protein CGLO_17364 [Colletotrichum gloeosporioides Cg-14]	--	--	--	--	GO:0016021 integral component of membrane
CGLO_03979	54.4791	63.6693	0.224895	Up	0.902858	3039	EQB56029	gi|530476078|gb|EQB56029.1|	hypothetical protein CGLO_03979 [Colletotrichum gloeosporioides Cg-14]	pno:SNOG_04691	hypothetical protein; K16261 yeast amino acid transporter	--	GO:0003676 nucleic acid binding | GO:0046872 metal ion binding	--
CGLO_06560	193.473	160.082	-0.273319	Down	0.885976	1638	EQB53697	gi|530473226|gb|EQB53697.1|	DnaJ domain-containing protein [Colletotrichum gloeosporioides Cg-14]	fpu:FPSE_07641	hypothetical protein; K09506 DnaJ homolog subfamily A member 5	GO:0000054 ribosomal subunit export from nucleus | GO:0042273 ribosomal large subunit biogenesis | GO:0006364 rRNA processing | GO:0008361 regulation of cell size | GO:0032781 positive regulation of ATPase activity | GO:0006897 endocytosis	GO:0008270 zinc ion binding | GO:0003676 nucleic acid binding | GO:0001671 ATPase activator activity	GO:0005739 mitochondrion | GO:0005730 nucleolus | GO:0022625 cytosolic large ribosomal subunit
CGLO_14623	546.523	513.795	-0.0890904	Down	0.94343	1371	EQB46330	gi|530463750|gb|EQB46330.1|	seryl-tRNA synthetase [Colletotrichum gloeosporioides Cg-14]	fgr:FGSG_04202	seryl-tRNA synthetase; K01875 seryl-tRNA synthetase [EC:6.1.1.11]	GO:0006434 seryl-tRNA aminoacylation	GO:0004828 serine-tRNA ligase activity | GO:0005524 ATP binding	GO:0005737 cytoplasm
CGLO_07316	46.62	57.0834	0.292122	Up	0.861276	2412	EQB52997	gi|530472374|gb|EQB52997.1|	stress-activated map kinase-interacting protein [Colletotrichum gloeosporioides Cg-14]	vda:VDAG_06479	hypothetical protein; K20410 target of rapamycin complex 2 subunit MAPKAP1	GO:0031505 fungal-type cell wall organization | GO:0016310 phosphorylation | GO:0001558 regulation of cell growth | GO:0030950 establishment or maintenance of actin cytoskeleton polarity | GO:0031929 TOR signaling	GO:0016301 kinase activity | GO:0005546 phosphatidylinositol-4,5-bisphosphate binding	GO:0005737 cytoplasm | GO:0005886 plasma membrane | GO:0031932 TORC2 complex
CGLO_15285	124.676	111.712	-0.158393	Down	0.902858	1494	EQB45795	gi|375005174|gb|AFA28259.1|	cAMP-dependent protein kinase catalytic subunit [Colletotrichum gloeosporioides]	nhe:NECHADRAFT_68629	hypothetical protein; K04345 protein kinase A [EC:2.7.11.11]	GO:0006468 protein phosphorylation	GO:0005524 ATP binding | GO:0004674 protein serine/threonine kinase activity	--
CGLO_09807	64.3809	34.9568	-0.881058	Down	0.0987466	516	EQB50744	gi|530469628|gb|EQB50744.1|	hypothetical protein CGLO_09807 [Colletotrichum gloeosporioides Cg-14]	--	--	--	--	GO:0016021 integral component of membrane
CGLO_06465	4.05616	8.56943	1.07909	Up	0.413991	1017	EQB53784	gi|530473326|gb|EQB53784.1|	G-patch domain-containing protein [Colletotrichum gloeosporioides Cg-14]	--	--	--	GO:0003676 nucleic acid binding	--
CGLO_17116	23.4152	7.03603	-1.73461	Down	0.015202	1884	EQB44160	gi|530460936|gb|EQB44160.1|	hypothetical protein CGLO_17116 [Colletotrichum gloeosporioides Cg-14]	--	--	--	--	GO:0016021 integral component of membrane
CGLO_01983	4835.43	4719.63	-0.0349685	Down	0.966181	1212	EQB57842	gi|530478486|gb|EQB57842.1|	hypothetical protein CGLO_01983 [Colletotrichum gloeosporioides Cg-14]	--	--	--	--	--
CGLO_08007	0.59762	0.497779	-0.263722	Down	0.853363	1602	EQB52369	gi|530471612|gb|EQB52369.1|	cytochrome P450 [Colletotrichum gloeosporioides Cg-14]	adl:AURDEDRAFT_56813	cytochrome P450; K07824 benzoate 4-monooxygenase [EC:1.14.13.12]	GO:0055114 oxidation-reduction process	GO:0020037 heme binding | GO:0016705 oxidoreductase activity, acting on paired donors, with incorporation or reduction of molecular oxygen | GO:0004497 monooxygenase activity | GO:0005506 iron ion binding	GO:0016021 integral component of membrane
CGLO_00777	325.708	247.164	-0.39811	Down	0.514908	1287	EQB58908	gi|530479783|gb|EQB58908.1|	hypothetical protein CGLO_00777 [Colletotrichum gloeosporioides Cg-14]	--	--	--	--	--
CGLO_04414	3.89082	10.176	1.38703	Up	0.170924	1908	EQB55636	gi|530475599|gb|EQB55636.1|	hypothetical protein CGLO_04414 [Colletotrichum gloeosporioides Cg-14]	ela:UCREL1_7820	putative inositol oxygenase 1 protein; K00469 inositol oxygenase [EC:1.13.99.1]	--	GO:0005524 ATP binding	--
CGLO_11588	172.919	160.433	-0.108127	Down	0.93194	1008	EQB49102	gi|530467542|gb|EQB49102.1|	NUDIX domain-containing protein [Colletotrichum gloeosporioides Cg-14]	pic:PICST_46967	TNR3; thiamine pyrophosphokinase; K00949 thiamine pyrophosphokinase [EC:2.7.6.2]	GO:0016310 phosphorylation	GO:0016787 hydrolase activity | GO:0016301 kinase activity	--
CGLO_06181	199	182.427	-0.12545	Down	0.911453	5559	EQB54030	gi|530473640|gb|EQB54030.1|	Sec7 domain-containing protein [Colletotrichum gloeosporioides Cg-14]	vda:VDAG_08166	transport protein sec71; K18442 brefeldin A-inhibited guanine nucleotide-exchange protein	GO:0000045 autophagosome assembly | GO:0032012 regulation of ARF protein signal transduction | GO:0006891 intra-Golgi vesicle-mediated transport | GO:0043547 positive regulation of GTPase activity | GO:0006888 ER to Golgi vesicle-mediated transport	GO:0005086 ARF guanyl-nucleotide exchange factor activity	GO:0005829 cytosol | GO:0005770 late endosome | GO:0005802 trans-Golgi network | GO:0005798 Golgi-associated vesicle
CGLO_05950	290.194	375.529	0.371908	Up	0.851351	2298	EQB54241	gi|530473908|gb|EQB54241.1|	hypothetical protein CGLO_05950 [Colletotrichum gloeosporioides Cg-14]	vda:VDAG_02690	glutamyl-tRNA(Gln) amidotransferase subunit A; K02433 aspartyl-tRNA(Asn)/glutamyl-tRNA(Gln) amidotransferase subunit A [EC:6.3.5.6 6.3.5.7]	GO:0007029 endoplasmic reticulum organization | GO:0070681 glutaminyl-tRNAGln biosynthesis via transamidation | GO:0032543 mitochondrial translation | GO:0006950 response to stress	GO:0050567 glutaminyl-tRNA synthase (glutamine-hydrolyzing) activity | GO:0005524 ATP binding | GO:0016740 transferase activity	GO:0016021 integral component of membrane | GO:0005739 mitochondrion | GO:0030956 glutamyl-tRNA(Gln) amidotransferase complex
CGLO_11347	26.982	24.4226	-0.14378	Down	0.951673	363	EQB49314	gi|530467804|gb|EQB49314.1|	hypothetical protein CGLO_11347 [Colletotrichum gloeosporioides Cg-14]	nhe:NECHADRAFT_80686	hypothetical protein; K09780 uncharacterized protein	--	--	--
CGLO_08981	687.767	634.381	-0.11657	Down	0.917138	2100	EQB51483	gi|530470524|gb|EQB51483.1|	AMP-binding enzyme [Colletotrichum gloeosporioides Cg-14]	vda:VDAG_00401	long-chain-fatty-acid-CoA ligase; K01897 long-chain acyl-CoA synthetase [EC:6.2.1.3]	GO:0008152 metabolic process	GO:0003824 catalytic activity	--
CGLO_00874	0.142609	0.147938	0.0529239	Up	0.966181	645	EQB58828	gi|530479682|gb|EQB58828.1|	hypothetical protein CGLO_00874 [Colletotrichum gloeosporioides Cg-14]	--	--	--	--	--
CGLO_10337	0.142609	0.147938	0.0529239	Up	0.966181	1545	EQB50218	gi|530468970|gb|EQB50218.1|	major facilitator superfamily transporter [Colletotrichum gloeosporioides Cg-14]	aor:AOR_1_1468054	AO090011000870; MFS allantoate transporter; K08192 MFS transporter, ACS family, allantoate permease	GO:0055085 transmembrane transport	--	GO:0016021 integral component of membrane
CGLO_00528	112.177	90.6437	-0.307497	Down	0.842672	714	EQB59114	gi|530480037|gb|EQB59114.1|	fumarylacetoacetate hydrolase [Colletotrichum gloeosporioides Cg-14]	bze:COCCADRAFT_37452	hypothetical protein; K03142 transcription initiation factor TFIIH subunit 2	GO:0008152 metabolic process	GO:0016787 hydrolase activity	--
CGLO_06794	99.4105	111.472	0.165214	Up	0.936848	3813	EQB53474	gi|530472968|gb|EQB53474.1|	SET domain-containing protein [Colletotrichum gloeosporioides Cg-14]	mtm:MYCTH_79077	SET1-like protein; K11422 histone-lysine N-methyltransferase SETD1 [EC:2.1.1.43]	GO:0030466 chromatin silencing at silent mating-type cassette | GO:0043618 regulation of transcription from RNA polymerase II promoter in response to stress | GO:0030437 ascospore formation | GO:0018027 peptidyl-lysine dimethylation | GO:0000723 telomere maintenance | GO:0051568 histone H3-K4 methylation | GO:0035066 positive regulation of histone acetylation | GO:0006348 chromatin silencing at t…	GO:0000166 nucleotide binding | GO:0018024 histone-lysine N-methyltransferase activity | GO:0003723 RNA binding	GO:0000781 chromosome, telomeric region | GO:0048188 Set1C/COMPASS complex
CGLO_10287	99.1648	163.532	0.72167	Up	0.125839	2652	EQB50283	gi|530469047|gb|EQB50283.1|	hypothetical protein CGLO_10287 [Colletotrichum gloeosporioides Cg-14]	--	--	--	--	--
CGLO_09234	95.9531	72.3331	-0.407674	Down	0.870032	402	EQB51234	gi|530470222|gb|EQB51234.1|	hypothetical protein CGLO_09234 [Colletotrichum gloeosporioides Cg-14]	--	--	--	--	--
CGLO_05336	4.4313	3.42072	-0.37343	Down	0.902858	1530	EQB54780	gi|530474581|gb|EQB54780.1|	HET domain-containing protein [Colletotrichum gloeosporioides Cg-14]	afv:AFLA_005130	L-lysine 2,3-aminomutase, putative; K01843 lysine 2,3-aminomutase [EC:5.4.3.2]	--	--	GO:0016020 membrane
CGLO_01623	45.306	44.0472	-0.040649	Down	0.973656	375	EQB58163	gi|596707959|ref|XP_007283849.1|	thioredoxin-like protein 5 [Colletotrichum gloeosporioides Nara gc5] >gi|429851951|gb|ELA27108.1| thioredoxin-like protein 5 [Colletotrichum gloeosporioides Nara gc5]	--	--	--	--	--
CGLO_04332	47.4387	57.5208	0.27802	Up	0.83719	504	EQB55717	gi|530475690|gb|EQB55717.1|	hypothetical protein CGLO_04332 [Colletotrichum gloeosporioides Cg-14]	--	--	GO:0006357 regulation of transcription from RNA polymerase II promoter	GO:0001104 RNA polymerase II transcription cofactor activity	GO:0016592 mediator complex
CGLO_00970	1504.24	860.49	-0.805806	Down	0.024891	1320	EQB58743	gi|530479580|gb|EQB58743.1|	hypothetical protein CGLO_00970 [Colletotrichum gloeosporioides Cg-14]	--	--	--	--	GO:0005634 nucleus | GO:0005829 cytosol
CGLO_11565	1.67467	2.40858	0.524309	Up	0.830277	1530	EQB49124	gi|530467570|gb|EQB49124.1|	glycosyl hydrolase family 43 [Colletotrichum gloeosporioides Cg-14]	ani:AN7864.2	hypothetical protein; K01198 xylan 1,4-beta-xylosidase [EC:3.2.1.37]	GO:0045493 xylan catabolic process	GO:0004553 hydrolase activity, hydrolyzing O-glycosyl compounds	--
CGLO_15720	21.9007	160.221	2.87102	Up	1.83e-09	4278	EQB45411	gi|530462531|gb|EQB45411.1|	NACHT and TPR domain-containing protein [Colletotrichum gloeosporioides Cg-14]	--	--	--	--	--
CGLO_12493	49.5374	52.5119	0.0841259	Up	0.966181	753	EQB48294	gi|530466491|gb|EQB48294.1|	hypothetical protein CGLO_12493 [Colletotrichum gloeosporioides Cg-14]	--	--	--	--	--
CGLO_08251	145.856	116.231	-0.327554	Down	0.64466	1260	EQB52141	gi|530471346|gb|EQB52141.1|	hypothetical protein CGLO_08251 [Colletotrichum gloeosporioides Cg-14]	maj:MAA_01190	acetylornithine deacetylase; K01438 acetylornithine deacetylase [EC:3.5.1.16]	GO:0006508 proteolysis	GO:0008237 metallopeptidase activity	--
CGLO_06167	1.89207	1.96906	0.0575397	Up	0.975796	303	EQB54044	gi|530473657|gb|EQB54044.1|	hypothetical protein CGLO_06167 [Colletotrichum gloeosporioides Cg-14]	--	--	--	--	--
CGLO_06877	0.846769	0.787577	-0.104548	Down	0.960854	222	EQB53400	gi|530472880|gb|EQB53400.1|	hypothetical protein CGLO_06877 [Colletotrichum gloeosporioides Cg-14]	--	--	--	--	--
CGLO_00964	10.9664	17.0394	0.635786	Up	0.711285	1590	EQB58746	gi|530479584|gb|EQB58746.1|	hypothetical protein CGLO_00964 [Colletotrichum gloeosporioides Cg-14]	--	--	GO:0006357 regulation of transcription from RNA polymerase II promoter	GO:0000981 RNA polymerase II transcription factor activity, sequence-specific DNA binding | GO:0008270 zinc ion binding	GO:0005634 nucleus
CGLO_03393	0.349448	0.342927	-0.0271774	Down	0.979526	564	EQB56587	gi|530476734|gb|EQB56587.1|	hypothetical protein CGLO_03393 [Colletotrichum gloeosporioides Cg-14]	--	--	--	--	--
CGLO_10916	5020.56	5524.76	0.138066	Up	0.888747	2655	EQB49722	gi|530468321|gb|EQB49722.1|	hypothetical protein CGLO_10916 [Colletotrichum gloeosporioides Cg-14]	vda:VDAG_08981	glycogen phosphorylase; K00688 glycogen phosphorylase [EC:2.4.1.1]	GO:0005980 glycogen catabolic process	GO:0008184 glycogen phosphorylase activity | GO:0030170 pyridoxal phosphate binding	GO:0005737 cytoplasm
CGLO_02803	519.458	497.831	-0.0613503	Down	0.956398	741	EQB57108	gi|596674383|ref|XP_007277614.1|	eukaryotic translation initiation factor 6 [Colletotrichum gloeosporioides Nara gc5] >gi|429858502|gb|ELA33318.1| eukaryotic translation initiation factor 6 [Colletotrichum gloeosporioides Nara gc5]	vda:VDAG_06394	eukaryotic translation initiation factor 6; K03264 translation initiation factor 6	GO:0006413 translational initiation | GO:0000054 ribosomal subunit export from nucleus | GO:1902626 assembly of large subunit precursor of preribosome | GO:0000463 maturation of LSU-rRNA from tricistronic rRNA transcript (SSU-rRNA, 5.8S rRNA, LSU-rRNA) | GO:0042256 mature ribosome assembly | GO:0000466 maturation of 5.8S rRNA from tricistronic rRNA transcript (SSU-rRNA, 5.8S rRNA, LSU-rRNA)	GO:0003743 translation initiation factor activity | GO:0043023 ribosomal large subunit binding | GO:0043022 ribosome binding	GO:0005829 cytosol | GO:0005730 nucleolus | GO:0030687 preribosome, large subunit precursor
CGLO_02791	110.867	120.605	0.121457	Up	0.94343	1053	EQB57115	gi|530477599|gb|EQB57115.1|	hypothetical protein CGLO_02791 [Colletotrichum gloeosporioides Cg-14]	ctp:CTRG_05725	hypothetical protein; K12386 cystinosin	--	--	GO:0016021 integral component of membrane
CGLO_09184	207.945	217.514	0.0649087	Up	0.966181	693	EQB51286	gi|530470284|gb|EQB51286.1|	hypothetical protein CGLO_09184 [Colletotrichum gloeosporioides Cg-14]	nhe:NECHADRAFT_76443	hypothetical protein; K03013 DNA-directed RNA polymerases I, II, and III subunit RPABC1	GO:0006351 transcription, DNA-templated	GO:0003899 DNA-directed RNA polymerase activity | GO:0003677 DNA binding	GO:0005634 nucleus
CGLO_16908	1.55308	1.65171	0.0888311	Up	0.966181	1017	EQB44357	gi|530461187|gb|EQB44357.1|	hypothetical protein CGLO_16908 [Colletotrichum gloeosporioides Cg-14]	--	--	--	--	GO:0016021 integral component of membrane
CGLO_17731	440.816	515.099	0.224673	Up	0.737534	738	EQB43604	gi|596721441|ref|XP_007286312.1|	proteasome component pup2 [Colletotrichum gloeosporioides Nara gc5] >gi|429849310|gb|ELA24713.1| proteasome component pup2 [Colletotrichum gloeosporioides Nara gc5] >gi|477528699|gb|ENH80472.1| proteasome component pup2 [Colletotrichum orbiculare MAFF 240422]	fgr:FGSG_06159	proteasome component PUP2; K02729 20S proteasome subunit alpha 5 [EC:3.4.25.1]	GO:0010499 proteasomal ubiquitin-independent protein catabolic process | GO:0045842 positive regulation of mitotic metaphase/anaphase transition	GO:0004298 threonine-type endopeptidase activity	GO:0042175 nuclear outer membrane-endoplasmic reticulum membrane network | GO:0034515 proteasome storage granule | GO:0019773 proteasome core complex, alpha-subunit complex | GO:0005634 nucleus
CGLO_03300	3297.85	2701.32	-0.287861	Down	0.612115	1602	EQB56680	gi|530477055|gb|EQB56680.1|	hypothetical protein CGLO_03300 [Colletotrichum gloeosporioides Cg-14]	--	--	--	--	--
CGLO_09255	4.02537	5.9006	0.55174	Up	0.814935	1437	EQB51231	gi|530470217|gb|EQB51231.1|	hypothetical protein CGLO_09255 [Colletotrichum gloeosporioides Cg-14]	afm:AFUA_4G11800	alkaline serine protease Alp1; K18549 oryzin [EC:3.4.21.63]	GO:0006508 proteolysis	GO:0004252 serine-type endopeptidase activity	--
CGLO_15472	106.723	111.081	0.057739	Up	0.967025	1713	EQB45625	gi|530462802|gb|EQB45625.1|	glycosyl hydrolase family 2 [Colletotrichum gloeosporioides Cg-14]	vda:VDAG_05015	beta-galactosidase; K01190 beta-galactosidase [EC:3.2.1.23]	GO:0005975 carbohydrate metabolic process	GO:0030246 carbohydrate binding | GO:0004565 beta-galactosidase activity	GO:0009341 beta-galactosidase complex
CGLO_05580	19.2564	49.852	1.37231	Up	0.0234462	921	EQB54567	gi|530474314|gb|EQB54567.1|	coagulation factor 5/8 type domain-containing protein [Colletotrichum gloeosporioides Cg-14]	mtm:MYCTH_2109123	hypothetical protein; K15634 probable phosphoglycerate mutase [EC:5.4.2.12]	--	--	--
CGLO_12388	0.348158	0.34166	-0.0271774	Down	0.979526	1002	EQB48366	gi|530466583|gb|EQB48366.1|	hypothetical protein CGLO_12388 [Colletotrichum gloeosporioides Cg-14]	npa:UCRNP2_3166	putative amino acid transporter protein; K00505 tyrosinase [EC:1.14.18.1]	GO:0055114 oxidation-reduction process	GO:0046872 metal ion binding | GO:0016491 oxidoreductase activity	--
CGLO_01971	8.09459	10.3832	0.359224	Up	0.902858	879	EQB57850	gi|530478497|gb|EQB57850.1|	cytochrome P450 monooxygenase [Colletotrichum gloeosporioides Cg-14]	fpu:FPSE_05313	hypothetical protein; K16261 yeast amino acid transporter	GO:0055114 oxidation-reduction process	GO:0020037 heme binding | GO:0016705 oxidoreductase activity, acting on paired donors, with incorporation or reduction of molecular oxygen | GO:0004497 monooxygenase activity | GO:0005506 iron ion binding	GO:0016021 integral component of membrane
CGLO_00395	16.0736	24.8111	0.62629	Up	0.734053	1122	EQB59240	gi|530480190|gb|EQB59240.1|	hypothetical protein CGLO_00395 [Colletotrichum gloeosporioides Cg-14]	--	--	--	--	--
CGLO_15705	16.4096	15.754	-0.0588245	Down	0.973298	252	EQB45429	gi|596721695|ref|XP_007286361.1|	cytochrome b5 [Colletotrichum gloeosporioides Nara gc5] >gi|429849168|gb|ELA24581.1| cytochrome b5 [Colletotrichum gloeosporioides Nara gc5]	ure:UREG_00888	ATP-dependent RNA helicase DHX8; K12813 pre-mRNA-splicing factor ATP-dependent RNA helicase DHX16 [EC:3.6.4.13]	--	--	--
CGLO_02324	0.538185	0.497005	-0.114841	Down	0.94343	894	EQB57535	gi|530478114|gb|EQB57535.1|	hypothetical protein CGLO_02324 [Colletotrichum gloeosporioides Cg-14]	--	--	--	--	--
CGLO_01644	119.375	360.073	1.59279	Up	0.000408739	1365	EQB58139	gi|530478844|gb|EQB58139.1|	hypothetical protein CGLO_01644 [Colletotrichum gloeosporioides Cg-14]	--	--	--	--	GO:0016021 integral component of membrane
CGLO_14913	18.4186	21.6936	0.236105	Up	0.928321	459	EQB46086	gi|530463400|gb|EQB46086.1|	hypothetical protein CGLO_14913 [Colletotrichum gloeosporioides Cg-14]	--	--	--	--	--
CGLO_07527	0.477849	0.497131	0.0570724	Up	0.966181	357	EQB52809	gi|530472155|gb|EQB52809.1|	hypothetical protein CGLO_07527 [Colletotrichum gloeosporioides Cg-14]	--	--	--	--	GO:0005840 ribosome
CGLO_17259	161.166	178.749	0.149388	Up	0.923292	1296	EQB44032	gi|530460772|gb|EQB44032.1|	hypothetical protein CGLO_17259 [Colletotrichum gloeosporioides Cg-14]	--	--	--	GO:0003676 nucleic acid binding | GO:0046872 metal ion binding	--
CGLO_15760	311.59	293.695	-0.0853314	Down	0.94343	1881	EQB45378	gi|530462489|gb|EQB45378.1|	hypothetical protein CGLO_15760 [Colletotrichum gloeosporioides Cg-14]	cnb:CNBI2670	hypothetical protein; K12602 WD repeat-containing protein 61	GO:2000158 positive regulation of ubiquitin-specific protease activity	--	GO:0005634 nucleus | GO:0005829 cytosol
CGLO_06544	342.028	293.342	-0.221529	Down	0.853732	3606	EQB53711	gi|530473242|gb|EQB53711.1|	HECT-domain-containing protein [Colletotrichum gloeosporioides Cg-14]	vda:VDAG_01943	ubiquitin-protein ligase E3A; K12232 E3 ubiquitin-protein ligase HECTD2 [EC:2.3.2.26]	GO:0016567 protein ubiquitination	GO:0016874 ligase activity | GO:0004842 ubiquitin-protein transferase activity	--
CGLO_10066	233.934	182.077	-0.361549	Down	0.552383	2631	EQB50494	gi|530469314|gb|EQB50494.1|	hypothetical protein CGLO_10066 [Colletotrichum gloeosporioides Cg-14]	cthr:CTHT_0019570	biotin synthase-like protein; K01012 biotin synthase [EC:2.8.1.6]	--	--	GO:0016021 integral component of membrane
CGLO_06145	113.779	137.017	0.268123	Up	0.841758	2385	EQB54056	gi|530473673|gb|EQB54056.1|	hypothetical protein CGLO_06145 [Colletotrichum gloeosporioides Cg-14]	--	--	--	--	--
CGLO_12763	220.207	138.135	-0.672785	Down	0.249337	1167	EQB48067	gi|530466181|gb|EQB48067.1|	hypothetical protein CGLO_12763 [Colletotrichum gloeosporioides Cg-14]	--	--	--	--	--
CGLO_07155	27.5445	125.739	2.19059	Up	1.94e-08	1755	EQB53150	gi|530472568|gb|EQB53150.1|	hypothetical protein CGLO_07155 [Colletotrichum gloeosporioides Cg-14]	gtr:GLOTRDRAFT_121064	MFS general substrate transporter; K08197 MFS transporter, SIT family, siderophore-iron:H+ symporter	GO:0055085 transmembrane transport	--	GO:0016021 integral component of membrane
CGLO_00681	3642.32	2037.88	-0.837791	Down	0.207403	1767	EQB58995	gi|530479888|gb|EQB58995.1|	hypothetical protein CGLO_00681 [Colletotrichum gloeosporioides Cg-14]	ani:AN7355.2	hypothetical protein; K15454 tRNA pseudouridine synthase 9 [EC:5.4.99.-]	GO:0055114 oxidation-reduction process	GO:0050660 flavin adenine dinucleotide binding | GO:0016614 oxidoreductase activity, acting on CH-OH group of donors	--
CGLO_05680	334.664	219.151	-0.610787	Down	0.557618	2787	EQB54496	gi|530474223|gb|EQB54496.1|	hypothetical protein CGLO_05680 [Colletotrichum gloeosporioides Cg-14]	cgr:CAGL0J07546g	hypothetical protein; K01341 kexin [EC:3.4.21.61]	GO:0006508 proteolysis | GO:0055114 oxidation-reduction process	GO:0016491 oxidoreductase activity | GO:0004252 serine-type endopeptidase activity | GO:0008270 zinc ion binding	GO:0016020 membrane | GO:0005618 cell wall
CGLO_12581	2.16549	2.68249	0.308874	Up	0.919384	876	EQB48207	gi|530466367|gb|EQB48207.1|	hypothetical protein CGLO_12581 [Colletotrichum gloeosporioides Cg-14]	--	--	--	--	GO:0016021 integral component of membrane
CGLO_10309	49.8209	68.7647	0.464917	Up	0.559201	1023	EQB50264	gi|530469023|gb|EQB50264.1|	RNA polymerase Rpb3/RpoA insert domain-containing protein [Colletotrichum gloeosporioides Cg-14]	vda:VDAG_07068	DNA-directed RNA polymerase II subunit RPB3; K03011 DNA-directed RNA polymerase II subunit RPB3	GO:0006369 termination of RNA polymerase II transcription | GO:0001172 transcription, RNA-templated	GO:0003899 DNA-directed RNA polymerase activity | GO:0003677 DNA binding | GO:0046983 protein dimerization activity	GO:0005829 cytosol | GO:0005665 DNA-directed RNA polymerase II, core complex
CGLO_06036	1203.17	676.13	-0.831467	Down	0.0789511	1530	EQB54160	gi|530473799|gb|EQB54160.1|	hypothetical protein CGLO_06036 [Colletotrichum gloeosporioides Cg-14]	maw:MAC_04088	peroxysomal citrate synthase; K01647 citrate synthase [EC:2.3.3.1]	GO:0006099 tricarboxylic acid cycle	GO:0046912 transferase activity, transferring acyl groups, acyl groups converted into alkyl on transfer	--
CGLO_13358	1.47179	1.48171	0.00969809	Up	0.994488	1149	EQB47486	gi|530465400|gb|EQB47486.1|	hypothetical protein CGLO_13358 [Colletotrichum gloeosporioides Cg-14]	--	--	--	--	--
CGLO_08949	6.56187	62.2302	3.24544	Up	4.95e-09	1422	EQB51503	gi|530470547|gb|EQB51503.1|	FAD binding domain-containing protein [Colletotrichum gloeosporioides Cg-14]	aje:HCAG_01147	cysteine desulfurase, mitochondrial precursor; K04487 cysteine desulfurase [EC:2.8.1.7]	GO:0055114 oxidation-reduction process	GO:0050660 flavin adenine dinucleotide binding | GO:0016614 oxidoreductase activity, acting on CH-OH group of donors	--
CGLO_05492	29.2374	26.3401	-0.150556	Down	0.94343	900	EQB54648	gi|530474415|gb|EQB54648.1|	hypothetical protein CGLO_05492 [Colletotrichum gloeosporioides Cg-14]	--	--	--	--	--
CGLO_14368	43.2438	28.9295	-0.579951	Down	0.617073	1473	EQB46575	gi|530464088|gb|EQB46575.1|	major facilitator superfamily transporter [Colletotrichum gloeosporioides Cg-14]	pic:PICST_85553	MDR112; Putative transporter; K08157 MFS transporter, DHA1 family, multidrug resistance protein	GO:0055085 transmembrane transport	--	GO:0016021 integral component of membrane
CGLO_02580	420.779	489.891	0.219399	Up	0.735101	1050	EQB57311	gi|530477841|gb|EQB57311.1|	hypothetical protein CGLO_02580 [Colletotrichum gloeosporioides Cg-14]	mgr:MGG_08115	NAD-binding Rossmann fold oxidoreductase; K00118 glucose-fructose oxidoreductase [EC:1.1.99.28]	GO:0006740 NADPH regeneration	GO:0016491 oxidoreductase activity	GO:0005737 cytoplasm | GO:0005634 nucleus
CGLO_05278	6.32891	4.43036	-0.514533	Down	0.838162	1203	EQB54838	gi|530474645|gb|EQB54838.1|	hypothetical protein CGLO_05278 [Colletotrichum gloeosporioides Cg-14]	--	--	--	--	GO:0016021 integral component of membrane
CGLO_09537	7.9595	15.3429	0.946824	Up	0.520586	744	EQB50979	gi|530469908|gb|EQB50979.1|	GDSL-like Lipase/Acylhydrolase [Colletotrichum gloeosporioides Cg-14]	adl:AURDEDRAFT_140474	hypothetical protein; K15530 rhamnogalacturonan acetylesterase [EC:3.1.1.86]	GO:0008152 metabolic process	GO:0016787 hydrolase activity	--
CGLO_02984	51.8759	43.545	-0.252557	Down	0.902858	1398	EQB56955	gi|530477388|gb|EQB56955.1|	hypothetical protein CGLO_02984 [Colletotrichum gloeosporioides Cg-14]	pan:PODANSg1509	hypothetical protein; K17866 diphthamide biosynthesis protein 2	GO:0055085 transmembrane transport	--	GO:0016021 integral component of membrane
CGLO_04977	1.25455	1.8459	0.557149	Up	0.74991	336	EQB55122	gi|530474976|gb|EQB55122.1|	hypothetical protein CGLO_04977 [Colletotrichum gloeosporioides Cg-14]	--	--	GO:0000160 phosphorelay signal transduction system | GO:0023014 signal transduction by protein phosphorylation	GO:0000155 phosphorelay sensor kinase activity	GO:0005622 intracellular
CGLO_15499	632.479	497.634	-0.345934	Down	0.544154	1401	EQB45604	gi|530462773|gb|EQB45604.1|	26S proteasome subunit RPN7 [Colletotrichum gloeosporioides Cg-14]	tmn:UCRPA7_6366	putative cop9 signalosome subunit 1 protein; K12175 COP9 signalosome complex subunit 1	GO:0010387 COP9 signalosome assembly | GO:0010388 cullin deneddylation	--	GO:0008180 COP9 signalosome | GO:0000502 proteasome complex
CGLO_15492	24.9408	20.981	-0.249421	Down	0.902858	1917	EQB45612	gi|530462783|gb|EQB45612.1|	artemis protein [Colletotrichum gloeosporioides Cg-14]	pte:PTT_17857	hypothetical protein; K11681 helicase SWR1 [EC:3.6.4.12]	--	--	--
CGLO_09058	55.0621	46.3306	-0.249095	Down	0.861276	756	EQB51404	gi|530470421|gb|EQB51404.1|	hypothetical protein CGLO_09058 [Colletotrichum gloeosporioides Cg-14]	val:VDBG_05869	N(5)-glutamine methyltransferase MTQ2; K19589 release factor glutamine methyltransferase [EC:2.1.1.297]	GO:0006417 regulation of translation | GO:0018364 peptidyl-glutamine methylation	GO:0003676 nucleic acid binding | GO:0008757 S-adenosylmethionine-dependent methyltransferase activity | GO:0008276 protein methyltransferase activity	GO:0005829 cytosol | GO:0035657 eRF1 methyltransferase complex
CGLO_12590	514.283	551.805	0.101596	Up	0.938625	792	EQB48197	gi|530466354|gb|EQB48197.1|	proteasome A-type and B-type [Colletotrichum gloeosporioides Cg-14]	val:VDBG_04731	proteasome component PRE4; K02736 20S proteasome subunit beta 7 [EC:3.4.25.1]	GO:0010499 proteasomal ubiquitin-independent protein catabolic process | GO:0045842 positive regulation of mitotic metaphase/anaphase transition | GO:0043248 proteasome assembly	GO:0004298 threonine-type endopeptidase activity	GO:0005789 endoplasmic reticulum membrane | GO:0034515 proteasome storage granule | GO:0019774 proteasome core complex, beta-subunit complex | GO:0005634 nucleus
CGLO_00287	216.568	187.247	-0.209878	Down	0.829043	1494	EQB59340	gi|530480315|gb|EQB59340.1|	hypothetical protein CGLO_00287 [Colletotrichum gloeosporioides Cg-14]	maw:MAC_06737	aromatic-L-amino-acid decarboxylase; K01593 aromatic-L-amino-acid decarboxylase [EC:4.1.1.28]	GO:0006520 cellular amino acid metabolic process	GO:0030170 pyridoxal phosphate binding | GO:0016831 carboxy-lyase activity	--
CGLO_05500	1.69531	1.90375	0.16729	Up	0.955848	177	EQB54642	gi|530474408|gb|EQB54642.1|	hypothetical protein CGLO_05500 [Colletotrichum gloeosporioides Cg-14]	mtm:MYCTH_2119125	hypothetical protein; K02913 large subunit ribosomal protein L33	GO:0006412 translation	GO:0003735 structural constituent of ribosome	GO:0005840 ribosome | GO:0016021 integral component of membrane
CGLO_04371	3.11773	10.0852	1.69367	Up	0.0741765	2955	EQB55667	gi|530475633|gb|EQB55667.1|	hypothetical protein CGLO_04371 [Colletotrichum gloeosporioides Cg-14]	pno:SNOG_04691	hypothetical protein; K16261 yeast amino acid transporter	--	--	--
CGLO_08643	430.127	342.538	-0.328498	Down	0.734053	1995	EQB51773	gi|530470880|gb|EQB51773.1|	hypothetical protein CGLO_08643 [Colletotrichum gloeosporioides Cg-14]	pan:PODANSg09927	hypothetical protein; K09265 transcription factor RLM1	GO:0006355 regulation of transcription, DNA-templated	GO:0003677 DNA binding | GO:0046983 protein dimerization activity	GO:0005634 nucleus
CGLO_07571	60.6822	92.3607	0.606007	Up	0.497236	1593	EQB52779	gi|530472117|gb|EQB52779.1|	hypothetical protein CGLO_07571 [Colletotrichum gloeosporioides Cg-14]	vda:VDAG_06714	ATP-dependent RNA helicase DBP3; K14811 ATP-dependent RNA helicase DBP3 [EC:3.6.4.13]	GO:0000464 endonucleolytic cleavage in ITS1 upstream of 5.8S rRNA from tricistronic rRNA transcript (SSU-rRNA, 5.8S rRNA, LSU-rRNA) | GO:0000027 ribosomal large subunit assembly	GO:0004004 ATP-dependent RNA helicase activity | GO:0003676 nucleic acid binding | GO:0005524 ATP binding	GO:0005730 nucleolus | GO:0030687 preribosome, large subunit precursor
CGLO_16757	247.973	257.207	0.0527447	Up	0.966181	1854	EQB44498	gi|530461368|gb|EQB44498.1|	magnesium and cobalt transporter CorA [Colletotrichum gloeosporioides Cg-14]	--	--	GO:0030001 metal ion transport | GO:0055085 transmembrane transport	GO:0046873 metal ion transmembrane transporter activity	GO:0016021 integral component of membrane
CGLO_14828	0.2796	0.306607	0.133025	Up	0.938616	828	EQB46161	gi|530463495|gb|EQB46161.1|	hypothetical protein CGLO_14828 [Colletotrichum gloeosporioides Cg-14]	--	--	--	--	--
CGLO_06963	45.8727	40.3483	-0.185129	Down	0.938616	2277	EQB53316	gi|530472779|gb|EQB53316.1|	hypothetical protein CGLO_06963 [Colletotrichum gloeosporioides Cg-14]	afm:AFUA_2G00340	diaminopropionate ammonia-lyase; K01751 diaminopropionate ammonia-lyase [EC:4.3.1.15]	GO:0006508 proteolysis	GO:0008237 metallopeptidase activity	--
CGLO_17793	13604	7810.16	-0.800606	Down	0.00815625	651	EQB43549	gi|596664225|ref|XP_007275697.1|	low affinity copper transporter [Colletotrichum gloeosporioides Nara gc5] >gi|429860483|gb|ELA35219.1| low affinity copper transporter [Colletotrichum gloeosporioides Nara gc5] >gi|530460157|gb|EQB43549.1| ctr copper transporter [Colletotrichum gloeosporioides Cg-14]	--	--	GO:0035434 copper ion transmembrane transport	GO:0005375 copper ion transmembrane transporter activity	GO:0016021 integral component of membrane
CGLO_12820	26.9136	55.9767	1.05649	Up	0.128974	366	EQB47976	gi|530466060|gb|EQB47976.1|	hypothetical protein CGLO_12820 [Colletotrichum gloeosporioides Cg-14]	--	--	--	--	GO:0016021 integral component of membrane
CGLO_04813	3.3649	3.46948	0.0441565	Up	0.980455	600	EQB55280	gi|530475163|gb|EQB55280.1|	hypothetical protein CGLO_04813 [Colletotrichum gloeosporioides Cg-14]	--	--	--	--	GO:0016021 integral component of membrane
CGLO_12172	138.819	92.1846	-0.590611	Down	0.560266	1638	EQB48583	gi|530466853|gb|EQB48583.1|	hypothetical protein CGLO_12172 [Colletotrichum gloeosporioides Cg-14]	psq:PUNSTDRAFT_98111	nitrite reductase; K17877 nitrite reductase (NAD(P)H) [EC:1.7.1.4]	GO:0045454 cell redox homeostasis | GO:0055114 oxidation-reduction process	GO:0050660 flavin adenine dinucleotide binding | GO:0046872 metal ion binding | GO:0016491 oxidoreductase activity | GO:0051537 2 iron, 2 sulfur cluster binding	GO:0005623 cell
CGLO_01968	47.0708	59.6058	0.34062	Up	0.753692	561	EQB57847	gi|530478494|gb|EQB57847.1|	hypothetical protein CGLO_01968 [Colletotrichum gloeosporioides Cg-14]	val:VDBG_02142	ADP-ribosylation factor 6; K07941 ADP-ribosylation factor 6	GO:0051519 activation of bipolar cell growth | GO:0007264 small GTPase mediated signal transduction | GO:0006886 intracellular protein transport	GO:0005525 GTP binding	GO:0032153 cell division site | GO:0000935 barrier septum | GO:0051285 cell cortex of cell tip
CGLO_00361	111.228	93.7103	-0.247236	Down	0.864636	1053	EQB59264	gi|530480218|gb|EQB59264.1|	hypothetical protein CGLO_00361 [Colletotrichum gloeosporioides Cg-14]	--	--	--	--	--
CGLO_00417	554.84	683.602	0.301085	Up	0.699528	1464	EQB59227	gi|530480173|gb|EQB59227.1|	hypothetical protein CGLO_00417 [Colletotrichum gloeosporioides Cg-14]	vda:VDAG_02726	ribosome biogenesis protein Sqt1; K14818 ribosome assembly protein SQT1	GO:0000027 ribosomal large subunit assembly	--	GO:0022626 cytosolic ribosome | GO:0005634 nucleus
CGLO_02251	3100.77	3099.93	-0.000391726	Down	0.999423	1332	EQB57593	gi|530478190|gb|EQB57593.1|	6-phosphofructo-2-kinase [Colletotrichum gloeosporioides Cg-14]	vda:VDAG_01248	fructose-2,6-bisphosphatase; K19029 6-phosphofructo-2-kinase / fructose-2,6-biphosphatase 2 [EC:2.7.1.105 3.1.3.46]	GO:0000462 maturation of SSU-rRNA from tricistronic rRNA transcript (SSU-rRNA, 5.8S rRNA, LSU-rRNA) | GO:0000463 maturation of LSU-rRNA from tricistronic rRNA transcript (SSU-rRNA, 5.8S rRNA, LSU-rRNA) | GO:0046835 carbohydrate phosphorylation | GO:0006003 fructose 2,6-bisphosphate metabolic process | GO:1990417 snoRNA release from pre-rRNA | GO:0006000 fructose metabolic process	GO:0003873 6-phosphofructo-2-kinase activity | GO:0003723 RNA binding | GO:0004004 ATP-dependent RNA helicase activity | GO:0005524 ATP binding	GO:0005730 nucleolus | GO:0030687 preribosome, large subunit precursor | GO:0005635 nuclear envelope
CGLO_15745	18.3513	16.7205	-0.134266	Down	0.955668	1527	EQB45388	gi|530462502|gb|EQB45388.1|	hypothetical protein CGLO_15745 [Colletotrichum gloeosporioides Cg-14]	ttt:THITE_2107910	hypothetical protein; K07824 benzoate 4-monooxygenase [EC:1.14.13.12]	GO:0055114 oxidation-reduction process	GO:0020037 heme binding | GO:0016705 oxidoreductase activity, acting on paired donors, with incorporation or reduction of molecular oxygen | GO:0004497 monooxygenase activity | GO:0005506 iron ion binding	GO:0016021 integral component of membrane
CGLO_06648	88.0921	64.1765	-0.456966	Down	0.633647	276	EQB53617	gi|530473131|gb|EQB53617.1|	hypothetical protein CGLO_06648 [Colletotrichum gloeosporioides Cg-14]	vda:VDAG_05771	mitochondrial cytochrome c oxidase assembly factor; K18187 protein PET100, fungi type	GO:0009060 aerobic respiration | GO:0033617 mitochondrial respiratory chain complex IV assembly	GO:0051082 unfolded protein binding	GO:0031305 integral component of mitochondrial inner membrane
CGLO_00594	308.851	255.963	-0.270973	Down	0.704562	606	EQB59074	gi|530479983|gb|EQB59074.1|	hypothetical protein CGLO_00594 [Colletotrichum gloeosporioides Cg-14]	tre:TRIREDRAFT_108081	hypothetical protein; K11557 kinetochore protein Spc24, fungi type	--	--	--
CGLO_09570	16.1664	20.5234	0.344275	Up	0.869833	1818	EQB50967	gi|530469895|gb|EQB50967.1|	hypothetical protein CGLO_09570 [Colletotrichum gloeosporioides Cg-14]	--	--	--	--	--
CGLO_09131	287.353	316.838	0.140921	Up	0.902858	2019	EQB51335	gi|530470341|gb|EQB51335.1|	hypothetical protein CGLO_09131 [Colletotrichum gloeosporioides Cg-14]	npa:UCRNP2_890	putative leucyl-trna synthetase protein; K01869 leucyl-tRNA synthetase [EC:6.1.1.4]	--	--	--
CGLO_07032	26.0806	38.0334	0.544288	Up	0.777873	2763	EQB53263	gi|530472708|gb|EQB53263.1|	hypothetical protein CGLO_07032 [Colletotrichum gloeosporioides Cg-14]	pno:SNOG_16555	hypothetical protein; K01336 cerevisin [EC:3.4.21.48]	GO:0006508 proteolysis	GO:0004252 serine-type endopeptidase activity	GO:0016020 membrane | GO:0005618 cell wall
CGLO_14278	680.487	631.627	-0.107495	Down	0.94343	732	EQB46646	gi|530464194|gb|EQB46646.1|	hypothetical protein CGLO_14278 [Colletotrichum gloeosporioides Cg-14]	--	--	--	--	GO:0016021 integral component of membrane
CGLO_12367	1.40906	2.0552	0.54455	Up	0.804831	1611	EQB48397	gi|530466617|gb|EQB48397.1|	hypothetical protein CGLO_12367 [Colletotrichum gloeosporioides Cg-14]	ani:AN1598.2	hypothetical protein; K21292 ent-kaurene oxidase [EC:1.14.13.78]	GO:0055114 oxidation-reduction process	GO:0020037 heme binding | GO:0016705 oxidoreductase activity, acting on paired donors, with incorporation or reduction of molecular oxygen | GO:0004497 monooxygenase activity | GO:0005506 iron ion binding	--
CGLO_08077	0.626866	0.502671	-0.318542	Down	0.834738	2004	EQB52317	gi|530471548|gb|EQB52317.1|	hypothetical protein CGLO_08077 [Colletotrichum gloeosporioides Cg-14]	dsq:DICSQDRAFT_153749	cellobiose dehydrogenase; K19069 cellobiose dehydrogenase (acceptor) [EC:1.1.99.18]	GO:0008152 metabolic process	GO:0003824 catalytic activity	--
CGLO_01005	0.531982	0.630205	0.244443	Up	0.870032	423	EQB58707	gi|530479534|gb|EQB58707.1|	hypothetical protein CGLO_01005 [Colletotrichum gloeosporioides Cg-14]	--	--	--	--	--
CGLO_12321	21.8129	18.4205	-0.243868	Down	0.936848	987	EQB48447	gi|530466682|gb|EQB48447.1|	monooxygenase [Colletotrichum gloeosporioides Cg-14]	fgr:FGSG_11106	hypothetical protein; K00505 tyrosinase [EC:1.14.18.1]	GO:0055114 oxidation-reduction process	GO:0004497 monooxygenase activity | GO:0046872 metal ion binding	--
CGLO_17212	95.8728	76.1336	-0.332589	Down	0.794246	750	EQB44075	gi|530460824|gb|EQB44075.1|	cytochrome b561 [Colletotrichum gloeosporioides Cg-14]	--	--	--	--	GO:0016021 integral component of membrane
CGLO_00952	129.122	120.287	-0.10225	Down	0.94343	1368	EQB58760	gi|530479601|gb|EQB58760.1|	uridine kinase [Colletotrichum gloeosporioides Cg-14]	vda:VDAG_10153	uridine kinase; K00876 uridine kinase [EC:2.7.1.48]	GO:0044211 CTP salvage | GO:0044206 UMP salvage | GO:0016310 phosphorylation	GO:0004849 uridine kinase activity | GO:0005524 ATP binding	GO:0032153 cell division site | GO:0005829 cytosol | GO:0044732 mitotic spindle pole body
CGLO_00379	310.412	309.229	-0.00550799	Down	0.995061	1692	EQB59282	gi|530480236|gb|EQB59282.1|	F-box domain-containing protein [Colletotrichum gloeosporioides Cg-14]	ure:UREG_02320	hypothetical protein; K00921 1-phosphatidylinositol-3-phosphate 5-kinase [EC:2.7.1.150]	--	--	--
CGLO_04502	2.7556	3.94477	0.517577	Up	0.841758	2883	EQB55557	gi|530475504|gb|EQB55557.1|	hypothetical protein CGLO_04502 [Colletotrichum gloeosporioides Cg-14]	mrr:Moror_11342	kinase-likeprotein; K17535 serine/threonine-protein kinase TNNI3K [EC:2.7.11.1]	--	GO:0005525 GTP binding	GO:0016021 integral component of membrane
CGLO_00940	6.85301	2.61231	-1.39141	Down	0.203509	1710	EQB58766	gi|530479611|gb|EQB58766.1|	hypothetical protein CGLO_00940 [Colletotrichum gloeosporioides Cg-14]	--	--	GO:0006357 regulation of transcription from RNA polymerase II promoter	GO:0000981 RNA polymerase II transcription factor activity, sequence-specific DNA binding | GO:0008270 zinc ion binding	GO:0005634 nucleus
CGLO_11121	3.9839	9.01096	1.1775	Up	0.323047	1035	EQB49529	gi|530468084|gb|EQB49529.1|	NmrA-like family protein [Colletotrichum gloeosporioides Cg-14]	ela:UCREL1_8069	putative nmral1 protein; K00140 malonate-semialdehyde dehydrogenase (acetylating) / methylmalonate-semialdehyde dehydrogenase [EC:1.2.1.18 1.2.1.27]	--	--	--
CGLO_12372	8.57056	5.64372	-0.602742	Down	0.775198	1992	EQB48402	gi|530466622|gb|EQB48402.1|	hypothetical protein CGLO_12372 [Colletotrichum gloeosporioides Cg-14]	--	--	--	--	--
CGLO_10021	1.712	1.59764	-0.0997461	Down	0.966181	705	EQB50526	gi|530469357|gb|EQB50526.1|	cutinase [Colletotrichum gloeosporioides Cg-14]	val:VDBG_06321	cutinase-2; K08095 cutinase [EC:3.1.1.74]	GO:0008152 metabolic process	GO:0050525 cutinase activity	GO:0005576 extracellular region
CGLO_05716	13.5944	19.0106	0.483786	Up	0.830277	408	EQB54451	gi|596665821|ref|XP_007275988.1|	mitochondrial processing peptidase alpha [Colletotrichum gloeosporioides Nara gc5] >gi|429860179|gb|ELA34924.1| mitochondrial processing peptidase alpha [Colletotrichum gloeosporioides Nara gc5]	val:VDBG_10198	mitochondrial-processing peptidase subunit alpha; K01412 mitochondrial-processing peptidase subunit alpha [EC:3.4.24.64]	GO:0006627 protein processing involved in protein targeting to mitochondrion	GO:0046872 metal ion binding | GO:0004222 metalloendopeptidase activity	GO:0017087 mitochondrial processing peptidase complex
CGLO_03550	40.5509	27.7955	-0.54488	Down	0.59589	549	EQB56440	gi|530476562|gb|EQB56440.1|	mediator complex protein [Colletotrichum gloeosporioides Cg-14]	--	--	GO:0006357 regulation of transcription from RNA polymerase II promoter	GO:0001104 RNA polymerase II transcription cofactor activity	GO:0016592 mediator complex
CGLO_03823	23.9751	18.399	-0.381911	Down	0.882806	1020	EQB56185	gi|530476258|gb|EQB56185.1|	retinol dehydrogenase 12 [Colletotrichum gloeosporioides Cg-14]	maw:MAC_01367	mitochondrial DnaJ chaperone (Mdj1), putative; K03686 molecular chaperone DnaJ	GO:0055114 oxidation-reduction process	GO:0016491 oxidoreductase activity	--
CGLO_14159	33.2746	28.9175	-0.202478	Down	0.911607	612	EQB46780	gi|530464366|gb|EQB46780.1|	nuclear distribution protein [Colletotrichum gloeosporioides Cg-14]	--	--	--	--	--
CGLO_04077	0.277161	0.303932	0.133025	Up	0.938616	768	EQB55936	gi|530475959|gb|EQB55936.1|	hypothetical protein CGLO_04077 [Colletotrichum gloeosporioides Cg-14]	maw:MAC_03710	transcriptional regulator, putative; K07734 transcriptional regulator	GO:0055114 oxidation-reduction process	GO:0016491 oxidoreductase activity | GO:0010181 FMN binding	--
CGLO_06110	17.2119	11.37	-0.598178	Down	0.693843	4833	EQB54094	gi|530473719|gb|EQB54094.1|	ABC transporter [Colletotrichum gloeosporioides Cg-14]	adl:AURDEDRAFT_92909	P-loop containing nucleoside triphosphate hydrolase protein; K05665 ATP-binding cassette, subfamily C (CFTR/MRP), member 1	GO:0055085 transmembrane transport | GO:0008152 metabolic process	GO:0042626 ATPase activity, coupled to transmembrane movement of substances | GO:0005524 ATP binding	GO:0016021 integral component of membrane
CGLO_12643	38.015	128.921	1.76185	Up	2.34e-05	1422	EQB48152	gi|530466296|gb|EQB48152.1|	hypothetical protein CGLO_12643 [Colletotrichum gloeosporioides Cg-14]	--	--	--	--	--
CGLO_14874	330.667	733.659	1.14973	Up	0.0509229	2088	EQB46126	gi|530463453|gb|EQB46126.1|	calcineurin-like phosphoesterase [Colletotrichum gloeosporioides Cg-14]	--	--	GO:0009166 nucleotide catabolic process	GO:0016787 hydrolase activity	GO:0000324 fungal-type vacuole | GO:0005829 cytosol
CGLO_03692	43.9445	142.206	1.69423	Up	0.0136638	2412	EQB56299	gi|530476395|gb|EQB56299.1|	hypothetical protein CGLO_03692 [Colletotrichum gloeosporioides Cg-14]	--	--	--	--	--
CGLO_02932	24.9513	70.4592	1.49767	Up	0.00182482	813	EQB57005	gi|530477452|gb|EQB57005.1|	hypothetical protein CGLO_02932 [Colletotrichum gloeosporioides Cg-14]	--	--	--	--	--
CGLO_12524	8.99957	16.0381	0.833574	Up	0.533827	2010	EQB48273	gi|530466463|gb|EQB48273.1|	hypothetical protein CGLO_12524 [Colletotrichum gloeosporioides Cg-14]	--	--	--	--	--
CGLO_07014	133.563	140.052	0.0684376	Up	0.957765	996	EQB53284	gi|530472732|gb|EQB53284.1|	Yip1 domain-containing protein [Colletotrichum gloeosporioides Cg-14]	maj:MAA_02323	hypothetical protein; K20363 protein transport protein YIP1	GO:0048280 vesicle fusion with Golgi apparatus | GO:0006888 ER to Golgi vesicle-mediated transport	--	GO:0005789 endoplasmic reticulum membrane | GO:0030134 ER to Golgi transport vesicle | GO:0030173 integral component of Golgi membrane
CGLO_11585	2352.2	1609.64	-0.547274	Down	0.0541403	1971	EQB49115	gi|530467557|gb|EQB49115.1|	hypothetical protein CGLO_11585 [Colletotrichum gloeosporioides Cg-14]	ani:AN4014.2	hypothetical protein; K20298 vacuolar protein sorting-associated protein 52	GO:0055114 oxidation-reduction process	GO:0016491 oxidoreductase activity	--
CGLO_10951	115.181	75.373	-0.611787	Down	0.316829	1038	EQB49685	gi|530468272|gb|EQB49685.1|	TAP42-like family protein [Colletotrichum gloeosporioides Cg-14]	tmn:UCRPA7_7882	putative type 2a phosphatase-associated protein 42 protein; K17606 immunoglobulin-binding protein 1	GO:0045943 positive regulation of transcription from RNA polymerase I promoter | GO:0031929 TOR signaling | GO:0009966 regulation of signal transduction	--	GO:0005829 cytosol | GO:0019898 extrinsic component of membrane | GO:0005634 nucleus
CGLO_14215	1477	1421.3	-0.0554619	Down	0.966181	873	EQB46715	gi|596694323|ref|XP_007281346.1|	inorganic pyrophosphatase [Colletotrichum gloeosporioides Nara gc5] >gi|429854566|gb|ELA29570.1| inorganic pyrophosphatase [Colletotrichum gloeosporioides Nara gc5] >gi|530464282|gb|EQB46715.1| inorganic pyrophosphatase [Colletotrichum gloeosporioides Cg-14]	fgr:FGSG_00496	inorganic pyrophosphatase; K01507 inorganic pyrophosphatase [EC:3.6.1.1]	GO:0006796 phosphate-containing compound metabolic process	GO:0004427 inorganic diphosphatase activity | GO:0000287 magnesium ion binding	GO:0005737 cytoplasm | GO:0005634 nucleus
CGLO_06179	33.6601	38.1781	0.181703	Up	0.932703	798	EQB54028	gi|530473638|gb|EQB54028.1|	hypothetical protein CGLO_06179 [Colletotrichum gloeosporioides Cg-14]	maw:MAC_08160	hypothetical protein; K03024 DNA-directed RNA polymerase III subunit RPC7	GO:0006359 regulation of transcription from RNA polymerase III promoter	GO:0003899 DNA-directed RNA polymerase activity	--
CGLO_08525	12.4968	15.9733	0.354097	Up	0.882361	240	EQB51885	gi|530471018|gb|EQB51885.1|	hypothetical protein CGLO_08525 [Colletotrichum gloeosporioides Cg-14]	pan:PODANSg09594	hypothetical protein; K02830 cell cycle checkpoint protein [EC:3.1.11.2]	--	--	GO:0016021 integral component of membrane
CGLO_11938	1832.5	1815.5	-0.0134472	Down	0.985284	789	EQB48795	gi|596666038|ref|XP_007276029.1|	40s ribosomal protein s4 [Colletotrichum gloeosporioides Nara gc5] >gi|429860169|gb|ELA34915.1| 40s ribosomal protein s4 [Colletotrichum gloeosporioides Nara gc5]	vda:VDAG_02543	40S ribosomal protein S4-A; K02987 small subunit ribosomal protein S4e	GO:0006412 translation	GO:0003735 structural constituent of ribosome | GO:0019843 rRNA binding	GO:0005840 ribosome
CGLO_08884	220.874	207.885	-0.0874333	Down	0.950831	2769	EQB51560	gi|530470617|gb|EQB51560.1|	hypothetical protein CGLO_08884 [Colletotrichum gloeosporioides Cg-14]	vda:VDAG_04597	hypothetical protein; K20475 protein transport protein SEC39	GO:0006890 retrograde vesicle-mediated transport, Golgi to ER	--	GO:0005622 intracellular
CGLO_09594	271.485	281.035	0.0498741	Up	0.966181	1362	EQB50922	gi|530469846|gb|EQB50922.1|	hypothetical protein CGLO_09594 [Colletotrichum gloeosporioides Cg-14]	--	--	--	--	--
CGLO_10674	22.7158	19.834	-0.19572	Down	0.938616	2184	EQB49942	gi|530468608|gb|EQB49942.1|	peptidase family M13 [Colletotrichum gloeosporioides Cg-14]	nhe:NECHADRAFT_43284	hypothetical protein; K01415 endothelin-converting enzyme [EC:3.4.24.71]	GO:0006508 proteolysis	GO:0004222 metalloendopeptidase activity	--
CGLO_14544	189.9	211.36	0.154461	Up	0.902858	1266	EQB46403	gi|530463850|gb|EQB46403.1|	glycerol-3-phosphate dehydrogenase [Colletotrichum gloeosporioides Cg-14]	tmn:UCRPA7_6676	putative glycerol-3-phosphate dehydrogenase protein; K00006 glycerol-3-phosphate dehydrogenase (NAD+) [EC:1.1.1.8]	GO:0005975 carbohydrate metabolic process | GO:0046168 glycerol-3-phosphate catabolic process | GO:0055114 oxidation-reduction process	GO:0051287 NAD binding | GO:0004367 glycerol-3-phosphate dehydrogenase [NAD+] activity	GO:0009331 glycerol-3-phosphate dehydrogenase complex
CGLO_06038	63.6641	33.9275	-0.908025	Down	0.227508	1482	EQB54162	gi|530473801|gb|EQB54162.1|	hypothetical protein CGLO_06038 [Colletotrichum gloeosporioides Cg-14]	--	--	--	--	--
CGLO_01088	102.274	96.3703	-0.0857727	Down	0.952065	1782	EQB58642	gi|530479456|gb|EQB58642.1|	hypothetical protein CGLO_01088 [Colletotrichum gloeosporioides Cg-14]	--	--	GO:0071805 potassium ion transmembrane transport	GO:0015079 potassium ion transmembrane transporter activity	GO:0005887 integral component of plasma membrane
CGLO_11088	8.39245	4.01608	-1.06331	Down	0.422281	1452	EQB49580	gi|530468138|gb|EQB49580.1|	glycosyl hydrolase family 76 [Colletotrichum gloeosporioides Cg-14]	vda:VDAG_09103	mannan endo-1,6-alpha-mannosidase DCW1; K08257 mannan endo-1,6-alpha-mannosidase [EC:3.2.1.101]	GO:0016052 carbohydrate catabolic process	GO:0008496 mannan endo-1,6-alpha-mannosidase activity	GO:0016021 integral component of membrane
CGLO_03483	79.3058	111.853	0.496103	Up	0.744129	1413	EQB56502	gi|530476633|gb|EQB56502.1|	proline dehydrogenase [Colletotrichum gloeosporioides Cg-14]	nhe:NECHADRAFT_10996	hypothetical protein; K14454 aspartate aminotransferase, cytoplasmic [EC:2.6.1.1]	GO:0006562 proline catabolic process | GO:0055114 oxidation-reduction process	GO:0004657 proline dehydrogenase activity	--
CGLO_13368	211.818	244.255	0.205561	Up	0.853363	2217	EQB47480	gi|530465390|gb|EQB47480.1|	hypothetical protein CGLO_13368 [Colletotrichum gloeosporioides Cg-14]	val:VDBG_09368	CASP; K09313 homeobox protein cut-like	GO:0006891 intra-Golgi vesicle-mediated transport	--	GO:0030173 integral component of Golgi membrane
CGLO_05326	14.2505	19.3499	0.441315	Up	0.828762	1599	EQB54788	gi|530474590|gb|EQB54788.1|	hypothetical protein CGLO_05326 [Colletotrichum gloeosporioides Cg-14]	--	--	GO:0055114 oxidation-reduction process	GO:0016491 oxidoreductase activity | GO:0016829 lyase activity	--
CGLO_12991	91.5518	98.1801	0.100843	Up	0.94343	585	EQB47837	gi|530465882|gb|EQB47837.1|	hypothetical protein CGLO_12991 [Colletotrichum gloeosporioides Cg-14]	vda:VDAG_05790	ADP-ribosylation factor 1; K07942 ADP-ribosylation factor-like protein 1	GO:0006623 protein targeting to vacuole | GO:0007264 small GTPase mediated signal transduction | GO:0043001 Golgi to plasma membrane protein transport | GO:0006897 endocytosis | GO:0008152 metabolic process	GO:0003924 GTPase activity | GO:0005525 GTP binding	GO:0005829 cytosol | GO:0005802 trans-Golgi network
CGLO_07856	0.284018	0.311452	0.133025	Up	0.938616	402	EQB52502	gi|530471770|gb|EQB52502.1|	hypothetical protein CGLO_07856 [Colletotrichum gloeosporioides Cg-14]	--	--	--	--	--
CGLO_07923	7.19015	9.31066	0.372861	Up	0.902858	1632	EQB52457	gi|530471715|gb|EQB52457.1|	hypothetical protein CGLO_07923 [Colletotrichum gloeosporioides Cg-14]	cnb:CNBH3340	hypothetical protein; K08141 MFS transporter, SP family, general alpha glucoside:H+ symporter	GO:0055085 transmembrane transport	GO:0022857 transmembrane transporter activity	GO:0016021 integral component of membrane
CGLO_08299	3.40055	4.37643	0.363986	Up	0.902858	507	EQB52099	gi|530471286|gb|EQB52099.1|	hypothetical protein CGLO_08299 [Colletotrichum gloeosporioides Cg-14]	--	--	GO:0055114 oxidation-reduction process	GO:0004497 monooxygenase activity	--
CGLO_11686	20.5265	16.9004	-0.280431	Down	0.902858	1908	EQB49017	gi|530467423|gb|EQB49017.1|	hypothetical protein CGLO_11686 [Colletotrichum gloeosporioides Cg-14]	--	--	--	--	--
CGLO_02274	37.2476	50.1939	0.430366	Up	0.753692	582	EQB57581	gi|530478172|gb|EQB57581.1|	hypothetical protein CGLO_02274 [Colletotrichum gloeosporioides Cg-14]	pte:PTT_08612	hypothetical protein; K01626 3-deoxy-7-phosphoheptulonate synthase [EC:2.5.1.54]	--	--	--
CGLO_04896	34.8494	40.2237	0.206912	Up	0.904073	543	EQB55200	gi|596682298|ref|XP_007279071.1|	cell division control protein 31 [Colletotrichum gloeosporioides Nara gc5] >gi|429856954|gb|ELA31842.1| cell division control protein 31 [Colletotrichum gloeosporioides Nara gc5]	val:VDBG_09277	hypothetical protein; K16466 centrin-3	GO:0033047 regulation of mitotic sister chromatid segregation | GO:0034613 cellular protein localization | GO:1903087 mitotic spindle pole body duplication | GO:0043549 regulation of kinase activity | GO:0007096 regulation of exit from mitosis | GO:0043161 proteasome-mediated ubiquitin-dependent protein catabolic process | GO:0007020 microtubule nucleation	GO:0005509 calcium ion binding | GO:0042802 identical protein binding | GO:0005200 structural constituent of cytoskeleton	GO:0000111 nucleotide-excision repair factor 2 complex | GO:0005829 cytosol | GO:0044732 mitotic spindle pole body | GO:0070390 transcription export complex 2 | GO:0005825 half bridge of spindle pole body
CGLO_09657	90.9434	35.7161	-1.34839	Down	0.00525759	849	EQB50852	gi|530469760|gb|EQB50852.1|	hypothetical protein CGLO_09657 [Colletotrichum gloeosporioides Cg-14]	--	--	--	--	GO:0016021 integral component of membrane
CGLO_17524	335.47	370.69	0.144031	Up	0.902858	1938	EQB43783	gi|530460468|gb|EQB43783.1|	INO80 chromatin remodeling complex Ies1 [Colletotrichum gloeosporioides Cg-14]	vda:VDAG_01372	INO80 chromatin remodeling complex Ies1; K11675 Ino eighty subunit 1	GO:0042766 nucleosome mobilization	--	GO:0031011 Ino80 complex | GO:0005829 cytosol
CGLO_05570	154.26	133.448	-0.209081	Down	0.853363	729	EQB54573	gi|530474323|gb|EQB54573.1|	emopamil binding protein [Colletotrichum gloeosporioides Cg-14]	pfp:PFL1_03075	hypothetical protein; K03844 alpha-1,2-mannosyltransferase [EC:2.4.1.131]	GO:0016125 sterol metabolic process	GO:0047750 cholestenol delta-isomerase activity	GO:0016021 integral component of membrane
CGLO_08183	438.548	427.363	-0.0372714	Down	0.983311	2274	EQB52213	gi|530471429|gb|EQB52213.1|	hypothetical protein CGLO_08183 [Colletotrichum gloeosporioides Cg-14]	tre:TRIREDRAFT_123827	bifunctional catalase/peroxidase; K03782 catalase-peroxidase [EC:1.11.1.21]	GO:0098869 cellular oxidant detoxification | GO:0055114 oxidation-reduction process | GO:0006979 response to oxidative stress	GO:0020037 heme binding | GO:0046872 metal ion binding | GO:0004096 catalase activity	--
CGLO_14731	0.189351	0.175782	-0.107279	Down	0.94343	1047	EQB46238	gi|530463606|gb|EQB46238.1|	hypothetical protein CGLO_14731 [Colletotrichum gloeosporioides Cg-14]	ure:UREG_00738	hypothetical protein; K12584 m7GpppX diphosphatase [EC:3.6.1.59]	GO:0032259 methylation	GO:0008168 methyltransferase activity	--
CGLO_05020	4.13792	5.32249	0.363196	Up	0.902858	1437	EQB55080	gi|530474926|gb|EQB55080.1|	hypothetical protein CGLO_05020 [Colletotrichum gloeosporioides Cg-14]	pte:PTT_09298	hypothetical protein; K02359 egghead protein (zeste-white 4 protein)	GO:0097502 mannosylation	GO:0019187 beta-1,4-mannosyltransferase activity	GO:0016021 integral component of membrane
CGLO_11437	0.691621	0.832996	0.268328	Up	0.853363	420	EQB49235	gi|596664690|ref|XP_007275782.1|	short-chain dehydrogenase reductase sdr [Colletotrichum gloeosporioides Nara gc5] >gi|429860408|gb|ELA35147.1| short-chain dehydrogenase reductase sdr [Colletotrichum gloeosporioides Nara gc5]	mlr:MELLADRAFT_77343	hypothetical protein; K17742 sorbose reductase [EC:1.1.1.289]	GO:0055114 oxidation-reduction process	GO:0016491 oxidoreductase activity	--
CGLO_10215	0.917157	1.18999	0.375712	Up	0.853363	1815	EQB50346	gi|530469119|gb|EQB50346.1|	hypothetical protein CGLO_10215 [Colletotrichum gloeosporioides Cg-14]	nhe:NECHADRAFT_106289	hypothetical protein; K01195 beta-glucuronidase [EC:3.2.1.31]	GO:0005975 carbohydrate metabolic process	GO:0004553 hydrolase activity, hydrolyzing O-glycosyl compounds	--
CGLO_08955	380.941	314.631	-0.275907	Down	0.726726	1194	EQB51493	gi|530470536|gb|EQB51493.1|	hypothetical protein CGLO_08955 [Colletotrichum gloeosporioides Cg-14]	vda:VDAG_00495	END3 protein; K20048 actin cytoskeleton-regulatory complex protein END3	GO:0007015 actin filament organization | GO:0006897 endocytosis | GO:0030476 ascospore wall assembly	GO:0030674 protein binding, bridging | GO:0005509 calcium ion binding	GO:0043332 mating projection tip
CGLO_14803	119.667	125.697	0.0709204	Up	0.966181	3279	EQB46172	gi|530463513|gb|EQB46172.1|	RNA recognition domain-containing protein [Colletotrichum gloeosporioides Cg-14]	pco:PHACADRAFT_249208	hypothetical protein; K11294 nucleolin	GO:0000245 spliceosomal complex assembly | GO:0000244 spliceosomal tri-snRNP complex assembly	GO:0017070 U6 snRNA binding | GO:0000166 nucleotide binding	GO:0005688 U6 snRNP
CGLO_09703	1.26722	1.36613	0.108426	Up	0.966181	1539	EQB50827	gi|530469725|gb|EQB50827.1|	major facilitator superfamily transporter [Colletotrichum gloeosporioides Cg-14]	aor:AOR_1_978154	AO090003000559; ccr4-Not transcription complex subunit (NOT1); K12604 CCR4-NOT transcription complex subunit 1	GO:0055114 oxidation-reduction process | GO:0055085 transmembrane transport	GO:0020037 heme binding | GO:0016705 oxidoreductase activity, acting on paired donors, with incorporation or reduction of molecular oxygen | GO:0005506 iron ion binding	GO:0016021 integral component of membrane
CGLO_12532	2997.98	1480.46	-1.01794	Down	0.0402971	2286	EQB48252	gi|530466437|gb|EQB48252.1|	hypothetical protein CGLO_12532 [Colletotrichum gloeosporioides Cg-14]	--	--	--	GO:0008270 zinc ion binding | GO:0003676 nucleic acid binding	--
CGLO_17548	8.11892	23.6467	1.54228	Up	0.0307896	549	EQB43767	gi|530460444|gb|EQB43767.1|	hypothetical protein CGLO_17548 [Colletotrichum gloeosporioides Cg-14]	--	--	--	--	GO:0016021 integral component of membrane
CGLO_10173	44.3229	31.386	-0.49793	Down	0.580339	1188	EQB50398	gi|530469181|gb|EQB50398.1|	fatty acid desaturase [Colletotrichum gloeosporioides Cg-14]	nhe:NECHADRAFT_102202	hypothetical protein; K10256 omega-6 fatty acid desaturase / acyl-lipid omega-6 desaturase (Delta-12 desaturase) [EC:1.14.19.6 1.14.19.22]	GO:0006629 lipid metabolic process	--	GO:0016021 integral component of membrane
CGLO_04735	284.865	265.796	-0.0999588	Down	0.936596	801	EQB55350	gi|530475250|gb|EQB55350.1|	translin [Colletotrichum gloeosporioides Cg-14]	ela:UCREL1_7938	putative recombination hotspot-binding protein; K05287 phosphatidylinositol glycan, class F [EC:2.7.-.-]	--	GO:0035939 microsatellite binding | GO:1990605 GU repeat RNA binding | GO:0043047 single-stranded telomeric DNA binding	GO:0005829 cytosol | GO:0005634 nucleus
CGLO_01724	5.31807	7.40276	0.47716	Up	0.853363	2040	EQB58074	gi|530478763|gb|EQB58074.1|	hypothetical protein CGLO_01724 [Colletotrichum gloeosporioides Cg-14]	npa:UCRNP2_7982	putative glucan synthase protein; K00706 1,3-beta-glucan synthase [EC:2.4.1.34]	--	--	--
CGLO_16761	558.294	580.65	0.0566419	Up	0.966181	843	EQB44490	gi|530461359|gb|EQB44490.1|	hypothetical protein CGLO_16761 [Colletotrichum gloeosporioides Cg-14]	--	--	--	--	GO:0016021 integral component of membrane
CGLO_00896	21.9442	24.5977	0.164682	Up	0.94343	999	EQB58819	gi|530479672|gb|EQB58819.1|	hypothetical protein CGLO_00896 [Colletotrichum gloeosporioides Cg-14]	--	--	--	--	--
CGLO_16539	50.0677	38.4913	-0.379348	Down	0.901249	1437	EQB44695	gi|530461624|gb|EQB44695.1|	hypothetical protein CGLO_16539 [Colletotrichum gloeosporioides Cg-14]	--	--	--	--	GO:0016021 integral component of membrane
CGLO_14347	11.3932	22.8337	1.00299	Up	0.246264	3141	EQB46588	gi|530464110|gb|EQB46588.1|	hypothetical protein CGLO_14347 [Colletotrichum gloeosporioides Cg-14]	afv:AFLA_005130	L-lysine 2,3-aminomutase, putative; K01843 lysine 2,3-aminomutase [EC:5.4.3.2]	--	--	--
CGLO_08847	641.73	485.375	-0.402867	Down	0.559201	5451	EQB51596	gi|530470661|gb|EQB51596.1|	acyl-CoA ligase [Colletotrichum gloeosporioides Cg-14]	--	--	GO:0008152 metabolic process	GO:0016874 ligase activity	GO:0032153 cell division site | GO:0072686 mitotic spindle
CGLO_14607	3.83488	3.22522	-0.249785	Down	0.938616	915	EQB46342	gi|530463767|gb|EQB46342.1|	hypothetical protein CGLO_14607 [Colletotrichum gloeosporioides Cg-14]	--	--	GO:0008152 metabolic process	GO:0050662 coenzyme binding | GO:0003824 catalytic activity	--
CGLO_00355	214.887	159.821	-0.427123	Down	0.451059	429	EQB59285	gi|596690284|ref|XP_007280594.1|	hypothetical protein CGGC5_9392 [Colletotrichum gloeosporioides Nara gc5] >gi|429855342|gb|ELA30300.1| hypothetical protein CGGC5_9392 [Colletotrichum gloeosporioides Nara gc5] >gi|530480241|gb|EQB59285.1| hypothetical protein CGLO_00355 [Colletotrichum gloeosporioides Cg-14]	--	--	--	--	--
CGLO_06456	56.3566	71.0572	0.334398	Up	0.842759	846	EQB53797	gi|530473341|gb|EQB53797.1|	phosphoglycerate mutase [Colletotrichum gloeosporioides Cg-14]	wic:J056_002519	putative phosphoglycerate mutase; K15634 probable phosphoglycerate mutase [EC:5.4.2.12]	GO:0008152 metabolic process	GO:0003824 catalytic activity	GO:0005634 nucleus
CGLO_00309	9.74927	7.43329	-0.391294	Down	0.898156	1539	EQB59325	gi|530480294|gb|EQB59325.1|	hypothetical protein CGLO_00309 [Colletotrichum gloeosporioides Cg-14]	--	--	--	--	--
CGLO_12468	106.539	81.8215	-0.380832	Down	0.725022	666	EQB48317	gi|596650763|ref|XP_007273175.1|	60s ribosomal protein l3 [Colletotrichum gloeosporioides Nara gc5] >gi|429863300|gb|ELA37774.1| 60s ribosomal protein l3 [Colletotrichum gloeosporioides Nara gc5]	cthr:CTHT_0002510	hypothetical protein; K15218 RNA polymerase I-specific transcription initiation factor RRN6	--	--	GO:0005840 ribosome
CGLO_02615	759.294	464.059	-0.710352	Down	0.0325984	1221	EQB57282	gi|530477800|gb|EQB57282.1|	hypothetical protein CGLO_02615 [Colletotrichum gloeosporioides Cg-14]	mbe:MBM_05348	formate dehydrogenase; K00122 formate dehydrogenase [EC:1.2.1.2]	--	--	GO:0016021 integral component of membrane
CGLO_03084	163.789	177.893	0.119167	Up	0.913256	333	EQB56868	gi|530477281|gb|EQB56868.1|	NADH:ubiquinone oxidoreductase 11.6kD subunit [Colletotrichum gloeosporioides Cg-14]	cthr:CTHT_0042860	DNA replication ATP-dependent helicase dna2-like protein; K10742 DNA replication ATP-dependent helicase Dna2 [EC:3.6.4.12]	--	--	GO:0016021 integral component of membrane
CGLO_08013	121.203	68.5886	-0.821386	Down	0.368678	1056	EQB52375	gi|530471618|gb|EQB52375.1|	hypothetical protein CGLO_08013 [Colletotrichum gloeosporioides Cg-14]	ure:UREG_00738	hypothetical protein; K12584 m7GpppX diphosphatase [EC:3.6.1.59]	GO:0032259 methylation	GO:0008168 methyltransferase activity	--
CGLO_06937	2787.15	3326.71	0.255303	Up	0.699674	1134	EQB53348	gi|530472816|gb|EQB53348.1|	hypothetical protein CGLO_06937 [Colletotrichum gloeosporioides Cg-14]	fgr:FGSG_04091	hypothetical protein; K16365 small glutamine-rich tetratricopeptide repeat-containing protein alpha	GO:0006620 posttranslational protein targeting to membrane | GO:0009408 response to heat	GO:0032947 protein complex scaffold	GO:0072380 TRC complex | GO:0005634 nucleus
CGLO_12485	0.425164	0.373378	-0.18738	Down	0.902858	1164	EQB48286	gi|530466483|gb|EQB48286.1|	hypothetical protein CGLO_12485 [Colletotrichum gloeosporioides Cg-14]	ani:AN9039.2	hypothetical protein; K01613 phosphatidylserine decarboxylase [EC:4.1.1.65]	--	--	GO:0016021 integral component of membrane
CGLO_02517	0.400258	0.488316	0.286884	Up	0.869833	975	EQB57369	gi|530477912|gb|EQB57369.1|	hypothetical protein CGLO_02517 [Colletotrichum gloeosporioides Cg-14]	afv:AFLA_005310	vacuolar ATP synthase proteolipid subunit, putative; K02155 V-type H+-transporting ATPase 16kDa proteolipid subunit	GO:0009116 nucleoside metabolic process	GO:0003824 catalytic activity	--
CGLO_05433	70.7554	83.1268	0.232474	Up	0.90853	603	EQB54695	gi|530474478|gb|EQB54695.1|	hypothetical protein CGLO_05433 [Colletotrichum gloeosporioides Cg-14]	ani:AN3376.2	hypothetical protein; K00801 farnesyl-diphosphate farnesyltransferase [EC:2.5.1.21]	--	--	--
CGLO_04446	0.349448	0.342927	-0.0271774	Down	0.979526	1143	EQB55614	gi|530475573|gb|EQB55614.1|	hypothetical protein CGLO_04446 [Colletotrichum gloeosporioides Cg-14]	ani:AN3146.2	hypothetical protein; K14950 cation-transporting ATPase 13A1 [EC:3.6.3.-]	--	--	GO:0016021 integral component of membrane
CGLO_15027	29.6031	42.7529	0.530273	Up	0.719246	1125	EQB46007	gi|530463291|gb|EQB46007.1|	inositol polyphosphate kinase [Colletotrichum gloeosporioides Cg-14]	vda:VDAG_07986	inositol polyphosphate multikinase; K00915 inositol-polyphosphate multikinase [EC:2.7.1.140 2.7.1.151]	GO:0000122 negative regulation of transcription from RNA polymerase II promoter | GO:0050821 protein stabilization | GO:0032958 inositol phosphate biosynthetic process | GO:0000821 regulation of arginine metabolic process | GO:0045944 positive regulation of transcription from RNA polymerase II promoter | GO:0046854 phosphatidylinositol phosphorylation	GO:0035004 phosphatidylinositol 3-kinase activity | GO:0000827 inositol-1,3,4,5,6-pentakisphosphate kinase activity | GO:0030674 protein binding, bridging | GO:0000825 inositol tetrakisphosphate 6-kinase activity | GO:0000823 inositol-1,4,5-trisphosphate 6-kinase activity | GO:0000824 inositol tetrakisphosphate 3-kinase activity | GO:0008440 inositol-1,4,5-trisphosphate 3-kinase activity	GO:0005829 cytosol | GO:0005634 nucleus
CGLO_00733	1379.27	949.669	-0.538406	Down	0.121414	1692	EQB58945	gi|530479827|gb|EQB58945.1|	hypothetical protein CGLO_00733 [Colletotrichum gloeosporioides Cg-14]	cmt:CCM_03421	urea active transporter; K20989 urea-proton symporter	GO:0055085 transmembrane transport	GO:0005215 transporter activity	GO:0016021 integral component of membrane
CGLO_08903	1029.39	762.632	-0.432727	Down	0.597331	471	EQB51556	gi|530470611|gb|EQB51556.1|	hypothetical protein CGLO_08903 [Colletotrichum gloeosporioides Cg-14]	tmn:UCRPA7_2812	putative duf1348-domain-containing protein; K09958 uncharacterized protein	--	--	--
CGLO_15040	5.15283	5.76143	0.161061	Up	0.958869	2256	EQB45986	gi|530463267|gb|EQB45986.1|	IBR domain-containing protein [Colletotrichum gloeosporioides Cg-14]	bsc:COCSADRAFT_300717	hypothetical protein; K11968 ariadne-1 [EC:2.3.2.27]	GO:0016567 protein ubiquitination	GO:0003676 nucleic acid binding | GO:0008270 zinc ion binding | GO:0004842 ubiquitin-protein transferase activity	--
CGLO_01935	353.716	403.935	0.191532	Up	0.865613	1578	EQB57883	gi|530478535|gb|EQB57883.1|	hypothetical protein CGLO_01935 [Colletotrichum gloeosporioides Cg-14]	ttt:THITE_2119543	hypothetical protein; K14154 thiamine-phosphate diphosphorylase / hydroxyethylthiazole kinase [EC:2.5.1.3 2.7.1.50]	GO:0009228 thiamine biosynthetic process | GO:0016310 phosphorylation	GO:0004789 thiamine-phosphate diphosphorylase activity | GO:0004417 hydroxyethylthiazole kinase activity	GO:0005829 cytosol
CGLO_04424	10821.1	11622.1	0.103025	Up	0.94343	1014	EQB55630	gi|530475592|gb|EQB55630.1|	F-box domain-containing protein [Colletotrichum gloeosporioides Cg-14]	--	--	--	--	--
CGLO_08751	1034.86	1448.12	0.484743	Up	0.411407	1845	EQB51682	gi|530470774|gb|EQB51682.1|	hypothetical protein CGLO_08751 [Colletotrichum gloeosporioides Cg-14]	pan:PODANSg09511	hypothetical protein; K03283 heat shock 70kDa protein 1/8	--	GO:0005524 ATP binding	GO:0005829 cytosol
CGLO_07112	7.78766	18.0566	1.21327	Up	0.283884	1323	EQB53191	gi|530472619|gb|EQB53191.1|	hypothetical protein CGLO_07112 [Colletotrichum gloeosporioides Cg-14]	--	--	--	--	--
CGLO_09645	31.6938	53.6099	0.758302	Up	0.266104	1191	EQB50872	gi|530469784|gb|EQB50872.1|	hypothetical protein CGLO_09645 [Colletotrichum gloeosporioides Cg-14]	ani:AN9039.2	hypothetical protein; K01613 phosphatidylserine decarboxylase [EC:4.1.1.65]	--	--	GO:0016021 integral component of membrane
CGLO_11786	219.374	220.717	0.00880638	Up	0.989324	1476	EQB48910	gi|530467288|gb|EQB48910.1|	autophagy protein Apg6 [Colletotrichum gloeosporioides Cg-14]	tmn:UCRPA7_3645	putative autophagy protein; K08334 beclin	GO:0042147 retrograde transport, endosome to Golgi | GO:0016236 macroautophagy | GO:0045324 late endosome to vacuole transport | GO:0032258 CVT pathway | GO:0034727 piecemeal microautophagy of nucleus | GO:0030433 ER-associated ubiquitin-dependent protein catabolic process | GO:0036092 phosphatidylinositol-3-phosphate biosynthetic process | GO:0030242 pexophagy	GO:0016303 1-phosphatidylinositol-3-kinase activity	GO:0034272 phosphatidylinositol 3-kinase complex, class III, type II | GO:0034271 phosphatidylinositol 3-kinase complex, class III, type I | GO:0005737 cytoplasm
CGLO_12597	8.71526	5.87108	-0.569917	Down	0.767083	264	EQB48187	gi|530466341|gb|EQB48187.1|	hypothetical protein CGLO_12597 [Colletotrichum gloeosporioides Cg-14]	--	--	GO:0005975 carbohydrate metabolic process	GO:0004557 alpha-galactosidase activity	--
CGLO_14492	157.456	186.863	0.247034	Up	0.775783	3261	EQB46452	gi|530463923|gb|EQB46452.1|	hypothetical protein CGLO_14492 [Colletotrichum gloeosporioides Cg-14]	nhe:NECHADRAFT_100996	hypothetical protein; K12479 vacuolar protein sorting-associated protein 45	GO:0048210 Golgi vesicle fusion to target membrane | GO:0032258 CVT pathway | GO:0006904 vesicle docking involved in exocytosis | GO:0035543 positive regulation of SNARE complex assembly | GO:0007035 vacuolar acidification | GO:0006896 Golgi to vacuole transport | GO:0002098 tRNA wobble uridine modification | GO:0055114 oxidation-reduction process | GO:0006895 Golgi to endosome transport | GO:000…	GO:0050660 flavin adenine dinucleotide binding | GO:0000149 SNARE binding | GO:0016491 oxidoreductase activity | GO:0051082 unfolded protein binding	GO:0000139 Golgi membrane | GO:0005829 cytosol | GO:0031201 SNARE complex | GO:0019898 extrinsic component of membrane
CGLO_15109	110.304	65.722	-0.747035	Down	0.430338	942	EQB45941	gi|530463205|gb|EQB45941.1|	hypothetical protein CGLO_15109 [Colletotrichum gloeosporioides Cg-14]	afv:AFLA_065740	7-dehydrocholesterol reductase, putative; K00213 7-dehydrocholesterol reductase [EC:1.3.1.21]	--	--	--
CGLO_10039	373.662	369.296	-0.0169547	Down	0.982851	1512	EQB50509	gi|530469336|gb|EQB50509.1|	hypothetical protein CGLO_10039 [Colletotrichum gloeosporioides Cg-14]	vda:VDAG_06428	MSS51 protein; K17656 mitochondrial splicing suppressor protein 51	GO:0070131 positive regulation of mitochondrial translation | GO:0097034 mitochondrial respiratory chain complex IV biogenesis	GO:0045182 translation regulator activity	GO:0031314 extrinsic component of mitochondrial inner membrane
CGLO_11227	0.947603	1.14676	0.275212	Up	0.89522	744	EQB49435	gi|530467957|gb|EQB49435.1|	hypothetical protein CGLO_11227 [Colletotrichum gloeosporioides Cg-14]	--	--	--	--	--
CGLO_00544	32.7259	36.261	0.147987	Up	0.938616	1749	EQB59110	gi|530480032|gb|EQB59110.1|	sodium/hydrogen exchanger family protein [Colletotrichum gloeosporioides Cg-14]	--	--	GO:1902600 hydrogen ion transmembrane transport	GO:0015299 solute:proton antiporter activity	GO:0016021 integral component of membrane
CGLO_04203	36.2777	397.029	3.45209	Up	8.7e-22	732	EQB55832	gi|530475828|gb|EQB55832.1|	hypothetical protein CGLO_04203 [Colletotrichum gloeosporioides Cg-14]	--	--	GO:0008152 metabolic process	GO:0016740 transferase activity	--
CGLO_03958	5.8256	15.6295	1.42379	Up	0.174936	1080	EQB56057	gi|530476112|gb|EQB56057.1|	hypothetical protein CGLO_03958 [Colletotrichum gloeosporioides Cg-14]	nfi:NFIA_003850	NAD-binding Rossmann fold oxidoreductase family protein; K00010 myo-inositol 2-dehydrogenase / D-chiro-inositol 1-dehydrogenase [EC:1.1.1.18 1.1.1.369]	GO:0055114 oxidation-reduction process	GO:0016491 oxidoreductase activity	--
CGLO_04035	33.4816	62.4467	0.899255	Up	0.117826	849	EQB55977	gi|596727451|ref|XP_007287468.1|	bud site selection protein [Colletotrichum gloeosporioides Nara gc5] >gi|429847891|gb|ELA23438.1| bud site selection protein [Colletotrichum gloeosporioides Nara gc5]	tmn:UCRPA7_233	putative methyltransferase domain-containing protein; K19306 18S rRNA (guanine1575-N7)-methyltransferase [EC:2.1.1.309]	GO:0000282 cellular bud site selection | GO:0000056 ribosomal small subunit export from nucleus | GO:0000447 endonucleolytic cleavage in ITS1 to separate SSU-rRNA from 5.8S rRNA and LSU-rRNA from tricistronic rRNA transcript (SSU-rRNA, 5.8S rRNA, LSU-rRNA) | GO:0070476 rRNA (guanine-N7)-methylation	GO:0016435 rRNA (guanine) methyltransferase activity	GO:0005829 cytosol | GO:0005730 nucleolus
CGLO_15510	401.831	389.128	-0.0463448	Down	0.966181	3225	EQB45590	gi|530462754|gb|EQB45590.1|	isoleucyl-tRNA synthetase [Colletotrichum gloeosporioides Cg-14]	nte:NEUTE1DRAFT66205	NEUTE1DRAFT_66205; hypothetical protein; K01870 isoleucyl-tRNA synthetase [EC:6.1.1.5]	GO:0006428 isoleucyl-tRNA aminoacylation | GO:0006450 regulation of translational fidelity	GO:0004822 isoleucine-tRNA ligase activity | GO:0002161 aminoacyl-tRNA editing activity | GO:0005524 ATP binding	GO:0005829 cytosol
CGLO_10311	497.769	530.074	0.090716	Up	0.94343	1479	EQB50266	gi|530469025|gb|EQB50266.1|	phenylalanyl-tRNA synthetase [Colletotrichum gloeosporioides Cg-14]	val:VDBG_05420	phenylalanyl-tRNA synthetase; K01889 phenylalanyl-tRNA synthetase alpha chain [EC:6.1.1.20]	GO:0008033 tRNA processing | GO:0070156 mitochondrial phenylalanyl-tRNA aminoacylation	GO:0005524 ATP binding | GO:0004826 phenylalanine-tRNA ligase activity | GO:0000287 magnesium ion binding | GO:0000049 tRNA binding	GO:0005739 mitochondrion
CGLO_17727	87.6894	98.5014	0.167742	Up	0.914455	2388	EQB43600	gi|530460226|gb|EQB43600.1|	phosphatidylinositol 3 [Colletotrichum gloeosporioides Cg-14]	vda:VDAG_08987	phosphatidylinositol 4-kinase LSB6; K13711 phosphatidylinositol 4-kinase type 2 [EC:2.7.1.67]	GO:0046854 phosphatidylinositol phosphorylation	GO:0004430 1-phosphatidylinositol 4-kinase activity	GO:0000329 fungal-type vacuole membrane | GO:0005794 Golgi apparatus | GO:0005886 plasma membrane | GO:0032153 cell division site
CGLO_10224	42.9246	32.0903	-0.419664	Down	0.780415	1512	EQB50355	gi|530469128|gb|EQB50355.1|	hypothetical protein CGLO_10224 [Colletotrichum gloeosporioides Cg-14]	ssl:SS1G_10951	hypothetical protein; K01501 nitrilase [EC:3.5.5.1]	GO:0055114 oxidation-reduction process	GO:0050660 flavin adenine dinucleotide binding | GO:0016614 oxidoreductase activity, acting on CH-OH group of donors	--
CGLO_10469	22.8409	20.7691	-0.137185	Down	0.952646	972	EQB50118	gi|530468834|gb|EQB50118.1|	fungal trichothecene efflux pump [Colletotrichum gloeosporioides Cg-14]	nhe:NECHADRAFT_65858	hypothetical protein; K10866 DNA repair protein RAD50 [EC:3.6.-.-]	GO:0055085 transmembrane transport	GO:0005215 transporter activity	GO:0016021 integral component of membrane
CGLO_04003	0.277161	0.303932	0.133025	Up	0.938616	2280	EQB56012	gi|530476054|gb|EQB56012.1|	hypothetical protein CGLO_04003 [Colletotrichum gloeosporioides Cg-14]	ncr:NCU00776	T; tyrosinase; K00505 tyrosinase [EC:1.14.18.1]	GO:0055114 oxidation-reduction process	GO:0046872 metal ion binding | GO:0016491 oxidoreductase activity	--
CGLO_06844	12.2256	17.5653	0.522831	Up	0.775756	597	EQB53407	gi|530472889|gb|EQB53407.1|	hypothetical protein CGLO_06844 [Colletotrichum gloeosporioides Cg-14]	pcs:Pc22g20170	Pc22g20170; K11426 SET and MYND domain-containing protein	--	GO:0046872 metal ion binding	--
CGLO_18133	0.373852	0.328316	-0.18738	Down	0.902858	1815	EQB43232	gi|530459701|gb|EQB43232.1|	hypothetical protein CGLO_18133 [Colletotrichum gloeosporioides Cg-14]	--	--	GO:0030001 metal ion transport | GO:0055085 transmembrane transport	GO:0046873 metal ion transmembrane transporter activity	GO:0016021 integral component of membrane
CGLO_09859	692.841	1445.45	1.06092	Up	0.19238	1212	EQB50677	gi|530469545|gb|EQB50677.1|	hypothetical protein CGLO_09859 [Colletotrichum gloeosporioides Cg-14]	--	--	GO:0055114 oxidation-reduction process	GO:0051213 dioxygenase activity	--
CGLO_01378	18.2101	6.71699	-1.43885	Down	0.125839	804	EQB58379	gi|530479129|gb|EQB58379.1|	hypothetical protein CGLO_01378 [Colletotrichum gloeosporioides Cg-14]	--	--	--	--	--
CGLO_12177	387.145	231.309	-0.74305	Down	0.0179132	2034	EQB48581	gi|530466850|gb|EQB48581.1|	hypothetical protein CGLO_12177 [Colletotrichum gloeosporioides Cg-14]	aor:AOR_1_564094	AO090120000322; hypothetical protein; K10777 DNA ligase 4 [EC:6.5.1.1]	GO:0006357 regulation of transcription from RNA polymerase II promoter	GO:0008270 zinc ion binding | GO:0000981 RNA polymerase II transcription factor activity, sequence-specific DNA binding | GO:0003677 DNA binding	GO:0005634 nucleus
CGLO_01730	42.2251	38.7755	-0.122955	Down	0.94343	2946	EQB58071	gi|530478759|gb|EQB58071.1|	hypothetical protein CGLO_01730 [Colletotrichum gloeosporioides Cg-14]	zro:ZYRO0B06820g	hypothetical protein; K11244 cell wall integrity and stress response component	--	--	--
CGLO_09068	870.451	791.135	-0.137841	Down	0.887019	495	EQB51386	gi|530470401|gb|EQB51386.1|	hypothetical protein CGLO_09068 [Colletotrichum gloeosporioides Cg-14]	nhe:NECHADRAFT_102538	40S ribosomal protein S25; K02975 small subunit ribosomal protein S25e	--	--	GO:0005840 ribosome
CGLO_13307	178.66	132.612	-0.430004	Down	0.477354	993	EQB47530	gi|530465472|gb|EQB47530.1|	THUMP domain-containing protein [Colletotrichum gloeosporioides Cg-14]	vda:VDAG_09442	hypothetical protein; K06963 tRNA acetyltransferase TAN1	GO:0008152 metabolic process	GO:0003723 RNA binding | GO:0016831 carboxy-lyase activity | GO:0000287 magnesium ion binding | GO:0030976 thiamine pyrophosphate binding	--
CGLO_15601	9586.68	5753.68	-0.736546	Down	0.00119441	1200	EQB45514	gi|530462664|gb|EQB45514.1|	hypothetical protein CGLO_15601 [Colletotrichum gloeosporioides Cg-14]	--	--	GO:0030476 ascospore wall assembly	--	GO:0005619 ascospore wall | GO:0005783 endoplasmic reticulum
CGLO_10878	1486.48	1596.07	0.102616	Up	0.928944	2754	EQB49760	gi|530468367|gb|EQB49760.1|	hypothetical protein CGLO_10878 [Colletotrichum gloeosporioides Cg-14]	fpu:FPSE_09135	hypothetical protein; K14006 protein transport protein SEC23	GO:0006412 translation | GO:0006888 ER to Golgi vesicle-mediated transport | GO:0006886 intracellular protein transport	GO:0008270 zinc ion binding | GO:0003735 structural constituent of ribosome	GO:0005840 ribosome | GO:0030127 COPII vesicle coat
CGLO_15504	2169.3	1885.54	-0.202249	Down	0.879144	1287	EQB45599	gi|530462765|gb|EQB45599.1|	C4-dicarboxylate transporter/malic acid transporter [Colletotrichum gloeosporioides Cg-14]	--	--	GO:0055085 transmembrane transport	--	GO:0016021 integral component of membrane
CGLO_10479	0.868425	1.49237	0.781135	Up	0.534921	2325	EQB50101	gi|530468816|gb|EQB50101.1|	hypothetical protein CGLO_10479 [Colletotrichum gloeosporioides Cg-14]	vda:VDAG_07625	hypothetical protein; K15502 serine/threonine-protein phosphatase 6 regulatory ankyrin repeat subunit A	--	--	--
CGLO_02701	207.713	153.01	-0.440964	Down	0.353449	996	EQB57203	gi|530477707|gb|EQB57203.1|	vacuolar import and degradation protein [Colletotrichum gloeosporioides Cg-14]	--	--	--	--	--
CGLO_11032	0.932469	0.815184	-0.193931	Down	0.939537	924	EQB49634	gi|530468204|gb|EQB49634.1|	MIP family channel protein [Colletotrichum gloeosporioides Cg-14]	nhe:NECHADRAFT_90431	hypothetical protein; K09885 aquaporin rerated protein, other eukaryote	GO:0006810 transport	GO:0005215 transporter activity	GO:0016021 integral component of membrane
CGLO_02384	373.731	394.893	0.0794619	Up	0.960155	597	EQB57480	gi|530478049|gb|EQB57480.1|	hypothetical protein CGLO_02384 [Colletotrichum gloeosporioides Cg-14]	--	--	GO:0034765 regulation of ion transmembrane transport	GO:0005244 voltage-gated ion channel activity	GO:0016021 integral component of membrane
CGLO_04568	0.87227	0.656538	-0.409895	Down	0.775783	621	EQB55500	gi|530475432|gb|EQB55500.1|	hypothetical protein CGLO_04568 [Colletotrichum gloeosporioides Cg-14]	--	--	--	--	--
CGLO_09105	64.726	48.6316	-0.412453	Down	0.706801	483	EQB51363	gi|530470374|gb|EQB51363.1|	hypothetical protein CGLO_09105 [Colletotrichum gloeosporioides Cg-14]	--	--	GO:0006624 vacuolar protein processing	--	GO:0016021 integral component of membrane | GO:0005773 vacuole
CGLO_06380	33.0576	32.342	-0.0315741	Down	0.980455	1155	EQB53863	gi|530473423|gb|EQB53863.1|	lipase [Colletotrichum gloeosporioides Cg-14]	--	--	GO:0006629 lipid metabolic process	GO:0016787 hydrolase activity	--
CGLO_13015	144.692	118.71	-0.285554	Down	0.811449	1239	EQB47811	gi|530465847|gb|EQB47811.1|	centromere binding protein B [Colletotrichum gloeosporioides Cg-14]	--	--	--	GO:0003677 DNA binding	--
CGLO_08235	0.143864	0.14924	0.0529239	Up	0.966181	1062	EQB52158	gi|530471365|gb|EQB52158.1|	hypothetical protein CGLO_08235 [Colletotrichum gloeosporioides Cg-14]	--	--	--	--	--
CGLO_00423	55.9373	40.3738	-0.47039	Down	0.726726	1050	EQB59206	gi|530480150|gb|EQB59206.1|	hypothetical protein CGLO_00423 [Colletotrichum gloeosporioides Cg-14]	ure:UREG_00738	hypothetical protein; K12584 m7GpppX diphosphatase [EC:3.6.1.59]	--	GO:0016740 transferase activity	--
CGLO_16703	14.2055	22.5748	0.668261	Up	0.658394	1749	EQB44535	gi|530461419|gb|EQB44535.1|	hypothetical protein CGLO_16703 [Colletotrichum gloeosporioides Cg-14]	pno:SNOG_12170	hypothetical protein; K00767 nicotinate-nucleotide pyrophosphorylase (carboxylating) [EC:2.4.2.19]	GO:0006357 regulation of transcription from RNA polymerase II promoter	GO:0008270 zinc ion binding | GO:0000981 RNA polymerase II transcription factor activity, sequence-specific DNA binding | GO:0003677 DNA binding	GO:0005634 nucleus
CGLO_02781	8.9008	6.44126	-0.466593	Down	0.853363	405	EQB57144	gi|530477630|gb|EQB57144.1|	hypothetical protein CGLO_02781 [Colletotrichum gloeosporioides Cg-14]	--	--	--	--	--
CGLO_00557	365.74	290.189	-0.333822	Down	0.608544	1329	EQB59100	gi|530480020|gb|EQB59100.1|	TATA box binding protein associated factor [Colletotrichum gloeosporioides Cg-14]	fgr:FGSG_09011	hypothetical protein; K03131 transcription initiation factor TFIID subunit 6	GO:0006413 translational initiation | GO:0051123 RNA polymerase II transcriptional preinitiation complex assembly | GO:0006357 regulation of transcription from RNA polymerase II promoter | GO:0051090 regulation of sequence-specific DNA binding transcription factor activity | GO:0016573 histone acetylation	GO:0003743 translation initiation factor activity | GO:0046982 protein heterodimerization activity | GO:0042802 identical protein binding | GO:0001102 RNA polymerase II activating transcription factor binding | GO:0003682 chromatin binding | GO:0032947 protein complex scaffold	GO:0000124 SAGA complex | GO:0005829 cytosol | GO:0046695 SLIK (SAGA-like) complex | GO:0005669 transcription factor TFIID complex
CGLO_08741	2.38391	3.2933	0.466206	Up	0.853732	1590	EQB51707	gi|530470800|gb|EQB51707.1|	cytochrome P450 [Colletotrichum gloeosporioides Cg-14]	nhe:NECHADRAFT_55048	hypothetical protein; K07824 benzoate 4-monooxygenase [EC:1.14.13.12]	GO:0055114 oxidation-reduction process	GO:0020037 heme binding | GO:0016705 oxidoreductase activity, acting on paired donors, with incorporation or reduction of molecular oxygen | GO:0004497 monooxygenase activity | GO:0005506 iron ion binding	GO:0016021 integral component of membrane
CGLO_13050	37.6585	46.515	0.30472	Up	0.864636	1029	EQB47796	gi|530465823|gb|EQB47796.1|	hypothetical protein CGLO_13050 [Colletotrichum gloeosporioides Cg-14]	--	--	--	--	GO:0016021 integral component of membrane
CGLO_03758	16.05	7.07618	-1.18153	Down	0.19793	552	EQB56245	gi|530476327|gb|EQB56245.1|	hypothetical protein CGLO_03758 [Colletotrichum gloeosporioides Cg-14]	--	--	GO:0006355 regulation of transcription, DNA-templated	--	--
CGLO_02073	623.396	736.799	0.241122	Up	0.761729	2577	EQB57774	gi|530478406|gb|EQB57774.1|	coatomer WD associated region [Colletotrichum gloeosporioides Cg-14]	vda:VDAG_00773	coatomer subunit beta; K17302 coatomer subunit beta'	GO:0008152 metabolic process | GO:0016192 vesicle-mediated transport | GO:0006886 intracellular protein transport	GO:0003824 catalytic activity | GO:0005198 structural molecule activity	GO:0030117 membrane coat
CGLO_16005	85.393	48.076	-0.828802	Down	0.489045	738	EQB45164	gi|530462214|gb|EQB45164.1|	hypothetical protein CGLO_16005 [Colletotrichum gloeosporioides Cg-14]	--	--	--	--	--
CGLO_17325	0.409269	0.470042	0.199739	Up	0.902858	1617	EQB43992	gi|530460714|gb|EQB43992.1|	vitamin H transporter [Colletotrichum gloeosporioides Cg-14]	vda:VDAG_04024	pantothenate transporter liz1; K03448 MFS transporter, ACS family, pantothenate transporter	GO:0055085 transmembrane transport	--	GO:0016021 integral component of membrane
CGLO_10724	549.246	379.412	-0.533687	Down	0.328992	1773	EQB49903	gi|530468556|gb|EQB49903.1|	hypothetical protein CGLO_10724 [Colletotrichum gloeosporioides Cg-14]	cmt:CCM_09371	RING finger membrane protein; K10661 E3 ubiquitin-protein ligase MARCH6 [EC:2.3.2.27]	--	--	--
CGLO_07041	58.3261	67.1304	0.202825	Up	0.912617	825	EQB53246	gi|530472688|gb|EQB53246.1|	hypothetical protein CGLO_07041 [Colletotrichum gloeosporioides Cg-14]	maj:MAA_00951	Protein phosphatase 2A, regulatory B subunit, B56; K11584 serine/threonine-protein phosphatase 2A regulatory subunit B'	--	--	--
CGLO_03066	6974.28	4373.79	-0.67316	Down	0.143112	1254	EQB56890	gi|596706006|ref|XP_007283488.1|	phosphoglycerate kinase [Colletotrichum gloeosporioides Nara gc5] >gi|429852290|gb|ELA27433.1| phosphoglycerate kinase [Colletotrichum gloeosporioides Nara gc5] >gi|530477305|gb|EQB56890.1| phosphoglycerate kinase [Colletotrichum gloeosporioides Cg-14]	vda:VDAG_07805	phosphoglycerate kinase; K00927 phosphoglycerate kinase [EC:2.7.2.3]	GO:0006094 gluconeogenesis | GO:0006096 glycolytic process	GO:0004618 phosphoglycerate kinase activity | GO:0005524 ATP binding	GO:0005739 mitochondrion | GO:0005634 nucleus
CGLO_16897	0.149666	0.155258	0.0529239	Up	0.966181	1632	EQB44371	gi|530461203|gb|EQB44371.1|	hypothetical protein CGLO_16897 [Colletotrichum gloeosporioides Cg-14]	--	--	--	--	--
CGLO_02844	129.191	70.3694	-0.876481	Down	0.520635	1446	EQB57078	gi|530477551|gb|EQB57078.1|	aldehyde dehydrogenase [Colletotrichum gloeosporioides Cg-14]	wic:J056_001597	Aldehyde dehydrogenase; K00128 aldehyde dehydrogenase (NAD+) [EC:1.2.1.3]	GO:0055114 oxidation-reduction process	GO:0016620 oxidoreductase activity, acting on the aldehyde or oxo group of donors, NAD or NADP as acceptor	--
CGLO_11678	2.78511	2.51462	-0.147394	Down	0.966181	3651	EQB49021	gi|530467428|gb|EQB49021.1|	hypothetical protein CGLO_11678 [Colletotrichum gloeosporioides Cg-14]	kla:KLLA0F13552g	hypothetical protein; K02515 serine/threonine-protein kinase HSL1, negative regulator of Swe1 kinase [EC:2.7.11.-]	GO:0006468 protein phosphorylation	GO:0004672 protein kinase activity | GO:0005524 ATP binding	--
CGLO_08919	7131.26	3918.23	-0.863955	Down	0.00427284	507	EQB51539	gi|596670581|ref|XP_007276889.1|	glutathione peroxidase [Colletotrichum gloeosporioides Nara gc5] >gi|429859299|gb|ELA34087.1| glutathione peroxidase [Colletotrichum gloeosporioides Nara gc5]	nhe:NECHADRAFT_73875	hypothetical protein; K00432 glutathione peroxidase [EC:1.11.1.9]	GO:0070301 cellular response to hydrogen peroxide | GO:0042744 hydrogen peroxide catabolic process | GO:0019430 removal of superoxide radicals | GO:0045454 cell redox homeostasis | GO:0055114 oxidation-reduction process	GO:0004602 glutathione peroxidase activity | GO:0008379 thioredoxin peroxidase activity	GO:0005634 nucleus | GO:0005829 cytosol | GO:0005739 mitochondrion
CGLO_05789	11.0995	6.02211	-0.882151	Down	0.557618	252	EQB54376	gi|530474075|gb|EQB54376.1|	hypothetical protein CGLO_05789 [Colletotrichum gloeosporioides Cg-14]	--	--	--	--	--
CGLO_09470	678.834	2833.28	2.06134	Up	0.0146737	486	EQB51032	gi|530469979|gb|EQB51032.1|	hypothetical protein CGLO_09470 [Colletotrichum gloeosporioides Cg-14]	--	--	--	--	--
CGLO_04159	310.6	233.558	-0.41128	Down	0.591049	2409	EQB55870	gi|530475877|gb|EQB55870.1|	FAD binding domain-containing protein [Colletotrichum gloeosporioides Cg-14]	nfi:NFIA_096050	FAD binding domain protein; K18386 FAD dependent monooxygenase [EC:1.14.13.-]	GO:0055114 oxidation-reduction process	GO:0071949 FAD binding | GO:0016491 oxidoreductase activity	GO:0016021 integral component of membrane
CGLO_06516	65.2204	99.2843	0.606244	Up	0.241765	4593	EQB53725	gi|530473260|gb|EQB53725.1|	hypothetical protein CGLO_06516 [Colletotrichum gloeosporioides Cg-14]	--	--	GO:0000723 telomere maintenance	GO:0003677 DNA binding	GO:0000784 nuclear chromosome, telomeric region
CGLO_02589	715.176	679.304	-0.0742397	Down	0.94343	3237	EQB57305	gi|530477831|gb|EQB57305.1|	carbon-nitrogen hydrolase [Colletotrichum gloeosporioides Cg-14]	abp:AGABI1DRAFT115298	AGABI1DRAFT_115298; hypothetical protein; K13566 omega-amidase [EC:3.5.1.3]	GO:0006807 nitrogen compound metabolic process	GO:0016810 hydrolase activity, acting on carbon-nitrogen (but not peptide) bonds	GO:0005739 mitochondrion
CGLO_13697	34.7772	32.4801	-0.0985873	Down	0.966181	393	EQB47181	gi|530464967|gb|EQB47181.1|	ATP11 protein [Colletotrichum gloeosporioides Cg-14]	nhe:NECHADRAFT_62754	hypothetical protein; K07555 ATP synthase mitochondrial F1 complex assembly factor 1	GO:0033615 mitochondrial proton-transporting ATP synthase complex assembly	GO:0051082 unfolded protein binding	GO:0005739 mitochondrion
CGLO_17697	0.149666	0.155258	0.0529239	Up	0.966181	306	EQB43632	gi|530460265|gb|EQB43632.1|	hypothetical protein CGLO_17697 [Colletotrichum gloeosporioides Cg-14]	aor:AOR_1_60154	AO090003000032; hypothetical protein; K00108 choline dehydrogenase [EC:1.1.99.1]	GO:0055114 oxidation-reduction process	GO:0050660 flavin adenine dinucleotide binding | GO:0016614 oxidoreductase activity, acting on CH-OH group of donors	--
CGLO_17277	38.158	52.4076	0.457793	Up	0.659411	549	EQB44016	gi|530460744|gb|EQB44016.1|	hypothetical protein CGLO_17277 [Colletotrichum gloeosporioides Cg-14]	--	--	--	--	--
CGLO_00651	0.2796	0.306607	0.133025	Up	0.938616	1317	EQB59020	gi|530479920|gb|EQB59020.1|	hypothetical protein CGLO_00651 [Colletotrichum gloeosporioides Cg-14]	pno:SNOG_04691	hypothetical protein; K16261 yeast amino acid transporter	--	--	--
CGLO_03877	47.8753	22.8898	-1.06458	Down	0.10763	1101	EQB56130	gi|530476192|gb|EQB56130.1|	MIP family channel protein [Colletotrichum gloeosporioides Cg-14]	pfp:PFL1_05919	hypothetical protein; K03441 aquaglyceroporin related protein, other eukaryote	GO:0006810 transport	GO:0005215 transporter activity	GO:0016021 integral component of membrane
CGLO_06004	489.676	442.172	-0.147221	Down	0.910897	1104	EQB54192	gi|530473840|gb|EQB54192.1|	transcription factor IIA [Colletotrichum gloeosporioides Cg-14]	nhe:NECHADRAFT_75297	hypothetical protein; K03122 transcription initiation factor TFIIA large subunit	GO:0051123 RNA polymerase II transcriptional preinitiation complex assembly	--	GO:0005672 transcription factor TFIIA complex
CGLO_12896	8.74891	10.7718	0.300088	Up	0.92345	2715	EQB47923	gi|530465986|gb|EQB47923.1|	glycosyl hydrolase family 18 [Colletotrichum gloeosporioides Cg-14]	bze:COCCADRAFT_67262	glycoside hydrolase family 18 protein; K01183 chitinase [EC:3.2.1.14]	GO:0005975 carbohydrate metabolic process | GO:0006032 chitin catabolic process	GO:0004568 chitinase activity | GO:0008061 chitin binding	--
CGLO_03181	118.264	109.977	-0.10481	Down	0.939687	354	EQB56782	gi|530477173|gb|EQB56782.1|	hypothetical protein CGLO_03181 [Colletotrichum gloeosporioides Cg-14]	mgr:MGG_08844	RING-box protein 1; K03868 RING-box protein 1	GO:0042787 protein ubiquitination involved in ubiquitin-dependent protein catabolic process | GO:0000082 G1/S transition of mitotic cell cycle | GO:0031146 SCF-dependent proteasomal ubiquitin-dependent protein catabolic process	GO:0030674 protein binding, bridging | GO:0008270 zinc ion binding | GO:0016874 ligase activity	GO:0031463 Cul3-RING ubiquitin ligase complex | GO:0019005 SCF ubiquitin ligase complex | GO:0005737 cytoplasm | GO:0035361 Cul8-RING ubiquitin ligase complex | GO:0005634 nucleus
CGLO_14175	4092.31	3187.91	-0.360304	Down	0.729653	2421	EQB46755	gi|530464330|gb|EQB46755.1|	hypothetical protein CGLO_14175 [Colletotrichum gloeosporioides Cg-14]	--	--	--	--	--
CGLO_16722	1261.59	917.123	-0.46005	Down	0.155137	1185	EQB44530	gi|530461411|gb|EQB44530.1|	inosine-uridine preferring nucleoside hydrolase [Colletotrichum gloeosporioides Cg-14]	tre:TRIREDRAFT_21663	nucleoside hydrolase; K01240 uridine nucleosidase [EC:3.2.2.3]	GO:0034356 NAD biosynthesis via nicotinamide riboside salvage pathway | GO:0019358 nicotinate nucleotide salvage | GO:0006216 cytidine catabolic process | GO:0030433 ER-associated ubiquitin-dependent protein catabolic process | GO:0006218 uridine catabolic process | GO:0008655 pyrimidine-containing compound salvage	GO:0070635 nicotinamide riboside hydrolase activity | GO:0070636 nicotinic acid riboside hydrolase activity | GO:0045437 uridine nucleosidase activity	--
CGLO_12141	0.388812	0.341454	-0.18738	Down	0.902858	573	EQB48604	gi|530466886|gb|EQB48604.1|	fungal specific transcription factor [Colletotrichum gloeosporioides Cg-14]	--	--	--	--	--
CGLO_11751	0.290875	0.318971	0.133025	Up	0.938616	1719	EQB48948	gi|530467335|gb|EQB48948.1|	hypothetical protein CGLO_11751 [Colletotrichum gloeosporioides Cg-14]	--	--	GO:0098656 anion transmembrane transport	GO:0005452 inorganic anion exchanger activity	GO:0016021 integral component of membrane
CGLO_18028	228.172	222.2	-0.0382624	Down	0.973121	1200	EQB43329	gi|530459846|gb|EQB43329.1|	hypothetical protein CGLO_18028 [Colletotrichum gloeosporioides Cg-14]	--	--	--	--	--
CGLO_17260	2.50117	3.86217	0.626807	Up	0.771067	336	EQB44031	gi|530460770|gb|EQB44031.1|	prostacyclin synthase [Colletotrichum gloeosporioides Cg-14]	bsc:COCSADRAFT_343799	hypothetical protein; K07430 25/26-hydroxycholesterol 7alpha-hydroxylase [EC:1.14.14.29]	GO:0055114 oxidation-reduction process	GO:0020037 heme binding | GO:0016705 oxidoreductase activity, acting on paired donors, with incorporation or reduction of molecular oxygen | GO:0004497 monooxygenase activity | GO:0005506 iron ion binding	--
CGLO_16515	96.6774	111.07	0.200219	Up	0.86587	723	EQB44702	gi|530461634|gb|EQB44702.1|	CAP-Gly domain-containing protein [Colletotrichum gloeosporioides Cg-14]	maw:MAC_06560	tubulin specific chaperone cofactor B; K17262 tubulin-folding cofactor B	GO:0007023 post-chaperonin tubulin folding pathway	GO:0043014 alpha-tubulin binding | GO:0008017 microtubule binding	GO:0005634 nucleus
CGLO_16693	401.058	440.32	0.134741	Up	0.902858	1893	EQB44555	gi|530461443|gb|EQB44555.1|	hypothetical protein CGLO_16693 [Colletotrichum gloeosporioides Cg-14]	pfp:PFL1_02862	hypothetical protein; K12481 rabenosyn-5	GO:0016567 protein ubiquitination	GO:0004842 ubiquitin-protein transferase activity | GO:0008270 zinc ion binding | GO:0032266 phosphatidylinositol-3-phosphate binding	GO:0000329 fungal-type vacuole membrane | GO:0005770 late endosome
CGLO_17173	976.804	210.564	-2.21381	Down	1.06e-16	1632	EQB44112	gi|530460877|gb|EQB44112.1|	major facilitator superfamily transporter [Colletotrichum gloeosporioides Cg-14]	npa:UCRNP2_7395	putative peptidyl-prolyl cis-trans isomerase protein; K05864 peptidyl-prolyl isomerase D [EC:5.2.1.8]	GO:0055085 transmembrane transport	--	GO:0016021 integral component of membrane
CGLO_05029	85.1776	56.6367	-0.588736	Down	0.623323	684	EQB55074	gi|530474919|gb|EQB55074.1|	extracellular serine-rich protein [Colletotrichum gloeosporioides Cg-14]	tve:TRV_03003	hypothetical protein; K04487 cysteine desulfurase [EC:2.8.1.7]	--	--	--
CGLO_05878	404.641	327.098	-0.306921	Down	0.767343	1041	EQB54304	gi|530473986|gb|EQB54304.1|	hypothetical protein CGLO_05878 [Colletotrichum gloeosporioides Cg-14]	tre:TRIREDRAFT_107323	hypothetical protein; K04708 3-dehydrosphinganine reductase [EC:1.1.1.102]	GO:0030148 sphingolipid biosynthetic process | GO:0006666 3-keto-sphinganine metabolic process | GO:0055114 oxidation-reduction process	GO:0047560 3-dehydrosphinganine reductase activity	GO:0005811 lipid particle | GO:0016021 integral component of membrane
CGLO_00385	2.51359	2.44049	-0.0425774	Down	0.980916	633	EQB59260	gi|530480212|gb|EQB59260.1|	hypothetical protein CGLO_00385 [Colletotrichum gloeosporioides Cg-14]	--	--	--	--	--
CGLO_02232	0.332218	0.326019	-0.0271774	Down	0.979526	1269	EQB57605	gi|530478206|gb|EQB57605.1|	hypothetical protein CGLO_02232 [Colletotrichum gloeosporioides Cg-14]	--	--	--	--	GO:0016021 integral component of membrane
CGLO_10077	940.012	815.389	-0.20519	Down	0.816108	2424	EQB50485	gi|530469302|gb|EQB50485.1|	hypothetical protein CGLO_10077 [Colletotrichum gloeosporioides Cg-14]	--	--	--	--	GO:0016021 integral component of membrane
CGLO_06087	114.306	105.444	-0.116434	Down	0.944045	1728	EQB54115	gi|530473745|gb|EQB54115.1|	F-box domain-containing protein [Colletotrichum gloeosporioides Cg-14]	--	--	--	--	--
CGLO_16790	21.4657	31.9097	0.571962	Up	0.777873	528	EQB44470	gi|596705321|ref|XP_007283358.1|	tRNA methyltransferase subunit [Colletotrichum gloeosporioides Nara gc5] >gi|429852444|gb|ELA27580.1| tRNA methyltransferase subunit [Colletotrichum gloeosporioides Nara gc5]	maj:MAA_06213	tRNA methyltransferase complex GCD14 subunit; K07442 tRNA (adenine57-N1/adenine58-N1)-methyltransferase catalytic subunit [EC:2.1.1.219 2.1.1.220]	GO:0030488 tRNA methylation	GO:0016429 tRNA (adenine-N1-)-methyltransferase activity	GO:0031515 tRNA (m1A) methyltransferase complex | GO:0005634 nucleus | GO:0005829 cytosol
CGLO_12247	94.8586	131.711	0.473526	Up	0.464912	663	EQB48509	gi|530466768|gb|EQB48509.1|	ribosomal protein L17 [Colletotrichum gloeosporioides Cg-14]	spo:SPBC1271.13	mrpl8; mitochondrial ribosomal protein subunit L8 (predicted); K02879 large subunit ribosomal protein L17	GO:0000002 mitochondrial genome maintenance | GO:0032543 mitochondrial translation	GO:0003735 structural constituent of ribosome	GO:0005762 mitochondrial large ribosomal subunit
CGLO_09474	1.9025	2.83661	0.576277	Up	0.787709	1824	EQB51036	gi|530469983|gb|EQB51036.1|	hypothetical protein CGLO_09474 [Colletotrichum gloeosporioides Cg-14]	--	--	--	--	--
CGLO_00107	29.489	46.2569	0.649492	Up	0.554337	2406	EQB59502	gi|530480528|gb|EQB59502.1|	hypothetical protein CGLO_00107 [Colletotrichum gloeosporioides Cg-14]	--	--	--	--	--
CGLO_04967	9.22795	24.5997	1.41456	Up	0.0858206	795	EQB55126	gi|530474981|gb|EQB55126.1|	hypothetical protein CGLO_04967 [Colletotrichum gloeosporioides Cg-14]	--	--	--	--	--
CGLO_05523	0.424937	0.489833	0.205041	Up	0.902858	1929	EQB54605	gi|530474364|gb|EQB54605.1|	hypothetical protein CGLO_05523 [Colletotrichum gloeosporioides Cg-14]	ang:ANI_1_1998094	An11g05010; serine/threonine-protein kinase ark1; K08850 aurora kinase, other [EC:2.7.11.1]	GO:0006468 protein phosphorylation	GO:0004672 protein kinase activity | GO:0005524 ATP binding	--
CGLO_10647	115.648	95.6445	-0.273984	Down	0.789768	2127	EQB49964	gi|530468633|gb|EQB49964.1|	hypothetical protein CGLO_10647 [Colletotrichum gloeosporioides Cg-14]	nhe:NECHADRAFT_100263	hypothetical protein; K03362 F-box and WD-40 domain protein 1/11	--	--	--
CGLO_12785	39.9177	39.8764	-0.00149129	Down	0.998714	1050	EQB48021	gi|530466120|gb|EQB48021.1|	hypothetical protein CGLO_12785 [Colletotrichum gloeosporioides Cg-14]	tmn:UCRPA7_212	putative replication factor c subunit 5 protein; K10756 replication factor C subunit 3/5	GO:0070914 UV-damage excision repair | GO:0006272 leading strand elongation | GO:0007062 sister chromatid cohesion	GO:0003677 DNA binding	GO:0005829 cytosol | GO:0031391 Elg1 RFC-like complex | GO:0000790 nuclear chromatin | GO:0031389 Rad17 RFC-like complex | GO:0031390 Ctf18 RFC-like complex | GO:0043596 nuclear replication fork | GO:0005663 DNA replication factor C complex
CGLO_01637	972.3	358.057	-1.44121	Down	0.0626549	2175	EQB58150	gi|530478858|gb|EQB58150.1|	Lecithin:cholesterol acyltransferase [Colletotrichum gloeosporioides Cg-14]	val:VDBG_09717	Phospholipid:diacylglycerol acyltransferase; K00679 phospholipid:diacylglycerol acyltransferase [EC:2.3.1.158]	GO:0019915 lipid storage | GO:0019432 triglyceride biosynthetic process | GO:0006672 ceramide metabolic process	GO:0046027 phospholipid:diacylglycerol acyltransferase activity | GO:0008374 O-acyltransferase activity	GO:0097038 perinuclear endoplasmic reticulum | GO:0016021 integral component of membrane | GO:0005811 lipid particle
CGLO_13378	0.348158	0.34166	-0.0271774	Down	0.979526	1029	EQB47473	gi|530465380|gb|EQB47473.1|	hypothetical protein CGLO_13378 [Colletotrichum gloeosporioides Cg-14]	--	--	--	--	--
CGLO_00276	28.3299	36.0032	0.345797	Up	0.816497	693	EQB59357	gi|530480337|gb|EQB59357.1|	acetyltransferase [Colletotrichum gloeosporioides Cg-14]	npa:UCRNP2_5654	putative phenylacetate 2-hydroxylase protein; K10437 phenylacetate 2-hydroxylase [EC:1.14.13.-]	GO:0008152 metabolic process	GO:0008080 N-acetyltransferase activity	--
CGLO_02331	1.28405	1.01723	-0.336051	Down	0.853363	828	EQB57542	gi|530478121|gb|EQB57542.1|	hypothetical protein CGLO_02331 [Colletotrichum gloeosporioides Cg-14]	--	--	--	--	--
CGLO_14770	1.65792	1.45439	-0.188963	Down	0.94343	1386	EQB46200	gi|530463556|gb|EQB46200.1|	hypothetical protein CGLO_14770 [Colletotrichum gloeosporioides Cg-14]	nhe:NECHADRAFT_68940	hypothetical protein; K01824 cholestenol Delta-isomerase [EC:5.3.3.5]	GO:0006357 regulation of transcription from RNA polymerase II promoter	GO:0000981 RNA polymerase II transcription factor activity, sequence-specific DNA binding | GO:0008270 zinc ion binding	GO:0005634 nucleus
CGLO_08179	0.857714	0.779189	-0.138523	Down	0.946602	1794	EQB52209	gi|530471425|gb|EQB52209.1|	hypothetical protein CGLO_08179 [Colletotrichum gloeosporioides Cg-14]	tmn:UCRPA7_3591	putative tannase subunit protein; K10759 tannase [EC:3.1.1.20]	GO:0008152 metabolic process	GO:0016787 hydrolase activity	--
CGLO_11017	0.425164	0.373378	-0.18738	Down	0.902858	822	EQB49619	gi|530468189|gb|EQB49619.1|	hypothetical protein CGLO_11017 [Colletotrichum gloeosporioides Cg-14]	--	--	--	--	--
CGLO_05933	97.3906	114.347	0.231562	Up	0.861118	4359	EQB54263	gi|530473935|gb|EQB54263.1|	ABC-2 type transporter [Colletotrichum gloeosporioides Cg-14]	cne:CNB05770	xenobiotic-transporting ATPase; K08711 ATP-binding cassette, subfamily G (WHITE), member 2, PDR	GO:0055085 transmembrane transport | GO:0008152 metabolic process	GO:0042626 ATPase activity, coupled to transmembrane movement of substances | GO:0005524 ATP binding	GO:0016021 integral component of membrane
CGLO_12526	238.68	217.404	-0.134697	Down	0.902858	888	EQB48258	gi|530466446|gb|EQB48258.1|	hypothetical protein CGLO_12526 [Colletotrichum gloeosporioides Cg-14]	--	--	GO:0008152 metabolic process	GO:0003824 catalytic activity	--
CGLO_02601	4.66167	12.3474	1.40528	Up	0.133274	1710	EQB57292	gi|530477814|gb|EQB57292.1|	multicopper oxidase [Colletotrichum gloeosporioides Cg-14]	val:VDBG_00579	iron transport multicopper oxidase FET3; K19791 iron transport multicopper oxidase	GO:0097460 ferrous iron import into cell | GO:0055114 oxidation-reduction process	GO:0016491 oxidoreductase activity | GO:0005507 copper ion binding	GO:0005783 endoplasmic reticulum
CGLO_17388	0.277161	0.303932	0.133025	Up	0.938616	1284	EQB43909	gi|530460616|gb|EQB43909.1|	transmembrane amino acid transporter [Colletotrichum gloeosporioides Cg-14]	wic:J056_003735	3-methyl-2-oxobutanoate hydroxymethyltransferase; K00606 3-methyl-2-oxobutanoate hydroxymethyltransferase [EC:2.1.2.11]	--	--	GO:0016021 integral component of membrane
CGLO_07625	0.980958	1.4688	0.582378	Up	0.748538	1872	EQB52730	gi|530472051|gb|EQB52730.1|	hypothetical protein CGLO_07625 [Colletotrichum gloeosporioides Cg-14]	--	--	--	--	--
CGLO_15827	17.3035	49.3357	1.51157	Up	0.00368902	2265	EQB45312	gi|530462406|gb|EQB45312.1|	hypothetical protein CGLO_15827 [Colletotrichum gloeosporioides Cg-14]	--	--	--	--	--
CGLO_07655	10.2799	14.5489	0.501085	Up	0.779263	1893	EQB52698	gi|530472011|gb|EQB52698.1|	DNA photolyase [Colletotrichum gloeosporioides Cg-14]	nhe:NECHADRAFT_38167	hypothetical protein; K02295 cryptochrome	GO:0008152 metabolic process	GO:0016829 lyase activity	--
CGLO_08461	3.26864	3.97075	0.28072	Up	0.93431	504	EQB51953	gi|530471104|gb|EQB51953.1|	hypothetical protein CGLO_08461 [Colletotrichum gloeosporioides Cg-14]	nhe:NECHADRAFT_52465	hypothetical protein; K09252 feruloyl esterase [EC:3.1.1.73]	--	--	GO:0016021 integral component of membrane
CGLO_02646	1.67604	1.60109	-0.0659989	Down	0.971489	465	EQB57250	gi|530477762|gb|EQB57250.1|	hypothetical protein CGLO_02646 [Colletotrichum gloeosporioides Cg-14]	--	--	--	--	--
CGLO_15479	0.2796	0.306607	0.133025	Up	0.938616	609	EQB45622	gi|530462798|gb|EQB45622.1|	hypothetical protein CGLO_15479 [Colletotrichum gloeosporioides Cg-14]	--	--	GO:0008152 metabolic process	GO:0003824 catalytic activity	--
CGLO_00901	13.8688	10.4421	-0.409426	Down	0.854243	1755	EQB58824	gi|530479677|gb|EQB58824.1|	POT family protein [Colletotrichum gloeosporioides Cg-14]	vda:VDAG_01143	peptide transporter PTR2; K03305 proton-dependent oligopeptide transporter, POT family	GO:0006857 oligopeptide transport	GO:0005215 transporter activity	GO:0016021 integral component of membrane
CGLO_13047	466.784	470.083	0.0101605	Up	0.98633	1926	EQB47793	gi|530465820|gb|EQB47793.1|	VHS domain-containing protein [Colletotrichum gloeosporioides Cg-14]	cthr:CTHT_0044300	hypothetical protein; K12182 hepatocyte growth factor-regulated tyrosine kinase substrate	GO:0016192 vesicle-mediated transport | GO:0006886 intracellular protein transport	--	GO:0030131 clathrin adaptor complex
CGLO_11097	2.06549	1.93818	-0.0917852	Down	0.966181	1116	EQB49547	gi|530468104|gb|EQB49547.1|	hypothetical protein CGLO_11097 [Colletotrichum gloeosporioides Cg-14]	ago:AGOS_ACL096W	ACL096Wp; K09248 proline utilization trans-activator	GO:0006351 transcription, DNA-templated	GO:0003677 DNA binding | GO:0008270 zinc ion binding	GO:0005634 nucleus
CGLO_03509	34.9691	45.7856	0.388814	Up	0.74263	1644	EQB56475	gi|530476602|gb|EQB56475.1|	hypothetical protein CGLO_03509 [Colletotrichum gloeosporioides Cg-14]	bsc:COCSADRAFT_22570	hypothetical protein; K10589 ubiquitin-protein ligase E3 C [EC:2.3.2.26]	GO:0006357 regulation of transcription from RNA polymerase II promoter	GO:0000981 RNA polymerase II transcription factor activity, sequence-specific DNA binding | GO:0008270 zinc ion binding	GO:0005634 nucleus
CGLO_16878	4.36985	3.29339	-0.40801	Down	0.888898	375	EQB44381	gi|530461217|gb|EQB44381.1|	hypothetical protein CGLO_16878 [Colletotrichum gloeosporioides Cg-14]	--	--	--	--	--
CGLO_10668	0.207055	0.192217	-0.107279	Down	0.94343	6873	EQB49959	gi|530468626|gb|EQB49959.1|	hypothetical protein CGLO_10668 [Colletotrichum gloeosporioides Cg-14]	nfi:NFIA_074300	nonribosomal peptide synthase, putative; K18281 brevianamide F synthase	GO:0008152 metabolic process	GO:0003824 catalytic activity	--
CGLO_00823	109.181	108.333	-0.0112541	Down	0.98744	2523	EQB58867	gi|530479731|gb|EQB58867.1|	aminodeoxychorismate synthase [Colletotrichum gloeosporioides Cg-14]	mtm:MYCTH_2301272	hypothetical protein; K13950 para-aminobenzoate synthetase [EC:2.6.1.85]	GO:0008153 para-aminobenzoic acid biosynthetic process	GO:0046820 4-amino-4-deoxychorismate synthase activity | GO:0016833 oxo-acid-lyase activity	GO:0005634 nucleus | GO:0005829 cytosol
CGLO_11276	53.5904	52.3733	-0.0331428	Down	0.979526	642	EQB49394	gi|530467901|gb|EQB49394.1|	hypothetical protein CGLO_11276 [Colletotrichum gloeosporioides Cg-14]	--	--	--	--	--
CGLO_04365	113.646	171.791	0.596114	Up	0.374629	1602	EQB55690	gi|530475658|gb|EQB55690.1|	hypothetical protein CGLO_04365 [Colletotrichum gloeosporioides Cg-14]	vda:VDAG_03243	periodic tryptophan protein; K14791 periodic tryptophan protein 1	GO:0006364 rRNA processing	--	GO:0005730 nucleolus
CGLO_13125	10.9714	12	0.129283	Up	0.962615	813	EQB47703	gi|530465703|gb|EQB47703.1|	hypothetical protein CGLO_13125 [Colletotrichum gloeosporioides Cg-14]	--	--	--	--	--
CGLO_13653	54.2474	41.9564	-0.370663	Down	0.753182	1992	EQB47230	gi|530465036|gb|EQB47230.1|	hypothetical protein CGLO_13653 [Colletotrichum gloeosporioides Cg-14]	mgr:MGG_11676	choline dehydrogenase; K00108 choline dehydrogenase [EC:1.1.99.1]	GO:0055114 oxidation-reduction process	GO:0050660 flavin adenine dinucleotide binding | GO:0016614 oxidoreductase activity, acting on CH-OH group of donors	--
CGLO_02431	129.959	117.863	-0.140941	Down	0.914501	1251	EQB57440	gi|530477998|gb|EQB57440.1|	SPRY domain-containing protein [Colletotrichum gloeosporioides Cg-14]	val:VDBG_07230	D-lactate dehydrogenase; K00102 D-lactate dehydrogenase (cytochrome) [EC:1.1.2.4]	--	--	--
CGLO_11234	8.63952	17.7233	1.03662	Up	0.327109	798	EQB49442	gi|596667442|ref|XP_007276297.1|	bromodomain associated protein [Colletotrichum gloeosporioides Nara gc5] >gi|429859935|gb|ELA34691.1| bromodomain associated protein [Colletotrichum gloeosporioides Nara gc5]	fgr:FGSG_01096	hypothetical protein; K14650 transcription initiation factor TFIID subunit 3	--	--	--
CGLO_16608	127.564	133.054	0.0607943	Up	0.966181	864	EQB44626	gi|530461540|gb|EQB44626.1|	FYVE zinc finger [Colletotrichum gloeosporioides Cg-14]	tre:TRIREDRAFT_21288	hypothetical protein; K12481 rabenosyn-5	--	GO:0046872 metal ion binding	GO:0000324 fungal-type vacuole
CGLO_03569	55.4596	36.8914	-0.588153	Down	0.473874	1170	EQB56434	gi|530476554|gb|EQB56434.1|	hypothetical protein CGLO_03569 [Colletotrichum gloeosporioides Cg-14]	wic:J056_001098	Carbamoyl-phosphate synthase arginine-specific small chain; K01956 carbamoyl-phosphate synthase small subunit [EC:6.3.5.5]	GO:0008152 metabolic process	GO:0016787 hydrolase activity	GO:0016021 integral component of membrane
CGLO_09623	77.4978	81.1476	0.0663928	Up	0.966181	468	EQB50884	gi|530469802|gb|EQB50884.1|	hypothetical protein CGLO_09623 [Colletotrichum gloeosporioides Cg-14]	--	--	GO:0006614 SRP-dependent cotranslational protein targeting to membrane	GO:0008312 7S RNA binding	GO:0048500 signal recognition particle
CGLO_00124	132.002	172.517	0.386176	Up	0.639547	1605	EQB59480	gi|530480500|gb|EQB59480.1|	hypothetical protein CGLO_00124 [Colletotrichum gloeosporioides Cg-14]	--	--	--	--	--
CGLO_15098	7.53952	4.59758	-0.713597	Down	0.704829	1152	EQB45949	gi|530463217|gb|EQB45949.1|	extracellular serine-rich protein [Colletotrichum gloeosporioides Cg-14]	tve:TRV_03003	hypothetical protein; K04487 cysteine desulfurase [EC:2.8.1.7]	--	--	GO:0016021 integral component of membrane
CGLO_03430	1528.26	1393.34	-0.133345	Down	0.902858	2121	EQB56556	gi|530476697|gb|EQB56556.1|	hypothetical protein CGLO_03430 [Colletotrichum gloeosporioides Cg-14]	--	--	--	--	--
CGLO_01530	204.606	241.242	0.237632	Up	0.787475	1095	EQB58258	gi|530478989|gb|EQB58258.1|	ATP10 protein [Colletotrichum gloeosporioides Cg-14]	maj:MAA_04070	ATPase assembly factor ATP10, mitochondria; K18192 mitochondrial ATPase complex subunit ATP10	GO:0033615 mitochondrial proton-transporting ATP synthase complex assembly	GO:0051082 unfolded protein binding	GO:0005743 mitochondrial inner membrane | GO:0032592 integral component of mitochondrial membrane
CGLO_01358	7.36719	7.57616	0.0403521	Up	0.981919	396	EQB58401	gi|530479153|gb|EQB58401.1|	hypothetical protein CGLO_01358 [Colletotrichum gloeosporioides Cg-14]	--	--	--	--	--
CGLO_09302	167.466	196.116	0.22784	Up	0.839232	1236	EQB51179	gi|530470161|gb|EQB51179.1|	hypothetical protein CGLO_09302 [Colletotrichum gloeosporioides Cg-14]	--	--	GO:0008152 metabolic process	GO:0016740 transferase activity	GO:0005739 mitochondrion
CGLO_12989	1685.19	1690.33	0.00439574	Up	0.9923	513	EQB47835	gi|596716478|ref|XP_007285406.1|	scf complex subunit skp1 [Colletotrichum gloeosporioides Nara gc5] >gi|429850251|gb|ELA25543.1| scf complex subunit skp1 [Colletotrichum gloeosporioides Nara gc5]	cmt:CCM_02669	SCF complex subunit Skp1; K03094 S-phase kinase-associated protein 1	GO:0042787 protein ubiquitination involved in ubiquitin-dependent protein catabolic process | GO:0000921 septin ring assembly | GO:0007035 vacuolar acidification | GO:0007096 regulation of exit from mitosis | GO:0045116 protein neddylation | GO:0051382 kinetochore assembly | GO:0000082 G1/S transition of mitotic cell cycle | GO:0031146 SCF-dependent proteasomal ubiquitin-dependent protein catabol…	GO:0003688 DNA replication origin binding	GO:0031518 CBF3 complex | GO:0019005 SCF ubiquitin ligase complex | GO:0043291 RAVE complex | GO:0005634 nucleus
CGLO_10624	49.6344	67.6867	0.447531	Up	0.645055	972	EQB49985	gi|530468663|gb|EQB49985.1|	hypothetical protein CGLO_10624 [Colletotrichum gloeosporioides Cg-14]	--	--	--	--	--
CGLO_16291	311.199	333.448	0.0996247	Up	0.936249	981	EQB44905	gi|596699677|ref|XP_007282318.1|	serine threonine-protein phosphatase pp1 [Colletotrichum gloeosporioides Nara gc5] >gi|429853573|gb|ELA28641.1| serine threonine-protein phosphatase pp1 [Colletotrichum gloeosporioides Nara gc5] >gi|530461894|gb|EQB44905.1| calcineurin-like phosphoesterase [Colletotrichum gloeosporioides Cg-14]	maj:MAA_05993	calcineurin-like phosphoesterase; K06269 serine/threonine-protein phosphatase PP1 catalytic subunit [EC:3.1.3.16]	GO:0007094 mitotic spindle assembly checkpoint | GO:0070940 dephosphorylation of RNA polymerase II C-terminal domain | GO:0035307 positive regulation of protein dephosphorylation | GO:0006364 rRNA processing | GO:0005977 glycogen metabolic process | GO:0016576 histone dephosphorylation | GO:0061587 transfer RNA gene-mediated silencing | GO:0034501 protein localization to kinetochore | GO:0007126 …	GO:0046872 metal ion binding | GO:0004722 protein serine/threonine phosphatase activity	GO:0005816 spindle pole body | GO:0001400 mating projection base | GO:0000164 protein phosphatase type 1 complex | GO:0005935 cellular bud neck | GO:0005847 mRNA cleavage and polyadenylation specificity factor complex | GO:0000778 condensed nuclear chromosome kinetochore | GO:0005730 nucleolus
CGLO_08613	148.033	119.509	-0.3088	Down	0.796346	1266	EQB51807	gi|530470919|gb|EQB51807.1|	formyl transferase [Colletotrichum gloeosporioides Cg-14]	vda:VDAG_00046	methionyl-tRNA transformylase; K00604 methionyl-tRNA formyltransferase [EC:2.1.2.9]	GO:0006413 translational initiation | GO:0006431 methionyl-tRNA aminoacylation	GO:0016742 hydroxymethyl-, formyl- and related transferase activity	GO:0005739 mitochondrion
CGLO_17943	13.1953	24.8463	0.913012	Up	0.316519	1788	EQB43405	gi|530459964|gb|EQB43405.1|	hypothetical protein CGLO_17943 [Colletotrichum gloeosporioides Cg-14]	bze:COCCADRAFT_34908	hypothetical protein; K09246 arginine metabolism regulation protein II	--	--	--
CGLO_02054	1531.65	1474.57	-0.054797	Down	0.945104	3498	EQB57781	gi|530478414|gb|EQB57781.1|	cell wall biogenesis protein Mhp1 [Colletotrichum gloeosporioides Cg-14]	--	--	--	--	--
CGLO_02097	140.538	101.241	-0.473158	Down	0.513598	1815	EQB57737	gi|530478364|gb|EQB57737.1|	hypothetical protein CGLO_02097 [Colletotrichum gloeosporioides Cg-14]	mpr:MPER_12409	hypothetical protein ; K00108 choline dehydrogenase [EC:1.1.99.1]	GO:0055114 oxidation-reduction process	GO:0050660 flavin adenine dinucleotide binding | GO:0016614 oxidoreductase activity, acting on CH-OH group of donors	--
CGLO_01495	1.05184	1.68847	0.682794	Up	0.682562	2817	EQB58281	gi|530479018|gb|EQB58281.1|	hypothetical protein CGLO_01495 [Colletotrichum gloeosporioides Cg-14]	ssl:SS1G_14205	hypothetical protein; K01649 2-isopropylmalate synthase [EC:2.3.3.13]	GO:0019752 carboxylic acid metabolic process	GO:0046912 transferase activity, transferring acyl groups, acyl groups converted into alkyl on transfer	--
CGLO_16124	53.8146	67.6318	0.329704	Up	0.754725	2283	EQB45078	gi|530462106|gb|EQB45078.1|	hypothetical protein CGLO_16124 [Colletotrichum gloeosporioides Cg-14]	bor:COCMIDRAFT_90565	hypothetical protein; K09241 transcriptional regulatory protein GAL4	GO:0006357 regulation of transcription from RNA polymerase II promoter	GO:0008270 zinc ion binding | GO:0000981 RNA polymerase II transcription factor activity, sequence-specific DNA binding | GO:0003677 DNA binding	GO:0005634 nucleus
CGLO_04347	237.32	211.73	-0.164607	Down	0.874276	3348	EQB55704	gi|530475675|gb|EQB55704.1|	hypothetical protein CGLO_04347 [Colletotrichum gloeosporioides Cg-14]	vda:VDAG_06626	hypothetical protein; K11365 SAGA-associated factor 73	GO:0006810 transport	--	GO:0016021 integral component of membrane
CGLO_03001	4928.02	3790.93	-0.378455	Down	0.769011	729	EQB56950	gi|530477379|gb|EQB56950.1|	pH-response regulator [Colletotrichum gloeosporioides Cg-14]	--	--	--	--	GO:0016021 integral component of membrane | GO:0005886 plasma membrane
CGLO_06515	367.773	326.673	-0.170969	Down	0.864636	1416	EQB53724	gi|530473259|gb|EQB53724.1|	thiol-specific monooxygenase [Colletotrichum gloeosporioides Cg-14]	nhe:NECHADRAFT_81109	hypothetical protein; K00485 dimethylaniline monooxygenase (N-oxide forming) [EC:1.14.13.8]	GO:0055114 oxidation-reduction process	GO:0050660 flavin adenine dinucleotide binding | GO:0004499 N,N-dimethylaniline monooxygenase activity | GO:0050661 NADP binding	--
CGLO_13821	113.593	261.318	1.20193	Up	0.0654965	612	EQB47078	gi|530464818|gb|EQB47078.1|	hypothetical protein CGLO_13821 [Colletotrichum gloeosporioides Cg-14]	--	--	--	--	GO:0016021 integral component of membrane
CGLO_05261	0.182066	0.169018	-0.107279	Down	0.94343	291	EQB54852	gi|530474660|gb|EQB54852.1|	hypothetical protein CGLO_05261 [Colletotrichum gloeosporioides Cg-14]	--	--	--	--	--
CGLO_08558	260.285	290.527	0.158579	Up	0.894026	1398	EQB51861	gi|530470987|gb|EQB51861.1|	hypothetical protein CGLO_08558 [Colletotrichum gloeosporioides Cg-14]	fpu:FPSE_04817	hypothetical protein; K17908 autophagy-related protein 18	--	--	--
CGLO_08814	163.114	185.542	0.185867	Up	0.86139	2946	EQB51625	gi|530470700|gb|EQB51625.1|	elongation factor Tu GTP binding domain-containing protein [Colletotrichum gloeosporioides Cg-14]	vda:VDAG_00969	U5 small nuclear ribonucleoprotein component; K12852 116 kDa U5 small nuclear ribonucleoprotein component	GO:0000349 generation of catalytic spliceosome for first transesterification step | GO:0006414 translational elongation | GO:0000244 spliceosomal tri-snRNP complex assembly | GO:0000388 spliceosome conformational change to release U4 (or U4atac) and U1 (or U11)	GO:0003746 translation elongation factor activity | GO:0030623 U5 snRNA binding | GO:0003924 GTPase activity | GO:0005525 GTP binding	GO:0019013 viral nucleocapsid | GO:0005682 U5 snRNP | GO:0046540 U4/U6 x U5 tri-snRNP complex
CGLO_16493	2.44168	2.71077	0.150827	Up	0.962382	306	EQB44730	gi|530461666|gb|EQB44730.1|	hypothetical protein CGLO_16493 [Colletotrichum gloeosporioides Cg-14]	--	--	--	--	--
CGLO_06472	185.839	211.68	0.187837	Up	0.853363	651	EQB53776	gi|530473317|gb|EQB53776.1|	hypothetical protein CGLO_06472 [Colletotrichum gloeosporioides Cg-14]	ttt:THITE_2113495	hypothetical protein; K17435 large subunit ribosomal protein L54	--	--	GO:0005840 ribosome
CGLO_09112	0.143864	0.14924	0.0529239	Up	0.966181	582	EQB51343	gi|530470351|gb|EQB51343.1|	hypothetical protein CGLO_09112 [Colletotrichum gloeosporioides Cg-14]	--	--	--	--	GO:0016021 integral component of membrane
CGLO_12279	0.143864	0.14924	0.0529239	Up	0.966181	357	EQB48491	gi|530466739|gb|EQB48491.1|	hypothetical protein CGLO_12279 [Colletotrichum gloeosporioides Cg-14]	--	--	--	--	--
CGLO_13622	13.3283	12.1335	-0.135489	Down	0.966181	1329	EQB47255	gi|530465073|gb|EQB47255.1|	hypothetical protein CGLO_13622 [Colletotrichum gloeosporioides Cg-14]	--	--	--	GO:0003676 nucleic acid binding | GO:0046872 metal ion binding	--
CGLO_02295	189.29	178.04	-0.0884028	Down	0.94343	2619	EQB57565	gi|530478151|gb|EQB57565.1|	hypothetical protein CGLO_02295 [Colletotrichum gloeosporioides Cg-14]	--	--	--	--	--
CGLO_16300	0.207055	0.192217	-0.107279	Down	0.94343	522	EQB44901	gi|530461889|gb|EQB44901.1|	hypothetical protein CGLO_16300 [Colletotrichum gloeosporioides Cg-14]	--	--	--	--	--
CGLO_16070	0.373852	0.328316	-0.18738	Down	0.902858	1665	EQB45115	gi|530462153|gb|EQB45115.1|	cytochrome P450 [Colletotrichum gloeosporioides Cg-14]	cthr:CTHT_0020850	putative extracellular protein; K06113 arabinan endo-1,5-alpha-L-arabinosidase [EC:3.2.1.99]	GO:0055114 oxidation-reduction process	GO:0020037 heme binding | GO:0016705 oxidoreductase activity, acting on paired donors, with incorporation or reduction of molecular oxygen | GO:0004497 monooxygenase activity | GO:0005506 iron ion binding	GO:0016021 integral component of membrane
CGLO_16715	2599.58	2331.41	-0.157078	Down	0.902858	999	EQB44547	gi|530461431|gb|EQB44547.1|	HMG box protein [Colletotrichum gloeosporioides Cg-14]	ani:AN0431.2	hypothetical protein; K01427 urease [EC:3.5.1.5]	--	--	--
CGLO_02475	8.03368	8.24316	0.0371368	Up	0.982777	1635	EQB57400	gi|530477953|gb|EQB57400.1|	hypothetical protein CGLO_02475 [Colletotrichum gloeosporioides Cg-14]	--	--	--	--	--
CGLO_13963	0.87227	0.656538	-0.409895	Down	0.775783	474	EQB46955	gi|530464621|gb|EQB46955.1|	hypothetical protein CGLO_13963 [Colletotrichum gloeosporioides Cg-14]	--	--	--	--	--
CGLO_10566	8.22435	14.3389	0.801961	Up	0.614642	840	EQB50038	gi|530468733|gb|EQB50038.1|	short chain dehydrogenase [Colletotrichum gloeosporioides Cg-14]	ela:UCREL1_7416	putative l-xylulose reductase protein; K17742 sorbose reductase [EC:1.1.1.289]	GO:0055114 oxidation-reduction process	GO:0016491 oxidoreductase activity	--
CGLO_05121	0.550884	0.492575	-0.161405	Down	0.938616	1101	EQB54991	gi|530474818|gb|EQB54991.1|	hypothetical protein CGLO_05121 [Colletotrichum gloeosporioides Cg-14]	cput:CONPUDRAFT_163340	SRA-YDG; K10638 E3 ubiquitin-protein ligase UHRF1 [EC:2.3.2.27]	--	GO:0042393 histone binding	--
CGLO_04956	2678.6	1431.05	-0.904403	Down	0.0554316	906	EQB55140	gi|530474996|gb|EQB55140.1|	metallo-beta-lactamase superfamily protein [Colletotrichum gloeosporioides Cg-14]	cmt:CCM_05589	Las1-like protein; K01069 hydroxyacylglutathione hydrolase [EC:3.1.2.6]	--	--	--
CGLO_12359	297.903	295.243	-0.0129404	Down	0.985319	942	EQB48410	gi|530466633|gb|EQB48410.1|	hypothetical protein CGLO_12359 [Colletotrichum gloeosporioides Cg-14]	--	--	--	--	--
CGLO_02855	579.28	526.021	-0.139142	Down	0.902858	1866	EQB57064	gi|530477535|gb|EQB57064.1|	hypothetical protein CGLO_02855 [Colletotrichum gloeosporioides Cg-14]	val:VDBG_00665	mitochondrial precursor proteins import receptor; K17768 mitochondrial import receptor subunit TOM70	GO:0006886 intracellular protein transport | GO:0071806 protein transmembrane transport	GO:0015450 P-P-bond-hydrolysis-driven protein transmembrane transporter activity	GO:0016021 integral component of membrane | GO:0005741 mitochondrial outer membrane
CGLO_14022	797.514	703.7	-0.18055	Down	0.812615	1137	EQB46893	gi|530464536|gb|EQB46893.1|	PI31 proteasome regulator [Colletotrichum gloeosporioides Cg-14]	--	--	--	--	GO:0000502 proteasome complex
CGLO_15787	340.553	278.61	-0.289632	Down	0.646487	1329	EQB45352	gi|530462456|gb|EQB45352.1|	CRAL/TRIO domain-containing protein [Colletotrichum gloeosporioides Cg-14]	cci:CC1G_03016	SEC14 cytosolic factor; K08254 glucan endo-1,3-alpha-glucosidase [EC:3.2.1.59]	--	--	--
CGLO_03817	0.405875	0.465765	0.198568	Up	0.902858	1515	EQB56179	gi|530476252|gb|EQB56179.1|	homogentisate 1,2-dioxygenase [Colletotrichum gloeosporioides Cg-14]	maj:MAA_00833	homogentisate-dioxygenase; K00451 homogentisate 1,2-dioxygenase [EC:1.13.11.5]	GO:0006559 L-phenylalanine catabolic process | GO:0055114 oxidation-reduction process | GO:0006570 tyrosine metabolic process	GO:0004411 homogentisate 1,2-dioxygenase activity	--
CGLO_11194	1249.45	913.988	-0.451045	Down	0.462874	816	EQB49473	gi|530468006|gb|EQB49473.1|	hypothetical protein CGLO_11194 [Colletotrichum gloeosporioides Cg-14]	cmt:CCM_02744	class I alpha-mannosidase; K01230 mannosyl-oligosaccharide alpha-1,2-mannosidase [EC:3.2.1.113]	--	--	--
CGLO_02289	594.72	609.381	0.0351346	Up	0.966181	2247	EQB57559	gi|530478145|gb|EQB57559.1|	Cullin family protein [Colletotrichum gloeosporioides Cg-14]	vda:VDAG_09015	cullin-1; K03347 cullin 1	GO:0000082 G1/S transition of mitotic cell cycle | GO:0042787 protein ubiquitination involved in ubiquitin-dependent protein catabolic process | GO:0000086 G2/M transition of mitotic cell cycle | GO:0031146 SCF-dependent proteasomal ubiquitin-dependent protein catabolic process	GO:0031625 ubiquitin protein ligase binding | GO:0030674 protein binding, bridging | GO:0004842 ubiquitin-protein transferase activity	GO:0019005 SCF ubiquitin ligase complex
CGLO_10823	1.35324	2.51157	0.892178	Up	0.520729	306	EQB49804	gi|530468425|gb|EQB49804.1|	SAM-dependent methyltransferase [Colletotrichum gloeosporioides Cg-14]	--	--	GO:0006479 protein methylation	GO:0004719 protein-L-isoaspartate (D-aspartate) O-methyltransferase activity	--
CGLO_12231	998.211	980.843	-0.0253233	Down	0.975248	951	EQB48545	gi|530466810|gb|EQB48545.1|	hypothetical protein CGLO_12231 [Colletotrichum gloeosporioides Cg-14]	tre:TRIREDRAFT_45736	cpc2; cross-pathway control WD-repeat-containing protein; K14753 guanine nucleotide-binding protein subunit beta-2-like 1 protein	GO:0007186 G-protein coupled receptor signaling pathway | GO:0017148 negative regulation of translation | GO:0034613 cellular protein localization | GO:0031139 positive regulation of conjugation with cellular fusion | GO:0031954 positive regulation of protein autophosphorylation | GO:0001403 invasive growth in response to glucose limitation | GO:0032956 regulation of actin cytoskeleton organizati…	GO:0005080 protein kinase C binding | GO:0004871 signal transducer activity | GO:0001965 G-protein alpha-subunit binding | GO:0043022 ribosome binding | GO:0005092 GDP-dissociation inhibitor activity	GO:0022627 cytosolic small ribosomal subunit
CGLO_09274	0.406988	0.357416	-0.18738	Down	0.902858	1296	EQB51208	gi|530470192|gb|EQB51208.1|	hypothetical protein CGLO_09274 [Colletotrichum gloeosporioides Cg-14]	tve:TRV_08013	thermophilic desulfurizing enzyme family protein; K00253 isovaleryl-CoA dehydrogenase [EC:1.3.8.4]	GO:0055114 oxidation-reduction process	GO:0050660 flavin adenine dinucleotide binding | GO:0016627 oxidoreductase activity, acting on the CH-CH group of donors	--
CGLO_01412	40.3543	52.3777	0.376229	Up	0.776881	1098	EQB58353	gi|530479098|gb|EQB58353.1|	hypothetical protein CGLO_01412 [Colletotrichum gloeosporioides Cg-14]	cgi:CGB_I4550W	hypothetical protein; K00010 myo-inositol 2-dehydrogenase / D-chiro-inositol 1-dehydrogenase [EC:1.1.1.18 1.1.1.369]	GO:0055114 oxidation-reduction process	GO:0016491 oxidoreductase activity	--
CGLO_06543	181.226	226.515	0.321814	Up	0.626692	588	EQB53710	gi|530473241|gb|EQB53710.1|	hypothetical protein CGLO_06543 [Colletotrichum gloeosporioides Cg-14]	vda:VDAG_01944	50S ribosomal protein Mrp49; K17440 large subunit ribosomal protein MRP49	--	--	GO:0005840 ribosome
CGLO_10937	123.401	70.9977	-0.797506	Down	0.413991	1608	EQB49703	gi|596722275|ref|XP_007286477.1|	MFS hexose transporter [Colletotrichum gloeosporioides Nara gc5] >gi|429849024|gb|ELA24444.1| MFS hexose transporter [Colletotrichum gloeosporioides Nara gc5] >gi|530468295|gb|EQB49703.1| MFS hexose transporter [Colletotrichum gloeosporioides Cg-14]	tre:TRIREDRAFT_65191	hypothetical protein; K08141 MFS transporter, SP family, general alpha glucoside:H+ symporter	GO:0055085 transmembrane transport	GO:0022891 substrate-specific transmembrane transporter activity	GO:0016021 integral component of membrane
CGLO_08830	25.6056	32.668	0.351422	Up	0.84493	558	EQB51611	gi|530470680|gb|EQB51611.1|	phosphoribosylformylglycinamidine synthase [Colletotrichum gloeosporioides Cg-14]	tmn:UCRPA7_4185	putative phosphoribosylformylglycinamidine synthase protein; K01952 phosphoribosylformylglycinamidine synthase [EC:6.3.5.3]	GO:0006189 'de novo' IMP biosynthetic process	GO:0004642 phosphoribosylformylglycinamidine synthase activity	--
CGLO_09778	19.3681	15.1248	-0.356766	Down	0.879144	471	EQB50749	gi|596679061|ref|XP_007278460.1|	hypothetical protein CGGC5_7424 [Colletotrichum gloeosporioides Nara gc5] >gi|429857617|gb|ELA32474.1| hypothetical protein CGGC5_7424 [Colletotrichum gloeosporioides Nara gc5] >gi|530469636|gb|EQB50749.1| hypothetical protein CGLO_09778 [Colletotrichum gloeosporioides Cg-14]	--	--	--	--	GO:0016021 integral component of membrane
CGLO_05564	3.47915	3.16218	-0.137813	Down	0.966181	273	EQB54576	gi|530474327|gb|EQB54576.1|	hypothetical protein CGLO_05564 [Colletotrichum gloeosporioides Cg-14]	--	--	--	--	--
CGLO_08469	54.8044	56.9135	0.054477	Up	0.966181	2391	EQB51943	gi|530471093|gb|EQB51943.1|	integral membrane protein [Colletotrichum gloeosporioides Cg-14]	nhe:NECHADRAFT_75847	hypothetical protein; K05857 phosphatidylinositol phospholipase C, delta [EC:3.1.4.11]	--	--	GO:0016021 integral component of membrane
CGLO_01611	185.528	238.632	0.36315	Up	0.529133	2262	EQB58172	gi|530478886|gb|EQB58172.1|	hypothetical protein CGLO_01611 [Colletotrichum gloeosporioides Cg-14]	--	--	GO:0006397 mRNA processing	--	--
CGLO_17380	93.4302	148.79	0.671312	Up	0.340388	1605	EQB43901	gi|530460608|gb|EQB43901.1|	hypothetical protein CGLO_17380 [Colletotrichum gloeosporioides Cg-14]	--	--	--	--	--
CGLO_11300	0.388812	0.341454	-0.18738	Down	0.902858	1659	EQB49383	gi|530467887|gb|EQB49383.1|	hypothetical protein CGLO_11300 [Colletotrichum gloeosporioides Cg-14]	abp:AGABI1DRAFT123150	AGABI1DRAFT_123150; hypothetical protein; K20154 pyranose dehydrogenase [EC:1.1.99.29]	GO:0055114 oxidation-reduction process	GO:0050660 flavin adenine dinucleotide binding | GO:0016614 oxidoreductase activity, acting on CH-OH group of donors	--
CGLO_07421	0.143864	0.14924	0.0529239	Up	0.966181	867	EQB52910	gi|530472271|gb|EQB52910.1|	hypothetical protein CGLO_07421 [Colletotrichum gloeosporioides Cg-14]	ela:UCREL1_11380	putative dna replication licensing factor mcm3 protein; K02541 DNA replication licensing factor MCM3 [EC:3.6.4.12]	GO:0055114 oxidation-reduction process	GO:0016491 oxidoreductase activity	--
CGLO_02024	6.06545	11.0215	0.861633	Up	0.51032	351	EQB57802	gi|530478438|gb|EQB57802.1|	hypothetical protein CGLO_02024 [Colletotrichum gloeosporioides Cg-14]	--	--	GO:0006355 regulation of transcription, DNA-templated	GO:0043565 sequence-specific DNA binding | GO:0003700 transcription factor activity, sequence-specific DNA binding	--
CGLO_12096	514.165	621.954	0.274579	Up	0.732201	1524	EQB48659	gi|530466953|gb|EQB48659.1|	hypothetical protein CGLO_12096 [Colletotrichum gloeosporioides Cg-14]	vda:VDAG_08632	cysteine desulfurase; K04487 cysteine desulfurase [EC:2.8.1.7]	GO:0044571 [2Fe-2S] cluster assembly | GO:0006879 cellular iron ion homeostasis | GO:0002098 tRNA wobble uridine modification | GO:0070903 mitochondrial tRNA thio-modification	GO:0031071 cysteine desulfurase activity | GO:0030170 pyridoxal phosphate binding	GO:0005739 mitochondrion | GO:1990221 L-cysteine desulfurase complex | GO:0005634 nucleus
CGLO_12189	7.85176	9.73192	0.309708	Up	0.839232	1176	EQB48561	gi|530466829|gb|EQB48561.1|	fumarylacetoacetase [Colletotrichum gloeosporioides Cg-14]	nhe:NECHADRAFT_64674	hypothetical protein; K01555 fumarylacetoacetase [EC:3.7.1.2]	GO:0009072 aromatic amino acid family metabolic process	GO:0004334 fumarylacetoacetase activity	--
CGLO_11733	0.887029	1.46866	0.727442	Up	0.569866	312	EQB48977	gi|530467372|gb|EQB48977.1|	hypothetical protein CGLO_11733 [Colletotrichum gloeosporioides Cg-14]	--	--	--	--	--
CGLO_05569	12.5751	19.9814	0.668092	Up	0.581556	1983	EQB54572	gi|530474322|gb|EQB54572.1|	hypothetical protein CGLO_05569 [Colletotrichum gloeosporioides Cg-14]	--	--	--	--	GO:0016021 integral component of membrane
CGLO_05925	6.51272	14.2102	1.1256	Up	0.360834	2193	EQB54267	gi|530473940|gb|EQB54267.1|	hypothetical protein CGLO_05925 [Colletotrichum gloeosporioides Cg-14]	--	--	GO:0006357 regulation of transcription from RNA polymerase II promoter	GO:0008270 zinc ion binding | GO:0000981 RNA polymerase II transcription factor activity, sequence-specific DNA binding | GO:0003677 DNA binding	GO:0005634 nucleus
CGLO_14738	92.2651	49.7548	-0.890948	Down	0.267691	711	EQB46245	gi|530463613|gb|EQB46245.1|	hypothetical protein CGLO_14738 [Colletotrichum gloeosporioides Cg-14]	--	--	--	--	--
CGLO_17588	761.144	709.808	-0.100739	Down	0.938616	390	EQB43727	gi|530460394|gb|EQB43727.1|	ctr copper transporter [Colletotrichum gloeosporioides Cg-14]	val:VDBG_04553	hypothetical protein; K14686 solute carrier family 31 (copper transporter), member 1	GO:0035434 copper ion transmembrane transport	GO:0005375 copper ion transmembrane transporter activity	GO:0016021 integral component of membrane
CGLO_16123	54.7468	54.7479	2.86e-05	Up	0.99994	1200	EQB45077	gi|530462105|gb|EQB45077.1|	hypothetical protein CGLO_16123 [Colletotrichum gloeosporioides Cg-14]	tmn:UCRPA7_8769	putative actin-binding protein; K05768 gelsolin	--	GO:0003779 actin binding	--
CGLO_11609	9.23436	13.2363	0.519418	Up	0.790278	741	EQB49086	gi|530467516|gb|EQB49086.1|	MOSC domain-containing protein [Colletotrichum gloeosporioides Cg-14]	ani:AN5835.2	hypothetical protein; K00600 glycine hydroxymethyltransferase [EC:2.1.2.1]	GO:0008152 metabolic process	GO:0030151 molybdenum ion binding | GO:0030170 pyridoxal phosphate binding | GO:0003824 catalytic activity	--
CGLO_09393	3.51173	3.71751	0.0821564	Up	0.971132	399	EQB51097	gi|530470058|gb|EQB51097.1|	histone H4 [Colletotrichum gloeosporioides Cg-14]	nhe:NECHADRAFT_105899	HFO2103; hypothetical protein; K11254 histone H4	GO:0006334 nucleosome assembly	GO:0003677 DNA binding | GO:0046982 protein heterodimerization activity	GO:0000786 nucleosome | GO:0005634 nucleus
CGLO_07757	191.834	200.756	0.0655806	Up	0.955671	1899	EQB52605	gi|530471897|gb|EQB52605.1|	hypothetical protein CGLO_07757 [Colletotrichum gloeosporioides Cg-14]	--	--	--	--	GO:0005634 nucleus | GO:0016021 integral component of membrane
CGLO_04464	1.99336	2.80879	0.494742	Up	0.853363	1527	EQB55598	gi|530475555|gb|EQB55598.1|	major facilitator superfamily transporter [Colletotrichum gloeosporioides Cg-14]	aor:AOR_1_1468054	AO090011000870; MFS allantoate transporter; K08192 MFS transporter, ACS family, allantoate permease	GO:0055085 transmembrane transport	--	GO:0016021 integral component of membrane
CGLO_16883	6.57794	17.5273	1.4139	Up	0.122801	1443	EQB44376	gi|530461210|gb|EQB44376.1|	hypothetical protein CGLO_16883 [Colletotrichum gloeosporioides Cg-14]	pte:PTT_08985	hypothetical protein; K01230 mannosyl-oligosaccharide alpha-1,2-mannosidase [EC:3.2.1.113]	--	--	--
CGLO_06105	0.866371	1.22081	0.494787	Up	0.729993	720	EQB54104	gi|530473730|gb|EQB54104.1|	hypothetical protein CGLO_06105 [Colletotrichum gloeosporioides Cg-14]	--	--	--	--	--
CGLO_12512	299.626	338.306	0.175166	Up	0.902858	519	EQB48261	gi|530466451|gb|EQB48261.1|	thioredoxin [Colletotrichum gloeosporioides Cg-14]	bcom:BAUCODRAFT_442650	hypothetical protein; K03671 thioredoxin 1	GO:0045454 cell redox homeostasis | GO:0006662 glycerol ether metabolic process | GO:0055114 oxidation-reduction process	GO:0015035 protein disulfide oxidoreductase activity	GO:0005623 cell
CGLO_06210	99.3209	91.6867	-0.115386	Down	0.938616	966	EQB54007	gi|596664276|ref|XP_007275706.1|	ER to golgi transport protein yif1 [Colletotrichum gloeosporioides Nara gc5] >gi|429860492|gb|ELA35228.1| ER to golgi transport protein yif1 [Colletotrichum gloeosporioides Nara gc5]	vda:VDAG_01861	transport protein yif1; K20362 protein transport protein YIF1	GO:0070317 negative regulation of G0 to G1 transition | GO:0006888 ER to Golgi vesicle-mediated transport	--	GO:0005789 endoplasmic reticulum membrane | GO:0030134 ER to Golgi transport vesicle | GO:0030173 integral component of Golgi membrane
CGLO_10940	241.87	181.928	-0.410864	Down	0.476722	2013	EQB49700	gi|530468291|gb|EQB49700.1|	hypothetical protein CGLO_10940 [Colletotrichum gloeosporioides Cg-14]	yli:YALI0D20394g	YALI0D20394p; K09245 transcriptional activator protein UGA3	GO:0006357 regulation of transcription from RNA polymerase II promoter	GO:0000981 RNA polymerase II transcription factor activity, sequence-specific DNA binding | GO:0008270 zinc ion binding	GO:0005634 nucleus
CGLO_00312	14.0315	21.5537	0.619268	Up	0.636585	1287	EQB59328	gi|530480297|gb|EQB59328.1|	hypothetical protein CGLO_00312 [Colletotrichum gloeosporioides Cg-14]	pcs:Pc21g10230	Pc21g10230; K00480 salicylate hydroxylase [EC:1.14.13.1]	GO:0055114 oxidation-reduction process	GO:0071949 FAD binding | GO:0016491 oxidoreductase activity	--
CGLO_07262	312.478	375.175	0.263808	Up	0.705372	822	EQB53059	gi|530472447|gb|EQB53059.1|	hypothetical protein CGLO_07262 [Colletotrichum gloeosporioides Cg-14]	pan:PODANSg6636	hypothetical protein; K02726 20S proteasome subunit alpha 2 [EC:3.4.25.1]	GO:0043161 proteasome-mediated ubiquitin-dependent protein catabolic process | GO:0010499 proteasomal ubiquitin-independent protein catabolic process	GO:0004298 threonine-type endopeptidase activity	GO:0019773 proteasome core complex, alpha-subunit complex | GO:0042175 nuclear outer membrane-endoplasmic reticulum membrane network | GO:0034515 proteasome storage granule | GO:0005634 nucleus
CGLO_04294	0.73858	0.833106	0.173745	Up	0.938616	372	EQB55746	gi|530475724|gb|EQB55746.1|	hypothetical protein CGLO_04294 [Colletotrichum gloeosporioides Cg-14]	--	--	--	--	--
CGLO_16072	294.591	251.582	-0.227684	Down	0.902858	1143	EQB45117	gi|530462155|gb|EQB45117.1|	hypothetical protein CGLO_16072 [Colletotrichum gloeosporioides Cg-14]	ela:UCREL1_1004	putative sterol 24-c-methyltransferase protein; K00559 sterol 24-C-methyltransferase [EC:2.1.1.41]	GO:0032259 methylation | GO:0016126 sterol biosynthetic process	GO:0003838 sterol 24-C-methyltransferase activity	--
CGLO_11527	9267.9	2842.53	-1.70507	Down	0.0130529	1236	EQB49134	gi|530467584|gb|EQB49134.1|	NADH:flavin oxidoreductase/NADH oxidase [Colletotrichum gloeosporioides Cg-14]	bze:COCCADRAFT_102377	hypothetical protein; K00354 NADPH2 dehydrogenase [EC:1.6.99.1]	GO:0055114 oxidation-reduction process	GO:0016491 oxidoreductase activity | GO:0010181 FMN binding	--
CGLO_14194	14.1181	12.8253	-0.138561	Down	0.956424	417	EQB46751	gi|530464325|gb|EQB46751.1|	hypothetical protein CGLO_14194 [Colletotrichum gloeosporioides Cg-14]	--	--	--	--	--
CGLO_17715	0.290875	0.318971	0.133025	Up	0.938616	792	EQB43626	gi|530460256|gb|EQB43626.1|	hypothetical protein CGLO_17715 [Colletotrichum gloeosporioides Cg-14]	--	--	--	--	GO:0016021 integral component of membrane
CGLO_10460	0.182066	0.169018	-0.107279	Down	0.94343	498	EQB50129	gi|530468850|gb|EQB50129.1|	hypothetical protein CGLO_10460 [Colletotrichum gloeosporioides Cg-14]	--	--	--	--	--
CGLO_17895	27.347	46.7732	0.774299	Up	0.524088	2019	EQB43440	gi|530460012|gb|EQB43440.1|	hypothetical protein CGLO_17895 [Colletotrichum gloeosporioides Cg-14]	afv:AFLA_015300	L-lactate dehydrogenase, putative; K00101 L-lactate dehydrogenase (cytochrome) [EC:1.1.2.3]	GO:0006357 regulation of transcription from RNA polymerase II promoter	GO:0008270 zinc ion binding | GO:0000981 RNA polymerase II transcription factor activity, sequence-specific DNA binding | GO:0003677 DNA binding	GO:0005634 nucleus
CGLO_11876	2.06174	7.11469	1.78694	Up	0.0591022	1356	EQB48853	gi|530467197|gb|EQB48853.1|	hypothetical protein CGLO_11876 [Colletotrichum gloeosporioides Cg-14]	pno:SNOG_15138	hypothetical protein; K17724 aconitate decarboxylase [EC:4.1.1.6]	GO:0008152 metabolic process	GO:0016829 lyase activity	--
CGLO_16228	0.942893	1.00707	0.0949925	Up	0.966181	2742	EQB44963	gi|530461968|gb|EQB44963.1|	hypothetical protein CGLO_16228 [Colletotrichum gloeosporioides Cg-14]	--	--	--	GO:0008270 zinc ion binding | GO:0003676 nucleic acid binding	--
CGLO_08493	0.5743	0.529166	-0.118083	Down	0.94343	864	EQB51913	gi|530471054|gb|EQB51913.1|	metalloprotease [Colletotrichum gloeosporioides Cg-14]	--	--	GO:0006508 proteolysis	GO:0008237 metallopeptidase activity	--
CGLO_05361	3578.02	4846.01	0.437637	Up	0.541722	2313	EQB54756	gi|530474555|gb|EQB54756.1|	hypothetical protein CGLO_05361 [Colletotrichum gloeosporioides Cg-14]	npa:UCRNP2_4015	putative 5-methyltetrahydropteroyltriglutamate-homocysteine methyltransferase protein; K00549 5-methyltetrahydropteroyltriglutamate--homocysteine methyltransferase [EC:2.1.1.14]	GO:0032259 methylation | GO:0046084 adenine biosynthetic process | GO:0019280 L-methionine biosynthetic process from homoserine via O-acetyl-L-homoserine and cystathionine	GO:0008270 zinc ion binding | GO:0003871 5-methyltetrahydropteroyltriglutamate-homocysteine S-methyltransferase activity	GO:0005829 cytosol | GO:0005634 nucleus
CGLO_17779	3.23125	2.23782	-0.530001	Down	0.806698	1536	EQB43555	gi|530460165|gb|EQB43555.1|	hypothetical protein CGLO_17779 [Colletotrichum gloeosporioides Cg-14]	mbe:MBM_09985	myo-inositol-1-phosphate synthase; K01858 myo-inositol-1-phosphate synthase [EC:5.5.1.4]	--	--	--
CGLO_00957	0.373852	0.328316	-0.18738	Down	0.902858	948	EQB58752	gi|530479592|gb|EQB58752.1|	enoyl-CoA hydratase/isomerase [Colletotrichum gloeosporioides Cg-14]	pgr:PGTG_08623	enoyl-CoA hydratase; K07511 enoyl-CoA hydratase [EC:4.2.1.17]	GO:0008152 metabolic process	GO:0016853 isomerase activity	--
CGLO_16962	911.272	1216.5	0.416782	Up	0.524395	1572	EQB44307	gi|530461124|gb|EQB44307.1|	L-ornithine 5-monooxygenase [Colletotrichum gloeosporioides Cg-14]	vda:VDAG_05313	L-ornithine 5-monooxygenase; K10531 L-ornithine N5-oxygenase [EC:1.13.12.-]	GO:0055114 oxidation-reduction process	GO:0004497 monooxygenase activity	--
CGLO_09451	9.54521	6.92526	-0.462908	Down	0.853363	531	EQB51045	gi|530469994|gb|EQB51045.1|	hypothetical protein CGLO_09451 [Colletotrichum gloeosporioides Cg-14]	afm:AFUA_4G03230	extracellular guanyl-specific ribonuclease RntA; K01167 ribonuclease T1 [EC:3.1.27.3]	GO:0090502 RNA phosphodiester bond hydrolysis, endonucleolytic	GO:0003723 RNA binding | GO:0004521 endoribonuclease activity	--
CGLO_15841	253.629	271.678	0.0991768	Up	0.966181	1935	EQB45305	gi|530462396|gb|EQB45305.1|	hypothetical protein CGLO_15841 [Colletotrichum gloeosporioides Cg-14]	--	--	--	--	--
CGLO_16645	261.3	211.038	-0.308204	Down	0.730174	402	EQB44602	gi|530461504|gb|EQB44602.1|	hypothetical protein CGLO_16645 [Colletotrichum gloeosporioides Cg-14]	val:VDBG_03433	hypothetical protein; K17430 large subunit ribosomal protein L49	GO:0006412 translation	GO:0003735 structural constituent of ribosome	GO:0005840 ribosome
CGLO_03678	2.14914	3.51518	0.709838	Up	0.701111	1626	EQB56326	gi|530476425|gb|EQB56326.1|	hypothetical protein CGLO_03678 [Colletotrichum gloeosporioides Cg-14]	--	--	--	--	--
CGLO_04133	15.47	22.4309	0.536012	Up	0.753692	1071	EQB55893	gi|530475907|gb|EQB55893.1|	hypothetical protein CGLO_04133 [Colletotrichum gloeosporioides Cg-14]	--	--	--	--	--
CGLO_04714	295.372	216.417	-0.448724	Down	0.706743	1056	EQB55357	gi|596711165|ref|XP_007284440.1|	2-nitropropane dioxygenase [Colletotrichum gloeosporioides Nara gc5] >gi|429851302|gb|ELA26500.1| 2-nitropropane dioxygenase [Colletotrichum gloeosporioides Nara gc5] >gi|530475258|gb|EQB55357.1| 2-nitropropane dioxygenase [Colletotrichum gloeosporioides Cg-14]	fme:FOMMEDRAFT_16191	2-nitropropane dioxygenase; K00459 nitronate monooxygenase [EC:1.13.12.16]	GO:0055114 oxidation-reduction process	GO:0051213 dioxygenase activity | GO:0018580 nitronate monooxygenase activity	--
CGLO_13533	2.01976	1.7556	-0.202217	Down	0.94343	882	EQB47333	gi|530465183|gb|EQB47333.1|	hypothetical protein CGLO_13533 [Colletotrichum gloeosporioides Cg-14]	afm:AFUA_5G09290	short chain dehydrogenase/reductase family oxidoreductase; K00019 3-hydroxybutyrate dehydrogenase [EC:1.1.1.30]	GO:0006820 anion transport | GO:0055114 oxidation-reduction process	GO:0016491 oxidoreductase activity	GO:0016020 membrane
CGLO_15815	33.8976	45.681	0.430412	Up	0.693843	1527	EQB45329	gi|530462427|gb|EQB45329.1|	hypothetical protein CGLO_15815 [Colletotrichum gloeosporioides Cg-14]	vda:VDAG_07308	Poly(A) RNA polymerase cid14; K03514 non-canonical poly(A) RNA polymerase PAPD5/7 [EC:2.7.7.19]	GO:0016075 rRNA catabolic process | GO:0031125 rRNA 3'-end processing	GO:0043023 ribosomal large subunit binding | GO:0004652 polynucleotide adenylyltransferase activity | GO:0016853 isomerase activity	GO:0005730 nucleolus | GO:0031499 TRAMP complex
CGLO_12665	4.15154	4.16621	0.00509056	Up	0.997096	315	EQB48129	gi|530466268|gb|EQB48129.1|	carboxylesterase [Colletotrichum gloeosporioides Cg-14]	afm:AFUA_7G01180	extracellular lipase; K01046 triacylglycerol lipase [EC:3.1.1.3]	GO:0008152 metabolic process	GO:0016787 hydrolase activity	--
CGLO_11852	10.1347	11.3206	0.159649	Up	0.955848	876	EQB48871	gi|530467226|gb|EQB48871.1|	hypothetical protein CGLO_11852 [Colletotrichum gloeosporioides Cg-14]	--	--	GO:0032259 methylation	GO:0008168 methyltransferase activity	--
CGLO_11077	2.53258	2.21212	-0.195173	Down	0.94343	924	EQB49569	gi|530468127|gb|EQB49569.1|	AFUA_2G17970 family ergot alkaloid biosynthesis protein [Colletotrichum gloeosporioides Cg-14]	pbn:PADG_07739	hypothetical protein; K19183 festuclavine dehydrogenase [EC:1.5.1.44]	--	--	--
CGLO_10930	110.466	136.036	0.300383	Up	0.753692	2316	EQB49718	gi|530468314|gb|EQB49718.1|	dihydrouridine synthase [Colletotrichum gloeosporioides Cg-14]	fpu:FPSE_00637	hypothetical protein; K05544 tRNA-dihydrouridine synthase 3 [EC:1.3.1.89]	GO:0002943 tRNA dihydrouridine synthesis | GO:0055114 oxidation-reduction process	GO:0050660 flavin adenine dinucleotide binding | GO:0046872 metal ion binding | GO:0017150 tRNA dihydrouridine synthase activity	GO:0005737 cytoplasm | GO:0005634 nucleus
CGLO_14258	158.523	191.485	0.272539	Up	0.894993	561	EQB46675	gi|530464229|gb|EQB46675.1|	zinc knuckle [Colletotrichum gloeosporioides Cg-14]	--	--	--	GO:0008270 zinc ion binding | GO:0003676 nucleic acid binding	--
CGLO_17842	0.464806	0.48142	0.0506679	Up	0.968093	1677	EQB43489	gi|530460075|gb|EQB43489.1|	sulfatase [Colletotrichum gloeosporioides Cg-14]	afm:AFUA_8G02520	arylsulfatase; K01130 arylsulfatase [EC:3.1.6.1]	GO:0008152 metabolic process	GO:0008484 sulfuric ester hydrolase activity	--
CGLO_13593	25.4104	16.7913	-0.597702	Down	0.745437	1848	EQB47266	gi|530465092|gb|EQB47266.1|	hypothetical protein CGLO_13593 [Colletotrichum gloeosporioides Cg-14]	--	--	GO:0006357 regulation of transcription from RNA polymerase II promoter	GO:0000981 RNA polymerase II transcription factor activity, sequence-specific DNA binding | GO:0008270 zinc ion binding	GO:0005634 nucleus
CGLO_05273	0.349448	0.342927	-0.0271774	Down	0.979526	1530	EQB54864	gi|530474672|gb|EQB54864.1|	hypothetical protein CGLO_05273 [Colletotrichum gloeosporioides Cg-14]	--	--	--	--	--
CGLO_17926	3405.57	2102.95	-0.695485	Down	0.355574	744	EQB43413	gi|530459977|gb|EQB43413.1|	hypothetical protein CGLO_17926 [Colletotrichum gloeosporioides Cg-14]	pco:PHACADRAFT_246704	hypothetical protein; K00059 3-oxoacyl-[acyl-carrier protein] reductase [EC:1.1.1.100]	GO:0055114 oxidation-reduction process	GO:0016491 oxidoreductase activity	--
CGLO_03528	97.1899	139.467	0.521042	Up	0.41941	1260	EQB56454	gi|530476578|gb|EQB56454.1|	FAD binding domain-containing protein [Colletotrichum gloeosporioides Cg-14]	bcom:BAUCODRAFT_163477	hypothetical protein; K00480 salicylate hydroxylase [EC:1.14.13.1]	GO:0055114 oxidation-reduction process	GO:0071949 FAD binding | GO:0004497 monooxygenase activity	--
CGLO_08330	31.0821	30.8051	-0.0129138	Down	0.98956	1824	EQB52072	gi|530471250|gb|EQB52072.1|	X-Pro dipeptidyl-peptidase C-terminal non-catalytic domain-containing protein [Colletotrichum gloeosporioides Cg-14]	bze:COCCADRAFT_92105	hypothetical protein; K06978 uncharacterized protein	GO:0006508 proteolysis	GO:0008239 dipeptidyl-peptidase activity	--
CGLO_00662	7.81924	4.19302	-0.899038	Down	0.550165	492	EQB59015	gi|530479913|gb|EQB59015.1|	PWI domain-containing protein [Colletotrichum gloeosporioides Cg-14]	tmn:UCRPA7_6570	putative pwi domain mrna processing protein; K13171 serine/arginine repetitive matrix protein 1	GO:0006397 mRNA processing	--	--
CGLO_05150	0.149666	0.155258	0.0529239	Up	0.966181	1488	EQB54967	gi|530474791|gb|EQB54967.1|	heterokaryon incompatibility protein [Colletotrichum gloeosporioides Cg-14]	aor:AOR_1_946054	AO090011000559; DNA polymerase alpha catalytic subunit; K02320 DNA polymerase alpha subunit A [EC:2.7.7.7]	--	--	--
CGLO_13229	5.16919	5.91356	0.19409	Up	0.94343	1830	EQB47611	gi|530465579|gb|EQB47611.1|	hypothetical protein CGLO_13229 [Colletotrichum gloeosporioides Cg-14]	ure:UREG_06498	hypothetical protein; K15385 aspyridone synthetase trans-acting enoyl reductase	GO:0006351 transcription, DNA-templated	GO:0003677 DNA binding | GO:0008270 zinc ion binding	GO:0005634 nucleus
CGLO_12094	360.523	349.215	-0.0459734	Down	0.966181	687	EQB48657	gi|530466951|gb|EQB48657.1|	hypothetical protein CGLO_12094 [Colletotrichum gloeosporioides Cg-14]	--	--	--	--	--
CGLO_16382	84.4932	98.0058	0.214033	Up	0.879144	4626	EQB44834	gi|530461804|gb|EQB44834.1|	hypothetical protein CGLO_16382 [Colletotrichum gloeosporioides Cg-14]	val:VDBG_01678	WD repeat-containing protein; K20409 WD repeat-containing protein 59	--	GO:0008270 zinc ion binding	GO:0035859 Seh1-associated complex | GO:0097042 extrinsic component of fungal-type vacuolar membrane
CGLO_01279	103.281	116.764	0.177012	Up	0.902858	2388	EQB58472	gi|530479236|gb|EQB58472.1|	hypothetical protein CGLO_01279 [Colletotrichum gloeosporioides Cg-14]	--	--	GO:0032774 RNA biosynthetic process	GO:0003899 DNA-directed RNA polymerase activity	--
CGLO_13208	220.195	193.533	-0.186202	Down	0.853363	3636	EQB47629	gi|530465605|gb|EQB47629.1|	cellular morphogenesis protein [Colletotrichum gloeosporioides Cg-14]	--	--	GO:0000282 cellular bud site selection	--	GO:0005621 cellular bud scar | GO:0005935 cellular bud neck | GO:0016021 integral component of membrane
CGLO_15414	394.636	338.92	-0.219581	Down	0.919067	1554	EQB45675	gi|530462858|gb|EQB45675.1|	hypothetical protein CGLO_15414 [Colletotrichum gloeosporioides Cg-14]	--	--	--	--	--
CGLO_02159	3.95414	3.87742	-0.0282681	Down	0.98633	717	EQB57678	gi|530478297|gb|EQB57678.1|	hypothetical protein CGLO_02159 [Colletotrichum gloeosporioides Cg-14]	--	--	--	--	--
CGLO_16918	5.6977	5.33414	-0.0951237	Down	0.960382	171	EQB44347	gi|615459702|ref|XP_007597502.1|	40S ribosomal protein S29 [Colletotrichum fioriniae PJ7] >gi|588897610|gb|EXF78855.1| 40S ribosomal protein S29 [Colletotrichum fioriniae PJ7] >gi|996605628|gb|KXH43169.1| 40S ribosomal protein S29 [Colletotrichum simmondsii] >gi|996649370|gb|KXH67199.1| 40S ribosomal protein S29 [Colletotrichum salicis]	fpu:FPSE_03202	hypothetical protein; K02980 small subunit ribosomal protein S29e	GO:0006412 translation	GO:0003735 structural constituent of ribosome | GO:0003723 RNA binding	GO:0015935 small ribosomal subunit | GO:0005634 nucleus | GO:0005829 cytosol
CGLO_09972	2019.56	2515.21	0.316637	Up	0.816108	738	EQB50580	gi|530469424|gb|EQB50580.1|	hypothetical protein CGLO_09972 [Colletotrichum gloeosporioides Cg-14]	nhe:NECHADRAFT_87890	hypothetical protein; K00059 3-oxoacyl-[acyl-carrier protein] reductase [EC:1.1.1.100]	GO:0055114 oxidation-reduction process	GO:0016491 oxidoreductase activity	--
CGLO_03517	127.225	195.474	0.619592	Up	0.164092	915	EQB56469	gi|530476594|gb|EQB56469.1|	hypothetical protein CGLO_03517 [Colletotrichum gloeosporioides Cg-14]	maj:MAA_05328	ribosome biogenesis protein Brx1; K14820 ribosome biogenesis protein BRX1	GO:0000027 ribosomal large subunit assembly	GO:0008097 5S rRNA binding | GO:0042134 rRNA primary transcript binding	GO:0005730 nucleolus | GO:0032153 cell division site | GO:0005829 cytosol | GO:0030687 preribosome, large subunit precursor
CGLO_11442	0.149666	0.155258	0.0529239	Up	0.966181	2565	EQB49240	gi|530467716|gb|EQB49240.1|	hypothetical protein CGLO_11442 [Colletotrichum gloeosporioides Cg-14]	nhe:NECHADRAFT_39687	hypothetical protein; K05349 beta-glucosidase [EC:3.2.1.21]	GO:0005975 carbohydrate metabolic process	GO:0004553 hydrolase activity, hydrolyzing O-glycosyl compounds	--
CGLO_15041	110.948	53.7642	-1.04517	Down	0.260975	834	EQB45987	gi|530463268|gb|EQB45987.1|	fumarylacetoacetate hydrolase [Colletotrichum gloeosporioides Cg-14]	bze:COCCADRAFT_37452	hypothetical protein; K03142 transcription initiation factor TFIIH subunit 2	GO:0008152 metabolic process	GO:0016787 hydrolase activity	--
CGLO_17469	2.44417	2.22823	-0.133451	Down	0.966181	1740	EQB43835	gi|530460529|gb|EQB43835.1|	CoA-transferase family III [Colletotrichum gloeosporioides Cg-14]	bcom:BAUCODRAFT_21543	hypothetical protein; K18703 succinate---hydroxymethylglutarate CoA-transferase [EC:2.8.3.13]	GO:0007218 neuropeptide signaling pathway | GO:0008152 metabolic process	GO:0016740 transferase activity	--
CGLO_11808	133.09	88.7794	-0.584105	Down	0.491294	936	EQB48908	gi|596717421|ref|XP_007285549.1|	set domain protein [Colletotrichum gloeosporioides Nara gc5] >gi|429850088|gb|ELA25393.1| set domain protein [Colletotrichum gloeosporioides Nara gc5]	bze:COCCADRAFT_98952	hypothetical protein; K14778 ATP-dependent RNA helicase DDX49/DBP8 [EC:3.6.4.13]	--	--	--
CGLO_06238	0.677804	0.653644	-0.0523624	Down	0.973298	1101	EQB53982	gi|530473577|gb|EQB53982.1|	hypothetical protein CGLO_06238 [Colletotrichum gloeosporioides Cg-14]	tms:TREMEDRAFT_73790	hypothetical protein; K19245 sulfonate dioxygenase [EC:1.14.11.-]	GO:0055114 oxidation-reduction process	GO:0016491 oxidoreductase activity	--
CGLO_01078	52.8132	30.3709	-0.79821	Down	0.268414	480	EQB58651	gi|596725635|ref|XP_007287122.1|	bZIP transcription factor [Colletotrichum gloeosporioides Nara gc5] >gi|429848287|gb|ELA23790.1| bZIP transcription factor [Colletotrichum gloeosporioides Nara gc5]	tre:TRIREDRAFT_2599	hypothetical protein; K20316 short coiled-coil protein	--	--	--
CGLO_03874	19.8858	26.9742	0.439844	Up	0.860888	477	EQB56131	gi|530476194|gb|EQB56131.1|	hypothetical protein CGLO_03874 [Colletotrichum gloeosporioides Cg-14]	--	--	--	--	--
CGLO_17640	2.55762	3.57129	0.481643	Up	0.853363	1065	EQB43681	gi|530460335|gb|EQB43681.1|	hypothetical protein CGLO_17640 [Colletotrichum gloeosporioides Cg-14]	--	--	--	--	--
CGLO_02823	34.0646	48.854	0.520203	Up	0.722117	432	EQB57085	gi|596676998|ref|XP_007278115.1|	mitosis protein dim1 [Colletotrichum gloeosporioides Nara gc5] >gi|429857992|gb|ELA32828.1| mitosis protein dim1 [Colletotrichum gloeosporioides Nara gc5]	ela:UCREL1_4023	putative mitosis protein dim1 protein; K12859 U5 snRNP protein, DIM1 family	GO:0000398 mRNA splicing, via spliceosome	--	GO:0005682 U5 snRNP | GO:0046540 U4/U6 x U5 tri-snRNP complex | GO:0005681 spliceosomal complex
CGLO_00263	1.21075	1.31473	0.118872	Up	0.966181	1278	EQB59359	gi|530480341|gb|EQB59359.1|	hypothetical protein CGLO_00263 [Colletotrichum gloeosporioides Cg-14]	pno:SNOG_12539	hypothetical protein; K19787 carnosine N-methyltransferase [EC:2.1.1.22]	--	--	--
CGLO_16311	23.4154	17.6499	-0.407798	Down	0.817598	1449	EQB44893	gi|530461879|gb|EQB44893.1|	homogentisate 1,2-dioxygenase [Colletotrichum gloeosporioides Cg-14]	nhe:NECHADRAFT_40957	hypothetical protein; K00451 homogentisate 1,2-dioxygenase [EC:1.13.11.5]	GO:0006559 L-phenylalanine catabolic process | GO:0055114 oxidation-reduction process | GO:0006570 tyrosine metabolic process	GO:0004411 homogentisate 1,2-dioxygenase activity	--
CGLO_11408	40.8335	167.208	2.03382	Up	0.000387685	1236	EQB49275	gi|530467758|gb|EQB49275.1|	glycosyltransferase family 25 [Colletotrichum gloeosporioides Cg-14]	--	--	GO:0008152 metabolic process	GO:0016740 transferase activity	GO:0016021 integral component of membrane
CGLO_16172	295.421	248.618	-0.24884	Down	0.775393	4962	EQB45009	gi|530462026|gb|EQB45009.1|	gelsolin [Colletotrichum gloeosporioides Cg-14]	mgl:MGL_1152	hypothetical protein; K00601 phosphoribosylglycinamide formyltransferase [EC:2.1.2.2]	GO:0051016 barbed-end actin filament capping | GO:0051014 actin filament severing | GO:0045010 actin nucleation	GO:0005509 calcium ion binding | GO:0003779 actin binding	--
CGLO_01524	293.214	285.922	-0.0363356	Down	0.966181	3678	EQB58252	gi|530478983|gb|EQB58252.1|	DEAD/DEAH box helicase [Colletotrichum gloeosporioides Cg-14]	fgr:FGSG_01024	pre-mRNA-processing ATP-dependent RNA helicase PRP5; K12811 ATP-dependent RNA helicase DDX46/PRP5 [EC:3.6.4.13]	GO:0008152 metabolic process	GO:0008186 RNA-dependent ATPase activity | GO:0003676 nucleic acid binding | GO:0005524 ATP binding | GO:0004386 helicase activity	--
CGLO_13721	320.74	347.425	0.115295	Up	0.914455	1521	EQB47172	gi|530464953|gb|EQB47172.1|	ThiF family protein [Colletotrichum gloeosporioides Cg-14]	--	--	GO:0008152 metabolic process	GO:0008641 small protein activating enzyme activity	GO:0016021 integral component of membrane
CGLO_15729	4416.57	3378.56	-0.386521	Down	0.32187	1389	EQB45396	gi|530462514|gb|EQB45396.1|	pfkB family carbohydrate kinase [Colletotrichum gloeosporioides Cg-14]	tmn:UCRPA7_1682	putative adenosine kinase protein; K00856 adenosine kinase [EC:2.7.1.20]	GO:0006144 purine nucleobase metabolic process | GO:0006169 adenosine salvage | GO:0006167 AMP biosynthetic process | GO:0016310 phosphorylation	GO:0004001 adenosine kinase activity	GO:0005829 cytosol | GO:0005634 nucleus
CGLO_10640	175.235	208.217	0.248799	Up	0.844692	2862	EQB49972	gi|530468645|gb|EQB49972.1|	hypothetical protein CGLO_10640 [Colletotrichum gloeosporioides Cg-14]	--	--	--	--	GO:0016021 integral component of membrane
CGLO_00791	1915.14	1763.94	-0.118649	Down	0.923356	717	EQB58897	gi|530479768|gb|EQB58897.1|	hypothetical protein CGLO_00791 [Colletotrichum gloeosporioides Cg-14]	aor:AOR_1_3270174	AO090308000016; hypothetical protein; K20412 peptidase inhibitor 16	--	--	GO:0005576 extracellular region
CGLO_05445	1409.06	1359.66	-0.0514839	Down	0.966181	1974	EQB54686	gi|530474467|gb|EQB54686.1|	hypothetical protein CGLO_05445 [Colletotrichum gloeosporioides Cg-14]	--	--	GO:0055114 oxidation-reduction process | GO:0018188 peptidyl-proline di-hydroxylation | GO:0006449 regulation of translational termination | GO:0000288 nuclear-transcribed mRNA catabolic process, deadenylation-dependent decay	GO:0031543 peptidyl-proline dioxygenase activity | GO:0008143 poly(A) binding | GO:0031418 L-ascorbic acid binding | GO:0005506 iron ion binding	--
CGLO_02061	23.0371	31.2372	0.439309	Up	0.799408	465	EQB57762	gi|530478394|gb|EQB57762.1|	hypothetical protein CGLO_02061 [Colletotrichum gloeosporioides Cg-14]	tmn:UCRPA7_5650	putative phosphoprotein phosphatase-like protein; K18065 Cdc25 family phosphatase [EC:3.1.3.48 1.20.4.-]	GO:0016311 dephosphorylation	GO:0016791 phosphatase activity | GO:0004792 thiosulfate sulfurtransferase activity	--
CGLO_12404	10.1207	15.9655	0.657645	Up	0.719607	2712	EQB48382	gi|530466599|gb|EQB48382.1|	hypothetical protein CGLO_12404 [Colletotrichum gloeosporioides Cg-14]	pan:PODANSg5497	hypothetical protein; K15503 serine/threonine-protein phosphatase 6 regulatory ankyrin repeat subunit B	GO:0030001 metal ion transport | GO:0055085 transmembrane transport	GO:0046873 metal ion transmembrane transporter activity	GO:0016021 integral component of membrane
CGLO_02282	819.008	694.198	-0.238531	Down	0.795236	732	EQB57572	gi|530478161|gb|EQB57572.1|	clathrin light chain [Colletotrichum gloeosporioides Cg-14]	--	--	GO:0045807 positive regulation of endocytosis | GO:0006886 intracellular protein transport	GO:0005198 structural molecule activity	GO:0030132 clathrin coat of coated pit | GO:0030130 clathrin coat of trans-Golgi network vesicle
CGLO_17555	1444.05	1337.22	-0.110875	Down	0.902858	753	EQB43755	gi|530460429|gb|EQB43755.1|	O-methyltransferase [Colletotrichum gloeosporioides Cg-14]	--	--	GO:0032259 methylation	GO:0008171 O-methyltransferase activity	--
CGLO_12472	41.4953	33.4636	-0.310353	Down	0.867393	1221	EQB48307	gi|530466509|gb|EQB48307.1|	hypothetical protein CGLO_12472 [Colletotrichum gloeosporioides Cg-14]	--	--	--	--	GO:0016021 integral component of membrane | GO:0005783 endoplasmic reticulum
CGLO_08873	2185.53	2111.34	-0.0498263	Down	0.962382	2142	EQB51572	gi|530470632|gb|EQB51572.1|	hypothetical protein CGLO_08873 [Colletotrichum gloeosporioides Cg-14]	tdl:TDEL_0C01880	TDEL0C01880; hypothetical protein; K09245 transcriptional activator protein UGA3	GO:0006357 regulation of transcription from RNA polymerase II promoter	GO:0008270 zinc ion binding | GO:0000981 RNA polymerase II transcription factor activity, sequence-specific DNA binding | GO:0003677 DNA binding	GO:0005634 nucleus
CGLO_02892	1805.29	1987.06	0.138405	Up	0.92673	813	EQB57031	gi|530477491|gb|EQB57031.1|	hypothetical protein CGLO_02892 [Colletotrichum gloeosporioides Cg-14]	mtm:MYCTH_2315602	hypothetical protein; K02936 large subunit ribosomal protein L7Ae	GO:0042254 ribosome biogenesis	--	GO:0005840 ribosome
CGLO_07618	150.475	95.2505	-0.659723	Down	0.308065	564	EQB52732	gi|530472055|gb|EQB52732.1|	hypothetical protein CGLO_07618 [Colletotrichum gloeosporioides Cg-14]	--	--	--	GO:0008270 zinc ion binding	--
CGLO_16031	61.6395	15.5542	-1.98655	Down	0.00209497	867	EQB45132	gi|530462178|gb|EQB45132.1|	HPP family protein [Colletotrichum gloeosporioides Cg-14]	wic:J056_002527	putative actin-related protein 8; K11673 actin-related protein 8	--	--	GO:0016021 integral component of membrane
CGLO_07127	20.0897	52.3776	1.38249	Up	0.126219	738	EQB53183	gi|530472608|gb|EQB53183.1|	hypothetical protein CGLO_07127 [Colletotrichum gloeosporioides Cg-14]	--	--	--	--	--
CGLO_13598	5.37773	3.84587	-0.483688	Down	0.853363	1875	EQB47271	gi|530465097|gb|EQB47271.1|	dimethylaniline monooxygenase [Colletotrichum gloeosporioides Cg-14]	nhe:NECHADRAFT_29888	hypothetical protein; K00485 dimethylaniline monooxygenase (N-oxide forming) [EC:1.14.13.8]	GO:0055114 oxidation-reduction process	GO:0050660 flavin adenine dinucleotide binding | GO:0004499 N,N-dimethylaniline monooxygenase activity | GO:0050661 NADP binding	GO:0016021 integral component of membrane
CGLO_12251	315.28	296.36	-0.0892841	Down	0.938616	1164	EQB48513	gi|530466772|gb|EQB48513.1|	hypothetical protein CGLO_12251 [Colletotrichum gloeosporioides Cg-14]	nhe:NECHADRAFT_80386	hypothetical protein; K17413 small subunit ribosomal protein S35	GO:0032543 mitochondrial translation	GO:0003735 structural constituent of ribosome	GO:0005763 mitochondrial small ribosomal subunit
CGLO_08829	9.53501	6.60598	-0.529463	Down	0.813665	582	EQB51613	gi|530470683|gb|EQB51613.1|	Upc2 protein [Colletotrichum gloeosporioides Cg-14]	aor:AOR_1_316174	AO090005000169; hypothetical protein; K00681 gamma-glutamyltranspeptidase / glutathione hydrolase [EC:2.3.2.2 3.4.19.13]	GO:0006357 regulation of transcription from RNA polymerase II promoter	GO:0000981 RNA polymerase II transcription factor activity, sequence-specific DNA binding | GO:0008270 zinc ion binding	GO:0005634 nucleus
CGLO_03314	135.883	99.2304	-0.453513	Down	0.569866	1581	EQB56659	gi|530477032|gb|EQB56659.1|	hypothetical protein CGLO_03314 [Colletotrichum gloeosporioides Cg-14]	npa:UCRNP2_2720	putative benzoate 4-monooxygenase cytochrome p450 protein; K07824 benzoate 4-monooxygenase [EC:1.14.13.12]	GO:0055114 oxidation-reduction process	GO:0020037 heme binding | GO:0016705 oxidoreductase activity, acting on paired donors, with incorporation or reduction of molecular oxygen | GO:0004497 monooxygenase activity | GO:0005506 iron ion binding	GO:0016021 integral component of membrane
CGLO_14947	13.5016	28.991	1.10248	Up	0.251957	3444	EQB46077	gi|530463384|gb|EQB46077.1|	calcium-translocating P-type ATPase [Colletotrichum gloeosporioides Cg-14]	maw:MAC_05950	plasma membrane calcium-transporting ATPase 2; K01537 Ca2+-transporting ATPase [EC:3.6.3.8]	GO:0070588 calcium ion transmembrane transport | GO:0008152 metabolic process	GO:0005388 calcium-transporting ATPase activity | GO:0046872 metal ion binding | GO:0005524 ATP binding	GO:0016021 integral component of membrane
CGLO_15588	25.296	38.4911	0.605617	Up	0.529673	1479	EQB45519	gi|530462670|gb|EQB45519.1|	hypothetical protein CGLO_15588 [Colletotrichum gloeosporioides Cg-14]	--	--	GO:0071322 cellular response to carbohydrate stimulus | GO:0045944 positive regulation of transcription from RNA polymerase II promoter | GO:0060237 regulation of fungal-type cell wall organization	GO:0001077 transcriptional activator activity, RNA polymerase II core promoter proximal region sequence-specific binding | GO:0046872 metal ion binding | GO:0000978 RNA polymerase II core promoter proximal region sequence-specific DNA binding	GO:0005829 cytosol | GO:0005634 nucleus
CGLO_05047	417.835	326.563	-0.355575	Down	0.601117	6537	EQB55056	gi|530474894|gb|EQB55056.1|	hypothetical protein CGLO_05047 [Colletotrichum gloeosporioides Cg-14]	mbe:MBM_00260	polyketide synthase 1; K19791 iron transport multicopper oxidase	GO:0009058 biosynthetic process	GO:0016740 transferase activity | GO:0016788 hydrolase activity, acting on ester bonds	--
CGLO_05961	6.62425	4.85016	-0.449724	Down	0.863306	318	EQB54236	gi|530473902|gb|EQB54236.1|	hypothetical protein CGLO_05961 [Colletotrichum gloeosporioides Cg-14]	nhe:NECHADRAFT_37426	hypothetical protein; K14854 ribosome assembly protein 3	--	--	--
CGLO_12921	196.681	223.788	0.186274	Up	0.870032	1791	EQB47897	gi|530465956|gb|EQB47897.1|	hypothetical protein CGLO_12921 [Colletotrichum gloeosporioides Cg-14]	tve:TRV_02082	hypothetical protein; K01880 glycyl-tRNA synthetase [EC:6.1.1.14]	--	--	GO:0016021 integral component of membrane
CGLO_06312	16.0071	4.88232	-1.71308	Down	0.0398382	765	EQB53918	gi|530473494|gb|EQB53918.1|	hypothetical protein CGLO_06312 [Colletotrichum gloeosporioides Cg-14]	tve:TRV_01116	hypothetical protein; K01873 valyl-tRNA synthetase [EC:6.1.1.9]	--	--	--
CGLO_17664	476.709	409.813	-0.218143	Down	0.839249	1692	EQB43655	gi|530460297|gb|EQB43655.1|	zinc finger protein Yan [Colletotrichum gloeosporioides Cg-14]	vda:VDAG_05485	zinc finger protein; K14816 pre-60S factor REI1	--	GO:0008270 zinc ion binding | GO:0003676 nucleic acid binding	--
CGLO_07362	54.8884	50.568	-0.118278	Down	0.94343	657	EQB52974	gi|530472346|gb|EQB52974.1|	hypothetical protein CGLO_07362 [Colletotrichum gloeosporioides Cg-14]	--	--	--	--	--
CGLO_06613	1.4175	1.24087	-0.191988	Down	0.938818	315	EQB53654	gi|530473177|gb|EQB53654.1|	hypothetical protein CGLO_06613 [Colletotrichum gloeosporioides Cg-14]	--	--	--	--	--
CGLO_00758	8.1296	5.15358	-0.65761	Down	0.748267	1035	EQB58914	gi|530479791|gb|EQB58914.1|	proline racemase [Colletotrichum gloeosporioides Cg-14]	maw:MAC_07141	proline racemase, putative; K20406 nitrogen permease regulator 3-like protein	--	--	--
CGLO_03964	0.189351	0.175782	-0.107279	Down	0.94343	2082	EQB56063	gi|530476118|gb|EQB56063.1|	hypothetical protein CGLO_03964 [Colletotrichum gloeosporioides Cg-14]	afm:AFUA_5G11590	glycerophosphocholine phosphodiesterase Gde1; K18696 glycerophosphodiester phosphodiesterase [EC:3.1.4.46]	--	--	GO:0016021 integral component of membrane
CGLO_01280	33.62	30.6311	-0.134322	Down	0.94343	2124	EQB58473	gi|530479237|gb|EQB58473.1|	hypothetical protein CGLO_01280 [Colletotrichum gloeosporioides Cg-14]	val:VDBG_03578	GRC3; K06947 polynucleotide 5'-hydroxyl-kinase GRC3/NOL9 [EC:2.7.1.-]	GO:0006363 termination of RNA polymerase I transcription | GO:0016310 phosphorylation | GO:0000448 cleavage in ITS2 between 5.8S rRNA and LSU-rRNA of tricistronic rRNA transcript (SSU-rRNA, 5.8S rRNA, LSU-rRNA)	GO:0051731 polynucleotide 5'-hydroxyl-kinase activity	GO:0030874 nucleolar chromatin
CGLO_10611	41.9087	89.5107	1.09481	Up	0.143913	1254	EQB49999	gi|530468680|gb|EQB49999.1|	hypothetical protein CGLO_10611 [Colletotrichum gloeosporioides Cg-14]	--	--	GO:0005975 carbohydrate metabolic process	GO:0030246 carbohydrate binding	--
CGLO_16221	100.52	96.7623	-0.0549641	Down	0.966181	900	EQB44973	gi|530461981|gb|EQB44973.1|	plant Basic Secretory protein [Colletotrichum gloeosporioides Cg-14]	--	--	--	--	--
CGLO_00798	499.206	366.811	-0.444597	Down	0.598631	2475	EQB58889	gi|530479755|gb|EQB58889.1|	hypothetical protein CGLO_00798 [Colletotrichum gloeosporioides Cg-14]	--	--	--	--	--
CGLO_13599	3.55982	3.01923	-0.237624	Down	0.938714	1815	EQB47272	gi|530465098|gb|EQB47272.1|	phosphate transporter [Colletotrichum gloeosporioides Cg-14]	npa:UCRNP2_4411	putative sodium phosphate protein; K14640 solute carrier family 20 (sodium-dependent phosphate transporter)	GO:0006817 phosphate ion transport | GO:0055085 transmembrane transport	GO:0005315 inorganic phosphate transmembrane transporter activity	GO:0016021 integral component of membrane
CGLO_03435	10.9909	11.5262	0.0686025	Up	0.971223	924	EQB56550	gi|530476689|gb|EQB56550.1|	hypothetical protein CGLO_03435 [Colletotrichum gloeosporioides Cg-14]	--	--	--	--	--
CGLO_14181	20.1731	26.3486	0.385293	Up	0.853363	1251	EQB46738	gi|530464312|gb|EQB46738.1|	cellulase [Colletotrichum gloeosporioides Cg-14]	maw:MAC_08328	cellulase family protein; K01179 endoglucanase [EC:3.2.1.4]	GO:0005975 carbohydrate metabolic process	GO:0004553 hydrolase activity, hydrolyzing O-glycosyl compounds	--
CGLO_08325	1044.99	1150.76	0.139092	Up	0.853363	2760	EQB52067	gi|530471245|gb|EQB52067.1|	dynamin family protein [Colletotrichum gloeosporioides Cg-14]	gtr:GLOTRDRAFT_115554	hypothetical protein; K17065 dynamin 1-like protein [EC:3.6.5.5]	GO:0000001 mitochondrion inheritance | GO:0008053 mitochondrial fusion | GO:0007006 mitochondrial membrane organization | GO:0000002 mitochondrial genome maintenance | GO:0008152 metabolic process	GO:0003924 GTPase activity | GO:0005525 GTP binding	GO:0030061 mitochondrial crista | GO:0031304 intrinsic component of mitochondrial inner membrane | GO:0005758 mitochondrial intermembrane space | GO:0097002 mitochondrial inner boundary membrane | GO:0031314 extrinsic component of mitochondrial inner membrane
CGLO_12422	61.0473	86.1426	0.496801	Up	0.454095	2742	EQB48350	gi|530466564|gb|EQB48350.1|	3'-5' exonuclease [Colletotrichum gloeosporioides Cg-14]	nhe:NECHADRAFT_92603	hypothetical protein; K12591 exosome complex exonuclease RRP6 [EC:3.1.13.-]	GO:0034473 U1 snRNA 3'-end processing | GO:0071039 nuclear polyadenylation-dependent CUT catabolic process | GO:0000973 posttranscriptional tethering of RNA polymerase II gene DNA at nuclear periphery | GO:0071042 nuclear polyadenylation-dependent mRNA catabolic process | GO:0071051 polyadenylation-dependent snoRNA 3'-end processing | GO:0071038 nuclear polyadenylation-dependent tRNA catabolic pr…	GO:0000166 nucleotide binding | GO:0003676 nucleic acid binding | GO:0000175 3'-5'-exoribonuclease activity	GO:0000176 nuclear exosome (RNase complex) | GO:0005730 nucleolus
CGLO_03809	96.1967	112.634	0.22758	Up	0.841758	3858	EQB56193	gi|530476267|gb|EQB56193.1|	PHD-finger domain-containing protein [Colletotrichum gloeosporioides Cg-14]	pfj:MYCFIDRAFT_206519	hypothetical protein; K15339 holliday junction resolvase YEN1 [EC:3.1.-.-]	GO:0090305 nucleic acid phosphodiester bond hydrolysis | GO:0006281 DNA repair	GO:0003677 DNA binding | GO:0004518 nuclease activity | GO:0008270 zinc ion binding	--
CGLO_15687	401.106	452.699	0.174571	Up	0.853732	2580	EQB45440	gi|530462571|gb|EQB45440.1|	hypothetical protein CGLO_15687 [Colletotrichum gloeosporioides Cg-14]	--	--	--	--	GO:0016021 integral component of membrane
CGLO_14088	1.88743	2.47507	0.391044	Up	0.893752	1149	EQB46841	gi|530464457|gb|EQB46841.1|	major facilitator superfamily transporter [Colletotrichum gloeosporioides Cg-14]	mbe:MBM_09972	hsp90-like protein; K11231 osomolarity two-component system, sensor histidine kinase SLN1 [EC:2.7.13.3]	GO:0055085 transmembrane transport	--	GO:0016021 integral component of membrane
CGLO_14611	10.1586	8.79068	-0.20865	Down	0.938616	792	EQB46346	gi|530463771|gb|EQB46346.1|	hypothetical protein CGLO_14611 [Colletotrichum gloeosporioides Cg-14]	--	--	--	--	--
CGLO_03680	4.85035	3.63045	-0.417938	Down	0.884462	1692	EQB56328	gi|530476427|gb|EQB56328.1|	hypothetical protein CGLO_03680 [Colletotrichum gloeosporioides Cg-14]	cput:CONPUDRAFT_145475	alpha beta-hydrolase; K02332 DNA polymerase gamma 1 [EC:2.7.7.7]	GO:0008152 metabolic process	GO:0016787 hydrolase activity	--
CGLO_02354	154.27	124.52	-0.309087	Down	0.696007	1038	EQB57510	gi|530478084|gb|EQB57510.1|	hypothetical protein CGLO_02354 [Colletotrichum gloeosporioides Cg-14]	nhe:NECHADRAFT_60967	hypothetical protein; K01046 triacylglycerol lipase [EC:3.1.1.3]	GO:0006505 GPI anchor metabolic process | GO:0006886 intracellular protein transport | GO:0019433 triglyceride catabolic process	GO:0004806 triglyceride lipase activity	GO:0005739 mitochondrion
CGLO_04865	935.325	991.568	0.0842429	Up	0.955668	1239	EQB55231	gi|530475104|gb|EQB55231.1|	hypothetical protein CGLO_04865 [Colletotrichum gloeosporioides Cg-14]	vda:VDAG_10449	argininosuccinate synthase; K01940 argininosuccinate synthase [EC:6.3.4.5]	GO:0006526 arginine biosynthetic process	GO:0005524 ATP binding | GO:0004055 argininosuccinate synthase activity	--
CGLO_15944	256.34	280.351	0.129174	Up	0.92419	1119	EQB45216	gi|530462278|gb|EQB45216.1|	hypothetical protein CGLO_15944 [Colletotrichum gloeosporioides Cg-14]	ure:UREG_07339	hypothetical protein; K20295 conserved oligomeric Golgi complex subunit 8	--	--	--
CGLO_14124	1093.11	1052.53	-0.0545762	Down	0.966181	870	EQB46811	gi|530464408|gb|EQB46811.1|	hypothetical protein CGLO_14124 [Colletotrichum gloeosporioides Cg-14]	--	--	--	--	GO:0016021 integral component of membrane
CGLO_07092	2.65161	1.9005	-0.480494	Down	0.848145	2052	EQB53212	gi|530472643|gb|EQB53212.1|	hypothetical protein CGLO_07092 [Colletotrichum gloeosporioides Cg-14]	--	--	--	--	--
CGLO_04625	8.65247	10.2797	0.248608	Up	0.938616	531	EQB55444	gi|530475364|gb|EQB55444.1|	hypothetical protein CGLO_04625 [Colletotrichum gloeosporioides Cg-14]	val:VDBG_02269	hypothetical protein; K14526 ribonuclease P/MRP protein subunit POP7 [EC:3.1.26.5]	GO:0090502 RNA phosphodiester bond hydrolysis, endonucleolytic | GO:0008033 tRNA processing	GO:0004526 ribonuclease P activity	GO:0005634 nucleus
CGLO_16377	78.1025	121.643	0.639208	Up	0.32177	2748	EQB44829	gi|530461799|gb|EQB44829.1|	phosphatidylinositol 3 [Colletotrichum gloeosporioides Cg-14]	vda:VDAG_01875	phosphatidylinositol 3-kinase catalytic subunit; K00914 phosphatidylinositol 3-kinase [EC:2.7.1.137]	GO:0036092 phosphatidylinositol-3-phosphate biosynthetic process | GO:0032968 positive regulation of transcription elongation from RNA polymerase II promoter | GO:0006468 protein phosphorylation | GO:0048015 phosphatidylinositol-mediated signaling | GO:0030242 pexophagy | GO:0046854 phosphatidylinositol phosphorylation	GO:0016303 1-phosphatidylinositol-3-kinase activity | GO:0004672 protein kinase activity	GO:0000329 fungal-type vacuole membrane | GO:0071561 nucleus-vacuole junction | GO:0005777 peroxisome | GO:0000407 pre-autophagosomal structure | GO:0034271 phosphatidylinositol 3-kinase complex, class III, type I | GO:0005768 endosome | GO:0034272 phosphatidylinositol 3-kinase complex, class III, type II
CGLO_00808	22.1624	19.7141	-0.168886	Down	0.939882	264	EQB58879	gi|530479744|gb|EQB58879.1|	hypothetical protein CGLO_00808 [Colletotrichum gloeosporioides Cg-14]	smp:SMAC_03088	hypothetical protein; K06013 STE24 endopeptidase [EC:3.4.24.84]	--	--	--
CGLO_13304	361.052	218.199	-0.726561	Down	0.236754	1062	EQB47527	gi|530465469|gb|EQB47527.1|	hypothetical protein CGLO_13304 [Colletotrichum gloeosporioides Cg-14]	--	--	--	--	--
CGLO_05534	64.0576	121.358	0.921823	Up	0.26808	882	EQB54616	gi|530474375|gb|EQB54616.1|	DJ-1/PfpI family protein [Colletotrichum gloeosporioides Cg-14]	--	--	GO:0008152 metabolic process | GO:0042026 protein refolding	GO:0016829 lyase activity	--
CGLO_03947	9.28173	4.53758	-1.03247	Down	0.433843	1023	EQB56046	gi|530476101|gb|EQB56046.1|	hypothetical protein CGLO_03947 [Colletotrichum gloeosporioides Cg-14]	--	--	GO:0055085 transmembrane transport	GO:0005215 transporter activity	GO:0016021 integral component of membrane
CGLO_01475	14.69	15.5225	0.0795247	Up	0.966181	1569	EQB58301	gi|530479039|gb|EQB58301.1|	FAD binding domain-containing protein [Colletotrichum gloeosporioides Cg-14]	pbn:PADG_12043	PADG_06140, PADG_06141; cysteine desulfurase, mitochondrial; K04487 cysteine desulfurase [EC:2.8.1.7]	GO:0055114 oxidation-reduction process	GO:0050660 flavin adenine dinucleotide binding | GO:0016614 oxidoreductase activity, acting on CH-OH group of donors	--
CGLO_03328	855.661	482.185	-0.827452	Down	0.150155	1452	EQB56646	gi|530477016|gb|EQB56646.1|	calcium/proton exchanger [Colletotrichum gloeosporioides Cg-14]	maw:MAC_02632	calcium/proton exchanger; K07300 Ca2+:H+ antiporter	GO:0070588 calcium ion transmembrane transport | GO:0071805 potassium ion transmembrane transport	GO:0015386 potassium:proton antiporter activity | GO:0015369 calcium:proton antiporter activity	GO:0016021 integral component of membrane | GO:0000324 fungal-type vacuole
CGLO_09495	657.646	394.088	-0.738794	Down	0.00926116	1683	EQB51009	gi|530469951|gb|EQB51009.1|	C2H2 transcription factor [Colletotrichum gloeosporioides Cg-14]	--	--	--	GO:0003676 nucleic acid binding	--
CGLO_11080	115.506	120.768	0.0642685	Up	0.966181	1605	EQB49572	gi|530468130|gb|EQB49572.1|	hypothetical protein CGLO_11080 [Colletotrichum gloeosporioides Cg-14]	--	--	GO:0006357 regulation of transcription from RNA polymerase II promoter	GO:0000981 RNA polymerase II transcription factor activity, sequence-specific DNA binding | GO:0008270 zinc ion binding	GO:0005634 nucleus
CGLO_07403	1.21166	1.10008	-0.139375	Down	0.954939	1647	EQB52933	gi|530472297|gb|EQB52933.1|	hypothetical protein CGLO_07403 [Colletotrichum gloeosporioides Cg-14]	--	--	--	--	--
CGLO_14204	1.43156	1.76633	0.303162	Up	0.913642	1482	EQB46728	gi|530464298|gb|EQB46728.1|	succinate-semialdehyde dehydrogenase [Colletotrichum gloeosporioides Cg-14]	aje:HCAG_06245	succinate-semialdehyde dehydrogenase; K00135 succinate-semialdehyde dehydrogenase / glutarate-semialdehyde dehydrogenase [EC:1.2.1.16 1.2.1.79 1.2.1.20]	GO:0009450 gamma-aminobutyric acid catabolic process | GO:0055114 oxidation-reduction process	GO:0009013 succinate-semialdehyde dehydrogenase [NAD(P)+] activity	--
CGLO_13990	10.4227	39.159	1.90962	Up	0.000923687	1188	EQB46931	gi|530464589|gb|EQB46931.1|	beta-lactamase [Colletotrichum gloeosporioides Cg-14]	ela:UCREL1_3838	putative myo-inositol transporter protein; K08150 MFS transporter, SP family, solute carrier family 2 (myo-inositol transporter), member 13	--	--	GO:0016020 membrane
CGLO_09417	36.0771	44.6853	0.308716	Up	0.893712	2058	EQB51082	gi|530470037|gb|EQB51082.1|	hypothetical protein CGLO_09417 [Colletotrichum gloeosporioides Cg-14]	--	--	--	--	--
CGLO_03838	87.6119	79.3784	-0.142379	Down	0.917223	2199	EQB56172	gi|530476243|gb|EQB56172.1|	Brf1-like TBP-binding domain-containing protein [Colletotrichum gloeosporioides Cg-14]	maj:MAA_09466	Transcription factor TFIIB; K15196 transcription factor IIIB 90 kDa subunit	GO:0070898 RNA polymerase III transcriptional preinitiation complex assembly | GO:0090074 negative regulation of protein homodimerization activity | GO:0006359 regulation of transcription from RNA polymerase III promoter | GO:0001112 DNA-templated transcriptional open complex formation | GO:0070893 transposon integration	GO:0017025 TBP-class protein binding | GO:0008270 zinc ion binding | GO:0001156 TFIIIC-class transcription factor binding | GO:0003677 DNA binding | GO:0000994 RNA polymerase III core binding | GO:0001026 TFIIIB-type transcription factor activity	GO:0000126 transcription factor TFIIIB complex
CGLO_10055	14.5946	15.5701	0.0933392	Up	0.966181	1521	EQB50498	gi|530469319|gb|EQB50498.1|	integral membrane protein [Colletotrichum gloeosporioides Cg-14]	wic:J056_000129	mRNA cap guanine-N7 methyltransferase; K00565 mRNA (guanine-N7-)-methyltransferase [EC:2.1.1.56]	--	--	GO:0016021 integral component of membrane
CGLO_05922	15.8455	25.2408	0.671684	Up	0.569866	969	EQB54264	gi|530473937|gb|EQB54264.1|	hypothetical protein CGLO_05922 [Colletotrichum gloeosporioides Cg-14]	tmn:UCRPA7_4214	putative aspartate aminotransferase protein; K14455 aspartate aminotransferase, mitochondrial [EC:2.6.1.1]	--	--	--
CGLO_04398	51.1364	57.3444	0.165303	Up	0.920714	561	EQB55652	gi|530475617|gb|EQB55652.1|	CSL zinc finger [Colletotrichum gloeosporioides Cg-14]	fpu:FPSE_11818	hypothetical protein; K17867 diphthamide biosynthesis protein 4	GO:0017183 peptidyl-diphthamide biosynthetic process from peptidyl-histidine	GO:0008198 ferrous iron binding	--
CGLO_00264	96.7225	62.2811	-0.635058	Down	0.530599	2022	EQB59360	gi|530480342|gb|EQB59360.1|	hypothetical protein CGLO_00264 [Colletotrichum gloeosporioides Cg-14]	wse:WALSEDRAFT_66770	hypothetical protein; K20715 phototropin [EC:2.7.11.1]	GO:0000160 phosphorelay signal transduction system | GO:0023014 signal transduction by protein phosphorylation	GO:0000155 phosphorelay sensor kinase activity	GO:0005622 intracellular
CGLO_09216	3.005	6.81939	1.18228	Up	0.33295	1485	EQB51269	gi|530470264|gb|EQB51269.1|	hypothetical protein CGLO_09216 [Colletotrichum gloeosporioides Cg-14]	abe:ARB_01305	hypothetical protein; K09244 transcriptional regulatory protein AMDR	GO:0006351 transcription, DNA-templated	GO:0003677 DNA binding | GO:0008270 zinc ion binding	GO:0005634 nucleus
CGLO_15258	824.768	828.192	0.00597797	Up	0.992587	1494	EQB45819	gi|530463039|gb|EQB45819.1|	ATP synthase F0 [Colletotrichum gloeosporioides Cg-14]	npa:UCRNP2_7395	putative peptidyl-prolyl cis-trans isomerase protein; K05864 peptidyl-prolyl isomerase D [EC:5.2.1.8]	GO:0055085 transmembrane transport	--	GO:0016021 integral component of membrane
CGLO_12905	235.118	71.7281	-1.71277	Down	0.000958125	489	EQB47906	gi|530465967|gb|EQB47906.1|	hypothetical protein CGLO_12905 [Colletotrichum gloeosporioides Cg-14]	--	--	--	--	--
CGLO_02966	19.1691	16.9056	-0.181282	Down	0.94343	1794	EQB56965	gi|530477402|gb|EQB56965.1|	hypothetical protein CGLO_02966 [Colletotrichum gloeosporioides Cg-14]	--	--	--	--	GO:0016021 integral component of membrane
CGLO_10110	218.232	323.783	0.569163	Up	0.701111	3111	EQB50454	gi|530469263|gb|EQB50454.1|	potassium/sodium efflux P-type ATPase [Colletotrichum gloeosporioides Cg-14]	afm:AFUA_2G01320	potassium/sodium P-type ATPase; K01536 Na+-exporting ATPase [EC:3.6.3.7]	GO:0098655 cation transmembrane transport | GO:0008152 metabolic process	GO:0046872 metal ion binding | GO:0005524 ATP binding | GO:0019829 cation-transporting ATPase activity	GO:0016021 integral component of membrane
CGLO_05903	58.2293	49.9209	-0.222101	Down	0.920329	957	EQB54279	gi|530473955|gb|EQB54279.1|	hypothetical protein CGLO_05903 [Colletotrichum gloeosporioides Cg-14]	--	--	--	--	GO:0016021 integral component of membrane
CGLO_08761	0.568603	0.523043	-0.12049	Down	0.94343	1110	EQB51677	gi|530470767|gb|EQB51677.1|	hypothetical protein CGLO_08761 [Colletotrichum gloeosporioides Cg-14]	pic:PICST_51972	GBD1; flavonol synthase; K04125 gibberellin 2-oxidase [EC:1.14.11.13]	GO:0055114 oxidation-reduction process	GO:0016491 oxidoreductase activity | GO:0005506 iron ion binding	--
CGLO_00660	770.147	752.365	-0.0337014	Down	0.968269	2439	EQB59013	gi|530479911|gb|EQB59013.1|	dynamin central region [Colletotrichum gloeosporioides Cg-14]	val:VDBG_05841	dynamin-A; K17065 dynamin 1-like protein [EC:3.6.5.5]	GO:0000001 mitochondrion inheritance | GO:0016559 peroxisome fission | GO:0051260 protein homooligomerization | GO:0001300 chronological cell aging | GO:0034643 establishment of mitochondrion localization, microtubule-mediated | GO:0090149 mitochondrial membrane fission | GO:0008152 metabolic process	GO:0003924 GTPase activity | GO:0042803 protein homodimerization activity | GO:0005525 GTP binding	GO:0032153 cell division site | GO:0005777 peroxisome | GO:0005741 mitochondrial outer membrane
CGLO_14434	45.3514	28.4419	-0.673127	Down	0.646945	942	EQB46522	gi|530464017|gb|EQB46522.1|	hypothetical protein CGLO_14434 [Colletotrichum gloeosporioides Cg-14]	--	--	--	--	--
CGLO_12443	87.7174	137.255	0.645927	Up	0.189529	348	EQB48333	gi|530466544|gb|EQB48333.1|	hypothetical protein CGLO_12443 [Colletotrichum gloeosporioides Cg-14]	--	--	GO:0031505 fungal-type cell wall organization	--	--
CGLO_09002	0.417199	0.483195	0.211869	Up	0.902858	1068	EQB51454	gi|530470486|gb|EQB51454.1|	methyltransferase domain-containing protein [Colletotrichum gloeosporioides Cg-14]	ure:UREG_00738	hypothetical protein; K12584 m7GpppX diphosphatase [EC:3.6.1.59]	GO:0032259 methylation	GO:0008168 methyltransferase activity	--
CGLO_06912	1.29057	1.80115	0.480905	Up	0.837682	450	EQB53383	gi|530472855|gb|EQB53383.1|	hypothetical protein CGLO_06912 [Colletotrichum gloeosporioides Cg-14]	--	--	--	--	--
CGLO_04839	10.7286	16.0146	0.577919	Up	0.75004	744	EQB55251	gi|530475129|gb|EQB55251.1|	acetyltransferase [Colletotrichum gloeosporioides Cg-14]	vda:VDAG_01148	hypothetical protein; K20794 N-alpha-acetyltransferase 40 [EC:2.3.1.257]	GO:0017196 N-terminal peptidyl-methionine acetylation	GO:0008080 N-acetyltransferase activity	GO:0032153 cell division site | GO:0005829 cytosol
CGLO_15865	59.7779	49.5471	-0.27081	Down	0.853363	1443	EQB45277	gi|530462360|gb|EQB45277.1|	hypothetical protein CGLO_15865 [Colletotrichum gloeosporioides Cg-14]	--	--	GO:0055114 oxidation-reduction process	GO:0004497 monooxygenase activity	GO:0016021 integral component of membrane
CGLO_00930	4.92582	9.39342	0.931288	Up	0.513409	2823	EQB58782	gi|530479631|gb|EQB58782.1|	heterokaryon incompatibility protein [Colletotrichum gloeosporioides Cg-14]	pte:PTT_08985	hypothetical protein; K01230 mannosyl-oligosaccharide alpha-1,2-mannosidase [EC:3.2.1.113]	--	--	--
CGLO_11699	48.4445	42.2049	-0.198924	Down	0.906255	579	EQB49008	gi|530467411|gb|EQB49008.1|	glutaredoxin [Colletotrichum gloeosporioides Cg-14]	--	--	GO:0045454 cell redox homeostasis | GO:0055114 oxidation-reduction process	GO:0009055 electron carrier activity | GO:0015038 glutathione disulfide oxidoreductase activity | GO:0015035 protein disulfide oxidoreductase activity	GO:0031965 nuclear membrane | GO:0005794 Golgi apparatus | GO:0042175 nuclear outer membrane-endoplasmic reticulum membrane network | GO:0016021 integral component of membrane | GO:0005783 endoplasmic reticulum
CGLO_13579	440.681	322.011	-0.452626	Down	0.493255	1053	EQB47294	gi|530465130|gb|EQB47294.1|	branched-chain amino acid aminotransferase [Colletotrichum gloeosporioides Cg-14]	ncr:NCU00792	branched-chain-amino-acid aminotransferase; K00826 branched-chain amino acid aminotransferase [EC:2.6.1.42]	GO:0009081 branched-chain amino acid metabolic process	GO:0004084 branched-chain-amino-acid transaminase activity	--
CGLO_10543	42.5674	58.9484	0.469703	Up	0.626048	1569	EQB50046	gi|530468743|gb|EQB50046.1|	hypothetical protein CGLO_10543 [Colletotrichum gloeosporioides Cg-14]	maj:MAA_07739	glycoside hydrolase family 16; K03380 phenol 2-monooxygenase [EC:1.14.13.7]	GO:0006351 transcription, DNA-templated	GO:0003677 DNA binding | GO:0008270 zinc ion binding	GO:0016021 integral component of membrane | GO:0005634 nucleus
CGLO_03225	2002.31	1484.18	-0.432002	Down	0.293313	2106	EQB56768	gi|530477155|gb|EQB56768.1|	transcription factor TFIIB [Colletotrichum gloeosporioides Cg-14]	val:VDBG_06375	transcription initiation factor IIB; K03124 transcription initiation factor TFIIB	GO:2000679 positive regulation of transcription regulatory region DNA binding | GO:0006355 regulation of transcription, DNA-templated | GO:0001113 transcriptional open complex formation at RNA polymerase II promoter | GO:0051123 RNA polymerase II transcriptional preinitiation complex assembly | GO:0001174 transcriptional start site selection at RNA polymerase II promoter	GO:0017025 TBP-class protein binding | GO:0008270 zinc ion binding | GO:0000993 RNA polymerase II core binding | GO:0001129 RNA polymerase II transcription factor activity, TBP-class protein binding, involved in preinitiation complex assembly | GO:0001139 transcription factor activity, core RNA polymerase II recruiting	GO:0016021 integral component of membrane | GO:0097550 transcriptional preinitiation complex | GO:0005634 nucleus
CGLO_01016	4.47326	3.24773	-0.461894	Down	0.857668	858	EQB58703	gi|530479529|gb|EQB58703.1|	hypothetical protein CGLO_01016 [Colletotrichum gloeosporioides Cg-14]	--	--	--	--	GO:0016021 integral component of membrane
CGLO_09758	1675.26	983.801	-0.767944	Down	0.520729	1002	EQB50767	gi|530469656|gb|EQB50767.1|	hypothetical protein CGLO_09758 [Colletotrichum gloeosporioides Cg-14]	--	--	--	--	--
CGLO_11100	0.142609	0.147938	0.0529239	Up	0.966181	1305	EQB49550	gi|530468107|gb|EQB49550.1|	hypothetical protein CGLO_11100 [Colletotrichum gloeosporioides Cg-14]	--	--	--	--	--
CGLO_00172	1.33461	1.08908	-0.293316	Down	0.902858	1410	EQB59448	gi|530480456|gb|EQB59448.1|	kelch repeat protein [Colletotrichum gloeosporioides Cg-14]	--	--	--	--	GO:0016021 integral component of membrane
CGLO_05546	1.68812	1.32323	-0.351355	Down	0.898156	1161	EQB54596	gi|530474352|gb|EQB54596.1|	hypothetical protein CGLO_05546 [Colletotrichum gloeosporioides Cg-14]	--	--	--	--	--
CGLO_07821	0.594491	0.671036	0.174736	Up	0.938616	1854	EQB52549	gi|530471826|gb|EQB52549.1|	HET domain-containing protein [Colletotrichum gloeosporioides Cg-14]	afv:AFLA_005130	L-lysine 2,3-aminomutase, putative; K01843 lysine 2,3-aminomutase [EC:5.4.3.2]	--	--	--
CGLO_00338	1.90921	3.11656	0.706978	Up	0.710527	303	EQB59297	gi|530480260|gb|EQB59297.1|	hypothetical protein CGLO_00338 [Colletotrichum gloeosporioides Cg-14]	--	--	--	--	--
CGLO_00300	0.833272	0.844582	0.0194499	Up	0.985853	3858	EQB59334	gi|530480305|gb|EQB59334.1|	hypothetical protein CGLO_00300 [Colletotrichum gloeosporioides Cg-14]	ppa:PAS_chr2-1_0829	hypothetical protein; K20032 palmitoyltransferase ZDHHC13/17 [EC:2.3.1.225]	GO:0030001 metal ion transport | GO:0055085 transmembrane transport	GO:0046873 metal ion transmembrane transporter activity	GO:0016021 integral component of membrane
CGLO_11185	3.288	2.7919	-0.235963	Down	0.938616	402	EQB49480	gi|530468016|gb|EQB49480.1|	OB-fold nucleic acid binding domain-containing protein [Colletotrichum gloeosporioides Cg-14]	maj:MAA_02172	glycoside hydrolase family 81 protein; K01180 endo-1,3(4)-beta-glucanase [EC:3.2.1.6]	--	--	--
CGLO_04127	26.7726	41.7324	0.640413	Up	0.562275	642	EQB55899	gi|530475915|gb|EQB55899.1|	hypothetical protein CGLO_04127 [Colletotrichum gloeosporioides Cg-14]	--	--	--	--	GO:0016020 membrane
CGLO_11204	9.77639	4.37604	-1.15968	Down	0.301734	1710	EQB49466	gi|530467996|gb|EQB49466.1|	hypothetical protein CGLO_11204 [Colletotrichum gloeosporioides Cg-14]	cim:CIMG_04862	cytochrome P450 monooxygenase; K17475 tryprostatin B 6-hydroxylase [EC:1.14.13.176]	GO:0055114 oxidation-reduction process	GO:0020037 heme binding | GO:0016705 oxidoreductase activity, acting on paired donors, with incorporation or reduction of molecular oxygen | GO:0004497 monooxygenase activity | GO:0005506 iron ion binding	GO:0016021 integral component of membrane
CGLO_03334	24.4041	30.5418	0.323658	Up	0.853363	1890	EQB56644	gi|530477013|gb|EQB56644.1|	flavodoxin [Colletotrichum gloeosporioides Cg-14]	pcs:Pc21g13280	Pc21g13280; K00327 NADPH-ferrihemoprotein reductase [EC:1.6.2.4]	GO:0016226 iron-sulfur cluster assembly | GO:0006809 nitric oxide biosynthetic process | GO:0055114 oxidation-reduction process	GO:0050660 flavin adenine dinucleotide binding | GO:0050661 NADP binding | GO:0003958 NADPH-hemoprotein reductase activity | GO:0005506 iron ion binding | GO:0010181 FMN binding	GO:0005739 mitochondrion
CGLO_03176	59.5706	12.9368	-2.20312	Down	0.00355405	357	EQB56792	gi|530477185|gb|EQB56792.1|	hypothetical protein CGLO_03176 [Colletotrichum gloeosporioides Cg-14]	--	--	--	--	--
CGLO_17442	416.142	307.232	-0.437748	Down	0.342725	1086	EQB43856	gi|530460555|gb|EQB43856.1|	triose-phosphate transporter [Colletotrichum gloeosporioides Cg-14]	--	--	--	--	GO:0016021 integral component of membrane
CGLO_01585	344.908	286.025	-0.270073	Down	0.864768	1791	EQB58191	gi|530478907|gb|EQB58191.1|	meiotically up-regulated 65 protein [Colletotrichum gloeosporioides Cg-14]	--	--	--	--	--
CGLO_14307	5.05386	5.04128	-0.00359777	Down	0.997693	594	EQB46629	gi|530464172|gb|EQB46629.1|	hypothetical protein CGLO_14307 [Colletotrichum gloeosporioides Cg-14]	--	--	--	--	--
CGLO_11430	4277.45	3712.7	-0.204284	Down	0.776698	1125	EQB49247	gi|530467726|gb|EQB49247.1|	hypothetical protein CGLO_11430 [Colletotrichum gloeosporioides Cg-14]	--	--	--	--	GO:0016021 integral component of membrane
CGLO_04614	0.81166	0.833376	0.0380923	Up	0.979526	864	EQB55463	gi|530475386|gb|EQB55463.1|	hypothetical protein CGLO_04614 [Colletotrichum gloeosporioides Cg-14]	--	--	--	--	--
CGLO_13288	290.674	211.142	-0.46119	Down	0.489163	432	EQB47550	gi|530465503|gb|EQB47550.1|	endoribonuclease L-PSP [Colletotrichum gloeosporioides Cg-14]	--	--	--	--	--
CGLO_08595	61.7753	21.1705	-1.54498	Down	0.00988438	1374	EQB51835	gi|530470954|gb|EQB51835.1|	hypothetical protein CGLO_08595 [Colletotrichum gloeosporioides Cg-14]	vda:VDAG_07139	hypothetical protein; K19787 carnosine N-methyltransferase [EC:2.1.1.22]	--	--	--
CGLO_05948	0.142609	0.147938	0.0529239	Up	0.966181	525	EQB54243	gi|530473911|gb|EQB54243.1|	beta-ketoacyl synthase domain-containing protein [Colletotrichum gloeosporioides Cg-14]	--	--	GO:0055114 oxidation-reduction process	GO:0016491 oxidoreductase activity | GO:0008270 zinc ion binding | GO:0016740 transferase activity	--
CGLO_16584	50.7294	87.8723	0.792587	Up	0.144723	1533	EQB44646	gi|530461563|gb|EQB44646.1|	F-box domain-containing protein [Colletotrichum gloeosporioides Cg-14]	vda:VDAG_00949	F-box protein pof7; K10295 F-box protein 9	GO:0071406 cellular response to methylmercury | GO:0031146 SCF-dependent proteasomal ubiquitin-dependent protein catabolic process	--	GO:0005829 cytosol | GO:0019005 SCF ubiquitin ligase complex
CGLO_13920	424.425	338.906	-0.324626	Down	0.680881	1806	EQB46990	gi|530464682|gb|EQB46990.1|	hypothetical protein CGLO_13920 [Colletotrichum gloeosporioides Cg-14]	vda:VDAG_06090	WD repeat-containing protein slp1; K03363 cell division cycle 20, cofactor of APC complex	GO:0008054 negative regulation of cyclin-dependent protein serine/threonine kinase by cyclin degradation | GO:0040020 regulation of meiotic nuclear division | GO:0051487 activation of anaphase-promoting complex activity involved in meiotic cell cycle | GO:0007092 activation of APC-Cdc20 complex activity | GO:0007094 mitotic spindle assembly checkpoint	GO:0097027 ubiquitin-protein transferase activator activity | GO:0010997 anaphase-promoting complex binding	GO:0005680 anaphase-promoting complex | GO:0033597 mitotic checkpoint complex
CGLO_07916	0.409269	0.470042	0.199739	Up	0.902858	528	EQB52450	gi|530471708|gb|EQB52450.1|	hypothetical protein CGLO_07916 [Colletotrichum gloeosporioides Cg-14]	--	--	GO:0008152 metabolic process	GO:0016407 acetyltransferase activity	--
CGLO_11923	12.196	13.6057	0.157799	Up	0.955668	999	EQB48807	gi|530467131|gb|EQB48807.1|	hypothetical protein CGLO_11923 [Colletotrichum gloeosporioides Cg-14]	nhe:NECHADRAFT_70010	hypothetical protein; K18327 RNA exonuclease 4 [EC:3.1.-.-]	GO:0090305 nucleic acid phosphodiester bond hydrolysis | GO:0006364 rRNA processing | GO:0000027 ribosomal large subunit assembly	GO:0004527 exonuclease activity | GO:0003676 nucleic acid binding	--
CGLO_01656	65.3381	65.9243	0.0128864	Up	0.988188	840	EQB58135	gi|530478838|gb|EQB58135.1|	hypothetical protein CGLO_01656 [Colletotrichum gloeosporioides Cg-14]	--	--	--	--	--
CGLO_05551	66.2011	77.1991	0.221729	Up	0.88947	3654	EQB54589	gi|530474343|gb|EQB54589.1|	hypothetical protein CGLO_05551 [Colletotrichum gloeosporioides Cg-14]	vda:VDAG_01192	DNA mismatch repair protein msh6; K08737 DNA mismatch repair protein MSH6	GO:0036297 interstrand cross-link repair | GO:0000710 meiotic mismatch repair	GO:0032138 single base insertion or deletion binding | GO:0032137 guanine/thymine mispair binding | GO:0005524 ATP binding | GO:0016887 ATPase activity | GO:0000400 four-way junction DNA binding	GO:0032301 MutSalpha complex
CGLO_09375	5.1254	2.30375	-1.15368	Down	0.340352	354	EQB51113	gi|530470080|gb|EQB51113.1|	hypothetical protein CGLO_09375 [Colletotrichum gloeosporioides Cg-14]	--	--	--	--	--
CGLO_11952	1.43659	1.08729	-0.401912	Down	0.858664	363	EQB48779	gi|530467095|gb|EQB48779.1|	hypothetical protein CGLO_11952 [Colletotrichum gloeosporioides Cg-14]	--	--	--	--	--
CGLO_09076	72.1195	123.913	0.780863	Up	0.223246	762	EQB51394	gi|530470409|gb|EQB51394.1|	hypothetical protein CGLO_09076 [Colletotrichum gloeosporioides Cg-14]	vda:VDAG_07520	hypothetical protein; K20185 biogenesis of lysosome-related organelles complex 1 subunit 1	--	--	GO:0031083 BLOC-1 complex
CGLO_05091	2.45629	1.45749	-0.753	Down	0.591049	996	EQB55018	gi|530474851|gb|EQB55018.1|	zinc-binding dehydrogenase [Colletotrichum gloeosporioides Cg-14]	tpf:TPHA_0A00140	TPHA0A00140; hypothetical protein; K00002 alcohol dehydrogenase (NADP+) [EC:1.1.1.2]	GO:0006355 regulation of transcription, DNA-templated | GO:0055114 oxidation-reduction process	GO:0043565 sequence-specific DNA binding | GO:0003700 transcription factor activity, sequence-specific DNA binding | GO:0016491 oxidoreductase activity | GO:0008270 zinc ion binding	--
CGLO_09821	1688.96	1412.27	-0.258116	Down	0.743379	3450	EQB50714	gi|530469595|gb|EQB50714.1|	SH3 domain-containing protein [Colletotrichum gloeosporioides Cg-14]	vda:VDAG_08851	cytoskeleton assembly control protein SLA1; K20046 actin cytoskeleton-regulatory complex protein SLA1	GO:0006897 endocytosis | GO:0030041 actin filament polymerization	GO:0042802 identical protein binding | GO:0030674 protein binding, bridging | GO:0008092 cytoskeletal protein binding | GO:0043130 ubiquitin binding	GO:0005634 nucleus | GO:0030479 actin cortical patch
CGLO_11995	1.44627	1.45168	0.00538841	Up	0.996656	1377	EQB48745	gi|530467051|gb|EQB48745.1|	hypothetical protein CGLO_11995 [Colletotrichum gloeosporioides Cg-14]	nhe:NECHADRAFT_53111	hypothetical protein; K01213 galacturan 1,4-alpha-galacturonidase [EC:3.2.1.67]	GO:0005975 carbohydrate metabolic process | GO:0071555 cell wall organization	GO:0004650 polygalacturonase activity	GO:0005576 extracellular region
CGLO_15550	2839.59	2230.57	-0.348269	Down	0.7128	1599	EQB45554	gi|530462710|gb|EQB45554.1|	amino acid permease [Colletotrichum gloeosporioides Cg-14]	nfi:NFIA_039160	choline transport protein; K19564 choline transport protein	GO:0003333 amino acid transmembrane transport | GO:1902047 polyamine transmembrane transport	GO:0015203 polyamine transmembrane transporter activity | GO:0015171 amino acid transmembrane transporter activity	GO:0005794 Golgi apparatus | GO:0016021 integral component of membrane
CGLO_17101	26.2027	18.4962	-0.502481	Down	0.748538	897	EQB44187	gi|530460965|gb|EQB44187.1|	hypothetical protein CGLO_17101 [Colletotrichum gloeosporioides Cg-14]	bsc:COCSADRAFT_164648	hypothetical protein; K01259 proline iminopeptidase [EC:3.4.11.5]	GO:0006508 proteolysis	GO:0008233 peptidase activity	--
CGLO_07902	601.856	409.785	-0.554553	Down	0.319467	1035	EQB52475	gi|530471737|gb|EQB52475.1|	hypothetical protein CGLO_07902 [Colletotrichum gloeosporioides Cg-14]	cgr:CAGL0H03091g	hypothetical protein; K03593 ATP-binding protein involved in chromosome partitioning	GO:0016226 iron-sulfur cluster assembly	GO:0046872 metal ion binding | GO:0005524 ATP binding | GO:0051539 4 iron, 4 sulfur cluster binding	GO:0005737 cytoplasm
CGLO_00449	76.9828	103.984	0.433754	Up	0.635671	3570	EQB59191	gi|530480131|gb|EQB59191.1|	hypothetical protein CGLO_00449 [Colletotrichum gloeosporioides Cg-14]	dha:DEHA2D16632g	DEHA2D16632p; K05294 glycosylphosphatidylinositol deacylase [EC:3.-.-.-]	GO:0030433 ER-associated ubiquitin-dependent protein catabolic process | GO:0006888 ER to Golgi vesicle-mediated transport | GO:0006886 intracellular protein transport | GO:0006621 protein retention in ER lumen | GO:0006505 GPI anchor metabolic process | GO:0016050 vesicle organization	GO:0050185 phosphatidylinositol deacylase activity	GO:0016021 integral component of membrane | GO:0005783 endoplasmic reticulum
CGLO_11627	2.74254	3.93774	0.521858	Up	0.839249	1335	EQB49066	gi|530467489|gb|EQB49066.1|	hypothetical protein CGLO_11627 [Colletotrichum gloeosporioides Cg-14]	fpu:FPSE_00700	hypothetical protein; K01427 urease [EC:3.5.1.5]	GO:0006351 transcription, DNA-templated	GO:0008270 zinc ion binding | GO:0003677 DNA binding	GO:0005634 nucleus
CGLO_01156	3.85556	3.86553	0.00372425	Up	0.997679	702	EQB58580	gi|530479373|gb|EQB58580.1|	catabolic 3-dehydroquinase [Colletotrichum gloeosporioides Cg-14]	--	--	--	--	--
CGLO_08339	10.5321	10.8342	0.0408014	Up	0.980414	3075	EQB52061	gi|530471237|gb|EQB52061.1|	hypothetical protein CGLO_08339 [Colletotrichum gloeosporioides Cg-14]	afv:AFLA_005310	vacuolar ATP synthase proteolipid subunit, putative; K02155 V-type H+-transporting ATPase 16kDa proteolipid subunit	GO:0009116 nucleoside metabolic process	GO:0003824 catalytic activity	--
CGLO_04280	45.956	41.0841	-0.161673	Down	0.938616	1917	EQB55761	gi|530475743|gb|EQB55761.1|	platelet-activating factor acetylhydrolase [Colletotrichum gloeosporioides Cg-14]	vda:VDAG_01071	phospholipase A2; K01062 platelet-activating factor acetylhydrolase [EC:3.1.1.47]	GO:0016042 lipid catabolic process	GO:0003847 1-alkyl-2-acetylglycerophosphocholine esterase activity	--
CGLO_07896	20.5965	218.224	3.40534	Up	1.16e-15	3888	EQB52469	gi|530471731|gb|EQB52469.1|	glycoprotein X [Colletotrichum gloeosporioides Cg-14]	--	--	--	--	--
CGLO_17132	0.189351	0.175782	-0.107279	Down	0.94343	1488	EQB44133	gi|530460905|gb|EQB44133.1|	hypothetical protein CGLO_17132 [Colletotrichum gloeosporioides Cg-14]	--	--	--	--	--
CGLO_13792	45.149	16.7369	-1.43166	Down	0.0646201	1131	EQB47107	gi|530464854|gb|EQB47107.1|	hypothetical protein CGLO_13792 [Colletotrichum gloeosporioides Cg-14]	ani:AN9039.2	hypothetical protein; K01613 phosphatidylserine decarboxylase [EC:4.1.1.65]	--	--	GO:0016021 integral component of membrane
CGLO_09819	111.669	84.4351	-0.403311	Down	0.517349	1323	EQB50712	gi|530469593|gb|EQB50712.1|	Dor1-like family protein [Colletotrichum gloeosporioides Cg-14]	vda:VDAG_08853	hypothetical protein; K20295 conserved oligomeric Golgi complex subunit 8	--	--	GO:0017119 Golgi transport complex
CGLO_04800	464.492	375.968	-0.305044	Down	0.598305	2457	EQB55287	gi|530475173|gb|EQB55287.1|	aconitate hydratase [Colletotrichum gloeosporioides Cg-14]	val:VDBG_00671	aconitate hydratase; K17450 homoaconitase [EC:4.2.1.-]	GO:0006099 tricarboxylic acid cycle	GO:0046872 metal ion binding | GO:0051539 4 iron, 4 sulfur cluster binding | GO:0003994 aconitate hydratase activity	GO:0005634 nucleus | GO:0005739 mitochondrion
CGLO_15136	0.890401	0.672546	-0.404822	Down	0.777873	390	EQB45913	gi|530463167|gb|EQB45913.1|	hypothetical protein CGLO_15136 [Colletotrichum gloeosporioides Cg-14]	--	--	--	--	--
CGLO_14363	18.1577	32.537	0.841502	Up	0.495297	1152	EQB46570	gi|530464083|gb|EQB46570.1|	mandelate racemase/muconate lactonizing enzyme domain-containing protein [Colletotrichum gloeosporioides Cg-14]	fpu:FPSE_05319	hypothetical protein; K01684 galactonate dehydratase [EC:4.2.1.6]	GO:0009063 cellular amino acid catabolic process	GO:0003824 catalytic activity	--
CGLO_03774	153.293	209.847	0.453048	Up	0.748419	2046	EQB56237	gi|530476317|gb|EQB56237.1|	potassium ion channel Yvc1 [Colletotrichum gloeosporioides Cg-14]	mbe:MBM_00689	cation-transporting ATPase 4; K14950 cation-transporting ATPase 13A1 [EC:3.6.3.-]	GO:0034765 regulation of ion transmembrane transport | GO:0070588 calcium ion transmembrane transport | GO:0035725 sodium ion transmembrane transport | GO:0071805 potassium ion transmembrane transport | GO:0030003 cellular cation homeostasis	GO:0005262 calcium channel activity | GO:0005227 calcium activated cation channel activity | GO:0005244 voltage-gated ion channel activity | GO:0005272 sodium channel activity | GO:0005267 potassium channel activity	GO:0016021 integral component of membrane | GO:0000329 fungal-type vacuole membrane
CGLO_05873	974.479	897.881	-0.118108	Down	0.91157	453	EQB54299	gi|596665668|ref|XP_007275959.1|	40s ribosomal protein s14 [Colletotrichum gloeosporioides Nara gc5] >gi|429860234|gb|ELA34976.1| 40s ribosomal protein s14 [Colletotrichum gloeosporioides Nara gc5] >gi|477526737|gb|ENH78595.1| 40s ribosomal protein s14 [Colletotrichum orbiculare MAFF 240422]	cthr:CTHT_0071230	40S ribosomal protein S14-like protein; K02955 small subunit ribosomal protein S14e	GO:0006412 translation	GO:0003735 structural constituent of ribosome	GO:0005840 ribosome
CGLO_01117	176.608	153.209	-0.205055	Down	0.869833	603	EQB58619	gi|530479425|gb|EQB58619.1|	cellulase [Colletotrichum gloeosporioides Cg-14]	val:VDBG_06001	endoglucanase; K01179 endoglucanase [EC:3.2.1.4]	GO:0005975 carbohydrate metabolic process	GO:0004553 hydrolase activity, hydrolyzing O-glycosyl compounds	--
CGLO_03372	2.6764	2.25567	-0.24674	Down	0.938616	1560	EQB56609	gi|530476764|gb|EQB56609.1|	hypothetical protein CGLO_03372 [Colletotrichum gloeosporioides Cg-14]	--	--	--	--	--
CGLO_06685	2.71381	1.51147	-0.844367	Down	0.528722	1068	EQB53567	gi|530473078|gb|EQB53567.1|	integral membrane protein [Colletotrichum gloeosporioides Cg-14]	ang:ANI_1_1276104	An12g10770; hypothetical protein; K00108 choline dehydrogenase [EC:1.1.99.1]	--	--	GO:0016021 integral component of membrane
CGLO_00550	4.65814	6.34416	0.445674	Up	0.859353	1398	EQB59107	gi|530480028|gb|EQB59107.1|	major facilitator superfamily transporter [Colletotrichum gloeosporioides Cg-14]	smp:SMAC_00896	hypothetical protein; K08176 MFS transporter, PHS family, inorganic phosphate transporter	GO:0055085 transmembrane transport	--	GO:0016021 integral component of membrane
CGLO_11286	484.835	553.707	0.19163	Up	0.850884	3243	EQB49389	gi|530467894|gb|EQB49389.1|	cyclic nucleotide-binding domain-containing protein [Colletotrichum gloeosporioides Cg-14]	vda:VDAG_04374	sulfate transporter family protein; K03321 sulfate permease, SulP family	GO:1902358 sulfate transmembrane transport	GO:0008271 secondary active sulfate transmembrane transporter activity	GO:0000324 fungal-type vacuole | GO:0016021 integral component of membrane
CGLO_06828	9.69364	11.9205	0.298337	Up	0.91157	1599	EQB53445	gi|530472930|gb|EQB53445.1|	hypothetical protein CGLO_06828 [Colletotrichum gloeosporioides Cg-14]	afv:AFLA_020970	transcription factor TFIIIB complex subunit Brf1, putative; K15196 transcription factor IIIB 90 kDa subunit	GO:0055085 transmembrane transport | GO:0008643 carbohydrate transport	GO:0022891 substrate-specific transmembrane transporter activity	GO:0016021 integral component of membrane
CGLO_11397	245.538	206.843	-0.247404	Down	0.816108	1767	EQB49279	gi|530467764|gb|EQB49279.1|	hypothetical protein CGLO_11397 [Colletotrichum gloeosporioides Cg-14]	cthr:CTHT_0069670	WD40 repeat-containing protein; K11786 ATP-dependent helicase STH1/SNF2 [EC:3.6.4.-]	--	--	--
CGLO_06103	0.418276	0.484675	0.212561	Up	0.902858	1599	EQB54102	gi|530473728|gb|EQB54102.1|	protein kinase [Colletotrichum gloeosporioides Cg-14]	bor:COCMIDRAFT_102812	hypothetical protein; K07359 calcium/calmodulin-dependent protein kinase kinase 2 [EC:2.7.11.17]	GO:0006468 protein phosphorylation	GO:0004672 protein kinase activity | GO:0005524 ATP binding	--
CGLO_14678	310.112	243.929	-0.34633	Down	0.597603	432	EQB46282	gi|596671876|ref|XP_007277137.1|	hypothetical protein CGGC5_6292 [Colletotrichum gloeosporioides Nara gc5] >gi|429859007|gb|ELA33807.1| hypothetical protein CGGC5_6292 [Colletotrichum gloeosporioides Nara gc5]	--	--	--	--	GO:0016021 integral component of membrane
CGLO_12613	2.60871	2.12074	-0.298768	Down	0.923151	351	EQB48180	gi|530466331|gb|EQB48180.1|	hypothetical protein CGLO_12613 [Colletotrichum gloeosporioides Cg-14]	--	--	--	--	--
CGLO_16092	2.7841	14.0105	2.33123	Up	0.0039242	1866	EQB45086	gi|530462119|gb|EQB45086.1|	hypothetical protein CGLO_16092 [Colletotrichum gloeosporioides Cg-14]	--	--	--	--	--
CGLO_02864	69.2732	152.646	1.13982	Up	0.012309	912	EQB57059	gi|530477527|gb|EQB57059.1|	hypothetical protein CGLO_02864 [Colletotrichum gloeosporioides Cg-14]	ure:UREG_03101	similar to TPA: TPA_exp: CaaX protease; K08658 prenyl protein peptidase [EC:3.4.22.-]	--	--	--
CGLO_14634	0.399508	0.350847	-0.18738	Down	0.902858	351	EQB46319	gi|530463734|gb|EQB46319.1|	hypothetical protein CGLO_14634 [Colletotrichum gloeosporioides Cg-14]	--	--	--	--	--
CGLO_00460	264.132	87.2303	-1.59836	Down	0.0113035	1380	EQB59185	gi|530480123|gb|EQB59185.1|	hypothetical protein CGLO_00460 [Colletotrichum gloeosporioides Cg-14]	tmn:UCRPA7_3289	putative bifunctional p-450:nadph-p450 reductase protein; K14338 cytochrome P450 / NADPH-cytochrome P450 reductase [EC:1.14.14.1 1.6.2.4]	GO:0055114 oxidation-reduction process	GO:0046872 metal ion binding | GO:0016705 oxidoreductase activity, acting on paired donors, with incorporation or reduction of molecular oxygen | GO:0097159 organic cyclic compound binding | GO:1901363 heterocyclic compound binding	--
CGLO_04107	4.30777	10.0638	1.22416	Up	0.311716	1593	EQB55933	gi|530475955|gb|EQB55933.1|	hypothetical protein CGLO_04107 [Colletotrichum gloeosporioides Cg-14]	--	--	GO:0055114 oxidation-reduction process	GO:0016491 oxidoreductase activity	--
CGLO_04211	58.5576	33.1415	-0.821218	Down	0.284817	1962	EQB55826	gi|530475821|gb|EQB55826.1|	hypothetical protein CGLO_04211 [Colletotrichum gloeosporioides Cg-14]	pfj:MYCFIDRAFT_199933	hypothetical protein; K19347 SUN domain-containing protein 1/2	--	--	GO:0016021 integral component of membrane
CGLO_11119	1.44531	1.11062	-0.380019	Down	0.795236	765	EQB49527	gi|530468082|gb|EQB49527.1|	hypothetical protein CGLO_11119 [Colletotrichum gloeosporioides Cg-14]	--	--	--	GO:0003676 nucleic acid binding | GO:0046872 metal ion binding	--
CGLO_07755	52.0388	56.0503	0.107133	Up	0.94343	900	EQB52603	gi|530471895|gb|EQB52603.1|	PCI domain-containing protein [Colletotrichum gloeosporioides Cg-14]	maj:MAA_00525	PCI domain-containing protein; K12180 COP9 signalosome complex subunit 7	--	--	--
CGLO_09360	145.748	202.469	0.474223	Up	0.52532	1323	EQB51138	gi|530470109|gb|EQB51138.1|	brix domain-containing protein [Colletotrichum gloeosporioides Cg-14]	nhe:NECHADRAFT_42524	hypothetical protein; K14859 ribosome biogenesis protein SSF1/2	--	--	--
CGLO_01272	9.99146	13.3592	0.41907	Up	0.853363	684	EQB58480	gi|530479247|gb|EQB58480.1|	hypothetical protein CGLO_01272 [Colletotrichum gloeosporioides Cg-14]	pte:PTT_19768	hypothetical protein; K08158 MFS transporter, DHA1 family, multidrug resistance protein	--	--	--
CGLO_12993	1.53472	1.97399	0.363136	Up	0.868662	630	EQB47839	gi|530465884|gb|EQB47839.1|	hypothetical protein CGLO_12993 [Colletotrichum gloeosporioides Cg-14]	--	--	--	--	--
CGLO_01337	14.2116	19.0851	0.425375	Up	0.853363	735	EQB58414	gi|530479170|gb|EQB58414.1|	hypothetical protein CGLO_01337 [Colletotrichum gloeosporioides Cg-14]	--	--	GO:0098869 cellular oxidant detoxification	GO:0004601 peroxidase activity	--
CGLO_07335	12.8782	10.4452	-0.302095	Down	0.902858	6576	EQB52988	gi|530472363|gb|EQB52988.1|	hypothetical protein CGLO_07335 [Colletotrichum gloeosporioides Cg-14]	pcs:Pc21g12450	Pc21g12450; K15417 zearalenone synthase, nonreducing iterative type I polyketide synthase	GO:0009058 biosynthetic process	GO:0016740 transferase activity | GO:0016788 hydrolase activity, acting on ester bonds	--
CGLO_15483	7.68738	21.6979	1.49699	Up	0.0844452	1716	EQB45617	gi|530462791|gb|EQB45617.1|	carboxylesterase [Colletotrichum gloeosporioides Cg-14]	afm:AFUA_8G02530	extracellular lipase; K01046 triacylglycerol lipase [EC:3.1.1.3]	GO:0008152 metabolic process	GO:0016787 hydrolase activity	--
CGLO_12815	24.5848	23.0887	-0.0905782	Down	0.966181	1008	EQB47992	gi|530466077|gb|EQB47992.1|	hypothetical protein CGLO_12815 [Colletotrichum gloeosporioides Cg-14]	--	--	--	--	--
CGLO_15911	44.9405	35.273	-0.349455	Down	0.847457	822	EQB45244	gi|530462311|gb|EQB45244.1|	hypothetical protein CGLO_15911 [Colletotrichum gloeosporioides Cg-14]	vda:VDAG_03865	hypothetical protein; K15136 mediator of RNA polymerase II transcription subunit 18, fungi type	GO:0006357 regulation of transcription from RNA polymerase II promoter	GO:0001104 RNA polymerase II transcription cofactor activity	GO:0016592 mediator complex
CGLO_15182	2.83806	1.56972	-0.854402	Down	0.522617	1152	EQB45871	gi|530463107|gb|EQB45871.1|	TfdA family Taurine catabolism dioxygenase TauD [Colletotrichum gloeosporioides Cg-14]	val:VDBG_09261	alpha-ketoglutarate-dependent sulfonate dioxygenase; K19245 sulfonate dioxygenase [EC:1.14.11.-]	GO:0044273 sulfur compound catabolic process | GO:0055114 oxidation-reduction process	GO:0000907 sulfonate dioxygenase activity	--
CGLO_02117	8.52689	6.68123	-0.351905	Down	0.902858	1518	EQB57717	gi|530478343|gb|EQB57717.1|	hypothetical protein CGLO_02117 [Colletotrichum gloeosporioides Cg-14]	nfi:NFIA_100480	FAD binding domain protein; K18386 FAD dependent monooxygenase [EC:1.14.13.-]	GO:0055114 oxidation-reduction process	GO:0071949 FAD binding | GO:0016491 oxidoreductase activity	--
CGLO_11281	35.6664	20.2843	-0.814207	Down	0.433071	654	EQB49392	gi|530467898|gb|EQB49392.1|	hypothetical protein CGLO_11281 [Colletotrichum gloeosporioides Cg-14]	gtr:GLOTRDRAFT_139115	DUF500-domain-containing protein; K20523 SH3 domain-containing YSC84-like protein 1	--	--	--
CGLO_10389	276.461	283.522	0.0363883	Up	0.973552	3780	EQB50193	gi|530468938|gb|EQB50193.1|	RecF/RecN/SMC N terminal domain-containing protein [Colletotrichum gloeosporioides Cg-14]	vda:VDAG_04575	hypothetical protein; K06636 structural maintenance of chromosome 1	GO:0000070 mitotic sister chromatid segregation | GO:0006302 double-strand break repair | GO:0007165 signal transduction	GO:0000217 DNA secondary structure binding | GO:0004871 signal transducer activity | GO:0003680 AT DNA binding | GO:0042802 identical protein binding | GO:0005524 ATP binding	GO:0016021 integral component of membrane | GO:0034990 nuclear mitotic cohesin complex
CGLO_01918	1294.64	1111.25	-0.22037	Down	0.902858	3114	EQB57899	gi|530478558|gb|EQB57899.1|	hypothetical protein CGLO_01918 [Colletotrichum gloeosporioides Cg-14]	val:VDBG_01018	fatty acid synthase subunit beta dehydratase; K00668 fatty acid synthase subunit beta, fungi type [EC:2.3.1.86]	GO:0055114 oxidation-reduction process | GO:0042759 long-chain fatty acid biosynthetic process	GO:0004319 enoyl-[acyl-carrier-protein] reductase (NADPH, B-specific) activity | GO:0004318 enoyl-[acyl-carrier-protein] reductase (NADH) activity | GO:0004314 [acyl-carrier-protein] S-malonyltransferase activity | GO:0016409 palmitoyltransferase activity | GO:0019171 3-hydroxyacyl-[acyl-carrier-protein] dehydratase activity | GO:0004313 [acyl-carrier-protein] S-acetyltransferase activity	GO:0005739 mitochondrion | GO:0005811 lipid particle | GO:0005835 fatty acid synthase complex
CGLO_07786	39.3111	16.3464	-1.26597	Down	0.048339	1488	EQB52584	gi|530471868|gb|EQB52584.1|	major facilitator superfamily transporter [Colletotrichum gloeosporioides Cg-14]	yli:YALI0D13970g	YALI0D13970p; K08192 MFS transporter, ACS family, allantoate permease	GO:0055085 transmembrane transport	--	GO:0016021 integral component of membrane
CGLO_10196	209.035	253.299	0.277098	Up	0.847889	882	EQB50367	gi|530469142|gb|EQB50367.1|	hypothetical protein CGLO_10196 [Colletotrichum gloeosporioides Cg-14]	--	--	GO:0015992 proton transport | GO:0006813 potassium ion transport	--	GO:0031305 integral component of mitochondrial inner membrane
CGLO_05544	12.7177	15.5267	0.287906	Up	0.910897	2037	EQB54594	gi|530474350|gb|EQB54594.1|	hypothetical protein CGLO_05544 [Colletotrichum gloeosporioides Cg-14]	vda:VDAG_01278	transcription factor tau subunit sfc1; K15202 general transcription factor 3C polypeptide 5 (transcription factor C subunit 1)	GO:0001041 transcription from a RNA polymerase III hybrid type promoter | GO:0001021 RNA polymerase III type 2 promoter transcriptional preinitiation complex assembly | GO:0000999 RNA polymerase III type 1 promoter transcriptional preinitiation complex assembly	--	GO:0000127 transcription factor TFIIIC complex
CGLO_08257	2.96376	6.26582	1.08007	Up	0.413541	972	EQB52147	gi|530471352|gb|EQB52147.1|	glycosyl hydrolase family 61 [Colletotrichum gloeosporioides Cg-14]	fgr:FGSG_06397	hypothetical protein; K19356 cellulase [EC:3.2.1.4]	GO:0008152 metabolic process	GO:0016787 hydrolase activity	--
CGLO_07454	23.2183	32.4747	0.484054	Up	0.701713	1866	EQB52884	gi|530472241|gb|EQB52884.1|	amino acid permease [Colletotrichum gloeosporioides Cg-14]	cthr:CTHT_0022590	phosphatidylinositol 4-kinase-like protein; K19801 phosphatidylinositol 4-kinase B [EC:2.7.1.67]	GO:0003333 amino acid transmembrane transport	GO:0015171 amino acid transmembrane transporter activity	GO:0016021 integral component of membrane
CGLO_17302	93.576	74.3502	-0.331803	Down	0.816108	1452	EQB43969	gi|530460691|gb|EQB43969.1|	hypothetical protein CGLO_17302 [Colletotrichum gloeosporioides Cg-14]	cim:CIMG_04220	multidrug resistance protein; K08157 MFS transporter, DHA1 family, multidrug resistance protein	GO:0055085 transmembrane transport	--	GO:0016021 integral component of membrane
CGLO_13509	168.965	111.648	-0.597773	Down	0.315536	1485	EQB47356	gi|530465212|gb|EQB47356.1|	hypothetical protein CGLO_13509 [Colletotrichum gloeosporioides Cg-14]	--	--	GO:0008152 metabolic process	GO:0003824 catalytic activity	--
CGLO_11387	0.65875	0.854047	0.374584	Up	0.805825	1233	EQB49290	gi|530467777|gb|EQB49290.1|	major facilitator superfamily transporter [Colletotrichum gloeosporioides Cg-14]	ani:AN3929.2	hypothetical protein; K11369 retrograde regulation protein 2	GO:0055085 transmembrane transport	--	GO:0016021 integral component of membrane
CGLO_03996	4.82753	4.61738	-0.0642102	Down	0.976348	1689	EQB56018	gi|530476061|gb|EQB56018.1|	hypothetical protein CGLO_03996 [Colletotrichum gloeosporioides Cg-14]	ela:UCREL1_8682	putative copper homeostasis protein cutc protein; K06201 copper homeostasis protein	--	--	--
CGLO_07835	0.284018	0.311452	0.133025	Up	0.938616	1815	EQB52536	gi|530471808|gb|EQB52536.1|	major facilitator superfamily transporter [Colletotrichum gloeosporioides Cg-14]	tmn:UCRPA7_472	putative benomyl methotrexate resistance protein; K08158 MFS transporter, DHA1 family, multidrug resistance protein	GO:0055085 transmembrane transport	--	GO:0016021 integral component of membrane
CGLO_05001	426.452	383.58	-0.152854	Down	0.902858	1386	EQB55098	gi|530474948|gb|EQB55098.1|	hypothetical protein CGLO_05001 [Colletotrichum gloeosporioides Cg-14]	tre:TRIREDRAFT_78806	hypothetical protein; K10597 ubiquitin conjugation factor E4 B [EC:2.3.2.27]	GO:0016567 protein ubiquitination	GO:0008270 zinc ion binding | GO:0004842 ubiquitin-protein transferase activity	--
CGLO_01764	65.7255	80.549	0.293414	Up	0.887341	1770	EQB58050	gi|530478733|gb|EQB58050.1|	hypothetical protein CGLO_01764 [Colletotrichum gloeosporioides Cg-14]	--	--	--	--	GO:0016021 integral component of membrane
CGLO_05968	1166.6	817.699	-0.512662	Down	0.137304	3144	EQB54223	gi|530473885|gb|EQB54223.1|	phosphatidylinositol-specific phospholipase C [Colletotrichum gloeosporioides Cg-14]	nhe:NECHADRAFT_85080	hypothetical protein; K05857 phosphatidylinositol phospholipase C, delta [EC:3.1.4.11]	GO:0001402 signal transduction involved in filamentous growth | GO:0009395 phospholipid catabolic process | GO:0048017 inositol lipid-mediated signaling | GO:0034501 protein localization to kinetochore | GO:0034644 cellular response to UV | GO:0032958 inositol phosphate biosynthetic process	GO:0004435 phosphatidylinositol phospholipase C activity | GO:0005509 calcium ion binding | GO:0004871 signal transducer activity	GO:0005829 cytosol | GO:0000778 condensed nuclear chromosome kinetochore
CGLO_12463	962.995	674.186	-0.514383	Down	0.493116	795	EQB48312	gi|596650797|ref|XP_007273181.1|	GTP-binding protein rab2 [Colletotrichum gloeosporioides Nara gc5] >gi|429863306|gb|ELA37780.1| GTP-binding protein rab2 [Colletotrichum gloeosporioides Nara gc5]	yli:YALI0F23529g	YALI0F23529p; K07877 Ras-related protein Rab-2A	GO:0007264 small GTPase mediated signal transduction | GO:0015031 protein transport	GO:0005525 GTP binding	GO:0005622 intracellular
CGLO_03261	0.464806	0.48142	0.0506679	Up	0.968093	3267	EQB56707	gi|530477087|gb|EQB56707.1|	subtilase [Colletotrichum gloeosporioides Cg-14]	mlr:MELLADRAFT_44205	subtilisin protease; K01336 cerevisin [EC:3.4.21.48]	GO:0006508 proteolysis	GO:0004252 serine-type endopeptidase activity	GO:0016020 membrane | GO:0005618 cell wall
CGLO_12033	23.4644	15.2428	-0.62234	Down	0.702564	825	EQB48733	gi|530467035|gb|EQB48733.1|	hypothetical protein CGLO_12033 [Colletotrichum gloeosporioides Cg-14]	afv:AFLA_124520	tubulin, putative; K07375 tubulin beta	--	--	GO:0016021 integral component of membrane
CGLO_08996	2.91022	4.57801	0.653593	Up	0.745437	783	EQB51459	gi|530470494|gb|EQB51459.1|	hemerythrin HHE cation binding domain-containing protein [Colletotrichum gloeosporioides Cg-14]	--	--	GO:0000462 maturation of SSU-rRNA from tricistronic rRNA transcript (SSU-rRNA, 5.8S rRNA, LSU-rRNA)	--	GO:0030686 90S preribosome | GO:0005730 nucleolus | GO:0032040 small-subunit processome
CGLO_10198	55.2189	65.6292	0.249174	Up	0.902858	1197	EQB50369	gi|530469144|gb|EQB50369.1|	hypothetical protein CGLO_10198 [Colletotrichum gloeosporioides Cg-14]	vda:VDAG_09011	GATA type zinc finger protein Asd4; K09184 GATA-binding protein, other eukaryote	--	--	--
CGLO_16924	723.7	628.925	-0.202504	Down	0.902858	987	EQB44340	gi|530461168|gb|EQB44340.1|	NAD dependent epimerase/dehydratase [Colletotrichum gloeosporioides Cg-14]	spaa:SPAPADRAFT_60483	hypothetical protein; K17741 NADPH-dependent methylglyoxal reductase [EC:1.1.1.283]	GO:0008152 metabolic process	GO:0016491 oxidoreductase activity | GO:0050662 coenzyme binding	--
CGLO_04656	1.26408	1.33098	0.074397	Up	0.967025	1200	EQB55417	gi|530475331|gb|EQB55417.1|	hypothetical protein CGLO_04656 [Colletotrichum gloeosporioides Cg-14]	aor:AOR_1_60154	AO090003000032; hypothetical protein; K00108 choline dehydrogenase [EC:1.1.99.1]	--	--	GO:0016021 integral component of membrane
CGLO_08966	1916.85	1104.77	-0.794995	Down	0.0357649	1089	EQB51489	gi|530470531|gb|EQB51489.1|	hypothetical protein CGLO_08966 [Colletotrichum gloeosporioides Cg-14]	ure:UREG_00738	hypothetical protein; K12584 m7GpppX diphosphatase [EC:3.6.1.59]	GO:0032259 methylation	GO:0008168 methyltransferase activity	--
CGLO_17755	0.425164	0.373378	-0.18738	Down	0.902858	528	EQB43566	gi|530460183|gb|EQB43566.1|	hypothetical protein CGLO_17755 [Colletotrichum gloeosporioides Cg-14]	--	--	--	--	GO:0016021 integral component of membrane
CGLO_05395	844.272	508.493	-0.731478	Down	0.141951	1755	EQB54743	gi|149930356|gb|ABR37627.1|	putative zinc finger transcription regulator Pac1 [Colletotrichum gloeosporioides] >gi|530474538|gb|EQB54743.1| hypothetical protein CGLO_05395 [Colletotrichum gloeosporioides Cg-14]	--	--	--	GO:0003676 nucleic acid binding | GO:0046872 metal ion binding	--
CGLO_01848	15.0614	17.0133	0.175801	Up	0.939537	1050	EQB57968	gi|530478637|gb|EQB57968.1|	pectinesterase [Colletotrichum gloeosporioides Cg-14]	bsc:COCSADRAFT_222953	carbohydrate esterase family 8 protein; K01051 pectinesterase [EC:3.1.1.11]	GO:0042545 cell wall modification | GO:0045490 pectin catabolic process	GO:0030599 pectinesterase activity | GO:0045330 aspartyl esterase activity	GO:0005618 cell wall | GO:0005576 extracellular region
CGLO_06888	134.098	103.523	-0.373343	Down	0.759671	1071	EQB53392	gi|530472869|gb|EQB53392.1|	hypothetical protein CGLO_06888 [Colletotrichum gloeosporioides Cg-14]	--	--	--	--	--
CGLO_14131	2810.48	3128.27	0.15455	Up	0.94343	3321	EQB46789	gi|530464383|gb|EQB46789.1|	hypothetical protein CGLO_14131 [Colletotrichum gloeosporioides Cg-14]	vda:VDAG_02927	calcium-transporting ATPase; K01539 sodium/potassium-transporting ATPase subunit alpha [EC:3.6.3.9]	GO:0008152 metabolic process	GO:0046872 metal ion binding | GO:0005524 ATP binding | GO:0016787 hydrolase activity	GO:0016021 integral component of membrane
CGLO_01667	15.5499	14.4696	-0.103889	Down	0.966181	1185	EQB58129	gi|530478830|gb|EQB58129.1|	helix-loop-helix DNA-binding domain-containing protein [Colletotrichum gloeosporioides Cg-14]	cthr:CTHT_0060010	delta-1-pyrroline-5-carboxylate dehydrogenase-like protein; K00294 1-pyrroline-5-carboxylate dehydrogenase [EC:1.2.1.88]	--	GO:0046983 protein dimerization activity | GO:0003677 DNA binding	--
CGLO_02540	118.799	213.546	0.846019	Up	0.0272016	1632	EQB57349	gi|530477890|gb|EQB57349.1|	Tim44-like domain-containing protein [Colletotrichum gloeosporioides Cg-14]	val:VDBG_06304	mitochondrial inner membrane translocase subunit TIM44; K17804 mitochondrial import inner membrane translocase subunit TIM44	GO:0030150 protein import into mitochondrial matrix	GO:0030674 protein binding, bridging | GO:0051087 chaperone binding	GO:0001405 presequence translocase-associated import motor
CGLO_11325	61.4119	177.708	1.53292	Up	6.8e-06	1773	EQB49351	gi|530467846|gb|EQB49351.1|	multicopper oxidase [Colletotrichum gloeosporioides Cg-14]	sla:SERLADRAFT_362730	Sllcc2; multicopper oxidase; K19791 iron transport multicopper oxidase	GO:0055114 oxidation-reduction process	GO:0016491 oxidoreductase activity | GO:0005507 copper ion binding	--
CGLO_00469	1849.14	1861.9	0.00992056	Up	0.988906	1935	EQB59172	gi|530480107|gb|EQB59172.1|	hypothetical protein CGLO_00469 [Colletotrichum gloeosporioides Cg-14]	vda:VDAG_04207	succinate dehydrogenase flavoprotein subunit; K00234 succinate dehydrogenase (ubiquinone) flavoprotein subunit [EC:1.3.5.1]	GO:0006105 succinate metabolic process | GO:0006099 tricarboxylic acid cycle | GO:0022900 electron transport chain	GO:0050660 flavin adenine dinucleotide binding | GO:0008177 succinate dehydrogenase (ubiquinone) activity	GO:0005743 mitochondrial inner membrane
CGLO_03122	0.536413	0.636002	0.245686	Up	0.869833	636	EQB56841	gi|530477248|gb|EQB56841.1|	hypothetical protein CGLO_03122 [Colletotrichum gloeosporioides Cg-14]	mbe:MBM_05982	WD domain-containing protein; K11293 protein HIRA/HIR1	GO:0055114 oxidation-reduction process	GO:0016491 oxidoreductase activity | GO:0008270 zinc ion binding	--
CGLO_12418	0.425164	0.373378	-0.18738	Down	0.902858	915	EQB48357	gi|530466573|gb|EQB48357.1|	hypothetical protein CGLO_12418 [Colletotrichum gloeosporioides Cg-14]	afv:AFLA_118070	isoflavone reductase family protein (CipA), putative; K06001 tryptophan synthase beta chain [EC:4.2.1.20]	--	--	--
CGLO_08203	0.189351	0.175782	-0.107279	Down	0.94343	669	EQB52183	gi|530471395|gb|EQB52183.1|	hypothetical protein CGLO_08203 [Colletotrichum gloeosporioides Cg-14]	--	--	--	--	--
CGLO_00648	0.330928	0.324752	-0.0271774	Down	0.979526	3858	EQB59034	gi|530479935|gb|EQB59034.1|	glucose-methanol-choline oxidoreductase [Colletotrichum gloeosporioides Cg-14]	mrr:Moror_1980	cellobiose dehydrogenase; K19069 cellobiose dehydrogenase (acceptor) [EC:1.1.99.18]	GO:0055114 oxidation-reduction process	GO:0050660 flavin adenine dinucleotide binding | GO:0016614 oxidoreductase activity, acting on CH-OH group of donors	--
CGLO_12634	78.0965	92.7939	0.248771	Up	0.861118	2235	EQB48154	gi|530466299|gb|EQB48154.1|	hypothetical protein CGLO_12634 [Colletotrichum gloeosporioides Cg-14]	--	--	--	--	--
CGLO_17030	16.0425	10.3766	-0.628571	Down	0.7128	783	EQB44236	gi|530461033|gb|EQB44236.1|	hypothetical protein CGLO_17030 [Colletotrichum gloeosporioides Cg-14]	maj:MAA_11085	hypothetical protein; K00472 prolyl 4-hydroxylase [EC:1.14.11.2]	GO:0055114 oxidation-reduction process	GO:0016705 oxidoreductase activity, acting on paired donors, with incorporation or reduction of molecular oxygen | GO:0031418 L-ascorbic acid binding | GO:0005506 iron ion binding	--
CGLO_08306	98.8339	75.2184	-0.393921	Down	0.605187	1230	EQB52096	gi|596663185|ref|XP_007275510.1|	GTPase activating protein (bud2 cla2) [Colletotrichum gloeosporioides Nara gc5] >gi|429860738|gb|ELA35462.1| GTPase activating protein (bud2 cla2) [Colletotrichum gloeosporioides Nara gc5]	fgr:FGSG_11599	hypothetical protein; K08052 neurofibromin 1	GO:0043087 regulation of GTPase activity | GO:0007121 bipolar cellular bud site selection | GO:0036267 invasive filamentous growth | GO:0007165 signal transduction | GO:0031578 mitotic spindle orientation checkpoint | GO:0007120 axial cellular bud site selection	--	GO:0005935 cellular bud neck
CGLO_11553	1.00361	1.46979	0.550413	Up	0.76638	195	EQB49160	gi|530467610|gb|EQB49160.1|	hypothetical protein CGLO_11553 [Colletotrichum gloeosporioides Cg-14]	--	--	--	--	--
CGLO_13036	12.4405	9.62382	-0.370363	Down	0.902858	1482	EQB47782	gi|530465809|gb|EQB47782.1|	alkaline phosphatase [Colletotrichum gloeosporioides Cg-14]	tmn:UCRPA7_8801	putative alkaline phosphatase protein; K01077 alkaline phosphatase [EC:3.1.3.1]	GO:0016311 dephosphorylation	GO:0004035 alkaline phosphatase activity	--
CGLO_14454	19.7923	19.2938	-0.0367983	Down	0.980195	579	EQB46481	gi|530463965|gb|EQB46481.1|	hypothetical protein CGLO_14454 [Colletotrichum gloeosporioides Cg-14]	ang:ANI_1_2596014	An01g06080; ATP-dependent Clp protease; K03544 ATP-dependent Clp protease ATP-binding subunit ClpX	--	--	--
CGLO_11124	90.0194	460.479	2.35483	Up	3.3e-08	891	EQB49532	gi|530468087|gb|EQB49532.1|	hypothetical protein CGLO_11124 [Colletotrichum gloeosporioides Cg-14]	--	--	--	--	GO:0016021 integral component of membrane
CGLO_14744	2.49461	2.32052	-0.104362	Down	0.966181	1440	EQB46211	gi|530463576|gb|EQB46211.1|	hypothetical protein CGLO_14744 [Colletotrichum gloeosporioides Cg-14]	--	--	--	--	--
CGLO_08826	188.981	181.512	-0.0581781	Down	0.966181	756	EQB51617	gi|530470688|gb|EQB51617.1|	phosphoglycerate mutase [Colletotrichum gloeosporioides Cg-14]	tre:TRIREDRAFT_121240	hypothetical protein; K15634 probable phosphoglycerate mutase [EC:5.4.2.12]	GO:0016311 dephosphorylation | GO:0046390 ribose phosphate biosynthetic process	GO:0050278 sedoheptulose-bisphosphatase activity	--
CGLO_01330	8.73697	12.337	0.497785	Up	0.848484	1503	EQB58429	gi|530479186|gb|EQB58429.1|	hypothetical protein CGLO_01330 [Colletotrichum gloeosporioides Cg-14]	nhe:NECHADRAFT_106263	CHR2113; hypothetical protein; K15711 SWI/SNF-related matrix-associated actin-dependent regulator of chromatin subfamily A3 [EC:3.6.4.- 2.3.2.27]	--	GO:0005524 ATP binding	--
CGLO_08085	5.81528	6.84271	0.23472	Up	0.938616	846	EQB52305	gi|530471535|gb|EQB52305.1|	heterokaryon incompatibility protein [Colletotrichum gloeosporioides Cg-14]	--	--	--	--	--
CGLO_00921	18.4511	29.8234	0.69274	Up	0.548107	846	EQB58773	gi|530479622|gb|EQB58773.1|	fungal chitosanase [Colletotrichum gloeosporioides Cg-14]	afm:AFUA_6G00500	chitosanase; K01233 chitosanase [EC:3.2.1.132]	GO:0000272 polysaccharide catabolic process	GO:0016977 chitosanase activity	GO:0005576 extracellular region
CGLO_12064	1.72309	3.09594	0.845384	Up	0.577293	1842	EQB48676	gi|530466974|gb|EQB48676.1|	hypothetical protein CGLO_12064 [Colletotrichum gloeosporioides Cg-14]	ssl:SS1G_10951	hypothetical protein; K01501 nitrilase [EC:3.5.5.1]	GO:0055114 oxidation-reduction process	GO:0020037 heme binding | GO:0050660 flavin adenine dinucleotide binding | GO:0016705 oxidoreductase activity, acting on paired donors, with incorporation or reduction of molecular oxygen | GO:0016614 oxidoreductase activity, acting on CH-OH group of donors | GO:0005506 iron ion binding	--
CGLO_08943	7.80795	5.76678	-0.437177	Down	0.867393	822	EQB51512	gi|530470557|gb|EQB51512.1|	hypothetical protein CGLO_08943 [Colletotrichum gloeosporioides Cg-14]	--	--	--	--	--
CGLO_05997	460.75	474.565	0.0426217	Up	0.966181	2259	EQB54200	gi|530473851|gb|EQB54200.1|	hypothetical protein CGLO_05997 [Colletotrichum gloeosporioides Cg-14]	vda:VDAG_09995	T-complex protein 1 subunit gamma; K09495 T-complex protein 1 subunit gamma	GO:0006457 protein folding | GO:0007021 tubulin complex assembly	GO:0005524 ATP binding | GO:0051082 unfolded protein binding	GO:0005832 chaperonin-containing T-complex | GO:0005634 nucleus
CGLO_16776	2179.72	1133.02	-0.943963	Down	0.121414	2721	EQB44485	gi|530461351|gb|EQB44485.1|	serin endopeptidase [Colletotrichum gloeosporioides Cg-14]	npa:UCRNP2_3877	putative serine protease protein; K01336 cerevisin [EC:3.4.21.48]	GO:0006508 proteolysis	GO:0004252 serine-type endopeptidase activity	GO:0016020 membrane | GO:0005618 cell wall
CGLO_08155	1477.91	1169.62	-0.337525	Down	0.5134	1596	EQB52231	gi|530471450|gb|EQB52231.1|	IBR domain-containing protein [Colletotrichum gloeosporioides Cg-14]	vda:VDAG_02156	ariadne-1; K11968 ariadne-1 [EC:2.3.2.27]	GO:0016567 protein ubiquitination	GO:0008270 zinc ion binding | GO:0004842 ubiquitin-protein transferase activity	--
CGLO_15973	283.948	239.892	-0.243239	Down	0.77995	1707	EQB45191	gi|530462246|gb|EQB45191.1|	hypothetical protein CGLO_15973 [Colletotrichum gloeosporioides Cg-14]	val:VDBG_08668	FACT complex subunit pob-3; K09272 structure-specific recognition protein 1	GO:0045899 positive regulation of RNA polymerase II transcriptional preinitiation complex assembly | GO:0034613 cellular protein localization | GO:0006261 DNA-dependent DNA replication | GO:0034401 chromatin organization involved in regulation of transcription | GO:0034724 DNA replication-independent nucleosome organization | GO:0030466 chromatin silencing at silent mating-type cassette | GO:0000…	GO:0003677 DNA binding	GO:0034507 chromosome, centromeric outer repeat region | GO:0005829 cytosol | GO:0000790 nuclear chromatin | GO:0035101 FACT complex | GO:0031298 replication fork protection complex
CGLO_06658	54.1826	48.1583	-0.170044	Down	0.938101	885	EQB53609	gi|530473122|gb|EQB53609.1|	hypothetical protein CGLO_06658 [Colletotrichum gloeosporioides Cg-14]	--	--	--	GO:0008270 zinc ion binding | GO:0003676 nucleic acid binding	--
CGLO_04907	7.87038	2.79348	-1.49437	Down	0.126236	1533	EQB55189	gi|530475057|gb|EQB55189.1|	cytochrome P450 [Colletotrichum gloeosporioides Cg-14]	fpu:FPSE_09035	hypothetical protein; K00480 salicylate hydroxylase [EC:1.14.13.1]	GO:0055114 oxidation-reduction process	GO:0020037 heme binding | GO:0016705 oxidoreductase activity, acting on paired donors, with incorporation or reduction of molecular oxygen | GO:0004497 monooxygenase activity | GO:0005506 iron ion binding	GO:0016021 integral component of membrane
CGLO_01693	1627.45	1497.68	-0.11988	Down	0.902858	1122	EQB58098	gi|530478792|gb|EQB58098.1|	methyltransferase domain-containing protein [Colletotrichum gloeosporioides Cg-14]	ure:UREG_00738	hypothetical protein; K12584 m7GpppX diphosphatase [EC:3.6.1.59]	GO:0032259 methylation	GO:0008168 methyltransferase activity	--
CGLO_12954	0.189351	0.175782	-0.107279	Down	0.94343	963	EQB47852	gi|530465903|gb|EQB47852.1|	hypothetical protein CGLO_12954 [Colletotrichum gloeosporioides Cg-14]	tms:TREMEDRAFT_26203	hypothetical protein; K06912 alpha-ketoglutarate-dependent 2,4-dichlorophenoxyacetate dioxygenase [EC:1.14.11.-]	GO:0055114 oxidation-reduction process	GO:0016491 oxidoreductase activity	--
CGLO_06142	45.6145	42.1242	-0.114844	Down	0.952517	636	EQB54068	gi|530473686|gb|EQB54068.1|	dihydrofolate reductase [Colletotrichum gloeosporioides Cg-14]	vda:VDAG_06417	dihydrofolate reductase; K00287 dihydrofolate reductase [EC:1.5.1.3]	GO:0046654 tetrahydrofolate biosynthetic process | GO:0055114 oxidation-reduction process | GO:0009165 nucleotide biosynthetic process | GO:0006545 glycine biosynthetic process | GO:0046452 dihydrofolate metabolic process	GO:0003729 mRNA binding | GO:0004146 dihydrofolate reductase activity | GO:0050661 NADP binding	GO:0005829 cytosol
CGLO_04688	68.8408	151.113	1.13429	Up	0.00746992	621	EQB55389	gi|530475297|gb|EQB55389.1|	acetyltransferase [Colletotrichum gloeosporioides Cg-14]	npa:UCRNP2_5654	putative phenylacetate 2-hydroxylase protein; K10437 phenylacetate 2-hydroxylase [EC:1.14.13.-]	GO:0006357 regulation of transcription from RNA polymerase II promoter	GO:0008270 zinc ion binding | GO:0000981 RNA polymerase II transcription factor activity, sequence-specific DNA binding | GO:0003677 DNA binding | GO:0008080 N-acetyltransferase activity	GO:0005634 nucleus
CGLO_10997	2.22058	2.85033	0.360191	Up	0.902858	1134	EQB49653	gi|530468228|gb|EQB49653.1|	hypothetical protein CGLO_10997 [Colletotrichum gloeosporioides Cg-14]	--	--	--	GO:0043531 ADP binding	--
CGLO_11423	970.139	714.644	-0.440967	Down	0.479561	1602	EQB49256	gi|530467737|gb|EQB49256.1|	CC1-like family splicing factor [Colletotrichum gloeosporioides Cg-14]	nhe:NECHADRAFT_68161	hypothetical protein; K13091 RNA-binding protein 39	GO:0006397 mRNA processing	GO:0003723 RNA binding | GO:0000166 nucleotide binding	GO:0005634 nucleus
CGLO_09083	47.3424	92.1656	0.961096	Up	0.0221318	3537	EQB51380	gi|530470394|gb|EQB51380.1|	hypothetical protein CGLO_09083 [Colletotrichum gloeosporioides Cg-14]	scm:SCHCODRAFT_255991	hypothetical protein; K14859 ribosome biogenesis protein SSF1/2	GO:0008152 metabolic process	GO:0016740 transferase activity	--
CGLO_00166	6.11601	25.2965	2.04827	Up	0.0186499	1209	EQB59442	gi|530480450|gb|EQB59442.1|	hypothetical protein CGLO_00166 [Colletotrichum gloeosporioides Cg-14]	vda:VDAG_07477	mannan endo-1,4-beta-mannosidase; K19355 mannan endo-1,4-beta-mannosidase [EC:3.2.1.78]	GO:0005975 carbohydrate metabolic process	GO:0004553 hydrolase activity, hydrolyzing O-glycosyl compounds	--
CGLO_07937	6.95867	10.0905	0.536109	Up	0.794761	420	EQB52438	gi|530471693|gb|EQB52438.1|	hypothetical protein CGLO_07937 [Colletotrichum gloeosporioides Cg-14]	--	--	--	GO:0097159 organic cyclic compound binding | GO:1901363 heterocyclic compound binding	GO:0016021 integral component of membrane
CGLO_02122	6.63673	19.8107	1.57773	Up	0.0797723	2298	EQB57722	gi|530478348|gb|EQB57722.1|	hypothetical protein CGLO_02122 [Colletotrichum gloeosporioides Cg-14]	bze:COCCADRAFT_72439	hypothetical protein; K16815 calcium-independent phospholipase A2-gamma	--	GO:0043531 ADP binding	--
CGLO_06314	51.9926	60.967	0.229723	Up	0.864272	2427	EQB53920	gi|530473496|gb|EQB53920.1|	voltage gated chloride channel [Colletotrichum gloeosporioides Cg-14]	maj:MAA_01156	voltage-gated chloride channel; K05012 chloride channel 3/4/5	GO:1903959 regulation of anion transmembrane transport | GO:0006879 cellular iron ion homeostasis | GO:0006821 chloride transport | GO:0006878 cellular copper ion homeostasis	GO:0005247 voltage-gated chloride channel activity	GO:0016021 integral component of membrane | GO:0005797 Golgi medial cisterna | GO:0000324 fungal-type vacuole | GO:0005768 endosome | GO:0005783 endoplasmic reticulum | GO:0005886 plasma membrane
CGLO_07910	200.087	157.126	-0.34871	Down	0.793711	1500	EQB52465	gi|530471725|gb|EQB52465.1|	NMD3 family protein [Colletotrichum gloeosporioides Cg-14]	maj:MAA_06468	nonsense-mediated mRNA decay protein 3; K07562 nonsense-mediated mRNA decay protein 3	GO:0000055 ribosomal large subunit export from nucleus	GO:0043023 ribosomal large subunit binding	GO:0022625 cytosolic large ribosomal subunit | GO:0005634 nucleus
CGLO_05176	529.869	426.155	-0.314257	Down	0.546184	2262	EQB54925	gi|530474742|gb|EQB54925.1|	hypothetical protein CGLO_05176 [Colletotrichum gloeosporioides Cg-14]	val:VDBG_07838	hypothetical protein; K06699 proteasome activator subunit 4	GO:0010952 positive regulation of peptidase activity | GO:1990237 sequestration of proteasome core complex in proteasome storage granule | GO:0010499 proteasomal ubiquitin-independent protein catabolic process | GO:1990236 proteasome core complex import into nucleus | GO:0061136 regulation of proteasomal protein catabolic process | GO:0043486 histone exchange | GO:0043248 proteasome assembly | GO…	GO:0016504 peptidase activator activity | GO:0070628 proteasome binding | GO:0070577 lysine-acetylated histone binding	GO:0005839 proteasome core complex | GO:0034515 proteasome storage granule | GO:0005634 nucleus
CGLO_02011	91.8493	75.6135	-0.280624	Down	0.804831	3837	EQB57817	gi|530478457|gb|EQB57817.1|	hypothetical protein CGLO_02011 [Colletotrichum gloeosporioides Cg-14]	dha:DEHA2C05060g	DEHA2C05060p; K06683 cell division control protein CDC15 [EC:2.7.11.1]	GO:0006468 protein phosphorylation | GO:0051301 cell division	GO:0004672 protein kinase activity | GO:0005524 ATP binding	--
CGLO_09331	102.637	38.6839	-1.40775	Down	0.0104699	1383	EQB51151	gi|530470126|gb|EQB51151.1|	hypothetical protein CGLO_09331 [Colletotrichum gloeosporioides Cg-14]	nhe:NECHADRAFT_16877	hypothetical protein; K01732 pectin lyase [EC:4.2.2.10]	GO:0000272 polysaccharide catabolic process	GO:0004553 hydrolase activity, hydrolyzing O-glycosyl compounds | GO:0030248 cellulose binding | GO:0016829 lyase activity	GO:0005576 extracellular region
CGLO_13438	347.109	155.712	-1.15651	Down	8.46e-05	663	EQB47428	gi|530465307|gb|EQB47428.1|	flavoprotein [Colletotrichum gloeosporioides Cg-14]	aor:AOR_1_2346154	AO090003001332; flavoprotein; K01598 phosphopantothenoylcysteine decarboxylase [EC:4.1.1.36]	GO:0008152 metabolic process	GO:0003824 catalytic activity	--
CGLO_08961	350.746	348.057	-0.0111044	Down	0.987042	2622	EQB51499	gi|530470542|gb|EQB51499.1|	hypothetical protein CGLO_08961 [Colletotrichum gloeosporioides Cg-14]	vda:VDAG_00503	phospholipase D2; K01115 phospholipase D1/2 [EC:3.1.4.4]	GO:0008152 metabolic process	GO:0003824 catalytic activity	--
CGLO_04635	31.0371	34.7311	0.162235	Up	0.938616	2631	EQB55439	gi|530475358|gb|EQB55439.1|	SET domain-containing protein [Colletotrichum gloeosporioides Cg-14]	nhe:NECHADRAFT_106311	SDG2102; hypothetical protein; K11423 histone-lysine N-methyltransferase SETD2 [EC:2.1.1.43]	GO:2000616 negative regulation of histone H3-K9 acetylation | GO:0006353 DNA-templated transcription, termination | GO:0016575 histone deacetylation | GO:0045128 negative regulation of reciprocal meiotic recombination | GO:0030437 ascospore formation | GO:0071441 negative regulation of histone H3-K14 acetylation | GO:0030174 regulation of DNA-dependent DNA replication initiation | GO:0006354 DNA-…	GO:0046975 histone methyltransferase activity (H3-K36 specific) | GO:0003677 DNA binding	GO:0005829 cytosol | GO:0005694 chromosome | GO:0005634 nucleus
CGLO_17893	0.331093	0.324914	-0.0271774	Down	0.979526	1863	EQB43438	gi|530460010|gb|EQB43438.1|	hypothetical protein CGLO_17893 [Colletotrichum gloeosporioides Cg-14]	--	--	--	--	--
CGLO_14043	191.29	158.051	-0.275373	Down	0.745437	3597	EQB46878	gi|530464514|gb|EQB46878.1|	endonuclease/Exonuclease/phosphatase [Colletotrichum gloeosporioides Cg-14]	gtr:GLOTRDRAFT_113896	DNase I-like protein; K20279 synaptojanin [EC:3.1.3.36]	GO:0048017 inositol lipid-mediated signaling | GO:0090305 nucleic acid phosphodiester bond hydrolysis | GO:0046856 phosphatidylinositol dephosphorylation	GO:0004527 exonuclease activity | GO:0004519 endonuclease activity	GO:0051286 cell tip | GO:0032153 cell division site | GO:0005829 cytosol
CGLO_16168	18.7516	20.6969	0.142398	Up	0.952646	861	EQB45023	gi|530462041|gb|EQB45023.1|	hypothetical protein CGLO_16168 [Colletotrichum gloeosporioides Cg-14]	ela:UCREL1_3297	putative short chain dehydrogenase reductase sdr protein; K14729 multifunctional beta-oxidation protein [EC:4.2.1.- 1.1.1.-]	GO:0055114 oxidation-reduction process	GO:0016491 oxidoreductase activity	--
CGLO_13464	1.18452	0.996219	-0.249762	Down	0.912787	459	EQB47394	gi|530465263|gb|EQB47394.1|	hypothetical protein CGLO_13464 [Colletotrichum gloeosporioides Cg-14]	--	--	--	--	--
CGLO_04391	3.88745	3.45459	-0.170312	Down	0.956398	1497	EQB55645	gi|530475610|gb|EQB55645.1|	hypothetical protein CGLO_04391 [Colletotrichum gloeosporioides Cg-14]	--	--	GO:0006355 regulation of transcription, DNA-templated	GO:0016853 isomerase activity	--
CGLO_04594	46.3097	70.4757	0.605812	Up	0.319646	1827	EQB55472	gi|530475397|gb|EQB55472.1|	hypothetical protein CGLO_04594 [Colletotrichum gloeosporioides Cg-14]	fpu:FPSE_12329	hypothetical protein; K19572 adenosine deaminase CECR1 [EC:3.5.4.4]	GO:0008152 metabolic process	GO:0019239 deaminase activity	--
CGLO_05199	705.014	793.363	0.17033	Up	0.853363	1335	EQB54914	gi|530474728|gb|EQB54914.1|	DnaJ domain-containing protein [Colletotrichum gloeosporioides Cg-14]	tmn:UCRPA7_8746	hypothetical protein; K09522 DnaJ homolog subfamily C member 2	GO:0000054 ribosomal subunit export from nucleus | GO:0006452 translational frameshifting | GO:0006364 rRNA processing | GO:0006450 regulation of translational fidelity	--	GO:0005840 ribosome | GO:0005739 mitochondrion | GO:0005730 nucleolus | GO:0005844 polysome
CGLO_03419	2.64805	4.25449	0.684056	Up	0.732684	1293	EQB56562	gi|530476706|gb|EQB56562.1|	hypothetical protein CGLO_03419 [Colletotrichum gloeosporioides Cg-14]	bsc:COCSADRAFT_22570	hypothetical protein; K10589 ubiquitin-protein ligase E3 C [EC:2.3.2.26]	--	--	--
CGLO_03783	907.235	686.226	-0.402793	Down	0.633544	2586	EQB56217	gi|530476294|gb|EQB56217.1|	phosphoribosylaminoimidazole-succinocarboxamide synthase [Colletotrichum gloeosporioides Cg-14]	--	--	--	--	GO:0016021 integral component of membrane
CGLO_11173	177.185	160.067	-0.146584	Down	0.923356	1308	EQB49489	gi|530468032|gb|EQB49489.1|	hypothetical protein CGLO_11173 [Colletotrichum gloeosporioides Cg-14]	tre:TRIREDRAFT_74103	hypothetical protein; K00799 glutathione S-transferase [EC:2.5.1.18]	GO:0008152 metabolic process	GO:0004364 glutathione transferase activity	GO:0005737 cytoplasm
CGLO_08069	339.77	261.253	-0.37911	Down	0.597331	2271	EQB52309	gi|530471540|gb|EQB52309.1|	ubiquitin fusion degradation protein [Colletotrichum gloeosporioides Cg-14]	npa:UCRNP2_7007	putative cytochrome c heme lyase protein; K01764 cytochrome c heme-lyase [EC:4.4.1.17]	GO:0006511 ubiquitin-dependent protein catabolic process	--	--
CGLO_03647	0.2796	0.306607	0.133025	Up	0.938616	1872	EQB56341	gi|530476446|gb|EQB56341.1|	flavin containing amine oxidoreductase [Colletotrichum gloeosporioides Cg-14]	--	--	GO:0055114 oxidation-reduction process	GO:0016491 oxidoreductase activity	--
CGLO_07423	9.42583	9.08726	-0.0527743	Down	0.979526	1698	EQB52912	gi|530472273|gb|EQB52912.1|	major facilitator superfamily transporter [Colletotrichum gloeosporioides Cg-14]	cmt:CCM_00881	sulfate permease 2; K14708 solute carrier family 26 (sodium-independent sulfate anion transporter), member 11	GO:0055085 transmembrane transport	--	GO:0016021 integral component of membrane
CGLO_04104	2.6557	2.3049	-0.20439	Down	0.94343	636	EQB55930	gi|530475952|gb|EQB55930.1|	hypothetical protein CGLO_04104 [Colletotrichum gloeosporioides Cg-14]	--	--	--	--	--
CGLO_09109	576.709	483.309	-0.254897	Down	0.773344	420	EQB51354	gi|302404200|ref|XP_002999938.1|	60S ribosomal protein L23 [Verticillium alfalfae VaMs.102] >gi|615447193|ref|XP_007593602.1| 60S ribosomal protein L23 [Colletotrichum fioriniae PJ7] >gi|697089345|ref|XP_009657582.1| 60S ribosomal protein L23 [Verticillium dahliae VdLs.17] >gi|261361440|gb|EEY23868.1| 60S ribosomal protein L23 [Verticillium alfalfae VaMs.102] >gi|346971967|gb|EGY15419.1| 60S ribosomal protein L23 [Verticillium d…	vda:VDAG_06273	60S ribosomal protein L23; K02894 large subunit ribosomal protein L23e	GO:0006412 translation	GO:0003735 structural constituent of ribosome	GO:0005840 ribosome
CGLO_05640	106.584	98.3783	-0.115574	Down	0.94343	573	EQB54535	gi|530474269|gb|EQB54535.1|	dopa 4,5-dioxygenase [Colletotrichum gloeosporioides Cg-14]	cmt:CCM_04826	phosphoesterase superfamily protein; K01114 phospholipase C [EC:3.1.4.3]	GO:0055114 oxidation-reduction process	GO:0051213 dioxygenase activity	GO:0016021 integral component of membrane
CGLO_06650	2.49325	1.78977	-0.478258	Down	0.853363	486	EQB53601	gi|530473114|gb|EQB53601.1|	hypothetical protein CGLO_06650 [Colletotrichum gloeosporioides Cg-14]	--	--	--	--	--
CGLO_06282	191.088	205.018	0.101508	Up	0.938616	1140	EQB53942	gi|530473527|gb|EQB53942.1|	hypothetical protein CGLO_06282 [Colletotrichum gloeosporioides Cg-14]	--	--	--	--	--
CGLO_05356	8.91955	18.815	1.07684	Up	0.308065	657	EQB54777	gi|530474577|gb|EQB54777.1|	protein tyrosine phosphatase-like protein [Colletotrichum gloeosporioides Cg-14]	pte:PTT_07276	hypothetical protein; K10703 very-long-chain (3R)-3-hydroxyacyl-CoA dehydratase [EC:4.2.1.134]	--	--	GO:0016021 integral component of membrane
CGLO_01926	173.122	207.339	0.260199	Up	0.776881	315	EQB57891	gi|596655983|ref|XP_007274134.1|	hypothetical protein CGGC5_357 [Colletotrichum gloeosporioides Nara gc5] >gi|429862071|gb|ELA36730.1| hypothetical protein CGGC5_357 [Colletotrichum gloeosporioides Nara gc5] >gi|530478546|gb|EQB57891.1| hypothetical protein CGLO_01926 [Colletotrichum gloeosporioides Cg-14]	--	--	--	--	--
CGLO_15891	507.646	427.62	-0.247493	Down	0.763426	3846	EQB45262	gi|530462338|gb|EQB45262.1|	hypothetical protein CGLO_15891 [Colletotrichum gloeosporioides Cg-14]	vda:VDAG_08568	dual specificity protein kinase pom1; K18669 dual specificity tyrosine-phosphorylation-regulated kinase 2/3/4 [EC:2.7.12.1]	GO:0006468 protein phosphorylation	GO:0004672 protein kinase activity | GO:0005524 ATP binding	--
CGLO_05227	9.4697	12.773	0.431709	Up	0.853363	1533	EQB54886	gi|530474696|gb|EQB54886.1|	SWIM zinc finger protein [Colletotrichum gloeosporioides Cg-14]	--	--	--	GO:0008270 zinc ion binding	--
CGLO_13759	140.006	171.924	0.296282	Up	0.799005	798	EQB47137	gi|530464897|gb|EQB47137.1|	hypothetical protein CGLO_13759 [Colletotrichum gloeosporioides Cg-14]	ure:UREG_05164	early meiotic induction protein 5; K20352 p24 family protein delta-1	GO:0034553 mitochondrial respiratory chain complex II assembly | GO:0030437 ascospore formation | GO:0006099 tricarboxylic acid cycle | GO:0045944 positive regulation of transcription from RNA polymerase II promoter | GO:0018293 protein-FAD linkage | GO:0006121 mitochondrial electron transport, succinate to ubiquinone	GO:0008177 succinate dehydrogenase (ubiquinone) activity	GO:0005759 mitochondrial matrix | GO:0005749 mitochondrial respiratory chain complex II, succinate dehydrogenase complex (ubiquinone)
CGLO_09338	58.3829	76.2655	0.385484	Up	0.761093	780	EQB51158	gi|596715119|ref|XP_007285160.1|	siroheme synthase [Colletotrichum gloeosporioides Nara gc5] >gi|429850488|gb|ELA25757.1| siroheme synthase [Colletotrichum gloeosporioides Nara gc5]	vda:VDAG_08219	hypothetical protein; K02304 precorrin-2 dehydrogenase / sirohydrochlorin ferrochelatase [EC:1.3.1.76 4.99.1.4]	GO:0019354 siroheme biosynthetic process | GO:0000103 sulfate assimilation | GO:0055114 oxidation-reduction process	GO:0004325 ferrochelatase activity | GO:0043115 precorrin-2 dehydrogenase activity	GO:0005634 nucleus | GO:0005829 cytosol
CGLO_10849	13.6949	7.75336	-0.820744	Down	0.528883	1602	EQB49777	gi|530468393|gb|EQB49777.1|	cytochrome P450 [Colletotrichum gloeosporioides Cg-14]	afm:AFUA_8G00220	cytochrome P450; K17827 fumitremorgin C synthase [EC:1.14.21.10]	GO:0055114 oxidation-reduction process	GO:0020037 heme binding | GO:0016705 oxidoreductase activity, acting on paired donors, with incorporation or reduction of molecular oxygen | GO:0004497 monooxygenase activity | GO:0005506 iron ion binding	--
CGLO_03531	16.5655	9.57476	-0.790876	Down	0.614654	1035	EQB56457	gi|530476581|gb|EQB56457.1|	hypothetical protein CGLO_03531 [Colletotrichum gloeosporioides Cg-14]	aor:AOR_1_60154	AO090003000032; hypothetical protein; K00108 choline dehydrogenase [EC:1.1.99.1]	--	--	GO:0016021 integral component of membrane
CGLO_14425	149.224	192.472	0.367173	Up	0.709298	1809	EQB46513	gi|530464008|gb|EQB46513.1|	dual specificity phosphatase [Colletotrichum gloeosporioides Cg-14]	bcom:BAUCODRAFT_474719	hypothetical protein; K01110 phosphatidylinositol-3,4,5-trisphosphate 3-phosphatase and dual-specificity protein phosphatase PTEN [EC:3.1.3.16 3.1.3.48 3.1.3.67]	GO:0035335 peptidyl-tyrosine dephosphorylation | GO:0009992 cellular water homeostasis | GO:0046488 phosphatidylinositol metabolic process | GO:0007033 vacuole organization | GO:0030476 ascospore wall assembly | GO:0007165 signal transduction	GO:0004725 protein tyrosine phosphatase activity | GO:0008138 protein tyrosine/serine/threonine phosphatase activity | GO:0016314 phosphatidylinositol-3,4,5-trisphosphate 3-phosphatase activity	GO:0005829 cytosol | GO:0005739 mitochondrion
CGLO_06334	2.06761	2.85683	0.46645	Up	0.853363	1086	EQB53889	gi|530473459|gb|EQB53889.1|	hypothetical protein CGLO_06334 [Colletotrichum gloeosporioides Cg-14]	nhe:NECHADRAFT_71446	hypothetical protein; K09423 Myb-like DNA-binding protein BAS1	GO:0007131 reciprocal meiotic recombination | GO:0000105 histidine biosynthetic process | GO:0045944 positive regulation of transcription from RNA polymerase II promoter | GO:0009113 purine nucleobase biosynthetic process	GO:0001046 core promoter sequence-specific DNA binding | GO:0001135 transcription factor activity, RNA polymerase II transcription factor recruiting | GO:0000981 RNA polymerase II transcription factor activity, sequence-specific DNA binding	GO:0016021 integral component of membrane | GO:0005634 nucleus
CGLO_06984	100.235	91.8768	-0.125618	Down	0.932441	447	EQB53306	gi|596689197|ref|XP_007280387.1|	cell cycle control protein cwf14 [Colletotrichum gloeosporioides Nara gc5] >gi|429855588|gb|ELA30537.1| cell cycle control protein cwf14 [Colletotrichum gloeosporioides Nara gc5]	vda:VDAG_05945	cell cycle control protein cwf14; K12873 bud site selection protein 31	GO:0045292 mRNA cis splicing, via spliceosome | GO:0000282 cellular bud site selection	--	GO:0005686 U2 snRNP | GO:0005684 U2-type spliceosomal complex
CGLO_15658	40.4639	49.1083	0.27933	Up	0.897346	960	EQB45470	gi|530462606|gb|EQB45470.1|	hypothetical protein CGLO_15658 [Colletotrichum gloeosporioides Cg-14]	--	--	--	--	--
CGLO_10217	2.90656	2.9401	0.0165536	Up	0.991512	1758	EQB50348	gi|530469121|gb|EQB50348.1|	hypothetical protein CGLO_10217 [Colletotrichum gloeosporioides Cg-14]	fme:FOMMEDRAFT_107452	cytochrome P450 oxidoreductase OrdA-like protein; K14338 cytochrome P450 / NADPH-cytochrome P450 reductase [EC:1.14.14.1 1.6.2.4]	GO:0055114 oxidation-reduction process	GO:0020037 heme binding | GO:0016705 oxidoreductase activity, acting on paired donors, with incorporation or reduction of molecular oxygen | GO:0004497 monooxygenase activity | GO:0005506 iron ion binding	GO:0016021 integral component of membrane
CGLO_00442	18.4648	8.61055	-1.1006	Down	0.290099	843	EQB59200	gi|530480141|gb|EQB59200.1|	hypothetical protein CGLO_00442 [Colletotrichum gloeosporioides Cg-14]	tmn:UCRPA7_2613	putative tetrahydroxynaphthalene reductase protein; K17739 tetrahydroxynaphthalene reductase [EC:1.1.1.252]	GO:0055114 oxidation-reduction process	GO:0016491 oxidoreductase activity	--
CGLO_06376	261.954	309.975	0.242835	Up	0.842147	984	EQB53859	gi|530473419|gb|EQB53859.1|	hypothetical protein CGLO_06376 [Colletotrichum gloeosporioides Cg-14]	--	--	--	--	--
CGLO_08250	366.884	313.726	-0.225816	Down	0.74163	1170	EQB52140	gi|530471345|gb|EQB52140.1|	S-methyl-5-thioribose-1-phosphate isomerase [Colletotrichum gloeosporioides Cg-14]	fgr:FGSG_05053	hypothetical protein; K08963 methylthioribose-1-phosphate isomerase [EC:5.3.1.23]	GO:0019509 L-methionine biosynthetic process from methylthioadenosine | GO:0019284 L-methionine biosynthetic process from S-adenosylmethionine	GO:0046523 S-methyl-5-thioribose-1-phosphate isomerase activity	GO:0005737 cytoplasm | GO:0005634 nucleus
CGLO_05796	25.2432	57.9629	1.19924	Up	0.287086	861	EQB54383	gi|530474082|gb|EQB54383.1|	hypothetical protein CGLO_05796 [Colletotrichum gloeosporioides Cg-14]	--	--	GO:0032259 methylation	GO:0008168 methyltransferase activity	--
CGLO_05736	222.738	315.793	0.503632	Up	0.362939	1314	EQB54431	gi|530474141|gb|EQB54431.1|	hypothetical protein CGLO_05736 [Colletotrichum gloeosporioides Cg-14]	vda:VDAG_08314	Ebp2p; K14823 rRNA-processing protein EBP2	GO:0000280 nuclear division | GO:0006364 rRNA processing	--	GO:0005730 nucleolus | GO:0030687 preribosome, large subunit precursor | GO:0034399 nuclear periphery
CGLO_10187	0.189351	0.175782	-0.107279	Down	0.94343	564	EQB50382	gi|530469160|gb|EQB50382.1|	hypothetical protein CGLO_10187 [Colletotrichum gloeosporioides Cg-14]	--	--	GO:0008152 metabolic process	GO:0016787 hydrolase activity	GO:0016021 integral component of membrane
CGLO_12441	2.55366	3.34607	0.389905	Up	0.88857	423	EQB48331	gi|530466542|gb|EQB48331.1|	hypothetical protein CGLO_12441 [Colletotrichum gloeosporioides Cg-14]	--	--	--	--	--
CGLO_17250	17.7674	45.3309	1.35126	Up	0.155114	1536	EQB44036	gi|530460778|gb|EQB44036.1|	cytochrome P450 [Colletotrichum gloeosporioides Cg-14]	nfi:NFIA_093700	benzoate 4-monooxygenase cytochrome P450; K17475 tryprostatin B 6-hydroxylase [EC:1.14.13.176]	GO:0055114 oxidation-reduction process	GO:0020037 heme binding | GO:0016705 oxidoreductase activity, acting on paired donors, with incorporation or reduction of molecular oxygen | GO:0004497 monooxygenase activity | GO:0005506 iron ion binding	GO:0016021 integral component of membrane
CGLO_07085	359.174	355.334	-0.0155071	Down	0.985355	582	EQB53219	gi|530472651|gb|EQB53219.1|	hypothetical protein CGLO_07085 [Colletotrichum gloeosporioides Cg-14]	vda:VDAG_02613	GTP cyclohydrolase-2; K01497 GTP cyclohydrolase II [EC:3.5.4.25]	GO:0009231 riboflavin biosynthetic process	GO:0042802 identical protein binding | GO:0003935 GTP cyclohydrolase II activity	--
CGLO_16841	1492.04	1582.6	0.085016	Up	0.927665	1518	EQB44411	gi|596654437|ref|XP_007273837.1|	vacuolar ATP synthase subunit b [Colletotrichum gloeosporioides Nara gc5] >gi|429862492|gb|ELA37140.1| vacuolar ATP synthase subunit b [Colletotrichum gloeosporioides Nara gc5]	vda:VDAG_01988	vacuolar ATP synthase subunit B; K02147 V-type H+-transporting ATPase subunit B	GO:1902906 proteasome storage granule assembly | GO:0046034 ATP metabolic process | GO:0006874 cellular calcium ion homeostasis | GO:0015991 ATP hydrolysis coupled proton transport | GO:0007035 vacuolar acidification	GO:0046961 proton-transporting ATPase activity, rotational mechanism | GO:0005524 ATP binding	GO:0000329 fungal-type vacuole membrane | GO:0000221 vacuolar proton-transporting V-type ATPase, V1 domain
CGLO_08625	121.021	123.755	0.0322265	Up	0.979526	1329	EQB51787	gi|530470897|gb|EQB51787.1|	threonyl and Alanyl tRNA synthetase second additional domain-containing protein [Colletotrichum gloeosporioides Cg-14]	nhe:NECHADRAFT_86981	hypothetical protein; K07050 misacylated tRNA(Ala) deacylase [EC:3.1.1.-]	GO:0006419 alanyl-tRNA aminoacylation | GO:0006450 regulation of translational fidelity	GO:0003676 nucleic acid binding | GO:0004813 alanine-tRNA ligase activity | GO:0002196 Ser-tRNA(Ala) hydrolase activity | GO:0005524 ATP binding	--
CGLO_02035	536.305	129.459	-2.05055	Down	1.22e-05	1176	EQB57798	gi|530478433|gb|EQB57798.1|	integral membrane protein [Colletotrichum gloeosporioides Cg-14]	ani:AN9039.2	hypothetical protein; K01613 phosphatidylserine decarboxylase [EC:4.1.1.65]	--	--	GO:0016021 integral component of membrane
CGLO_12549	1.2172	1.56257	0.360352	Up	0.885976	1500	EQB48240	gi|530466419|gb|EQB48240.1|	hypothetical protein CGLO_12549 [Colletotrichum gloeosporioides Cg-14]	cthr:CTHT_0020850	putative extracellular protein; K06113 arabinan endo-1,5-alpha-L-arabinosidase [EC:3.2.1.99]	GO:0055114 oxidation-reduction process	GO:0020037 heme binding | GO:0016705 oxidoreductase activity, acting on paired donors, with incorporation or reduction of molecular oxygen | GO:0004497 monooxygenase activity | GO:0005506 iron ion binding	--
CGLO_05667	786.573	798.237	0.0212367	Up	0.979526	1125	EQB54483	gi|530474210|gb|EQB54483.1|	galactose-1-phosphate uridylyltransferase [Colletotrichum gloeosporioides Cg-14]	vda:VDAG_00745	galactose-1-phosphate uridylyltransferase; K00965 UDPglucose--hexose-1-phosphate uridylyltransferase [EC:2.7.7.12]	GO:0033499 galactose catabolic process via UDP-galactose | GO:0052574 UDP-D-galactose biosynthetic process | GO:0042125 protein galactosylation	GO:0008270 zinc ion binding | GO:0008108 UDP-glucose:hexose-1-phosphate uridylyltransferase activity	GO:0005829 cytosol | GO:0005634 nucleus
CGLO_09419	1759.6	1965.27	0.159484	Up	0.853363	489	EQB51075	gi|596721236|ref|XP_007286273.1|	eukaryotic translation initiation factor 5a-2 [Colletotrichum gloeosporioides Nara gc5] >gi|429849271|gb|ELA24674.1| eukaryotic translation initiation factor 5a-2 [Colletotrichum gloeosporioides Nara gc5]	tmn:UCRPA7_7941	putative eukaryotic translation initiation factor 5a-2 protein; K03263 translation initiation factor 5A	GO:0006413 translational initiation | GO:0006452 translational frameshifting | GO:0045905 positive regulation of translational termination | GO:0045901 positive regulation of translational elongation	GO:0003743 translation initiation factor activity | GO:0003746 translation elongation factor activity | GO:0043022 ribosome binding	--
CGLO_06289	106.286	53.576	-0.988292	Down	0.258163	882	EQB53940	gi|530473524|gb|EQB53940.1|	hypothetical protein CGLO_06289 [Colletotrichum gloeosporioides Cg-14]	--	--	GO:0006355 regulation of transcription, DNA-templated	GO:0003700 transcription factor activity, sequence-specific DNA binding | GO:0003676 nucleic acid binding	GO:0005634 nucleus
CGLO_07888	0.373852	0.328316	-0.18738	Down	0.902858	291	EQB52482	gi|530471746|gb|EQB52482.1|	hypothetical protein CGLO_07888 [Colletotrichum gloeosporioides Cg-14]	--	--	--	--	--
CGLO_06309	157.774	167.019	0.0821519	Up	0.94343	2082	EQB53915	gi|530473491|gb|EQB53915.1|	molybdenum cofactor synthesis domain-containing protein [Colletotrichum gloeosporioides Cg-14]	vda:VDAG_00387	gephyrin; K15376 gephyrin [EC:2.10.1.1 2.7.7.75]	GO:0006777 Mo-molybdopterin cofactor biosynthetic process	--	--
CGLO_11600	182.61	149.771	-0.286009	Down	0.854243	1464	EQB49091	gi|530467525|gb|EQB49091.1|	arrestin [Colletotrichum gloeosporioides Cg-14]	--	--	--	--	--
CGLO_02772	0.536413	0.636002	0.245686	Up	0.869833	1023	EQB57135	gi|530477621|gb|EQB57135.1|	alcohol dehydrogenase GroES-like domain-containing protein [Colletotrichum gloeosporioides Cg-14]	lel:LELG_04799	hypothetical protein; K00002 alcohol dehydrogenase (NADP+) [EC:1.1.1.2]	GO:0055114 oxidation-reduction process	GO:0008270 zinc ion binding | GO:0016491 oxidoreductase activity	--
CGLO_09780	33.4989	31.1493	-0.104913	Down	0.966181	3144	EQB50751	gi|530469638|gb|EQB50751.1|	hypothetical protein CGLO_09780 [Colletotrichum gloeosporioides Cg-14]	--	--	GO:0000819 sister chromatid segregation | GO:0051641 cellular localization | GO:0030702 chromatin silencing at centromere | GO:0045132 meiotic chromosome segregation | GO:0031060 regulation of histone methylation | GO:0070192 chromosome organization involved in meiotic cell cycle | GO:0034968 histone lysine methylation	--	GO:0031981 nuclear lumen | GO:0032991 macromolecular complex | GO:0000775 chromosome, centromeric region
CGLO_13075	17.6153	12.7258	-0.469064	Down	0.784126	1026	EQB47753	gi|530465771|gb|EQB47753.1|	serine carboxypeptidase S28 [Colletotrichum gloeosporioides Cg-14]	--	--	GO:0006508 proteolysis	GO:0004180 carboxypeptidase activity | GO:0008236 serine-type peptidase activity	--
CGLO_17319	16.4587	17.2112	0.0645	Up	0.972856	1257	EQB43986	gi|530460708|gb|EQB43986.1|	hypothetical protein CGLO_17319 [Colletotrichum gloeosporioides Cg-14]	--	--	--	--	--
CGLO_09603	498.561	373.287	-0.417486	Down	0.567707	1947	EQB50903	gi|530469823|gb|EQB50903.1|	tetratricopeptide [Colletotrichum gloeosporioides Cg-14]	nhe:NECHADRAFT_57284	hypothetical protein; K13342 peroxin-5	--	--	GO:0005777 peroxisome
CGLO_05138	341.918	506.857	0.567929	Up	0.263462	882	EQB54971	gi|530474796|gb|EQB54971.1|	von Willebrand factor type A domain-containing protein [Colletotrichum gloeosporioides Cg-14]	bfu:BC1G_12408	26S proteasome regulatory subunit S5A, multiubiquitin chain binding protein; K03029 26S proteasome regulatory subunit N10	GO:0045842 positive regulation of mitotic metaphase/anaphase transition	GO:0036435 K48-linked polyubiquitin binding | GO:0005198 structural molecule activity	GO:0005829 cytosol | GO:0008540 proteasome regulatory particle, base subcomplex | GO:0005634 nucleus
CGLO_16602	198.589	149.513	-0.409522	Down	0.533827	396	EQB44630	gi|530461545|gb|EQB44630.1|	ribosomal L32p family protein [Colletotrichum gloeosporioides Cg-14]	val:VDBG_05520	hypothetical protein; K02911 large subunit ribosomal protein L32	GO:0006412 translation	GO:0003735 structural constituent of ribosome	GO:0015934 large ribosomal subunit
CGLO_12599	579.812	1252.13	1.11073	Up	0.0178479	1500	EQB48189	gi|530466343|gb|EQB48189.1|	hypothetical protein CGLO_12599 [Colletotrichum gloeosporioides Cg-14]	ani:AN3929.2	hypothetical protein; K11369 retrograde regulation protein 2	GO:0055085 transmembrane transport	--	GO:0016021 integral component of membrane
CGLO_12650	0.61226	0.687405	0.167017	Up	0.939537	1488	EQB48146	gi|530466289|gb|EQB48146.1|	hypothetical protein CGLO_12650 [Colletotrichum gloeosporioides Cg-14]	--	--	--	--	--
CGLO_17421	163.949	128.301	-0.353711	Down	0.721013	1665	EQB43884	gi|530460587|gb|EQB43884.1|	major facilitator superfamily transporter [Colletotrichum gloeosporioides Cg-14]	cthr:CTHT_0033850	hypothetical protein; K16066 3-hydroxy acid dehydrogenase / malonic semialdehyde reductase [EC:1.1.1.381 1.1.1.-]	GO:0055085 transmembrane transport	--	GO:0016021 integral component of membrane
CGLO_08602	443.867	334.844	-0.406636	Down	0.33295	2424	EQB51823	gi|530470941|gb|EQB51823.1|	hypothetical protein CGLO_08602 [Colletotrichum gloeosporioides Cg-14]	aor:AOR_1_1280054	AO090011000758; hypothetical protein; K20823 N-alpha-acetyltransferase 35, NatC auxiliary subunit	GO:0006357 regulation of transcription from RNA polymerase II promoter	GO:0008270 zinc ion binding | GO:0000981 RNA polymerase II transcription factor activity, sequence-specific DNA binding | GO:0003677 DNA binding	GO:0005634 nucleus
CGLO_02142	701.109	676.41	-0.05174	Down	0.954939	1164	EQB57698	gi|530478321|gb|EQB57698.1|	hypothetical protein CGLO_02142 [Colletotrichum gloeosporioides Cg-14]	mgl:MGL_2282	hypothetical protein; K02938 large subunit ribosomal protein L8e	GO:0032543 mitochondrial translation	GO:0003723 RNA binding | GO:0003735 structural constituent of ribosome | GO:0016740 transferase activity	GO:0005762 mitochondrial large ribosomal subunit
CGLO_05987	672.926	470.663	-0.515754	Down	0.12425	753	EQB54206	gi|530473860|gb|EQB54206.1|	tyrosine/serine protein phosphatase [Colletotrichum gloeosporioides Cg-14]	afm:AFUA_6G06650	tyrosine/serine protein phosphatase; K01104 protein-tyrosine phosphatase [EC:3.1.3.48]	GO:0035335 peptidyl-tyrosine dephosphorylation	GO:0004725 protein tyrosine phosphatase activity	--
CGLO_15574	5.44086	4.21952	-0.366756	Down	0.902858	1848	EQB45537	gi|530462690|gb|EQB45537.1|	fungal trichothecene efflux pump [Colletotrichum gloeosporioides Cg-14]	nhe:NECHADRAFT_65858	hypothetical protein; K10866 DNA repair protein RAD50 [EC:3.6.-.-]	GO:0055085 transmembrane transport	GO:0005215 transporter activity	GO:0016021 integral component of membrane
CGLO_17122	0.143864	0.14924	0.0529239	Up	0.966181	1962	EQB44158	gi|530460933|gb|EQB44158.1|	hypothetical protein CGLO_17122 [Colletotrichum gloeosporioides Cg-14]	--	--	--	--	GO:0016021 integral component of membrane
CGLO_03545	889.856	688.541	-0.37003	Down	0.408962	1506	EQB56444	gi|530476567|gb|EQB56444.1|	hypothetical protein CGLO_03545 [Colletotrichum gloeosporioides Cg-14]	vda:VDAG_04599	E3 ubiquitin-protein ligase HRD1; K10601 E3 ubiquitin-protein ligase synoviolin [EC:2.3.2.27]	GO:0016567 protein ubiquitination | GO:0030433 ER-associated ubiquitin-dependent protein catabolic process	GO:0008270 zinc ion binding | GO:0061630 ubiquitin protein ligase activity	GO:0000836 Hrd1p ubiquitin ligase complex
CGLO_02103	80.035	116.495	0.541562	Up	0.621807	1560	EQB57743	gi|530478370|gb|EQB57743.1|	hypothetical protein CGLO_02103 [Colletotrichum gloeosporioides Cg-14]	afv:AFLA_097500	Diacylglycerol acyltransferase family; K14458 2-acylglycerol O-acyltransferase 1 [EC:2.3.1.22]	GO:0008152 metabolic process	GO:0016758 transferase activity, transferring hexosyl groups	--
CGLO_17499	0.676939	0.663174	-0.029637	Down	0.980094	1737	EQB43794	gi|530460482|gb|EQB43794.1|	sulfatase [Colletotrichum gloeosporioides Cg-14]	afm:AFUA_8G02520	arylsulfatase; K01130 arylsulfatase [EC:3.1.6.1]	GO:0018958 phenol-containing compound metabolic process	GO:0004065 arylsulfatase activity	--
CGLO_05860	0.538185	0.497005	-0.114841	Down	0.94343	3837	EQB54322	gi|530474006|gb|EQB54322.1|	hypothetical protein CGLO_05860 [Colletotrichum gloeosporioides Cg-14]	pfj:MYCFIDRAFT_130964	hypothetical protein; K15505 DNA repair protein RAD5 [EC:3.6.4.-]	--	GO:0005524 ATP binding | GO:0008270 zinc ion binding	--
CGLO_14008	526.26	642.747	0.288475	Up	0.674165	756	EQB46908	gi|596707133|ref|XP_007283695.1|	proteasome subunit alpha type-4 [Colletotrichum gloeosporioides Nara gc5] >gi|429852095|gb|ELA27246.1| proteasome subunit alpha type-4 [Colletotrichum gloeosporioides Nara gc5]	val:VDBG_10007	proteasome subunit alpha type-4; K02728 20S proteasome subunit alpha 3 [EC:3.4.25.1]	GO:0010499 proteasomal ubiquitin-independent protein catabolic process | GO:0080129 proteasome core complex assembly | GO:0045842 positive regulation of mitotic metaphase/anaphase transition	GO:0004298 threonine-type endopeptidase activity	GO:0042175 nuclear outer membrane-endoplasmic reticulum membrane network | GO:0034515 proteasome storage granule | GO:0019773 proteasome core complex, alpha-subunit complex | GO:0005634 nucleus
CGLO_05628	2.76308	5.60715	1.02099	Up	0.463039	2928	EQB54523	gi|530474257|gb|EQB54523.1|	hypothetical protein CGLO_05628 [Colletotrichum gloeosporioides Cg-14]	--	--	GO:0030001 metal ion transport | GO:0055085 transmembrane transport	GO:0046873 metal ion transmembrane transporter activity	GO:0016021 integral component of membrane
CGLO_04162	0.967054	0.788365	-0.294733	Down	0.847889	423	EQB55858	gi|530475864|gb|EQB55858.1|	epoxide hydrolase [Colletotrichum gloeosporioides Cg-14]	ang:ANI_1_312144	An16g02170; epoxide hydrolase; K01253 microsomal epoxide hydrolase [EC:3.3.2.9]	GO:0008152 metabolic process	GO:0016787 hydrolase activity	--
CGLO_16871	272.522	238.959	-0.189608	Down	0.853363	1794	EQB44385	gi|530461224|gb|EQB44385.1|	hypothetical protein CGLO_16871 [Colletotrichum gloeosporioides Cg-14]	--	--	GO:0006355 regulation of transcription, DNA-templated	GO:0043565 sequence-specific DNA binding	GO:0005634 nucleus
CGLO_08302	17.0009	52.201	1.61847	Up	0.0015625	867	EQB52097	gi|530471282|gb|EQB52097.1|	hypothetical protein CGLO_08302 [Colletotrichum gloeosporioides Cg-14]	--	--	--	--	--
CGLO_04228	66.5553	54.9991	-0.275147	Down	0.885896	1473	EQB55813	gi|530475803|gb|EQB55813.1|	hypothetical protein CGLO_04228 [Colletotrichum gloeosporioides Cg-14]	pno:SNOG_14795	hypothetical protein; K10436 microtubule-associated protein, RP/EB family	--	--	GO:0016021 integral component of membrane
CGLO_16483	73.3451	48.9016	-0.584819	Down	0.388231	1824	EQB44736	gi|530461676|gb|EQB44736.1|	hypothetical protein CGLO_16483 [Colletotrichum gloeosporioides Cg-14]	aor:AOR_1_1498014	AO090026000835; ARF GTPase activator (Csx2); K12488 Arf-GAP with SH3 domain, ANK repeat and PH domain-containing protein	--	GO:0000166 nucleotide binding | GO:0003723 RNA binding	--
CGLO_06589	17.4098	16.6372	-0.0654907	Down	0.972363	1545	EQB53674	gi|530473199|gb|EQB53674.1|	unsaturated glucuronyl hydrolase [Colletotrichum gloeosporioides Cg-14]	--	--	GO:0008152 metabolic process	GO:0016787 hydrolase activity	--
CGLO_04528	232.541	227.45	-0.0319392	Down	0.968093	1758	EQB55532	gi|530475471|gb|EQB55532.1|	KH domain-containing protein [Colletotrichum gloeosporioides Cg-14]	tre:TRIREDRAFT_110487	hypothetical protein; K13210 far upstream element-binding protein	--	GO:0003723 RNA binding	--
CGLO_13772	4420.39	1041.52	-2.08548	Down	0.000477931	1395	EQB47118	gi|530464870|gb|EQB47118.1|	homogentisate 1,2-dioxygenase [Colletotrichum gloeosporioides Cg-14]	val:VDBG_09257	homogentisate 1,2-dioxygenase; K00451 homogentisate 1,2-dioxygenase [EC:1.13.11.5]	GO:0006559 L-phenylalanine catabolic process | GO:0055114 oxidation-reduction process | GO:0006570 tyrosine metabolic process	GO:0004411 homogentisate 1,2-dioxygenase activity	--
CGLO_04439	11.1496	63.386	2.50718	Up	0.00136299	1506	EQB55607	gi|530475566|gb|EQB55607.1|	hypothetical protein CGLO_04439 [Colletotrichum gloeosporioides Cg-14]	ela:UCREL1_8805	putative general substrate transporter protein; K01487 guanine deaminase [EC:3.5.4.3]	GO:0055085 transmembrane transport | GO:0008643 carbohydrate transport	GO:0022891 substrate-specific transmembrane transporter activity	GO:0016021 integral component of membrane
CGLO_12928	110.701	107.874	-0.0373162	Down	0.972856	2613	EQB47888	gi|530465944|gb|EQB47888.1|	MCM2/3/5 family protein [Colletotrichum gloeosporioides Cg-14]	vda:VDAG_01493	DNA replication licensing factor mcm2; K02540 DNA replication licensing factor MCM2 [EC:3.6.4.12]	GO:0032508 DNA duplex unwinding | GO:0006267 pre-replicative complex assembly involved in nuclear cell cycle DNA replication | GO:1902450 negative regulation of ATP-dependent DNA helicase activity | GO:0000727 double-strand break repair via break-induced replication | GO:0006270 DNA replication initiation | GO:0006271 DNA strand elongation involved in DNA replication	GO:0003697 single-stranded DNA binding | GO:0003688 DNA replication origin binding | GO:0003682 chromatin binding | GO:0005524 ATP binding | GO:0003678 DNA helicase activity	GO:0005656 nuclear pre-replicative complex | GO:0005737 cytoplasm | GO:0031261 DNA replication preinitiation complex | GO:0042555 MCM complex | GO:0031298 replication fork protection complex
CGLO_16719	623.899	585.525	-0.0915797	Down	0.92673	825	EQB44527	gi|530461408|gb|EQB44527.1|	superoxide dismutase [Colletotrichum gloeosporioides Cg-14]	vda:VDAG_04174	superoxide dismutase; K04564 superoxide dismutase, Fe-Mn family [EC:1.15.1.1]	GO:0055114 oxidation-reduction process | GO:0032543 mitochondrial translation | GO:0019430 removal of superoxide radicals	GO:0046872 metal ion binding | GO:0003735 structural constituent of ribosome | GO:0004784 superoxide dismutase activity	GO:0005763 mitochondrial small ribosomal subunit
CGLO_01024	867.403	795.935	-0.124051	Down	0.944334	1023	EQB58694	gi|530479519|gb|EQB58694.1|	hypothetical protein CGLO_01024 [Colletotrichum gloeosporioides Cg-14]	pte:PTT_18581	hypothetical protein; K13333 lysophospholipase [EC:3.1.1.5]	GO:0008152 metabolic process	GO:0016787 hydrolase activity	--
CGLO_11259	3.89663	4.95438	0.34648	Up	0.902858	1887	EQB49418	gi|530467931|gb|EQB49418.1|	GMC oxidoreductase [Colletotrichum gloeosporioides Cg-14]	mpr:MPER_12409	hypothetical protein ; K00108 choline dehydrogenase [EC:1.1.99.1]	GO:0055114 oxidation-reduction process	GO:0050660 flavin adenine dinucleotide binding | GO:0016614 oxidoreductase activity, acting on CH-OH group of donors	--
CGLO_08281	679.658	1266.69	0.89818	Up	0.044622	900	EQB52120	gi|530471313|gb|EQB52120.1|	hypothetical protein CGLO_08281 [Colletotrichum gloeosporioides Cg-14]	ani:AN7623.2	hypothetical protein; K12274 translocation protein SEC72	--	--	GO:0016021 integral component of membrane
CGLO_08634	1.15824	0.937937	-0.304376	Down	0.902858	1398	EQB51796	gi|530470906|gb|EQB51796.1|	hypothetical protein CGLO_08634 [Colletotrichum gloeosporioides Cg-14]	ttt:THITE_72629	glycoside hydrolase family 5 protein; K01179 endoglucanase [EC:3.2.1.4]	GO:0005975 carbohydrate metabolic process	GO:0004553 hydrolase activity, hydrolyzing O-glycosyl compounds | GO:0030248 cellulose binding	GO:0005576 extracellular region
CGLO_01386	445.957	507.232	0.185742	Up	0.830277	3963	EQB58373	gi|530479122|gb|EQB58373.1|	hypothetical protein CGLO_01386 [Colletotrichum gloeosporioides Cg-14]	val:VDBG_08588	cation-transporting ATPase; K14950 cation-transporting ATPase 13A1 [EC:3.6.3.-]	GO:0055092 sterol homeostasis | GO:0030026 cellular manganese ion homeostasis | GO:0006874 cellular calcium ion homeostasis | GO:0008152 metabolic process | GO:0034220 ion transmembrane transport | GO:0006812 cation transport	GO:0046872 metal ion binding | GO:0015662 ATPase activity, coupled to transmembrane movement of ions, phosphorylative mechanism | GO:0005524 ATP binding	GO:0016021 integral component of membrane | GO:0005801 cis-Golgi network | GO:0005789 endoplasmic reticulum membrane
CGLO_16517	16.161	9.09457	-0.829436	Down	0.502818	969	EQB44704	gi|530461636|gb|EQB44704.1|	hypothetical protein CGLO_16517 [Colletotrichum gloeosporioides Cg-14]	val:VDBG_07133	tRNA (uracil-5-)-methyltransferase TRM9; K15444 tRNA (uracil-5-)-methyltransferase TRM9 [EC:2.1.1.229]	GO:0030488 tRNA methylation | GO:0035690 cellular response to drug | GO:0001300 chronological cell aging | GO:0002098 tRNA wobble uridine modification	GO:0016300 tRNA (uracil) methyltransferase activity	GO:0005737 cytoplasm | GO:0005634 nucleus
CGLO_03150	16.2914	19.8315	0.283681	Up	0.896407	1251	EQB56804	gi|530477199|gb|EQB56804.1|	hypothetical protein CGLO_03150 [Colletotrichum gloeosporioides Cg-14]	--	--	GO:0016311 dephosphorylation	GO:0016791 phosphatase activity	--
CGLO_10377	291.737	240.99	-0.275691	Down	0.771693	1533	EQB50199	gi|530468946|gb|EQB50199.1|	diphthamide biosynthesis protein 2 [Colletotrichum gloeosporioides Cg-14]	vda:VDAG_06726	diphthamide biosynthesis protein; K17866 diphthamide biosynthesis protein 2	GO:0017183 peptidyl-diphthamide biosynthetic process from peptidyl-histidine	--	GO:0016021 integral component of membrane
CGLO_11312	0.2796	0.306607	0.133025	Up	0.938616	3675	EQB49353	gi|530467849|gb|EQB49353.1|	subtilase [Colletotrichum gloeosporioides Cg-14]	pgu:PGUG_00804	hypothetical protein; K14644 subtilase-type proteinase RRT12 [EC:3.4.21.-]	GO:0006508 proteolysis	GO:0004252 serine-type endopeptidase activity	GO:0016020 membrane | GO:0005618 cell wall
CGLO_11869	24.0247	19.9314	-0.269476	Down	0.902858	762	EQB48856	gi|530467202|gb|EQB48856.1|	hypothetical protein CGLO_11869 [Colletotrichum gloeosporioides Cg-14]	--	--	--	--	--
CGLO_14349	393.697	145.653	-1.43455	Down	1.07e-06	2151	EQB46590	gi|530464112|gb|EQB46590.1|	hypothetical protein CGLO_14349 [Colletotrichum gloeosporioides Cg-14]	cgr:CAGL0L09691g	hypothetical protein; K09248 proline utilization trans-activator	GO:0000972 transcription-dependent tethering of RNA polymerase II gene DNA at nuclear periphery | GO:2001158 positive regulation of proline catabolic process to glutamate | GO:0045944 positive regulation of transcription from RNA polymerase II promoter	GO:0008270 zinc ion binding | GO:0001077 transcriptional activator activity, RNA polymerase II core promoter proximal region sequence-specific binding | GO:0000978 RNA polymerase II core promoter proximal region sequence-specific DNA binding	GO:0005634 nucleus
CGLO_13703	81.7183	157.966	0.95088	Up	0.0778306	315	EQB47179	gi|530464963|gb|EQB47179.1|	phosphoglycerate dehydrogenase [Colletotrichum gloeosporioides Cg-14]	tre:TRIREDRAFT_80003	hypothetical protein; K00058 D-3-phosphoglycerate dehydrogenase [EC:1.1.1.95]	GO:0006564 L-serine biosynthetic process | GO:0055114 oxidation-reduction process	GO:0051287 NAD binding | GO:0004617 phosphoglycerate dehydrogenase activity | GO:0016597 amino acid binding	--
CGLO_01073	188.238	95.4651	-0.979511	Down	0.135442	1029	EQB58655	gi|530479473|gb|EQB58655.1|	hypothetical protein CGLO_01073 [Colletotrichum gloeosporioides Cg-14]	--	--	--	--	--
CGLO_12006	156.27	125.507	-0.31627	Down	0.799548	549	EQB48742	gi|530467045|gb|EQB48742.1|	hypothetical protein CGLO_12006 [Colletotrichum gloeosporioides Cg-14]	cmt:CCM_05895	glucokinase; K00851 gluconokinase [EC:2.7.1.12]	GO:0016310 phosphorylation | GO:0005975 carbohydrate metabolic process	GO:0016301 kinase activity	--
CGLO_02149	2.14763	3.79647	0.821916	Up	0.611626	1686	EQB57690	gi|530478312|gb|EQB57690.1|	carboxylesterase [Colletotrichum gloeosporioides Cg-14]	mgr:MGG_02130	lipase 2; K01046 triacylglycerol lipase [EC:3.1.1.3]	GO:0008152 metabolic process	GO:0016787 hydrolase activity	--
CGLO_00756	192.127	151.156	-0.346024	Down	0.752608	1821	EQB58940	gi|530479818|gb|EQB58940.1|	UV radiation resistance-associated protein [Colletotrichum gloeosporioides Cg-14]	tmn:UCRPA7_8607	putative uv radiation resistance protein; K21249 UV radiation resistance-associated gene protein	GO:0010508 positive regulation of autophagy	--	GO:0005829 cytosol
CGLO_02681	10.0781	6.50975	-0.630554	Down	0.761653	1794	EQB57212	gi|530477718|gb|EQB57212.1|	carboxylesterase [Colletotrichum gloeosporioides Cg-14]	cput:CONPUDRAFT_145475	alpha beta-hydrolase; K02332 DNA polymerase gamma 1 [EC:2.7.7.7]	GO:0008152 metabolic process	GO:0016787 hydrolase activity	--
CGLO_07211	13.5969	8.38588	-0.697248	Down	0.707467	2040	EQB53106	gi|530472509|gb|EQB53106.1|	GMC oxidoreductase [Colletotrichum gloeosporioides Cg-14]	aor:AOR_1_60154	AO090003000032; hypothetical protein; K00108 choline dehydrogenase [EC:1.1.99.1]	GO:0055114 oxidation-reduction process	GO:0050660 flavin adenine dinucleotide binding | GO:0016614 oxidoreductase activity, acting on CH-OH group of donors	--
CGLO_15722	19.219	6.68834	-1.52282	Down	0.0679684	525	EQB45405	gi|530462524|gb|EQB45405.1|	hypothetical protein CGLO_15722 [Colletotrichum gloeosporioides Cg-14]	--	--	GO:0055114 oxidation-reduction process	GO:0008270 zinc ion binding | GO:0016491 oxidoreductase activity	--
CGLO_02797	3894.86	4345.6	0.157984	Up	0.876427	654	EQB57121	gi|596716715|ref|XP_007285418.1|	60s ribosomal protein l10a [Colletotrichum gloeosporioides Nara gc5] >gi|429850263|gb|ELA25555.1| 60s ribosomal protein l10a [Colletotrichum gloeosporioides Nara gc5]	fpu:FPSE_04802	hypothetical protein; K02865 large subunit ribosomal protein L10Ae	GO:0006412 translation	GO:0003735 structural constituent of ribosome | GO:0003723 RNA binding	GO:0015934 large ribosomal subunit
CGLO_08332	1.47762	3.05289	1.04691	Up	0.41607	1524	EQB52074	gi|530471252|gb|EQB52074.1|	hypothetical protein CGLO_08332 [Colletotrichum gloeosporioides Cg-14]	--	--	GO:0055114 oxidation-reduction process	GO:0016620 oxidoreductase activity, acting on the aldehyde or oxo group of donors, NAD or NADP as acceptor	GO:0016021 integral component of membrane
CGLO_11979	24.7411	14.6529	-0.755725	Down	0.503229	1734	EQB48752	gi|530467060|gb|EQB48752.1|	phytoene desaturase [Colletotrichum gloeosporioides Cg-14]	vda:VDAG_00320	phytoene dehydrogenase; K15745 phytoene desaturase (3,4-didehydrolycopene-forming) [EC:1.3.99.30]	GO:0016117 carotenoid biosynthetic process | GO:0055114 oxidation-reduction process	GO:0016491 oxidoreductase activity	GO:0016021 integral component of membrane
CGLO_04042	13.2257	10.5773	-0.322371	Down	0.902858	546	EQB55984	gi|530476019|gb|EQB55984.1|	hypothetical protein CGLO_04042 [Colletotrichum gloeosporioides Cg-14]	--	--	GO:0006357 regulation of transcription from RNA polymerase II promoter	GO:0008270 zinc ion binding | GO:0000981 RNA polymerase II transcription factor activity, sequence-specific DNA binding | GO:0003677 DNA binding	GO:0005634 nucleus
CGLO_04914	75.8693	43.3972	-0.805914	Down	0.353472	3135	EQB55178	gi|530475045|gb|EQB55178.1|	hsp90-like protein [Colletotrichum gloeosporioides Cg-14]	npa:UCRNP2_3547	putative two-component osmosensing histidine kinase protein; K19691 osomolarity two-component system, sensor histidine kinase NIK1 [EC:2.7.13.3]	GO:0000160 phosphorelay signal transduction system | GO:0023014 signal transduction by protein phosphorylation	GO:0000155 phosphorelay sensor kinase activity	GO:0005622 intracellular
CGLO_09792	2.15703	8.47758	1.97461	Up	0.0275341	1002	EQB50729	gi|530469613|gb|EQB50729.1|	hypothetical protein CGLO_09792 [Colletotrichum gloeosporioides Cg-14]	vda:VDAG_07909	3-hydroxyisobutyrate dehydrogenase; K00020 3-hydroxyisobutyrate dehydrogenase [EC:1.1.1.31]	GO:0055114 oxidation-reduction process	GO:0004616 phosphogluconate dehydrogenase (decarboxylating) activity | GO:0051287 NAD binding	--
CGLO_11987	1.1749	0.931609	-0.334736	Down	0.82444	840	EQB48760	gi|530467068|gb|EQB48760.1|	hypothetical protein CGLO_11987 [Colletotrichum gloeosporioides Cg-14]	nhe:NECHADRAFT_34615	hypothetical protein; K20613 kievitone hydratase [EC:4.2.1.95]	--	--	--
CGLO_00223	99.537	123.983	0.316838	Up	0.744129	1755	EQB59397	gi|530480394|gb|EQB59397.1|	hypothetical protein CGLO_00223 [Colletotrichum gloeosporioides Cg-14]	nhe:NECHADRAFT_67761	hypothetical protein; K06901 putative MFS transporter, AGZA family, xanthine/uracil permease	GO:1904823 purine nucleobase transmembrane transport	GO:0005345 purine nucleobase transmembrane transporter activity	GO:0016021 integral component of membrane
CGLO_06834	84.6367	66.7072	-0.34344	Down	0.729855	2127	EQB53433	gi|530472916|gb|EQB53433.1|	hypothetical protein CGLO_06834 [Colletotrichum gloeosporioides Cg-14]	--	--	GO:0055085 transmembrane transport	--	GO:0016021 integral component of membrane
CGLO_16426	171.502	149.5	-0.198076	Down	0.902858	738	EQB44791	gi|530461754|gb|EQB44791.1|	DSBA-like thioredoxin domain-containing protein [Colletotrichum gloeosporioides Cg-14]	maw:MAC_08670	Dihydrofolate reductase; K00287 dihydrofolate reductase [EC:1.5.1.3]	GO:0055114 oxidation-reduction process	GO:0015035 protein disulfide oxidoreductase activity	--
CGLO_09909	312.301	211.882	-0.559677	Down	0.221019	1530	EQB50631	gi|530469488|gb|EQB50631.1|	hypothetical protein CGLO_09909 [Colletotrichum gloeosporioides Cg-14]	val:VDBG_05892	diacylglycerol O-acyltransferase 2B; K14457 2-acylglycerol O-acyltransferase 2 [EC:2.3.1.22]	GO:0019432 triglyceride biosynthetic process | GO:0019915 lipid storage | GO:0006672 ceramide metabolic process	GO:0004144 diacylglycerol O-acyltransferase activity	GO:0005811 lipid particle | GO:0016021 integral component of membrane
CGLO_01445	2218.05	2095.21	-0.0821998	Down	0.94343	1845	EQB58331	gi|530479073|gb|EQB58331.1|	aspartate kinase [Colletotrichum gloeosporioides Cg-14]	nhe:NECHADRAFT_45463	hypothetical protein; K00928 aspartate kinase [EC:2.7.2.4]	GO:0009088 threonine biosynthetic process | GO:0009089 lysine biosynthetic process via diaminopimelate | GO:0016310 phosphorylation	GO:0004072 aspartate kinase activity | GO:0016597 amino acid binding	--
CGLO_05825	4.82913	8.49959	0.815629	Up	0.623825	1509	EQB54357	gi|530474051|gb|EQB54357.1|	hypothetical protein CGLO_05825 [Colletotrichum gloeosporioides Cg-14]	afm:AFUA_8G01470	flavin containing amine oxidase; K00280 lysyl oxidase-like protein 2/3/4 [EC:1.4.3.-]	GO:0055114 oxidation-reduction process	GO:0016491 oxidoreductase activity	--
CGLO_15663	79.7232	110.517	0.471198	Up	0.569399	2700	EQB45450	gi|530462585|gb|EQB45450.1|	hypothetical protein CGLO_15663 [Colletotrichum gloeosporioides Cg-14]	tmn:UCRPA7_1534	putative f-box protein pof6 protein; K15071 recyclin-1	GO:0048278 vesicle docking | GO:0006887 exocytosis | GO:0034498 early endosome to Golgi transport | GO:0032456 endocytic recycling | GO:0006897 endocytosis	GO:0000149 SNARE binding	GO:0005768 endosome | GO:0005794 Golgi apparatus | GO:0030427 site of polarized growth
CGLO_05134	124.111	143.187	0.206265	Up	0.91157	489	EQB54984	gi|530474810|gb|EQB54984.1|	hypothetical protein CGLO_05134 [Colletotrichum gloeosporioides Cg-14]	--	--	GO:0055114 oxidation-reduction process	GO:0016491 oxidoreductase activity	--
CGLO_01460	0.388812	0.341454	-0.18738	Down	0.902858	1656	EQB58311	gi|530479051|gb|EQB58311.1|	hypothetical protein CGLO_01460 [Colletotrichum gloeosporioides Cg-14]	afv:AFLA_005130	L-lysine 2,3-aminomutase, putative; K01843 lysine 2,3-aminomutase [EC:5.4.3.2]	--	--	--
CGLO_11216	416.378	318.23	-0.387823	Down	0.547895	1386	EQB49457	gi|530467983|gb|EQB49457.1|	ZIP Zinc transporter [Colletotrichum gloeosporioides Cg-14]	tml:GSTUM_00008736001	hypothetical protein; K14709 solute carrier family 39 (zinc transporter), member 1/2/3	GO:0030001 metal ion transport | GO:0055085 transmembrane transport	GO:0046873 metal ion transmembrane transporter activity	GO:0016021 integral component of membrane
CGLO_01547	0.946141	1.23539	0.384841	Up	0.853363	927	EQB58232	gi|530478958|gb|EQB58232.1|	glycosyl hydrolase family 61 [Colletotrichum gloeosporioides Cg-14]	afm:AFUA_3G03870	endo-1,4-beta-glucanase; K01179 endoglucanase [EC:3.2.1.4]	GO:0008152 metabolic process	GO:0016787 hydrolase activity	--
CGLO_16816	3.25926	2.73818	-0.251328	Down	0.938616	480	EQB44439	gi|530461294|gb|EQB44439.1|	hypothetical protein CGLO_16816 [Colletotrichum gloeosporioides Cg-14]	--	--	GO:0055114 oxidation-reduction process	GO:0016491 oxidoreductase activity | GO:0008270 zinc ion binding	GO:0016020 membrane
CGLO_17765	51.1754	53.5686	0.0659375	Up	0.966181	588	EQB43576	gi|530460193|gb|EQB43576.1|	hypothetical protein CGLO_17765 [Colletotrichum gloeosporioides Cg-14]	maj:MAA_07111	DNA-directed RNA polymerase, M/15kDa subunit; K03017 DNA-directed RNA polymerase II subunit RPB9	GO:0006283 transcription-coupled nucleotide-excision repair | GO:0006367 transcription initiation from RNA polymerase II promoter | GO:0001172 transcription, RNA-templated | GO:0001193 maintenance of transcriptional fidelity during DNA-templated transcription elongation from RNA polymerase II promoter	GO:0003899 DNA-directed RNA polymerase activity | GO:0008270 zinc ion binding | GO:0003677 DNA binding	GO:0005665 DNA-directed RNA polymerase II, core complex
CGLO_03901	7.03215	7.28114	0.0501981	Up	0.979526	2067	EQB56108	gi|530476165|gb|EQB56108.1|	hypothetical protein CGLO_03901 [Colletotrichum gloeosporioides Cg-14]	fpu:FPSE_08102	hypothetical protein; K01930 folylpolyglutamate synthase [EC:6.3.2.17]	--	--	--
CGLO_08592	27.2499	75.6505	1.4731	Up	0.0316612	1542	EQB51832	gi|530470951|gb|EQB51832.1|	hypothetical protein CGLO_08592 [Colletotrichum gloeosporioides Cg-14]	tre:TRIREDRAFT_65191	hypothetical protein; K08141 MFS transporter, SP family, general alpha glucoside:H+ symporter	GO:0055085 transmembrane transport	GO:0022891 substrate-specific transmembrane transporter activity	GO:0016021 integral component of membrane
CGLO_05206	262.161	250.302	-0.066783	Down	0.956398	3183	EQB54911	gi|530474724|gb|EQB54911.1|	DSHCT domain-containing protein [Colletotrichum gloeosporioides Cg-14]	vda:VDAG_01641	antiviral helicase SKI2; K12599 antiviral helicase SKI2 [EC:3.6.4.-]	GO:0070481 nuclear-transcribed mRNA catabolic process, non-stop decay | GO:0070478 nuclear-transcribed mRNA catabolic process, 3'-5' exonucleolytic nonsense-mediated decay	GO:0003723 RNA binding | GO:0005524 ATP binding | GO:0003724 RNA helicase activity	GO:0055087 Ski complex
CGLO_10922	2424.61	1830.06	-0.405862	Down	0.174936	1068	EQB49710	gi|596699354|ref|XP_007282261.1|	sphingolipid long chain base-responsive protein lsp1 [Colletotrichum gloeosporioides Nara gc5] >gi|429853643|gb|ELA28703.1| sphingolipid long chain base-responsive protein lsp1 [Colletotrichum gloeosporioides Nara gc5] >gi|530468306|gb|EQB49710.1| sphingolipid long chain base-responsive protein LSP1 [Colletotrichum gloeosporioides Cg-14]	ela:UCREL1_5432	putative ubiquinone biosynthesis monooxygenase coq6 protein; K06126 ubiquinone biosynthesis monooxygenase Coq6 [EC:1.14.13.-]	--	--	--
CGLO_10673	1064.93	912.5	-0.222863	Down	0.876427	711	EQB49941	gi|530468607|gb|EQB49941.1|	DnaJ domain-containing protein [Colletotrichum gloeosporioides Cg-14]	bfu:BC1G_08256	hypothetical protein; K17867 diphthamide biosynthesis protein 4	--	--	GO:0005783 endoplasmic reticulum
CGLO_07680	67.1977	69.2873	0.0441796	Up	0.971132	780	EQB52669	gi|530471979|gb|EQB52669.1|	hypothetical protein CGLO_07680 [Colletotrichum gloeosporioides Cg-14]	pco:PHACADRAFT_251350	hypothetical protein; K00065 2-deoxy-D-gluconate 3-dehydrogenase [EC:1.1.1.125]	GO:0055114 oxidation-reduction process	GO:0016491 oxidoreductase activity	--
CGLO_13601	35.2217	62.4557	0.826367	Up	0.436495	1401	EQB47274	gi|530465100|gb|EQB47274.1|	glucose/galactose transporter [Colletotrichum gloeosporioides Cg-14]	val:VDBG_05715	glucose/galactose transporter; K02429 MFS transporter, FHS family, L-fucose permease	GO:0055085 transmembrane transport	--	GO:0016021 integral component of membrane
CGLO_00328	10.7305	9.39417	-0.191876	Down	0.94343	1041	EQB59312	gi|530480277|gb|EQB59312.1|	hypothetical protein CGLO_00328 [Colletotrichum gloeosporioides Cg-14]	ure:UREG_00738	hypothetical protein; K12584 m7GpppX diphosphatase [EC:3.6.1.59]	GO:0032259 methylation	GO:0008168 methyltransferase activity	--
CGLO_06992	649.505	619.337	-0.0686144	Down	0.946667	4938	EQB53290	gi|530472742|gb|EQB53290.1|	hypothetical protein CGLO_06992 [Colletotrichum gloeosporioides Cg-14]	vda:VDAG_08303	myosin-2; K10357 myosin V	GO:0008152 metabolic process	GO:0005524 ATP binding | GO:0051015 actin filament binding | GO:0003774 motor activity	GO:0016459 myosin complex
CGLO_06675	127.957	206.797	0.692562	Up	0.184297	1848	EQB53591	gi|530473103|gb|EQB53591.1|	major facilitator superfamily transporter [Colletotrichum gloeosporioides Cg-14]	ang:ANI_1_1124164	An18g01720; caffeine resistance protein 5; K08158 MFS transporter, DHA1 family, multidrug resistance protein	GO:0055085 transmembrane transport	--	GO:0016021 integral component of membrane
CGLO_15297	925.711	1137.86	0.297685	Up	0.611626	693	EQB45784	gi|530462994|gb|EQB45784.1|	hypothetical protein CGLO_15297 [Colletotrichum gloeosporioides Cg-14]	maj:MAA_01680	hypothetical protein; K02137 F-type H+-transporting ATPase subunit O	GO:0015986 ATP synthesis coupled proton transport	GO:0046961 proton-transporting ATPase activity, rotational mechanism | GO:0046933 proton-transporting ATP synthase activity, rotational mechanism	GO:0000274 mitochondrial proton-transporting ATP synthase, stator stalk
CGLO_15548	1.16666	1.17358	0.00854154	Up	0.995037	252	EQB45564	gi|530462722|gb|EQB45564.1|	hypothetical protein CGLO_15548 [Colletotrichum gloeosporioides Cg-14]	--	--	--	--	--
CGLO_02490	0.61226	0.687405	0.167017	Up	0.939537	651	EQB57385	gi|530477933|gb|EQB57385.1|	hypothetical protein CGLO_02490 [Colletotrichum gloeosporioides Cg-14]	--	--	--	--	--
CGLO_02127	24.9097	14.812	-0.749944	Down	0.613354	1533	EQB57702	gi|530478327|gb|EQB57702.1|	integral membrane protein [Colletotrichum gloeosporioides Cg-14]	aor:AOR_1_60154	AO090003000032; hypothetical protein; K00108 choline dehydrogenase [EC:1.1.99.1]	--	--	GO:0016021 integral component of membrane
CGLO_05958	133.51	138.587	0.0538423	Up	0.966181	1545	EQB54233	gi|530473899|gb|EQB54233.1|	ubiquitin carboxyl-terminal hydrolase [Colletotrichum gloeosporioides Cg-14]	val:VDBG_07440	ubiquitin carboxyl-terminal hydrolase; K11366 ubiquitin carboxyl-terminal hydrolase 22/27/51 [EC:3.4.19.12]	GO:0006511 ubiquitin-dependent protein catabolic process | GO:0016578 histone deubiquitination | GO:0034729 histone H3-K79 methylation | GO:0008380 RNA splicing | GO:0051568 histone H3-K4 methylation	GO:0008270 zinc ion binding | GO:0032947 protein complex scaffold | GO:0004843 thiol-dependent ubiquitin-specific protease activity	GO:0000124 SAGA complex | GO:0046695 SLIK (SAGA-like) complex | GO:0071819 DUBm complex
CGLO_08197	12.8508	23.0843	0.84505	Up	0.507286	1233	EQB52196	gi|530471410|gb|EQB52196.1|	hypothetical protein CGLO_08197 [Colletotrichum gloeosporioides Cg-14]	--	--	--	--	--
CGLO_10353	316.231	283.583	-0.157205	Down	0.888586	1539	EQB50234	gi|530468986|gb|EQB50234.1|	hypothetical protein CGLO_10353 [Colletotrichum gloeosporioides Cg-14]	--	--	--	--	--
CGLO_04795	248.521	199.561	-0.316539	Down	0.670223	984	EQB55294	gi|530475182|gb|EQB55294.1|	hypothetical protein CGLO_04795 [Colletotrichum gloeosporioides Cg-14]	--	--	GO:0055114 oxidation-reduction process | GO:0006629 lipid metabolic process	GO:0016627 oxidoreductase activity, acting on the CH-CH group of donors	GO:0016021 integral component of membrane | GO:0005737 cytoplasm
CGLO_09253	163.346	163.873	0.00464713	Up	0.996331	924	EQB51229	gi|530470215|gb|EQB51229.1|	hypothetical protein CGLO_09253 [Colletotrichum gloeosporioides Cg-14]	fme:FOMMEDRAFT_23018	NAP-domain-containing protein; K11279 nucleosome assembly protein 1-like 1	GO:0006334 nucleosome assembly	--	GO:0005634 nucleus
CGLO_06226	716.32	715.211	-0.00223481	Down	0.997019	396	EQB53988	gi|596668547|ref|XP_007276498.1|	60s ribosomal protein l32 [Colletotrichum gloeosporioides Nara gc5] >gi|429859682|gb|ELA34453.1| 60s ribosomal protein l32 [Colletotrichum gloeosporioides Nara gc5]	val:VDBG_06646	60S ribosomal protein L32; K02912 large subunit ribosomal protein L32e	GO:0002181 cytoplasmic translation	GO:0003735 structural constituent of ribosome	GO:0022625 cytosolic large ribosomal subunit
CGLO_16621	131.052	142.727	0.123117	Up	0.938616	1035	EQB44615	gi|530461523|gb|EQB44615.1|	Mob1/phocein family protein [Colletotrichum gloeosporioides Cg-14]	cci:CC1G_00259	mps one binder kinase activator-like 1; K06685 MOB kinase activator 1	GO:0000920 cell separation after cytokinesis | GO:0032147 activation of protein kinase activity | GO:0007163 establishment or maintenance of cell polarity | GO:0007118 budding cell apical bud growth	GO:0030295 protein kinase activator activity | GO:0016301 kinase activity	GO:0005935 cellular bud neck | GO:0043332 mating projection tip | GO:0005934 cellular bud tip | GO:0005634 nucleus
CGLO_11665	441.094	481.173	0.125469	Up	0.930642	348	EQB49034	gi|596714698|ref|XP_007285083.1|	40s ribosomal protein s20 [Colletotrichum gloeosporioides Nara gc5] >gi|429850571|gb|ELA25830.1| 40s ribosomal protein s20 [Colletotrichum gloeosporioides Nara gc5]	mgr:MGG_03372	40S ribosomal protein S20; K02969 small subunit ribosomal protein S20e	GO:0000462 maturation of SSU-rRNA from tricistronic rRNA transcript (SSU-rRNA, 5.8S rRNA, LSU-rRNA) | GO:0002181 cytoplasmic translation	GO:0003723 RNA binding | GO:0003735 structural constituent of ribosome	GO:0022627 cytosolic small ribosomal subunit
CGLO_12793	20.5151	19.3187	-0.0866886	Down	0.966181	906	EQB48016	gi|530466114|gb|EQB48016.1|	hypothetical protein CGLO_12793 [Colletotrichum gloeosporioides Cg-14]	tmn:UCRPA7_6524	putative cytidine deaminase protein; K01489 cytidine deaminase [EC:3.5.4.5]	GO:0055114 oxidation-reduction process	GO:0016491 oxidoreductase activity	--
CGLO_00962	469.383	483.272	0.0420682	Up	0.968093	1665	EQB58749	gi|530479588|gb|EQB58749.1|	hypothetical protein CGLO_00962 [Colletotrichum gloeosporioides Cg-14]	--	--	--	GO:0046872 metal ion binding | GO:0003677 DNA binding	--
CGLO_10048	1.90527	3.53063	0.889932	Up	0.54032	1803	EQB50506	gi|530469331|gb|EQB50506.1|	hypothetical protein CGLO_10048 [Colletotrichum gloeosporioides Cg-14]	--	--	GO:0005975 carbohydrate metabolic process	GO:0004553 hydrolase activity, hydrolyzing O-glycosyl compounds	--
CGLO_10554	97.6103	97.2317	-0.00560807	Down	0.993994	2634	EQB50042	gi|530468738|gb|EQB50042.1|	hypothetical protein CGLO_10554 [Colletotrichum gloeosporioides Cg-14]	yli:YALI0E34001g	YALI0E34001p; K08286 protein-serine/threonine kinase [EC:2.7.11.-]	GO:0006468 protein phosphorylation	GO:0004672 protein kinase activity | GO:0005524 ATP binding	--
CGLO_04563	341.944	483.442	0.499584	Up	0.287086	912	EQB55501	gi|530475434|gb|EQB55501.1|	hypothetical protein CGLO_04563 [Colletotrichum gloeosporioides Cg-14]	pbl:PAAG_12482	PAAG_07992, PAAG_07993; hypothetical protein; K11274 chromosome transmission fidelity protein 4	GO:0042797 tRNA transcription from RNA polymerase III promoter	GO:0003899 DNA-directed RNA polymerase activity | GO:0003677 DNA binding | GO:0032549 ribonucleoside binding	GO:0005666 DNA-directed RNA polymerase III complex
CGLO_01501	2.38987	2.51648	0.0744749	Up	0.969252	1446	EQB58287	gi|530479024|gb|EQB58287.1|	hypothetical protein CGLO_01501 [Colletotrichum gloeosporioides Cg-14]	ani:AN3929.2	hypothetical protein; K11369 retrograde regulation protein 2	GO:0055085 transmembrane transport	--	GO:0016021 integral component of membrane
CGLO_07711	102.457	145.356	0.504573	Up	0.729993	1374	EQB52646	gi|530471952|gb|EQB52646.1|	sodium/hydrogen exchanger family protein [Colletotrichum gloeosporioides Cg-14]	mgr:MGG_05211	Na(+)/H(+) antiporter 2; K03316 monovalent cation:H+ antiporter, CPA1 family	GO:1902600 hydrogen ion transmembrane transport	GO:0015299 solute:proton antiporter activity	GO:0016021 integral component of membrane
CGLO_01545	0.774859	0.801506	0.04878	Up	0.97596	1209	EQB58230	gi|530478956|gb|EQB58230.1|	hypothetical protein CGLO_01545 [Colletotrichum gloeosporioides Cg-14]	--	--	--	--	GO:0016021 integral component of membrane
CGLO_08470	22.9059	18.7012	-0.292587	Down	0.902858	4770	EQB51944	gi|530471094|gb|EQB51944.1|	hypothetical protein CGLO_08470 [Colletotrichum gloeosporioides Cg-14]	vda:VDAG_02920	hypothetical protein; K19791 iron transport multicopper oxidase	GO:0006508 proteolysis	GO:0008237 metallopeptidase activity	--
CGLO_05288	0.373852	0.328316	-0.18738	Down	0.902858	675	EQB54828	gi|530474634|gb|EQB54828.1|	LysM domain-containing protein [Colletotrichum gloeosporioides Cg-14]	--	--	--	--	--
CGLO_08435	103.729	111.283	0.101404	Up	0.956963	1404	EQB51983	gi|530471139|gb|EQB51983.1|	hypothetical protein CGLO_08435 [Colletotrichum gloeosporioides Cg-14]	tre:TRIREDRAFT_68425	hypothetical protein; K03457 nucleobase:cation symporter-1, NCS1 family	GO:0051123 RNA polymerase II transcriptional preinitiation complex assembly | GO:1901714 positive regulation of urea catabolic process | GO:0001080 nitrogen catabolite activation of transcription from RNA polymerase II promoter | GO:1901717 positive regulation of gamma-aminobutyric acid catabolic process | GO:0045944 positive regulation of transcription from RNA polymerase II promoter	GO:0008270 zinc ion binding | GO:0001135 transcription factor activity, RNA polymerase II transcription factor recruiting | GO:0001128 RNA polymerase II transcription coactivator activity involved in preinitiation complex assembly | GO:0003677 DNA binding | GO:0000981 RNA polymerase II transcription factor activity, sequence-specific DNA binding	GO:0005634 nucleus
CGLO_13557	365.321	388.36	0.0882322	Up	0.957765	1173	EQB47316	gi|530465159|gb|EQB47316.1|	hypothetical protein CGLO_13557 [Colletotrichum gloeosporioides Cg-14]	nhe:NECHADRAFT_80520	hypothetical protein; K01754 threonine dehydratase [EC:4.3.1.19]	--	--	--
CGLO_09978	0.207055	0.192217	-0.107279	Down	0.94343	276	EQB50586	gi|530469430|gb|EQB50586.1|	hypothetical protein CGLO_09978 [Colletotrichum gloeosporioides Cg-14]	--	--	--	--	--
CGLO_06800	21.7086	24.4139	0.169439	Up	0.938616	1551	EQB53468	gi|530472960|gb|EQB53468.1|	major facilitator superfamily transporter [Colletotrichum gloeosporioides Cg-14]	--	--	GO:0055085 transmembrane transport	GO:0005215 transporter activity	GO:0016021 integral component of membrane
CGLO_00497	23.1384	18.2293	-0.34403	Down	0.879802	1443	EQB59149	gi|530480078|gb|EQB59149.1|	hypothetical protein CGLO_00497 [Colletotrichum gloeosporioides Cg-14]	--	--	--	--	--
CGLO_06740	691.715	519.857	-0.412062	Down	0.416453	1800	EQB53492	gi|530472992|gb|EQB53492.1|	flavoprotein [Colletotrichum gloeosporioides Cg-14]	npa:UCRNP2_5735	putative phosphopantothenoylcysteine decarboxylase protein; K01598 phosphopantothenoylcysteine decarboxylase [EC:4.1.1.36]	GO:0008152 metabolic process	GO:0003824 catalytic activity	--
CGLO_00096	6.56416	3.293	-0.995205	Down	0.474521	1503	EQB59491	gi|530480517|gb|EQB59491.1|	hypothetical protein CGLO_00096 [Colletotrichum gloeosporioides Cg-14]	nhe:NECHADRAFT_95884	hypothetical protein; K07824 benzoate 4-monooxygenase [EC:1.14.13.12]	GO:0005975 carbohydrate metabolic process | GO:0055114 oxidation-reduction process	GO:0004553 hydrolase activity, hydrolyzing O-glycosyl compounds | GO:0020037 heme binding | GO:0016705 oxidoreductase activity, acting on paired donors, with incorporation or reduction of molecular oxygen | GO:0004497 monooxygenase activity | GO:0005506 iron ion binding	GO:0016021 integral component of membrane
CGLO_06688	413.813	102.742	-2.00996	Down	0.000670859	729	EQB53570	gi|530473081|gb|EQB53570.1|	isoprenylcysteine carboxyl methyltransferase [Colletotrichum gloeosporioides Cg-14]	--	--	GO:0006481 C-terminal protein methylation	GO:0004671 protein C-terminal S-isoprenylcysteine carboxyl O-methyltransferase activity	GO:0005789 endoplasmic reticulum membrane | GO:0016021 integral component of membrane
CGLO_08564	1558.01	721.394	-1.11085	Down	0.0001529	801	EQB51853	gi|530470977|gb|EQB51853.1|	hypothetical protein CGLO_08564 [Colletotrichum gloeosporioides Cg-14]	val:VDBG_02657	L-xylulose reductase; K17742 sorbose reductase [EC:1.1.1.289]	GO:0055114 oxidation-reduction process	GO:0016491 oxidoreductase activity	--
CGLO_12659	3052.11	3004.33	-0.0227637	Down	0.979526	1908	EQB48137	gi|530466279|gb|EQB48137.1|	hypothetical protein CGLO_12659 [Colletotrichum gloeosporioides Cg-14]	pno:SNOG_12170	hypothetical protein; K00767 nicotinate-nucleotide pyrophosphorylase (carboxylating) [EC:2.4.2.19]	GO:0006357 regulation of transcription from RNA polymerase II promoter	GO:0008270 zinc ion binding | GO:0000981 RNA polymerase II transcription factor activity, sequence-specific DNA binding | GO:0003677 DNA binding	GO:0005634 nucleus
CGLO_12666	21.1378	26.0993	0.304181	Up	0.882949	321	EQB48125	gi|1000224378|gb|KXJ93381.1|	DEAD/DEAH box helicase [Microdochium bolleyi]	smp:SMAC_03934	hypothetical protein; K13025 ATP-dependent RNA helicase [EC:3.6.4.13]	GO:0006413 translational initiation | GO:0010501 RNA secondary structure unwinding | GO:0000462 maturation of SSU-rRNA from tricistronic rRNA transcript (SSU-rRNA, 5.8S rRNA, LSU-rRNA) | GO:0010468 regulation of gene expression | GO:0008380 RNA splicing	GO:0003743 translation initiation factor activity | GO:0004004 ATP-dependent RNA helicase activity | GO:0005524 ATP binding	GO:0005829 cytosol | GO:0005730 nucleolus | GO:0097078 FAL1-SGD1 complex | GO:0071013 catalytic step 2 spliceosome
CGLO_02005	2114.47	1319.96	-0.679808	Down	0.24022	1185	EQB57822	gi|530478463|gb|EQB57822.1|	hypothetical protein CGLO_02005 [Colletotrichum gloeosporioides Cg-14]	--	--	--	--	--
CGLO_01986	0.149666	0.155258	0.0529239	Up	0.966181	537	EQB57835	gi|530478478|gb|EQB57835.1|	hypothetical protein CGLO_01986 [Colletotrichum gloeosporioides Cg-14]	--	--	--	GO:0046872 metal ion binding	--
CGLO_09543	1.68328	1.48426	-0.181535	Down	0.94343	759	EQB50940	gi|530469868|gb|EQB50940.1|	hypothetical protein CGLO_09543 [Colletotrichum gloeosporioides Cg-14]	maj:MAA_06739	oxidoreductase; K17746 chanoclavine-I dehydrogenase [EC:1.1.1.332]	GO:0055114 oxidation-reduction process	GO:0016491 oxidoreductase activity	--
CGLO_04866	61.8076	104.592	0.758914	Up	0.183149	2121	EQB55213	gi|530475085|gb|EQB55213.1|	hypothetical protein CGLO_04866 [Colletotrichum gloeosporioides Cg-14]	--	--	GO:0006364 rRNA processing	GO:0003723 RNA binding	GO:0005634 nucleus
CGLO_03974	12.0465	13.5236	0.16686	Up	0.945104	375	EQB56039	gi|530476091|gb|EQB56039.1|	hypothetical protein CGLO_03974 [Colletotrichum gloeosporioides Cg-14]	--	--	--	--	--
CGLO_12391	1.56621	1.28713	-0.28312	Down	0.912617	2643	EQB48369	gi|530466586|gb|EQB48369.1|	hypothetical protein CGLO_12391 [Colletotrichum gloeosporioides Cg-14]	afv:AFLA_120400	hypothetical protein; K05989 alpha-L-rhamnosidase [EC:3.2.1.40]	GO:0008152 metabolic process	GO:0003824 catalytic activity	--
CGLO_04232	11.1563	19.5955	0.812668	Up	0.495068	765	EQB55808	gi|530475797|gb|EQB55808.1|	hypothetical protein CGLO_04232 [Colletotrichum gloeosporioides Cg-14]	--	--	GO:0005975 carbohydrate metabolic process	GO:0052692 raffinose alpha-galactosidase activity	GO:0016021 integral component of membrane
CGLO_13805	3.28861	3.47811	0.080825	Up	0.971132	1260	EQB47096	gi|530464841|gb|EQB47096.1|	glycosyl hydrolase family 7 [Colletotrichum gloeosporioides Cg-14]	nhe:NECHADRAFT_42608	hypothetical protein; K19357 cellulase [EC:3.2.1.4]	GO:0030245 cellulose catabolic process	GO:0004553 hydrolase activity, hydrolyzing O-glycosyl compounds	--
CGLO_04530	5.10918	9.93988	0.960136	Up	0.491423	3951	EQB55534	gi|530475473|gb|EQB55534.1|	hypothetical protein CGLO_04530 [Colletotrichum gloeosporioides Cg-14]	--	--	--	--	--
CGLO_00608	0.182066	0.169018	-0.107279	Down	0.94343	459	EQB59048	gi|530479955|gb|EQB59048.1|	hypothetical protein CGLO_00608 [Colletotrichum gloeosporioides Cg-14]	--	--	GO:0055114 oxidation-reduction process	GO:0050660 flavin adenine dinucleotide binding | GO:0016614 oxidoreductase activity, acting on CH-OH group of donors	--
CGLO_06810	176.5	109.792	-0.684893	Down	0.493164	519	EQB53456	gi|530472945|gb|EQB53456.1|	hypothetical protein CGLO_06810 [Colletotrichum gloeosporioides Cg-14]	--	--	--	--	GO:0016021 integral component of membrane
CGLO_12396	30695.5	27210.3	-0.173876	Down	0.831071	897	EQB48374	gi|530466591|gb|EQB48374.1|	hypothetical protein CGLO_12396 [Colletotrichum gloeosporioides Cg-14]	vda:VDAG_06037	GPR1/FUN34/yaaH family protein; K07034 uncharacterized protein	--	--	GO:0016021 integral component of membrane | GO:0005783 endoplasmic reticulum | GO:0005794 Golgi apparatus | GO:0000329 fungal-type vacuole membrane
CGLO_02162	3491.03	2682.96	-0.379827	Down	0.591049	2202	EQB57676	gi|530478294|gb|EQB57676.1|	transient receptor potential ion channel [Colletotrichum gloeosporioides Cg-14]	--	--	--	--	GO:0016021 integral component of membrane
CGLO_10961	15.3595	6.85202	-1.16453	Down	0.276687	300	EQB49681	gi|530468267|gb|EQB49681.1|	alcohol dehydrogenase GroES-like domain-containing protein [Colletotrichum gloeosporioides Cg-14]	fgr:FGSG_07318	hypothetical protein; K13953 alcohol dehydrogenase, propanol-preferring [EC:1.1.1.1]	GO:0055114 oxidation-reduction process	GO:0008270 zinc ion binding | GO:0016491 oxidoreductase activity	--
CGLO_00825	356.108	513.222	0.52727	Up	0.333313	795	EQB58869	gi|596712313|ref|XP_007284649.1|	proteasome component [Colletotrichum gloeosporioides Nara gc5] >gi|429851091|gb|ELA26308.1| proteasome component [Colletotrichum gloeosporioides Nara gc5]	tmn:UCRPA7_7824	putative proteasome subunit alpha type-1 protein; K02725 20S proteasome subunit alpha 6 [EC:3.4.25.1]	GO:0010499 proteasomal ubiquitin-independent protein catabolic process | GO:0045842 positive regulation of mitotic metaphase/anaphase transition	GO:0004298 threonine-type endopeptidase activity	GO:0042175 nuclear outer membrane-endoplasmic reticulum membrane network | GO:0034515 proteasome storage granule | GO:0019773 proteasome core complex, alpha-subunit complex | GO:0005634 nucleus
CGLO_02560	12.2171	25.6286	1.06885	Up	0.184297	1080	EQB57335	gi|530477875|gb|EQB57335.1|	hypothetical protein CGLO_02560 [Colletotrichum gloeosporioides Cg-14]	ure:UREG_00738	hypothetical protein; K12584 m7GpppX diphosphatase [EC:3.6.1.59]	GO:0032259 methylation	GO:0008168 methyltransferase activity	--
CGLO_08922	893.026	774.514	-0.205411	Down	0.856133	654	EQB51525	gi|530470575|gb|EQB51525.1|	hypothetical protein CGLO_08922 [Colletotrichum gloeosporioides Cg-14]	vda:VDAG_02730	NADH-ubiquinone oxidoreductase 20.8 kDa subunit; K03952 NADH dehydrogenase (ubiquinone) 1 alpha subcomplex subunit 8	--	--	--
CGLO_17092	0.142609	0.147938	0.0529239	Up	0.966181	1482	EQB44178	gi|530460956|gb|EQB44178.1|	hypothetical protein CGLO_17092 [Colletotrichum gloeosporioides Cg-14]	pbn:PADG_02104	hypothetical protein; K00485 dimethylaniline monooxygenase (N-oxide forming) [EC:1.14.13.8]	GO:0055114 oxidation-reduction process	GO:0050660 flavin adenine dinucleotide binding | GO:0004499 N,N-dimethylaniline monooxygenase activity | GO:0050661 NADP binding	--
CGLO_12216	9883.15	7725.71	-0.355304	Down	0.827913	666	EQB48530	gi|530466795|gb|EQB48530.1|	hypothetical protein CGLO_12216 [Colletotrichum gloeosporioides Cg-14]	--	--	GO:0006355 regulation of transcription, DNA-templated	GO:0043565 sequence-specific DNA binding | GO:0003700 transcription factor activity, sequence-specific DNA binding	--
CGLO_04941	2.23621	2.92672	0.388234	Up	0.886769	201	EQB55164	gi|530475024|gb|EQB55164.1|	hypothetical protein CGLO_04941 [Colletotrichum gloeosporioides Cg-14]	--	--	--	--	--
CGLO_14053	44.2409	45.8919	0.0528595	Up	0.966181	474	EQB46865	gi|530464494|gb|EQB46865.1|	hypothetical protein CGLO_14053 [Colletotrichum gloeosporioides Cg-14]	val:VDBG_06672	calponin; K20526 transgelin	GO:0051764 actin crosslink formation | GO:0000281 mitotic cytokinesis | GO:0001300 chronological cell aging	GO:0030674 protein binding, bridging | GO:0051015 actin filament binding	GO:0051286 cell tip | GO:0032153 cell division site | GO:0005634 nucleus | GO:0005829 cytosol | GO:0030479 actin cortical patch
CGLO_08477	734.323	735.009	0.00134753	Up	0.997494	795	EQB51932	gi|530471078|gb|EQB51932.1|	proteasome A-type and B-type [Colletotrichum gloeosporioides Cg-14]	val:VDBG_00502	proteasome subunit alpha type-6-B; K02730 20S proteasome subunit alpha 1 [EC:3.4.25.1]	GO:0010499 proteasomal ubiquitin-independent protein catabolic process | GO:0045842 positive regulation of mitotic metaphase/anaphase transition	GO:0004298 threonine-type endopeptidase activity	GO:0042175 nuclear outer membrane-endoplasmic reticulum membrane network | GO:0034515 proteasome storage granule | GO:0019773 proteasome core complex, alpha-subunit complex | GO:0005634 nucleus
CGLO_06562	1339.32	902.279	-0.56985	Down	0.521142	2013	EQB53699	gi|530473228|gb|EQB53699.1|	hypothetical protein CGLO_06562 [Colletotrichum gloeosporioides Cg-14]	--	--	GO:0030490 maturation of SSU-rRNA | GO:0051096 positive regulation of helicase activity | GO:0000398 mRNA splicing, via spliceosome | GO:0032781 positive regulation of ATPase activity	GO:0003676 nucleic acid binding	GO:0030686 90S preribosome | GO:0030688 preribosome, small subunit precursor | GO:0030687 preribosome, large subunit precursor
CGLO_17143	4.64442	10.1784	1.13195	Up	0.34387	1581	EQB44144	gi|530460916|gb|EQB44144.1|	lactose permease [Colletotrichum gloeosporioides Cg-14]	ela:UCREL1_8805	putative general substrate transporter protein; K01487 guanine deaminase [EC:3.5.4.3]	GO:0055085 transmembrane transport	GO:0022891 substrate-specific transmembrane transporter activity	GO:0016021 integral component of membrane
CGLO_12825	146.518	112.734	-0.378152	Down	0.713965	1800	EQB47981	gi|530466065|gb|EQB47981.1|	H3 K56 histone acetylation protein KAT11 [Colletotrichum gloeosporioides Cg-14]	vda:VDAG_04982	hypothetical protein; K11309 regulator of Ty1 transposition protein 109	GO:0030702 chromatin silencing at centromere | GO:0097043 histone H3-K56 acetylation | GO:0043007 maintenance of rDNA | GO:0006303 double-strand break repair via nonhomologous end joining | GO:0043618 regulation of transcription from RNA polymerase II promoter in response to stress | GO:0010526 negative regulation of transposition, RNA-mediated	GO:0032931 histone acetyltransferase activity (H3-K56 specific)	GO:0000775 chromosome, centromeric region | GO:0005634 nucleus
CGLO_01760	256.971	220.099	-0.223456	Down	0.847889	528	EQB58046	gi|530478729|gb|EQB58046.1|	hypothetical protein CGLO_01760 [Colletotrichum gloeosporioides Cg-14]	--	--	--	--	GO:0016021 integral component of membrane
CGLO_14773	66.1542	65.3975	-0.0165979	Down	0.98633	630	EQB46189	gi|530463542|gb|EQB46189.1|	spindle pole body component alp14 [Colletotrichum gloeosporioides Cg-14]	val:VDBG_08950	spindle pole body component alp14; K16803 cytoskeleton-associated protein 5	GO:0030472 mitotic spindle organization in nucleus | GO:0007020 microtubule nucleation	GO:0008017 microtubule binding | GO:0005200 structural constituent of cytoskeleton	GO:0005876 spindle microtubule | GO:0005816 spindle pole body | GO:0005938 cell cortex | GO:0000778 condensed nuclear chromosome kinetochore
CGLO_07547	357.532	144.66	-1.30541	Down	0.206642	1056	EQB52801	gi|530472144|gb|EQB52801.1|	hypothetical protein CGLO_07547 [Colletotrichum gloeosporioides Cg-14]	afv:AFLA_066920	alcohol dehydrogenase, putative; K15385 aspyridone synthetase trans-acting enoyl reductase	GO:0055114 oxidation-reduction process	GO:0008270 zinc ion binding | GO:0016491 oxidoreductase activity	--
CGLO_03699	51.143	56.4577	0.142632	Up	0.94343	900	EQB56306	gi|530476402|gb|EQB56306.1|	acetyltransferase [Colletotrichum gloeosporioides Cg-14]	--	--	GO:0008152 metabolic process	GO:0016747 transferase activity, transferring acyl groups other than amino-acyl groups	--
CGLO_11103	103.082	175.573	0.768282	Up	0.527982	387	EQB49553	gi|530468110|gb|EQB49553.1|	hypothetical protein CGLO_11103 [Colletotrichum gloeosporioides Cg-14]	--	--	--	--	--
CGLO_03171	0.425164	0.373378	-0.18738	Down	0.902858	1119	EQB56787	gi|530477180|gb|EQB56787.1|	TfdA family Taurine catabolism dioxygenase TauD [Colletotrichum gloeosporioides Cg-14]	--	--	GO:0055114 oxidation-reduction process	GO:0051213 dioxygenase activity	--
CGLO_00673	1.89757	2.25639	0.249866	Up	0.938616	1440	EQB59004	gi|530479898|gb|EQB59004.1|	hypothetical protein CGLO_00673 [Colletotrichum gloeosporioides Cg-14]	--	--	--	--	--
CGLO_05236	4.55442	8.0739	0.825998	Up	0.578706	1437	EQB54870	gi|530474679|gb|EQB54870.1|	amino acid permease [Colletotrichum gloeosporioides Cg-14]	fpu:FPSE_04468	hypothetical protein; K19564 choline transport protein	GO:0003333 amino acid transmembrane transport	GO:0015171 amino acid transmembrane transporter activity	GO:0016021 integral component of membrane
CGLO_02610	51.5702	55.1387	0.0965268	Up	0.956837	981	EQB57285	gi|530477804|gb|EQB57285.1|	hypothetical protein CGLO_02610 [Colletotrichum gloeosporioides Cg-14]	tmn:UCRPA7_7325	putative cell division control protein 2 protein; K04563 cyclin-dependent kinase [EC:2.7.11.22]	GO:0006468 protein phosphorylation | GO:0051301 cell division	GO:0004672 protein kinase activity | GO:0005524 ATP binding	--
CGLO_15083	0.839948	0.858987	0.0323363	Up	0.980978	717	EQB45953	gi|530463222|gb|EQB45953.1|	cholera enterotoxin subunit A2 [Colletotrichum gloeosporioides Cg-14]	--	--	GO:0008152 metabolic process | GO:0009405 pathogenesis	GO:0003824 catalytic activity	GO:0005576 extracellular region
CGLO_07641	1810	1127.16	-0.683303	Down	0.255359	2355	EQB52707	gi|530472023|gb|EQB52707.1|	metallopeptidase [Colletotrichum gloeosporioides Cg-14]	--	--	--	--	--
CGLO_10305	15.9593	9.61942	-0.730374	Down	0.600079	1131	EQB50269	gi|530469030|gb|EQB50269.1|	hypothetical protein CGLO_10305 [Colletotrichum gloeosporioides Cg-14]	smp:SMAC_07153	hypothetical protein; K03380 phenol 2-monooxygenase [EC:1.14.13.7]	--	--	GO:0016021 integral component of membrane
CGLO_15144	0.534526	0.661528	0.307542	Up	0.853363	981	EQB45906	gi|530463157|gb|EQB45906.1|	hypothetical protein CGLO_15144 [Colletotrichum gloeosporioides Cg-14]	--	--	GO:0098869 cellular oxidant detoxification	GO:0004601 peroxidase activity	--
CGLO_00621	24.8311	26.5187	0.0948622	Up	0.966181	1263	EQB59061	gi|530479968|gb|EQB59061.1|	hypothetical protein CGLO_00621 [Colletotrichum gloeosporioides Cg-14]	vda:VDAG_06005	GPI mannosyltransferase; K05284 phosphatidylinositol glycan, class M [EC:2.4.1.-]	GO:0006506 GPI anchor biosynthetic process | GO:0031505 fungal-type cell wall organization	GO:0016758 transferase activity, transferring hexosyl groups	GO:0016021 integral component of membrane
CGLO_10527	1.98435	3.54531	0.837249	Up	0.601489	723	EQB50065	gi|530468767|gb|EQB50065.1|	hypothetical protein CGLO_10527 [Colletotrichum gloeosporioides Cg-14]	afv:AFLA_005130	L-lysine 2,3-aminomutase, putative; K01843 lysine 2,3-aminomutase [EC:5.4.3.2]	--	--	--
CGLO_06440	58.0313	68.7463	0.24445	Up	0.853363	879	EQB53805	gi|530473352|gb|EQB53805.1|	hypothetical protein CGLO_06440 [Colletotrichum gloeosporioides Cg-14]	ela:UCREL1_3749	putative mitochondrial outer membrane protein; K17776 metaxin	--	--	--
CGLO_01322	29.0453	27.6647	-0.0702605	Down	0.966181	3297	EQB58432	gi|530479190|gb|EQB58432.1|	piwi domain-containing protein [Colletotrichum gloeosporioides Cg-14]	mrr:Moror_2837	argonaute-like protein; K11593 eukaryotic translation initiation factor 2C	--	GO:0003676 nucleic acid binding	--
CGLO_15934	37.3129	39.4065	0.0787585	Up	0.966181	1194	EQB45234	gi|530462298|gb|EQB45234.1|	proline racemase [Colletotrichum gloeosporioides Cg-14]	npa:UCRNP2_5499	putative proline racemase protein; K18384 trans-L-3-hydroxyproline dehydratase [EC:4.2.1.77]	--	--	--
CGLO_10927	901.195	554.562	-0.70049	Down	0.0310723	1251	EQB49715	gi|530468311|gb|EQB49715.1|	hypothetical protein CGLO_10927 [Colletotrichum gloeosporioides Cg-14]	vda:VDAG_00988	peroxisomal membrane protein PAS20; K13344 peroxin-13	GO:0016560 protein import into peroxisome matrix, docking	GO:0030674 protein binding, bridging	GO:0016021 integral component of membrane | GO:0005778 peroxisomal membrane | GO:1990429 peroxisomal importomer complex
CGLO_14973	0.955403	1.00533	0.0734829	Up	0.966181	384	EQB46050	gi|530463348|gb|EQB46050.1|	hypothetical protein CGLO_14973 [Colletotrichum gloeosporioides Cg-14]	--	--	--	--	--
CGLO_00671	342.841	246.838	-0.473974	Down	0.340111	366	EQB59002	gi|530479896|gb|EQB59002.1|	hypothetical protein CGLO_00671 [Colletotrichum gloeosporioides Cg-14]	val:VDBG_00872	hypothetical protein; K18174 cytochrome c oxidase assembly factor 2	GO:0008152 metabolic process	GO:0016757 transferase activity, transferring glycosyl groups	GO:0016021 integral component of membrane
CGLO_13281	134.751	259.474	0.945291	Up	0.0153986	1695	EQB47562	gi|530465518|gb|EQB47562.1|	PUL domain-containing protein [Colletotrichum gloeosporioides Cg-14]	ctp:CTRG_05819	thioredoxin II; K03671 thioredoxin 1	GO:0045454 cell redox homeostasis	--	GO:0005623 cell
CGLO_08722	11.4991	5.77555	-0.993493	Down	0.439455	1164	EQB51688	gi|530470781|gb|EQB51688.1|	hypothetical protein CGLO_08722 [Colletotrichum gloeosporioides Cg-14]	ani:AN9039.2	hypothetical protein; K01613 phosphatidylserine decarboxylase [EC:4.1.1.65]	--	--	GO:0016021 integral component of membrane
CGLO_10851	3.38132	5.09478	0.591433	Up	0.795459	1089	EQB49779	gi|530468395|gb|EQB49779.1|	methyltransferase domain-containing protein [Colletotrichum gloeosporioides Cg-14]	ure:UREG_00738	hypothetical protein; K12584 m7GpppX diphosphatase [EC:3.6.1.59]	GO:0032259 methylation	GO:0008168 methyltransferase activity	--
CGLO_14001	831.663	839.505	0.0135397	Up	0.985284	2991	EQB46914	gi|530464567|gb|EQB46914.1|	calcium-translocating P-type ATPase [Colletotrichum gloeosporioides Cg-14]	vda:VDAG_03132	calcium-transporting ATPase sarcoplasmic/endoplasmic reticulum type; K05853 Ca2+ transporting ATPase, sarcoplasmic/endoplasmic reticulum [EC:3.6.3.8]	GO:0070588 calcium ion transmembrane transport | GO:0008152 metabolic process	GO:0005388 calcium-transporting ATPase activity | GO:0046872 metal ion binding | GO:0005524 ATP binding	GO:0016021 integral component of membrane
CGLO_12398	19.7152	13.4609	-0.550533	Down	0.761729	1008	EQB48376	gi|530466593|gb|EQB48376.1|	NAD dependent epimerase/dehydratase [Colletotrichum gloeosporioides Cg-14]	pgu:PGUG_05107	hypothetical protein; K17741 NADPH-dependent methylglyoxal reductase [EC:1.1.1.283]	GO:0044710 single-organism metabolic process	GO:0016853 isomerase activity | GO:0050662 coenzyme binding | GO:0016616 oxidoreductase activity, acting on the CH-OH group of donors, NAD or NADP as acceptor	--
CGLO_02056	1658.68	2326.71	0.488252	Up	0.371718	3375	EQB57783	gi|530478416|gb|EQB57783.1|	phosphatidylserine decarboxylase [Colletotrichum gloeosporioides Cg-14]	vda:VDAG_01502	C2 domain-containing protein; K01613 phosphatidylserine decarboxylase [EC:4.1.1.65]	GO:0006656 phosphatidylcholine biosynthetic process | GO:0006646 phosphatidylethanolamine biosynthetic process | GO:0016540 protein autoprocessing	GO:0004609 phosphatidylserine decarboxylase activity | GO:0005509 calcium ion binding	GO:0032153 cell division site | GO:0005829 cytosol | GO:0000139 Golgi membrane | GO:0005795 Golgi stack | GO:0010008 endosome membrane
CGLO_11642	2.06142	2.22372	0.109333	Up	0.966181	1515	EQB49046	gi|530467466|gb|EQB49046.1|	tannase and feruloyl esterase [Colletotrichum gloeosporioides Cg-14]	val:VDBG_09476	feruloyl esterase B; K09252 feruloyl esterase [EC:3.1.1.73]	GO:0016998 cell wall macromolecule catabolic process	GO:0030600 feruloyl esterase activity	GO:0005576 extracellular region
CGLO_09190	505.115	448.438	-0.171703	Down	0.853363	369	EQB51271	gi|596722565|ref|XP_007286532.1|	vacuolar ATP synthase subunit f [Colletotrichum gloeosporioides Nara gc5] >gi|429848982|gb|ELA24407.1| vacuolar ATP synthase subunit f [Colletotrichum gloeosporioides Nara gc5]	vda:VDAG_00560	vacuolar ATP synthase subunit F; K02151 V-type H+-transporting ATPase subunit F	GO:0015991 ATP hydrolysis coupled proton transport	GO:0046961 proton-transporting ATPase activity, rotational mechanism	GO:0033180 proton-transporting V-type ATPase, V1 domain
CGLO_14844	1.53665	1.8873	0.296529	Up	0.906771	876	EQB46152	gi|530463484|gb|EQB46152.1|	hypothetical protein CGLO_14844 [Colletotrichum gloeosporioides Cg-14]	--	--	--	--	--
CGLO_01835	272.322	252.445	-0.109341	Down	0.938616	3564	EQB57979	gi|530478649|gb|EQB57979.1|	copper-translocating P-type ATPase [Colletotrichum gloeosporioides Cg-14]	mtm:MYCTH_2061857	hypothetical protein; K01533 Cu2+-exporting ATPase [EC:3.6.3.4]	GO:0070574 cadmium ion transmembrane transport | GO:0006875 cellular metal ion homeostasis | GO:0008152 metabolic process	GO:0005507 copper ion binding | GO:0008551 cadmium-exporting ATPase activity | GO:0000166 nucleotide binding	GO:0016021 integral component of membrane | GO:0005886 plasma membrane
CGLO_04918	88.8238	94.0743	0.082855	Up	0.95696	360	EQB55182	gi|530475049|gb|EQB55182.1|	hypothetical protein CGLO_04918 [Colletotrichum gloeosporioides Cg-14]	--	--	--	--	--
CGLO_02506	0.965151	1.04126	0.10951	Up	0.966181	414	EQB57372	gi|530477918|gb|EQB57372.1|	hypothetical protein CGLO_02506 [Colletotrichum gloeosporioides Cg-14]	--	--	GO:0008152 metabolic process	GO:0016846 carbon-sulfur lyase activity	--
CGLO_13102	80.9804	73.2847	-0.144061	Down	0.938616	2169	EQB47715	gi|530465719|gb|EQB47715.1|	hypothetical protein CGLO_13102 [Colletotrichum gloeosporioides Cg-14]	tre:TRIREDRAFT_112134	hypothetical protein; K00480 salicylate hydroxylase [EC:1.14.13.1]	GO:0006357 regulation of transcription from RNA polymerase II promoter	GO:0008270 zinc ion binding | GO:0000981 RNA polymerase II transcription factor activity, sequence-specific DNA binding | GO:0003677 DNA binding	GO:0005634 nucleus
CGLO_12675	0.81404	0.841495	0.0478558	Up	0.979526	1590	EQB48124	gi|530466261|gb|EQB48124.1|	hypothetical protein CGLO_12675 [Colletotrichum gloeosporioides Cg-14]	--	--	--	--	--
CGLO_10295	364.262	353.908	-0.041603	Down	0.966181	717	EQB50273	gi|530469035|gb|EQB50273.1|	PX domain-containing protein [Colletotrichum gloeosporioides Cg-14]	pgr:PGTG_15875	hypothetical protein; K17919 sorting nexin-4	--	GO:0035091 phosphatidylinositol binding	--
CGLO_04275	123.242	92.406	-0.415435	Down	0.761729	1878	EQB55756	gi|530475738|gb|EQB55756.1|	major facilitator superfamily transporter [Colletotrichum gloeosporioides Cg-14]	pno:SNOG_01606	hypothetical protein; K08157 MFS transporter, DHA1 family, multidrug resistance protein	GO:0055085 transmembrane transport	--	GO:0016021 integral component of membrane
CGLO_03539	1.59218	1.38451	-0.201626	Down	0.94343	1329	EQB56465	gi|530476589|gb|EQB56465.1|	hypothetical protein CGLO_03539 [Colletotrichum gloeosporioides Cg-14]	--	--	--	--	--
CGLO_16654	0.79389	0.964733	0.281192	Up	0.853363	354	EQB44588	gi|530461487|gb|EQB44588.1|	hypothetical protein CGLO_16654 [Colletotrichum gloeosporioides Cg-14]	--	--	--	--	--
CGLO_00629	364.435	402.442	0.143119	Up	0.902858	1332	EQB59041	gi|530479946|gb|EQB59041.1|	nucleotidyl transferase [Colletotrichum gloeosporioides Cg-14]	tmn:UCRPA7_7264	putative mannose-1-phosphate guanyltransferase protein; K00966 mannose-1-phosphate guanylyltransferase [EC:2.7.7.13]	GO:0009298 GDP-mannose biosynthetic process	GO:0016779 nucleotidyltransferase activity	GO:0005634 nucleus | GO:0005829 cytosol
CGLO_10413	4825.5	3840.59	-0.329352	Down	0.440855	822	EQB50163	gi|530468902|gb|EQB50163.1|	hypothetical protein CGLO_10413 [Colletotrichum gloeosporioides Cg-14]	--	--	--	--	GO:0016021 integral component of membrane
[truncated: 11,530 more rows]
